# Supplementary material for: In silico genome-wide miRNA-QTL-SNPs analyses identify a functional SNP associated with mastitis in Holsteins
Source: BMC Genet. 2019 May 16;20:46. doi: 10.1186/s12863-019-0749-5 (PMC6524300; doi:10.1186/s12863-019-0749-5)
Supplement: Supplementary file 3 — Table S2. Candidate miRNA-related SNPs located in the QTLs of 8 traits including CM, SCC, SCS, UDPTH, TLGTH, UCI, UHT and NEUT (8 sheets). (.xlsx). (XLSX 289 kb) [file 12863_2019_749_MOESM3_ESM.xlsx]

## Sheet: CM
SNP_ID	refNCBI	refUCSC	Allele	Chromosome	chromStart	chromEnd	Pre_miRNA_ID	Pre-miRNA	Strand	Start position of pre-miRNA	End position of pre-miRNA	Position in_pre-miRNA	Name of Mature_sequence	Position in_mature_sequence	inseed	QTL	Number of QTL(#)
rs458138832	G	G	G/T	11	10862188	10862189	MI0011305	bta-mir-2295	-	10862186	10862252	64				Clinical mastitis	4953
rs435082045	A	A	A/G	11	10862217	10862218	MI0011305	bta-mir-2295	-	10862186	10862252	35				Clinical mastitis	4953
rs445463552	C	C	C/T	11	10862231	10862232	MI0011305	bta-mir-2295	-	10862186	10862252	21				Clinical mastitis	4953
rs464837398	G	G	G/T	11	10862232	10862233	MI0011305	bta-mir-2295	-	10862186	10862252	20				Clinical mastitis	4953
rs436756852	A	A	A/G	11	10862236	10862237	MI0011305	bta-mir-2295	-	10862186	10862252	16				Clinical mastitis	4953
rs456906049	A	A	A/G	11	10862242	10862243	MI0011305	bta-mir-2295	-	10862186	10862252	10				Clinical mastitis	4953
rs473918278	C	C	A/C/T	11	10862251	10862252	MI0011305	bta-mir-2295	-	10862186	10862252	1				Clinical mastitis	4953
rs448777522	T	T	C/T	11	11316159	11316160	MI0011304	bta-mir-2294	+	11316131	11316193	30				Clinical mastitis	4953
rs465572891	A	A	A/C	11	11316166	11316167	MI0011304	bta-mir-2294	+	11316131	11316193	37				Clinical mastitis	4953
rs479230315	C	C	A/C	11	11316175	11316176	MI0011304	bta-mir-2294	+	11316131	11316193	46				Clinical mastitis	4953
rs445088675	T	T	C/T	11	11316180	11316181	MI0011304	bta-mir-2294	+	11316131	11316193	51				Clinical mastitis	4953
rs456690846	G	G	A/G	13	47087698	47087699	MI0022276	bta-mir-2285m-2	-	47087660	47087740	42				Clinical mastitis	19017
rs476958360	A	A	A/C	13	47087701	47087702	MI0022276	bta-mir-2285m-2	-	47087660	47087740	39				Clinical mastitis	19017
rs442267741	C	C	C/T	13	47087702	47087703	MI0022276	bta-mir-2285m-2	-	47087660	47087740	38				Clinical mastitis	19017
rs462124377	G	G	A/G	13	47087707	47087708	MI0022276	bta-mir-2285m-2	-	47087660	47087740	33				Clinical mastitis	19017
rs525969814	G	G	-/G	13	47087707	47087708	MI0022276	bta-mir-2285m-2	-	47087660	47087740	33				Clinical mastitis	19017
rs479102252	A	A	A/C	13	47087711	47087712	MI0022276	bta-mir-2285m-2	-	47087660	47087740	29				Clinical mastitis	19017
rs441157738	C	C	A/C	13	47087714	47087715	MI0022276	bta-mir-2285m-2	-	47087660	47087740	26				Clinical mastitis	19017
rs458112127	T	T	A/T	13	47087718	47087719	MI0022276	bta-mir-2285m-2	-	47087660	47087740	22				Clinical mastitis	19017
rs449954218	G	G	A/G/T	13	47087719	47087720	MI0022276	bta-mir-2285m-2	-	47087660	47087740	21				Clinical mastitis	19017
rs445825644	A	A	A/C/T	13	47087721	47087722	MI0022276	bta-mir-2285m-2	-	47087660	47087740	19				Clinical mastitis	19017
rs469166012	C	C	C/T	13	47087722	47087723	MI0022276	bta-mir-2285m-2	-	47087660	47087740	18				Clinical mastitis	19017
rs482997840	G	G	C/G	13	47087729	47087730	MI0022276	bta-mir-2285m-2	-	47087660	47087740	11				Clinical mastitis	19017
rs448320097	C	C	C/T	13	47087730	47087731	MI0022276	bta-mir-2285m-2	-	47087660	47087740	10				Clinical mastitis	19017
rs135878508	C	C	C/T	13	47087731	47087732	MI0022276	bta-mir-2285m-2	-	47087660	47087740	9				Clinical mastitis	19017
rs440019364	T	T	G/T	13	51742423	51742424	MI0005456	bta-mir-103-2	-	51742422	51742497	74				Clinical mastitis	19017
rs455844741	A	A	A/G	13	51742466	51742467	MI0005456	bta-mir-103-2	-	51742422	51742497	31				Clinical mastitis	19017
rs477213889	A	A	A/C	13	51742488	51742489	MI0005456	bta-mir-103-2	-	51742422	51742497	9				Clinical mastitis	19017
rs450214180	C	C	C/G	14	8080336	8080337	MI0004747	bta-mir-30d	+	8080292	8080361	46				Clinical mastitis	3177
rs461847045	A	A	A/G	14	8084730	8084731	MI0004761	bta-mir-30b	+	8084721	8084808	11				Clinical mastitis	3177
rs481840407	G	G	C/G	14	8084731	8084732	MI0004761	bta-mir-30b	+	8084721	8084808	12				Clinical mastitis	3177
rs723362552	G	G	A/G	14	38166557	38166558	MI0011324	bta-mir-1603	+	38166557	38166627	2				Clinical mastitis	2495
rs801090903	G	G	A/G	14	39024856	39024857	MI0011325	bta-mir-2284l	+	39024820	39024892	38				Clinical mastitis	2495
rs722621216	T	T	C/T	14	39024858	39024859	MI0011325	bta-mir-2284l	+	39024820	39024892	40				Clinical mastitis	2495
rs520736543	C	C	C/T	14	48094735	48094736	MI0011326	bta-mir-2489	+	48094677	48094754	60				Clinical mastitis	19022
rs381789165	A	A	A/C	14	48094743	48094744	MI0011326	bta-mir-2489	+	48094677	48094754	68				Clinical mastitis	19022
rs383556863	T	T	C/T	14	48094744	48094745	MI0011326	bta-mir-2489	+	48094677	48094754	69				Clinical mastitis	19022
rs136326300	C	C	C/T	14	48094752	48094753	MI0011326	bta-mir-2489	+	48094677	48094754	77				Clinical mastitis	19022
rs456175250	C	C	C/G	15	14156932	14156933	MI0021113	bta-mir-1260b	-	14156932	14157031	99				Clinical mastitis	4985
rs469850552	A	A	A/C	15	14156933	14156934	MI0021113	bta-mir-1260b	-	14156932	14157031	98				Clinical mastitis	4985
rs432042365	G	G	C/G	15	14156936	14156937	MI0021113	bta-mir-1260b	-	14156932	14157031	95				Clinical mastitis	4985
rs452167585	C	C	C/G	15	14156941	14156942	MI0021113	bta-mir-1260b	-	14156932	14157031	90				Clinical mastitis	4985
rs472170630	A	A	A/C	15	14156953	14156954	MI0021113	bta-mir-1260b	-	14156932	14157031	78				Clinical mastitis	4985
rs441169410	C	C	A/C	15	14156955	14156956	MI0021113	bta-mir-1260b	-	14156932	14157031	76				Clinical mastitis	4985
rs454792973	C	C	A/C	15	14156961	14156962	MI0021113	bta-mir-1260b	-	14156932	14157031	70				Clinical mastitis	4985
rs466995434	C	C	C/G	15	14156967	14156968	MI0021113	bta-mir-1260b	-	14156932	14157031	64				Clinical mastitis	4985
rs474825353	A	A	A/G	15	14156971	14156972	MI0021113	bta-mir-1260b	-	14156932	14157031	60				Clinical mastitis	4985
rs443373284	C	C	C/G	15	14156976	14156977	MI0021113	bta-mir-1260b	-	14156932	14157031	55				Clinical mastitis	4985
rs463015358	A	A	A/G	15	14156979	14156980	MI0021113	bta-mir-1260b	-	14156932	14157031	52				Clinical mastitis	4985
rs483204212	A	A	A/G	15	14156982	14156983	MI0021113	bta-mir-1260b	-	14156932	14157031	49				Clinical mastitis	4985
rs438853899	A	A	A/C	15	14156988	14156989	MI0021113	bta-mir-1260b	-	14156932	14157031	43				Clinical mastitis	4985
rs458814599	G	G	A/G	15	14156989	14156990	MI0021113	bta-mir-1260b	-	14156932	14157031	42				Clinical mastitis	4985
rs478793274	C	C	C/G	15	14156990	14156991	MI0021113	bta-mir-1260b	-	14156932	14157031	41				Clinical mastitis	4985
rs447907176	G	G	G/T	15	14156992	14156993	MI0021113	bta-mir-1260b	-	14156932	14157031	39				Clinical mastitis	4985
rs468051222	T	T	G/T	15	14156993	14156994	MI0021113	bta-mir-1260b	-	14156932	14157031	38				Clinical mastitis	4985
rs454753144	G	G	A/G	15	14157012	14157013	MI0021113	bta-mir-1260b	-	14156932	14157031	19				Clinical mastitis	4985
rs136690815	A	A	A/G	15	14157013	14157014	MI0021113	bta-mir-1260b	-	14156932	14157031	18				Clinical mastitis	4985
rs134279894	T	T	C/T	15	14157014	14157015	MI0021113	bta-mir-1260b	-	14156932	14157031	17				Clinical mastitis	4985
rs443494433	G	G	G/T	15	14157016	14157017	MI0021113	bta-mir-1260b	-	14156932	14157031	15				Clinical mastitis	4985
rs457175280	A	A	A/G	15	14157019	14157020	MI0021113	bta-mir-1260b	-	14156932	14157031	12				Clinical mastitis	4985
rs470591115	G	G	C/G	15	14157023	14157024	MI0021113	bta-mir-1260b	-	14156932	14157031	8				Clinical mastitis	4985
rs436285178	G	G	A/G	16	50502478	50502479	MI0011342	bta-mir-2320	+	50502447	50502521	33				Clinical mastitis	19023
rs451157183	T	T	G/T	16	50502493	50502494	MI0011342	bta-mir-2320	+	50502447	50502521	48				Clinical mastitis	19023
rs385638183	G	G	A/G	16	50741094	50741095	MI0009863	bta-mir-551a	+	50741093	50741187	3				Clinical mastitis	19023
rs476925596	A	A	A/G	16	50741096	50741097	MI0009863	bta-mir-551a	+	50741093	50741187	5				Clinical mastitis	19023
rs443826730	A	A	A/C	16	50741121	50741122	MI0009863	bta-mir-551a	+	50741093	50741187	30				Clinical mastitis	19023
rs462326862	G	G	C/G	16	50741125	50741126	MI0009863	bta-mir-551a	+	50741093	50741187	34				Clinical mastitis	19023
rs480592522	G	G	G/T	16	50741128	50741129	MI0009863	bta-mir-551a	+	50741093	50741187	37				Clinical mastitis	19023
rs441282512	G	G	C/G	16	50741130	50741131	MI0009863	bta-mir-551a	+	50741093	50741187	39				Clinical mastitis	19023
rs459640922	T	T	C/T	16	50741136	50741137	MI0009863	bta-mir-551a	+	50741093	50741187	45				Clinical mastitis	19023
rs478010452	G	G	G/T	16	50741139	50741140	MI0009863	bta-mir-551a	+	50741093	50741187	48				Clinical mastitis	19023
rs445190273	C	C	C/T	16	50741147	50741148	MI0009863	bta-mir-551a	+	50741093	50741187	56				Clinical mastitis	19023
rs470104709	G	G	G/T	16	50741151	50741152	MI0009863	bta-mir-551a	+	50741093	50741187	60				Clinical mastitis	19023
rs431985220	G	G	G/T	16	50741174	50741175	MI0009863	bta-mir-551a	+	50741093	50741187	83				Clinical mastitis	19023
rs456903311	T	T	C/T	16	50741175	50741176	MI0009863	bta-mir-551a	+	50741093	50741187	84				Clinical mastitis	19023
rs476968625	G	G	C/G	16	50741177	50741178	MI0009863	bta-mir-551a	+	50741093	50741187	86				Clinical mastitis	19023
rs437514103	A	A	A/G	16	50741186	50741187	MI0009863	bta-mir-551a	+	50741093	50741187	95				Clinical mastitis	19023
rs433186167	C	C	C/T	16	51778223	51778224	MI0013071	bta-mir-2896	+	51778219	51778275	6				Clinical mastitis	19023
rs465885547	A	A	A/C	16	52522016	52522017	MI0005055	bta-mir-200b	-	52521992	52522050	34				Clinical mastitis	19023
rs434375031	A	A	A/C	16	52522019	52522020	MI0005055	bta-mir-200b	-	52521992	52522050	31				Clinical mastitis	19023
rs451193212	A	A	A/C	16	52522021	52522022	MI0005055	bta-mir-200b	-	52521992	52522050	29				Clinical mastitis	19023
rs471545168	C	C	A/C	16	52522025	52522026	MI0005055	bta-mir-200b	-	52521992	52522050	25				Clinical mastitis	19023
rs443304754	A	A	A/C	16	52522026	52522027	MI0005055	bta-mir-200b	-	52521992	52522050	24				Clinical mastitis	19023
rs456972929	G	G	A/G	16	52522036	52522037	MI0005055	bta-mir-200b	-	52521992	52522050	14				Clinical mastitis	19023
rs474427949	T	T	C/T	16	52522042	52522043	MI0005055	bta-mir-200b	-	52521992	52522050	8				Clinical mastitis	19023
rs443012415	A	A	A/C	16	52522043	52522044	MI0005055	bta-mir-200b	-	52521992	52522050	7				Clinical mastitis	19023
rs516011186	G	G	A/G	17	46313731	46313732	MI0025187	bta-mir-2285af-2	+	46313731	46313819	2				Clinical mastitis	19024
rs723308798	T	T	C/T	17	46313734	46313735	MI0025187	bta-mir-2285af-2	+	46313731	46313819	5				Clinical mastitis	19024
rs464530130	C	C	A/C	17	46313817	46313818	MI0025187	bta-mir-2285af-2	+	46313731	46313819	88				Clinical mastitis	19024
rs479454440	C	C	A/C	18	56407843	56407844	MI0005058	bta-mir-150	-	56407843	56407942	99				Clinical mastitis	3176
rs447130486	G	G	C/G	18	56407845	56407846	MI0005058	bta-mir-150	-	56407843	56407942	97				Clinical mastitis	3176
rs465662285	A	A	A/C	18	56407851	56407852	MI0005058	bta-mir-150	-	56407843	56407942	91				Clinical mastitis	3176
rs477627257	T	T	A/G/T	18	56407852	56407853	MI0005058	bta-mir-150	-	56407843	56407942	90				Clinical mastitis	3176
rs451149332	C	C	A/C	18	56407853	56407854	MI0005058	bta-mir-150	-	56407843	56407942	89				Clinical mastitis	3176
rs469600405	C	C	C/G	18	56407857	56407858	MI0005058	bta-mir-150	-	56407843	56407942	85				Clinical mastitis	3176
rs436446922	A	A	A/G	18	56407858	56407859	MI0005058	bta-mir-150	-	56407843	56407942	84				Clinical mastitis	3176
rs455038443	T	T	C/T	18	56407861	56407862	MI0005058	bta-mir-150	-	56407843	56407942	81				Clinical mastitis	3176
rs466944838	T	T	C/T	18	56407869	56407870	MI0005058	bta-mir-150	-	56407843	56407942	73				Clinical mastitis	3176
rs434020222	A	A	A/C/G	18	56407876	56407877	MI0005058	bta-mir-150	-	56407843	56407942	66				Clinical mastitis	3176
rs453172786	G	G	G/T	18	56407880	56407881	MI0005058	bta-mir-150	-	56407843	56407942	62				Clinical mastitis	3176
rs471700938	G	G	C/G/T	18	56407888	56407889	MI0005058	bta-mir-150	-	56407843	56407942	54				Clinical mastitis	3176
rs461049036	T	T	G/T	18	56407930	56407931	MI0005058	bta-mir-150	-	56407843	56407942	12				Clinical mastitis	3176
rs479447705	A	A	A/C	18	56407932	56407933	MI0005058	bta-mir-150	-	56407843	56407942	10				Clinical mastitis	3176
rs440025014	G	G	C/G	18	56407938	56407939	MI0005058	bta-mir-150	-	56407843	56407942	4				Clinical mastitis	3176
rs458425588	A	A	A/G	21	5654833	5654834	MI0011392	bta-mir-2362	-	5654805	5654871	38				Clinical mastitis	5451
rs110697855	C	C	A/C	21	5654861	5654862	MI0011392	bta-mir-2362	-	5654805	5654871	10				Clinical mastitis	5451
rs474316920	C	C	C/T	26	29429657	29429658	MI0022332	bta-mir-2285k-4	+	29429648	29429720	11				Clinical mastitis	4994
rs379019464	A	A	A/T	26	29429669	29429670	MI0022332	bta-mir-2285k-4	+	29429648	29429720	23				Clinical mastitis	4994
rs448112257	G	G	G/T	26	29429687	29429688	MI0022332	bta-mir-2285k-4	+	29429648	29429720	41				Clinical mastitis	4994
rs442270186	A	A	A/C	27	21315208	21315209	MI0009823	bta-mir-383	+	21315203	21315275	7				Clinical mastitis	2496
rs459804800	T	T	G/T	3	74462333	74462334	MI0005033	bta-mir-186	+	74462295	74462380	40				Clinical mastitis	2489
rs456705804	T	T	G/T	3	74462361	74462362	MI0005033	bta-mir-186	+	74462295	74462380	68				Clinical mastitis	2489
rs433582479	C	C	C/G	4	47367065	47367066	MI0011465	bta-mir-2284b	-	47367036	47367106	41				Clinical mastitis	19008
rs453301610	A	A	A/G	4	49304453	49304454	MI0011464	bta-mir-2418	-	49304452	49304527	74				Clinical mastitis	19008
rs797735685	C	C	C/T	4	49304463	49304464	MI0011464	bta-mir-2418	-	49304452	49304527	64				Clinical mastitis	19008
rs475060247	A	A	A/G	4	49304467	49304468	MI0011464	bta-mir-2418	-	49304452	49304527	60				Clinical mastitis	19008
rs442077610	G	G	C/G	4	49304468	49304469	MI0011464	bta-mir-2418	-	49304452	49304527	59				Clinical mastitis	19008
rs460970423	C	C	C/G	4	49304475	49304476	MI0011464	bta-mir-2418	-	49304452	49304527	52				Clinical mastitis	19008
rs473168171	A	A	A/T	4	50323246	50323247	MI0011463	bta-mir-2417	-	50323245	50323319	73				Clinical mastitis	19008
rs433898595	A	A	A/C	4	50323247	50323248	MI0011463	bta-mir-2417	-	50323245	50323319	72				Clinical mastitis	19008
rs109241061	T	T	G/T	4	50323253	50323254	MI0011463	bta-mir-2417	-	50323245	50323319	66				Clinical mastitis	19008
rs473862646	A	A	A/T	4	50323258	50323259	MI0011463	bta-mir-2417	-	50323245	50323319	61				Clinical mastitis	19008
rs109043630	A	A	A/G	4	50323265	50323266	MI0011463	bta-mir-2417	-	50323245	50323319	54				Clinical mastitis	19008
rs455972120	A	A	A/C	4	50323268	50323269	MI0011463	bta-mir-2417	-	50323245	50323319	51				Clinical mastitis	19008
rs471545043	T	T	G/T	4	50323272	50323273	MI0011463	bta-mir-2417	-	50323245	50323319	47				Clinical mastitis	19008
rs438466110	A	A	A/T	4	50323274	50323275	MI0011463	bta-mir-2417	-	50323245	50323319	45				Clinical mastitis	19008
rs110656452	C	C	C/T	4	50323280	50323281	MI0011463	bta-mir-2417	-	50323245	50323319	39				Clinical mastitis	19008
rs479270572	A	A	A/C	4	50323290	50323291	MI0011463	bta-mir-2417	-	50323245	50323319	29				Clinical mastitis	19008
rs439108795	T	T	G/T	5	30952191	30952192	MI0011476	bta-mir-2426	+	30952153	30952226	40				Clinical mastitis	4973
rs457697282	A	A	A/C	5	30952204	30952205	MI0011476	bta-mir-2426	+	30952153	30952226	53				Clinical mastitis	4973
rs471376487	A	A	A/C	5	30952206	30952207	MI0011476	bta-mir-2426	+	30952153	30952226	55				Clinical mastitis	4973
rs443273401	T	T	G/T	5	30952211	30952212	MI0011476	bta-mir-2426	+	30952153	30952226	60				Clinical mastitis	4973
rs463447618	T	T	C/T	5	30952220	30952221	MI0011476	bta-mir-2426	+	30952153	30952226	69				Clinical mastitis	4973
rs480390600	T	T	G/T	5	30952221	30952222	MI0011476	bta-mir-2426	+	30952153	30952226	70				Clinical mastitis	4973
rs438273771	A	A	A/G	5	31283948	31283949	MI0010458	bta-mir-1291	+	31283919	31283992	31				Clinical mastitis	4973
rs455256602	C	C	C/G	5	31283952	31283953	MI0010458	bta-mir-1291	+	31283919	31283992	35				Clinical mastitis	4973
rs475288931	C	C	A/C	5	31283955	31283956	MI0010458	bta-mir-1291	+	31283919	31283992	38				Clinical mastitis	4973
rs442457711	G	G	G/T	5	31283957	31283958	MI0010458	bta-mir-1291	+	31283919	31283992	40				Clinical mastitis	4973
rs452822219	T	T	C/T	5	31283959	31283960	MI0010458	bta-mir-1291	+	31283919	31283992	42				Clinical mastitis	4973
rs473103242	G	G	A/G	5	31283970	31283971	MI0010458	bta-mir-1291	+	31283919	31283992	53				Clinical mastitis	4973
rs438471089	G	G	G/T	5	31283971	31283972	MI0010458	bta-mir-1291	+	31283919	31283992	54				Clinical mastitis	4973
rs458753878	C	C	A/C	5	31283972	31283973	MI0010458	bta-mir-1291	+	31283919	31283992	55				Clinical mastitis	4973
rs481982184	C	C	A/C	5	31283974	31283975	MI0010458	bta-mir-1291	+	31283919	31283992	57				Clinical mastitis	4973
rs444230896	C	C	C/G	5	31283981	31283982	MI0010458	bta-mir-1291	+	31283919	31283992	64				Clinical mastitis	4973
rs461297784	C	C	C/G	5	31283988	31283989	MI0010458	bta-mir-1291	+	31283919	31283992	71				Clinical mastitis	4973
rs797625027	C	C	C/T	5	57121907	57121908	MI0011482	bta-mir-677	+	57121853	57121918	56				Clinical mastitis	10113
rs41611295	G	G	C/T	5	91263080	91263081	MI0022339	bta-mir-2284z-6	-	91263057	91263136	56				Clinical mastitis	57298
rs41611295	G	G	C/T	5	91263080	91263081	MI0025188	bta-mir-2285y	+	91263055	91263139	27				Clinical mastitis	57298
rs719544917	C	C	C/T	5	91263101	91263102	MI0022339	bta-mir-2284z-6	-	91263057	91263136	35				Clinical mastitis	57298
rs719544917	C	C	C/T	5	91263101	91263102	MI0025188	bta-mir-2285y	+	91263055	91263139	48				Clinical mastitis	57298
rs435890218	A	A	A/G	6	14162599	14162600	MI0009794	bta-mir-302c	+	14162579	14162646	22				Clinical mastitis	2493
rs443007346	A	A	A/T	6	14162982	14162983	MI0009791	bta-mir-302a	+	14162972	14163041	12				Clinical mastitis	2493
rs459875800	G	G	A/G	6	14162985	14162986	MI0009791	bta-mir-302a	+	14162972	14163041	15				Clinical mastitis	2493
rs480215338	T	T	G/T	6	14162995	14162996	MI0009791	bta-mir-302a	+	14162972	14163041	25				Clinical mastitis	2493
rs444790613	T	T	G/T	6	14162996	14162997	MI0009791	bta-mir-302a	+	14162972	14163041	26				Clinical mastitis	2493
rs464930756	A	A	A/G	6	14163008	14163009	MI0009791	bta-mir-302a	+	14162972	14163041	38				Clinical mastitis	2493
rs432282775	T	T	G/T	6	14163156	14163157	MI0009792	bta-mir-302d	+	14163149	14163218	9				Clinical mastitis	2493
rs451652910	A	A	A/C	6	14163161	14163162	MI0009792	bta-mir-302d	+	14163149	14163218	14				Clinical mastitis	2493
rs451366668	A	A	A/T	6	14163192	14163193	MI0009792	bta-mir-302d	+	14163149	14163218	45				Clinical mastitis	2493
rs451936516	G	G	A/G	6	15440810	15440811	MI0011498	bta-mir-2444	-	15440766	15440840	30				Clinical mastitis	2493
rs110808436	T	T	C/T	7	50687459	50687460	MI0009900	bta-mir-874	-	50687424	50687499	40				Clinical mastitis	19014
rs440469735	A	A	A/C	7	51349706	51349707	MI0011518	bta-mir-2459	+	51349701	51349770	7				Clinical mastitis	19014
rs381407610	-	-	-/T	7	51349710	51349710	MI0011518	bta-mir-2459	+	51349701	51349770	10				Clinical mastitis	19014
rs724061424	C	C	C/T	7	51349725	51349726	MI0011518	bta-mir-2459	+	51349701	51349770	26				Clinical mastitis	19014
rs479024632	T	T	G/T	7	51349737	51349738	MI0011518	bta-mir-2459	+	51349701	51349770	38				Clinical mastitis	19014
rs444345061	G	G	A/G	8	22534851	22534852	MI0004762	bta-mir-31	+	22534797	22534890	56				Clinical mastitis	2497
rs471848067	A	A	A/G	8	22534868	22534869	MI0004762	bta-mir-31	+	22534797	22534890	73				Clinical mastitis	2497
rs460528464	C	C	C/T	8	22534880	22534881	MI0004762	bta-mir-31	+	22534797	22534890	85				Clinical mastitis	2497
rs798867080	C	C	C/T	8	22534888	22534889	MI0004762	bta-mir-31	+	22534797	22534890	93				Clinical mastitis	2497
rs446079554	C	C	C/G	8	23661691	23661692	MI0009846	bta-mir-491	-	23661686	23661769	78				Clinical mastitis	2497
rs476368333	A	A	A/G	9	10730943	10730944	MI0009795	bta-mir-30f	-	10730929	10731012	69				Clinical mastitis	4981
rs438112093	A	A	A/T	9	10730944	10730945	MI0009795	bta-mir-30f	-	10730929	10731012	68				Clinical mastitis	4981
rs456583600	G	G	C/G	9	10730971	10730972	MI0009795	bta-mir-30f	-	10730929	10731012	41				Clinical mastitis	4981
rs475081978	A	A	A/C	9	10730973	10730974	MI0009795	bta-mir-30f	-	10730929	10731012	39				Clinical mastitis	4981
rs472855289	T	T	C/T	9	10731010	10731011	MI0009795	bta-mir-30f	-	10730929	10731012	2				Clinical mastitis	4981
rs433818484	A	A	A/C	9	10768282	10768283	MI0005054	bta-mir-30a	-	10768281	10768347	65				Clinical mastitis	4981
rs452200761	C	C	C/G	9	10768284	10768285	MI0005054	bta-mir-30a	-	10768281	10768347	63				Clinical mastitis	4981
rs470556249	C	C	C/T	9	10768287	10768288	MI0005054	bta-mir-30a	-	10768281	10768347	60				Clinical mastitis	4981
rs438932932	C	C	A/C	9	10768291	10768292	MI0005054	bta-mir-30a	-	10768281	10768347	56				Clinical mastitis	4981
rs463810403	A	A	A/C	9	10768292	10768293	MI0005054	bta-mir-30a	-	10768281	10768347	55				Clinical mastitis	4981
rs475886499	T	T	A/C/T	9	10768293	10768294	MI0005054	bta-mir-30a	-	10768281	10768347	54				Clinical mastitis	4981
rs442773242	C	C	A/C	9	10768294	10768295	MI0005054	bta-mir-30a	-	10768281	10768347	53				Clinical mastitis	4981
rs721740521	T	T	C/T	9	10768307	10768308	MI0005054	bta-mir-30a	-	10768281	10768347	40				Clinical mastitis	4981
rs526243633	C	C	C/T	9	10768313	10768314	MI0005054	bta-mir-30a	-	10768281	10768347	34				Clinical mastitis	4981
rs518092330	-	-	-/A	9	25474387	25474387	MI0011538	bta-mir-2284o	+	25474384	25474444	4				Clinical mastitis	10076
rs797709878	A	A	A/G	9	25474408	25474409	MI0011538	bta-mir-2284o	+	25474384	25474444	26				Clinical mastitis	10076
rs526979518	T	T	C/T	9	25474409	25474410	MI0011538	bta-mir-2284o	+	25474384	25474444	27				Clinical mastitis	10076
rs207677665	C	C	C/T	9	25474429	25474430	MI0011538	bta-mir-2284o	+	25474384	25474444	47				Clinical mastitis	10076
rs462639155	G	G	G/T	9	25474440	25474441	MI0011538	bta-mir-2284o	+	25474384	25474444	58				Clinical mastitis	10076
rs483291463	A	A	A/T	9	25474443	25474444	MI0011538	bta-mir-2284o	+	25474384	25474444	61				Clinical mastitis	10076
rs720984795	G	G	A/G	9	26303378	26303379	MI0011539	bta-mir-2477	+	26303342	26303413	38				Clinical mastitis	10076
rs473771097	T	T	A/T	9	28046287	28046288	MI0011540	bta-mir-2478	-	28046280	28046356	69				Clinical mastitis	10076
rs473492357	C	C	C/T	9	28046318	28046319	MI0011540	bta-mir-2478	-	28046280	28046356	38				Clinical mastitis	10076
rs472245193	T	T	A/T	9	37506026	37506027	MI0011541	bta-mir-2479	+	37505989	37506061	39				Clinical mastitis	10076
rs476057878	T	T	G/T	9	39435257	39435258	MI0022344	bta-mir-6536-2	-	39435257	39435336	79				Clinical mastitis	10076
rs476057878	T	T	G/T	9	39435257	39435258	MI0022342	bta-mir-6536-1	+	39435257	39435337	2				Clinical mastitis	10076
rs436331164	T	T	A/T	9	61455938	61455939	MI0025537	bta-mir-7862	-	61455917	61455979	41				Clinical mastitis	10087
rs468902155	A	A	A/T	9	61455949	61455950	MI0025537	bta-mir-7862	-	61455917	61455979	30				Clinical mastitis	10087
rs478189003	G	G	A/C/G	11	10862190	10862191	MI0011305	bta-mir-2295	-	10862186	10862252	62	bta-miR-2295	20		Clinical mastitis	4953
rs450258617	A	A	A/C	11	10862192	10862193	MI0011305	bta-mir-2295	-	10862186	10862252	60	bta-miR-2295	18		Clinical mastitis	4953
rs463798346	C	C	A/C	11	10862193	10862194	MI0011305	bta-mir-2295	-	10862186	10862252	59	bta-miR-2295	17		Clinical mastitis	4953
rs480888596	C	C	C/G	11	10862201	10862202	MI0011305	bta-mir-2295	-	10862186	10862252	51	bta-miR-2295	9		Clinical mastitis	4953
rs463459264	C	C	C/G	11	11316148	11316149	MI0011304	bta-mir-2294	+	11316131	11316193	19	bta-miR-2294	13		Clinical mastitis	4953
rs469279334	C	C	A/C	13	47087670	47087671	MI0022276	bta-mir-2285m-2	-	47087660	47087740	70	bta-miR-2285m	21		Clinical mastitis	19017
rs437860195	A	A	A/G	13	47087672	47087673	MI0022276	bta-mir-2285m-2	-	47087660	47087740	68	bta-miR-2285m	19		Clinical mastitis	19017
rs454456140	G	G	G/T	13	47087676	47087677	MI0022276	bta-mir-2285m-2	-	47087660	47087740	64	bta-miR-2285m	15		Clinical mastitis	19017
rs474579220	T	T	C/T	13	47087677	47087678	MI0022276	bta-mir-2285m-2	-	47087660	47087740	63	bta-miR-2285m	14		Clinical mastitis	19017
rs433559601	A	A	A/T	13	47087680	47087681	MI0022276	bta-mir-2285m-2	-	47087660	47087740	60	bta-miR-2285m	11		Clinical mastitis	19017
rs453868179	T	T	C/T	13	47087682	47087683	MI0022276	bta-mir-2285m-2	-	47087660	47087740	58	bta-miR-2285m	9		Clinical mastitis	19017
rs460189731	C	C	A/C	13	51742435	51742436	MI0005456	bta-mir-103-2	-	51742422	51742497	62	bta-miR-103	15		Clinical mastitis	19017
rs450415677	C	C	A/C	14	8084756	8084757	MI0004761	bta-mir-30b	+	8084721	8084808	37	bta-miR-30b-5p	19		Clinical mastitis	3177
rs433044593	T	T	C/T	14	8084786	8084787	MI0004761	bta-mir-30b	+	8084721	8084808	67	bta-miR-30b-3p	11		Clinical mastitis	3177
rs522236473	T	T	A/T	14	39024840	39024841	MI0011325	bta-mir-2284l	+	39024820	39024892	22	bta-miR-2284l	14		Clinical mastitis	2495
rs481674555	G	G	C/G	15	14156995	14156996	MI0021113	bta-mir-1260b	-	14156932	14157031	36	bta-miR-1260b	16		Clinical mastitis	4985
rs133713823	T	T	C/T	15	14157002	14157003	MI0021113	bta-mir-1260b	-	14156932	14157031	29	bta-miR-1260b	9		Clinical mastitis	4985
rs434333467	C	C	C/G	15	14157011	14157012	MI0021113	bta-mir-1260b	-	14156932	14157031	20	bta-miR-1260b	0		Clinical mastitis	4985
rs472323651	T	T	G/T	16	50502472	50502473	MI0011342	bta-mir-2320	+	50502447	50502521	27	bta-miR-2320-5p	17		Clinical mastitis	19023
rs136014887	C	C	C/T	16	50741152	50741153	MI0009863	bta-mir-551a	+	50741093	50741187	61	bta-miR-551a	0		Clinical mastitis	19023
rs434528203	G	G	G/T	16	50741165	50741166	MI0009863	bta-mir-551a	+	50741093	50741187	74	bta-miR-551a	13		Clinical mastitis	19023
rs453030060	T	T	G/T	16	50741167	50741168	MI0009863	bta-mir-551a	+	50741093	50741187	76	bta-miR-551a	15		Clinical mastitis	19023
rs465056595	C	C	A/C	16	50741170	50741171	MI0009863	bta-mir-551a	+	50741093	50741187	79	bta-miR-551a	18		Clinical mastitis	19023
rs439669925	A	A	A/C	16	52521344	52521345	MI0005037	bta-mir-200a	-	52521324	52521409	65	bta-miR-200a	14		Clinical mastitis	19023
rs435328797	T	T	G/T	16	52521994	52521995	MI0005055	bta-mir-200b	-	52521992	52522050	56	bta-miR-200b	19		Clinical mastitis	19023
rs438682721	C	C	A/C	18	56407908	56407909	MI0005058	bta-mir-150	-	56407843	56407942	34	bta-miR-150	14		Clinical mastitis	3176
rs456938611	A	A	A/G	18	56407910	56407911	MI0005058	bta-mir-150	-	56407843	56407942	32	bta-miR-150	12		Clinical mastitis	3176
rs382117533	G	G	A/G	26	29429700	29429701	MI0022332	bta-mir-2285k-4	+	29429648	29429720	54	bta-miR-2285k	10		Clinical mastitis	4994
rs453899455	C	C	C/T	4	47367090	47367091	MI0011465	bta-mir-2284b	-	47367036	47367106	16	bta-miR-2284b	9		Clinical mastitis	19008
rs110555814	G	G	G/T	4	49304498	49304499	MI0011464	bta-mir-2418	-	49304452	49304527	29	bta-miR-2418	21		Clinical mastitis	19008
rs443484521	A	A	A/C	4	49304499	49304500	MI0011464	bta-mir-2418	-	49304452	49304527	28	bta-miR-2418	20		Clinical mastitis	19008
rs458822162	A	A	A/C	4	49304502	49304503	MI0011464	bta-mir-2418	-	49304452	49304527	25	bta-miR-2418	17		Clinical mastitis	19008
rs477347665	C	C	C/T	4	49304503	49304504	MI0011464	bta-mir-2418	-	49304452	49304527	24	bta-miR-2418	16		Clinical mastitis	19008
rs443012308	A	A	A/C	4	50323292	50323293	MI0011463	bta-mir-2417	-	50323245	50323319	27	bta-miR-2417	19		Clinical mastitis	19008
rs453487598	A	A	A/G	5	30952182	30952183	MI0011476	bta-mir-2426	+	30952153	30952226	31	bta-miR-2426	16		Clinical mastitis	4973
rs473650323	G	G	A/G	5	30952185	30952186	MI0011476	bta-mir-2426	+	30952153	30952226	34	bta-miR-2426	19		Clinical mastitis	4973
rs721972924	C	C	A/C	5	91263111	91263112	MI0022339	bta-mir-2284z-6	-	91263057	91263136	25	bta-miR-2284z	15		Clinical mastitis	57298
rs723554676	G	G	C/G	5	91263126	91263127	MI0022339	bta-mir-2284z-6	-	91263057	91263136	10	bta-miR-2284z	0		Clinical mastitis	57298
rs723554676	G	G	C/G	5	91263126	91263127	MI0025188	bta-mir-2285y	+	91263055	91263139	73	bta-miR-2285y	20		Clinical mastitis	57298
rs716180992	G	G	A/G	8	40562589	40562590	MI0011531	bta-mir-2471	+	40562531	40562600	60	bta-miR-2471-3p	12		Clinical mastitis	2497
rs441986928	G	G	G/T	9	10730981	10730982	MI0009795	bta-mir-30f	-	10730929	10731012	31	bta-miR-30f	18		Clinical mastitis	4981
rs461320897	A	A	A/T	9	10768334	10768335	MI0005054	bta-mir-30a	-	10768281	10768347	13	bta-miR-30a-5p	12		Clinical mastitis	4981
rs521989148	G	G	A/G	9	25474398	25474399	MI0011538	bta-mir-2284o	+	25474384	25474444	16	bta-miR-2284o	10		Clinical mastitis	10076
rs476988784	G	G	G/T	9	25474400	25474401	MI0011538	bta-mir-2284o	+	25474384	25474444	18	bta-miR-2284o	12		Clinical mastitis	10076
rs451580359	A	A	A/C	9	26303393	26303394	MI0011539	bta-mir-2477	+	26303342	26303413	53	bta-miR-2477	10		Clinical mastitis	10076
rs470990396	G	G	A/G	9	26303404	26303405	MI0011539	bta-mir-2477	+	26303342	26303413	64	bta-miR-2477	21		Clinical mastitis	10076
rs443113358	T	T	G/T	9	28046294	28046295	MI0011540	bta-mir-2478	-	28046280	28046356	62	bta-miR-2478	17		Clinical mastitis	10076
rs453497992	A	A	A/G	9	28046300	28046301	MI0011540	bta-mir-2478	-	28046280	28046356	56	bta-miR-2478	11		Clinical mastitis	10076
rs516144574	G	G	A/G	9	37506010	37506011	MI0011541	bta-mir-2479	+	37505989	37506061	23	bta-miR-2479	9		Clinical mastitis	10076
rs449414882	C	C	C/G	11	10862204	10862205	MI0011305	bta-mir-2295	-	10862186	10862252	48	bta-miR-2295	6	inseed	Clinical mastitis	4953
rs466359082	G	G	C/G	11	10862208	10862209	MI0011305	bta-mir-2295	-	10862186	10862252	44	bta-miR-2295	2	inseed	Clinical mastitis	4953
rs479258168	T	T	G/T	11	11316141	11316142	MI0011304	bta-mir-2294	+	11316131	11316193	12	bta-miR-2294	6	inseed	Clinical mastitis	4953
rs470669395	G	G	C/G	13	47087684	47087685	MI0022276	bta-mir-2285m-2	-	47087660	47087740	56	bta-miR-2285m	7	inseed	Clinical mastitis	19017
rs439863837	G	G	G/T	13	47087686	47087687	MI0022276	bta-mir-2285m-2	-	47087660	47087740	54	bta-miR-2285m	5	inseed	Clinical mastitis	19017
rs464245110	T	T	G/T	14	8084782	8084783	MI0004761	bta-mir-30b	+	8084721	8084808	63	bta-miR-30b-3p	7	inseed	Clinical mastitis	3177
rs110544069	C	C	C/T	14	48094693	48094694	MI0011326	bta-mir-2489	+	48094677	48094754	18	bta-miR-2489	5	inseed	Clinical mastitis	19022
rs109834057	A	A	A/G	14	48094694	48094695	MI0011326	bta-mir-2489	+	48094677	48094754	19	bta-miR-2489	6	inseed	Clinical mastitis	19022
rs470364092	G	G	A/G	15	14157004	14157005	MI0021113	bta-mir-1260b	-	14156932	14157031	27	bta-miR-1260b	7	inseed	Clinical mastitis	4985
rs134960452	T	T	A/G/T	15	14157005	14157006	MI0021113	bta-mir-1260b	-	14156932	14157031	26	bta-miR-1260b	6	inseed	Clinical mastitis	4985
rs452203781	G	G	A/G	15	14157008	14157009	MI0021113	bta-mir-1260b	-	14156932	14157031	23	bta-miR-1260b	3	inseed	Clinical mastitis	4985
rs465785912	A	A	A/T	15	14157009	14157010	MI0021113	bta-mir-1260b	-	14156932	14157031	22	bta-miR-1260b	2	inseed	Clinical mastitis	4985
rs476254957	A	A	A/G	16	50502496	50502497	MI0011342	bta-mir-2320	+	50502447	50502521	51	bta-miR-2320-3p	2	inseed	Clinical mastitis	19023
rs482148314	G	G	G/T	16	50741153	50741154	MI0009863	bta-mir-551a	+	50741093	50741187	62	bta-miR-551a	1	inseed	Clinical mastitis	19023
rs449058712	C	C	C/G	16	50741156	50741157	MI0009863	bta-mir-551a	+	50741093	50741187	65	bta-miR-551a	4	inseed	Clinical mastitis	19023
rs467607990	C	C	A/C	16	50741157	50741158	MI0009863	bta-mir-551a	+	50741093	50741187	66	bta-miR-551a	5	inseed	Clinical mastitis	19023
rs455489961	G	G	A/G	16	52522007	52522008	MI0005055	bta-mir-200b	-	52521992	52522050	43	bta-miR-200b	6	inseed	Clinical mastitis	19023
rs475416736	T	T	G/T	18	56407915	56407916	MI0005058	bta-mir-150	-	56407843	56407942	27	bta-miR-150	7	inseed	Clinical mastitis	3176
rs442430134	G	G	G/T	18	56407920	56407921	MI0005058	bta-mir-150	-	56407843	56407942	22	bta-miR-150	2	inseed	Clinical mastitis	3176
rs518429713	G	G	A/G	2	47459026	47459027	MI0011383	bta-mir-2354	+	47459010	47459084	18	bta-miR-2354	5	inseed	Clinical mastitis	19004
rs447150505	C	C	C/G	4	49304515	49304516	MI0011464	bta-mir-2418	-	49304452	49304527	12	bta-miR-2418	4	inseed	Clinical mastitis	19008
rs110817643	C	C	C/T	5	31283923	31283924	MI0010458	bta-mir-1291	+	31283919	31283992	6	bta-miR-1291	4	inseed	Clinical mastitis	4973
rs721972924	C	C	A/C	5	91263111	91263112	MI0025188	bta-mir-2285y	+	91263055	91263139	58	bta-miR-2285y	5	inseed	Clinical mastitis	57298
rs481937675	T	T	A/T	6	14163022	14163023	MI0009791	bta-mir-302a	+	14162972	14163041	52	bta-miR-302a	5	inseed	Clinical mastitis	2493
rs454448368	G	G	G/T	9	10730992	10730993	MI0009795	bta-mir-30f	-	10730929	10731012	20	bta-miR-30f	7	inseed	Clinical mastitis	4981
rs480129889	T	T	G/T	9	10768340	10768341	MI0005054	bta-mir-30a	-	10768281	10768347	7	bta-miR-30a-5p	6	inseed	Clinical mastitis	4981
rs460143302	G	G	G/T	9	25474394	25474395	MI0011538	bta-mir-2284o	+	25474384	25474444	12	bta-miR-2284o	6	inseed	Clinical mastitis	10076
rs134036560	T	T	C/T	9	61758654	61758655	MI0013079	bta-mir-2903	+	61758630	61758717	26	bta-miR-2903	7	inseed	Clinical mastitis	10087
rs132996997
rs135711811
rs466432510
rs453829922
rs472386829
rs439387933
rs451392160
rs476319348
rs443228538
rs461768487
rs445176346
rs475278157
rs520834664
rs517541614
rs41686132
rs432326926
rs432326926
rs454296478
rs454296478
rs472904666
rs472904666
rs436591897
rs436591897
rs455074531
rs455074531
rs476836013
rs476836013
rs444186133
rs444186133
rs462631789
rs471421318
rs438391142
rs438391142
rs446686958
rs468634556
rs435599312
rs450842156
rs469457748
rs433205672
rs451830565
rs473398379
rs517147823
rs472719293
rs470978040
rs210217220
rs459817959
rs208524348
rs449890665
rs465137753
rs466224754
rs433766413
rs455576664
rs467561672
rs459152382
rs477449512
rs447544252
rs438022476
rs466163206
rs481557370
rs448583907
rs467600474
rs437760390
rs456436802
rs440781924
rs455723809
rs474220030
rs444508374
rs468387463
rs435733161
rs476930339
rs443920242
rs797407921
rs462592614
rs481068239
rs441714093
rs432765279
rs469602761
rs436928873
rs520405038
rs718747050
rs208947946
rs439219486
rs439199736
rs458016270
rs473342059
rs440223012
rs463835237
rs478940701
rs481594709
rs450174834
rs470184534
rs477448557
rs446050465
rs466500550
rs435050840
rs456687317
rs475997737
rs438412990
rs208923471
rs450084019
rs468617460
rs433386385
rs451914028
rs520661050
rs525598757
rs470451202
rs437501247
rs455161708
rs524829560
rs473609227
rs380764141
rs382891649
rs714402541
rs518170579
rs449050053
rs466274146
rs434871154
rs474292110
rs443022732
rs453477024
rs472320870
rs440846288
rs457665260
rs520651881
rs471363637
rs443559300
rs463682620
rs480512306
rs516346319
rs457631339
rs477715882
rs449766878
rs470018404
rs435406951
rs449151810
rs466108135
rs433286431
rs480550119
rs448955788
rs465994943
rs456522861
rs470446851
rs463384003
rs480538282
rs456301210
rs476345508
rs441577719
rs461798880
rs478746938
rs440895259
rs460698575
rs477618360
rs446289075
rs464177145
rs41885631
rs41885631
rs477872416
rs524412685
rs210343727
rs446469426
rs466447339
rs435117271
rs449973878
rs469994220
rs432109855
rs445769489
rs465929568
rs434471907
rs454546658
rs468125695
rs436681037
rs471067312
rs464915577
rs477152749
rs467089971
rs433998235
rs452391752
rs473423225
rs440515974
rs456020882
rs479761568
rs446759815
rs468413588
rs797365654
rs432380120
rs441391394
rs461561514
rs475270775
rs443963360
rs464081103
rs518830150
rs482597761
rs444887971
rs458574655
rs478756905
rs464361766
rs437288242
rs439384590
rs522924345
rs466227363
rs455701634
rs475970114
rs444527782
rs451756786
rs460283394
rs480273288
rs442399576
rs462348439
rs384308405
rs482653760
rs444919249
rs714708975
rs469092153
rs482486733
rs451026203
rs464882796
rs433423880
rs447157426
rs432076775
rs452217996
rs110217469
rs445339415
rs446025669
rs464690624
rs438063224
rs454279972
rs472678584
rs483196582
rs207904456
rs715761811
rs468650699
rs435805602
rs454144201
rs435198851
rs453639207
rs720709661
rs460213643
rs472351908
rs439756292
rs722633950
rs799736714
rs435568454
rs454239349
rs444411729
rs472678932
rs433806832
rs452197661
rs210782551
rs470556082
rs208992339
rs474656822
rs444497615
rs462828661
rs474988085
rs474988085
rs452161417
rs470659145
rs478750309
rs446781877
rs465221563
rs477505057
rs450906221
rs469556245
rs436579148
rs455167637
rs467250980
rs434294552
rs452097761
rs470586445
rs444075201
rs456169139
rs474769250
rs441782249
rs460206186
rs478688655
rs439481452
rs444839495
rs463453328
rs482007647
rs449047586
rs467588591
rs434628281
rs446769055
rs465314066
rs433162555
rs451636557
rs476719238
rs437304053
rs455739520
rs474216348
rs441420909
rs459873719
rs472112736
rs438365406
rs463342654
rs481937966
rs449012402
rs461099595
rs479608028
rs446707711
rs465255119
rs432301284
rs442494014
rs461036590
rs479544607
rs440210722
rs458703396
rs477306511
rs450706053
rs520232478
rs453413199
rs467100435
rs432719743
rs448056709
rs468271700
rs433618880
rs447375288
rs137311576
rs464370663
rs135646700
rs432955217
rs456384827
rs476516789
rs435560982
rs455535094
rs443781501
rs464041725
rs448093877
rs461779027
rs136746452
rs447328787
rs464229072
rs433000756
rs449821299
rs470080260
rs434729441
rs451721245
rs458523308
rs481844341
rs436020868
rs446611846
rs383303965
rs380935727
rs442288511
rs518070453
rs445323575
rs465363913
rs437153435
rs432112526
rs452170498
rs475416069
rs443953983
rs471334215
rs433305280
rs718061452
rs442284896
rs462475853
rs440420372
rs462106030
rs480765380
rs445711630
rs464290221
rs525962423
rs434463691
rs452918587
rs468165453
rs435483675
rs457186561
rs457581427
rs439400906
rs451373402
rs473563742
rs438228095
rs714704092
rs456756766
rs441786573
rs461485972
rs453282545
rs723439207
rs468994112
rs432805699
rs110339121
rs466519287
rs466519287
rs434921709
rs434921709
rs453384516
rs453384516
rs475065413
rs475065413
rs442294414
rs442294414
rs457608116
rs457608116
rs475831448
rs475831448
rs439625522
rs439625522
rs458198446
rs458198446
rs524184723
rs524184723
rs479935021
rs479935021
rs440186155
rs440186155
rs461951044
rs461951044
rs433660833
rs433660833
rs448935827
rs448935827
rs468600262
rs468600262
rs435813987
rs472742195
rs439970082
rs460173649
rs433894495
rs466930380
rs435734491
rs449505526
rs469659593
rs438285671
rs456845710
rs470606091
rs521325767
rs522134373
rs432776405
rs453009503
rs473137329
rs441792447
rs477985782
rs440395658
rs460465268
rs799910088
rs800726812
rs134521333
rs444587136
rs438972411
rs457237117
rs475729965
rs525116489
rs442753704
rs461340128
rs381648152
rs211455605
rs458394903
rs451402080
rs470051028
rs797749925
rs447353806
rs465890332
rs526678428
rs448669797
rs434259714
rs382227402
rs452821380
rs440866198
rs459226820
rs471364394
rs438690290
rs463639306
rs482091482
rs449135070
rs461120296
rs477256407
rs444164316
rs462688068
rs481081219
rs448025677
rs133207384
rs516984106
rs457496980
rs520770084
rs469710273
rs445408968
rs469432775
rs483119972
rs450692237
rs467586277
rs436272117
rs453210340
rs466525887
rs432000380
rs460890345
rs471281213
rs439535838
rs462973188
rs483085118
rs448634783
rs461122325
rs481309224
rs446699253
rs521046893
rs466852820
rs432278583
rs720573358
rs41974457
rs41974473
rs41974474
rs458957967
rs467511526
rs800675168
rs798895576
rs482246126
rs799341618
rs797501154
rs450781760
rs461291765
rs481372281
rs481372281
rs446639139
rs446639139
rs466562502
rs466562502
rs432068059
rs432068059
rs445676426
rs445676426
rs468884107
rs468884107
rs481045526
rs481045526
rs440591497
rs476573083
rs441914473
rs433469828
rs109316517
rs441121233
rs473643314
rs464193514
rs434667811
rs453180288
rs474917315
rs441773151
rs476719315
rs443729725
rs458771412
rs477257580
rs441172478
rs452466579
rs472916376
rs441455567
rs461517709
rs481386734
rs442499679
rs462510144
rs447291333
rs723462238
rs450034840
rs468119471
rs435188031
rs435235583
rs483096280
rs519608652
rs470279891
rs435393848
rs455367687
rs472156813
rs434655611
rs451460985
rs471397976
rs443191378
rs463455024
rs473919090
rs442293710
rs462349578
rs479168450
rs448003785
rs450056333
rs463756630
rs475859354
rs439773953
rs478659704
rs378669736
rs458345065
rs480102575
rs482739269
rs449859330
rs465170714
rs477334476
rs447593060
rs466906500
rs434004883
rs455588261
rs467676684
rs380372406
rs438059734
rs456564301
rs436358152
rs432658377
rs454446634
rs472892259
rs442416791
rs517108460
rs460948695
rs476260315
rs443382067
rs458675084
rs477266520
rs447474733
rs459611190
rs481142423
rs456544875
rs467645970
rs438053716
rs470686572
rs440962546
rs459481964
rs481079142
rs448339411
rs461160467
rs452811088
rs478944063
rs442625533
rs461169434
rs471625793
rs378504464
rs380606899
rs463488652
rs800040872
rs209543615
rs439251409
rs457711912
rs477772090
rs383843074
rs381341999
rs469674557
rs517062177
rs721376238
rs448591680
rs470138520
rs482110261
rs378027576
rs436783540
rs109094057
rs715614640
rs476468274
rs443569374
rs461908184
rs483098217
rs43722771
rs468740998
rs451149023
rs473132646
rs440227677
rs461810394
rs480195774
rs442137619
rs463856163
rs482337526
rs446029180
rs464491052
rs480146286
rs458162702
rs716602804
rs480170999
rs435063315
rs454888141
rs474809941
rs109007150
rs800649888
rs798927739
rs436554112
rs435243366
rs453695340
rs472136522
rs462468121
rs480883022
rs441401778
rs459901266
rs478395267
rs445317588
rs470044225
rs481605081
rs448622622
rs432724822
rs451517673
rs470073324
rs437019934
rs479159991
rs446078424
rs438251959
rs456424841
rs474791399
rs442111331
rs460617771
rs472685412
rs522490993
rs135192547
rs446316196
rs464663431
rs445334840
rs437981803
rs456356547
rs468543262
rs435648071
rs444077803
rs462535706
rs450248251
rs454276859
rs472710188
rs433246293
rs451797419
rs440977053
rs459508610
rs443435127
rs442660551
rs720384966
rs465605036
rs521529657
rs479056264
rs447563583
rs464494391
rs478170890
rs449839776
rs469972171
rs435234738
rs455314475
rs465575290
rs519439402
rs434381219
rs456531022
rs471274482
rs439893358
rs456674708
rs476876664
rs442101578
rs462273744
rs522982446
rs478993062
rs526519233
rs441210119
rs458155324
rs518910265
rs478101588
rs458092160
rs471813574
rs443511385
rs463653384
rs480564422
rs448967171
rs459385450
rs464580197
rs433140538
rs459775330
rs481685896
rs448558111
rs463898326
rs482363576
rs109790808
rs469690151
rs473405513
rs208279052
rs109256956
rs476865546
rs447322344
rs472362107
rs476453427
rs443448382
rs458695980
rs471585351
rs438792692
rs720837439
rs473117894
rs441801811
rs482100722
rs435234395
rs439014293
rs457574651
rs475849265
rs442904049
rs461314375
rs479842535
rs440426472
rs477158013
rs518255176
rs450552295
rs462593796
rs481125919
rs448111013
rs466712485
rs433554209
rs445702482
rs465661308
rs432644110
rs457486947
rs444428351
rs462667473
rs474967523
rs136685615
rs482601875
rs449746717
rs460568804
rs479182035
rs446019345
rs475360122
rs483050432
rs450078755
rs468399328
rs480572233
rs447358972
rs466013581
rs432822761
rs436715853
rs716561517
rs456742200
rs454226390
rs472837897
rs439724897
rs477805100
rs466514710
rs435088600
rs465345740
rs437168763
rs457405815
rs475123291
rs440529546
rs440529546
rs468178538
rs468178538
rs478730338
rs478730338
rs447404151
rs447404151
rs464324174
rs464324174
rs432958657
rs432958657
rs456385299
rs456385299
rs470097803
rs470097803
rs435521790
rs454902989
rs475037933
rs440461652
rs454086833
rs470960780
rs439759364
rs463026768
rs483302479
rs442317299
rs461729025
rs461729025
rs454326158
rs433998800
rs456176664
rs476183900
rs441908865
rs462087121
rs478929089
rs467350065
rs481094525
rs449536764
rs466452020
rs434933951
rs451830742
rs379514363
rs516289394
rs461644733
rs480099910
rs521318566
rs469198527
rs478093186
rs524892045
rs518349217
rs445088706
rs480938143
rs450896821
rs383940441
rs721677689
rs472123559
rs208980641
rs455176960
rs462580936
rs476348887
rs438355367
rs436414148
rs436812147
rs383036371
rs432123294
rs469207506
rs457260777
rs436455255
rs473605898
rs460255438
rs520916196
rs516493471
rs447450712
rs477851179
rs469842494
rs450392357
rs435765282
rs466102793
rs470390218
rs437329008
rs446183055
rs464623203
rs436280731
rs454676856
rs476190268
rs443358398
rs458493897
rs470471325
rs440799635
rs459345841
rs481815397
rs448751215
rs463951242
rs482430030
rs478343723
rs468283140
rs435521018
rs437996939
rs460322325
rs523158140
rs135483577
rs721515528
rs455137965
rs456690846
rs476958360
rs442267741
rs462124377
rs525969814
rs479102252
rs441157738
rs458112127
rs449954218
rs445825644
rs469166012
rs482997840
rs448320097
rs135878508
rs440019364
rs455844741
rs477213889
rs462631789
rs471421318
rs443994813
rs474487186
rs441612274
rs442560532
rs437935043
rs472054638
rs442473323
rs461418186
rs483010422
rs443944314
rs516857374
rs463025619
rs471581713
rs438590414
rs460416819
rs450214180
rs461847045
rs481840407
rs454135191
rs472849520
rs439745989
rs452048521
rs516011186
rs723308798
rs464530130
rs448541193
rs522231144
rs452176772
rs480706266
rs447699699
rs466354909
rs451611728
rs465152007
rs454130001
rs471045812
rs717113406
rs464549623
rs433109539
rs435905103
rs440866354
rs516514139
rs451334699
rs471317529
rs443135345
rs469658778
rs454219260
rs464167184
rs432928056
rs456211709
rs476306798
rs526838813
rs447689244
rs461286955
rs481340462
rs444486035
rs463536909
rs482043953
rs449231361
rs461230464
rs450529020
rs469579325
rs436567816
rs455106241
rs480713568
rs452475056
rs472780316
rs433017367
rs466849664
rs434737036
rs454930129
rs475052359
rs457405900
rs453141253
rs473264547
rs441932753
rs461695404
rs481907854
rs444090337
rs457631317
rs477717795
rs446171136
rs471621351
rs440154410
rs466995186
rs472034576
rs440546462
rs456764338
rs474592494
rs441675174
rs462648999
rs470938322
rs444113221
rs445200981
rs470186567
rs437248153
rs455676155
rs467752384
rs434941973
rs472397807
rs441317402
rs525199024
rs458221602
rs435499392
rs455473824
rs472434927
rs450529902
rs467315154
rs451217199
rs468038561
rs436600929
rs453473484
rs473608308
rs456585013
rs476646582
rs451098688
rs478171905
rs385493425
rs448369554
rs480454859
rs480454859
rs450745650
rs469287676
rs477805418
rs444814245
rs466456349
rs466456349
rs445093098
rs465244690
rs461960328
rs475666025
rs453479312
rs471932289
rs717669024
rs799139875
rs481083912
rs448202937
rs451938485
rs476836123
rs443787482
rs455761995
rs473733790
rs478792039
rs445736249
rs464178583
rs432584034
rs437668982
rs454958900
rs475263982
rs440687118
rs721833062
rs458957967
rs467511526
rs800675168
rs798895576
rs461291765
rs439626767
rs462802394
rs478900129
rs447461149
rs457897667
rs477920698
rs458845300
rs457099000
rs436491861
rs456595634
rs476625648
rs438852833
rs437008491
rs450125344
rs520750012
rs714132458
rs465508980
rs432526839
rs454268600
rs472892660
rs460449726
rs434683718
rs453143868
rs480399693
rs441069804
rs459373475
rs477983272
rs444750627
rs516193130
rs475450683
rs439199024
rs474316920
rs379019464
rs448112257
rs452654117
rs522835790
rs210132888
rs449167194
rs468322037
rs435433062
rs453890918
rs521300256
rs454155021
rs473190685
rs433731117
rs435740642
rs462036920
rs474133834
rs439108795
rs457697282
rs471376487
rs443273401
rs463447618
rs480390600
rs438273771
rs455256602
rs475288931
rs442457711
rs452822219
rs473103242
rs438471089
rs458753878
rs481982184
rs444230896
rs461297784
rs457205378
rs474103601
rs449913849
rs523881739
rs463555809
rs480501603
rs448880745
rs515978086
rs465663072
rs434468931
rs444751174
rs464932592
rs441345866
rs434076047
rs446297956
rs464823041
rs431941760
rs447350328
rs465795553
rs476396991
rs433467712
rs797625027
rs449639507
rs458465489
rs460469400
rs438267587
rs432926009
rs435890218
rs443007346
rs459875800
rs480215338
rs444790613
rs464930756
rs432282775
rs451652910
rs451366668
rs451936516
rs458669520
rs526242226
rs441790598
rs478703839
rs439341683
rs448553645
rs442166180
rs460759488
rs479094921
rs458108331
rs451342205
rs449721776
rs463443180
rs480910227
rs445526538
rs460558928
rs477423465
rs439820718
rs463088231
rs483351105
rs448053211
rs448053211
rs435521790
rs454902989
rs475037933
rs440461652
rs454086833
rs470960780
rs442317299
rs454039269
rs470948778
rs439622646
rs137716256
rs465293039
rs437209041
rs457387408
rs450524202
rs475195499
rs443881756
rs436331164
rs468902155
rs716017742
rs434782032
rs453234263
rs135930835
rs472524337
rs445261754
rs470115624
rs437133286
rs455592409
rs717661582
rs434276652
rs455948057
rs461162014
rs482944245
rs456349159
rs383888905
rs438345478
rs453799397
rs451223603
rs207829955
rs382388531
rs480479396
rs441022360
rs461123334
rs378304784
rs455565243
rs437480653
rs457443391
rs433962559
rs434053279
rs211359618
rs447815682
rs455844007
rs472868008
rs483315266
rs444655049
rs448380039
rs468599425
rs434028650
rs109462250
rs443069875
rs463016346
rs476574836
rs438868336
rs459001471
rs479147536
rs479446766
rs446455722
rs527188487
rs462302815
rs522984380
rs446711191
rs435568238
rs455766561
rs475904933
rs460874104
rs474480147
rs443070258
rs462812765
rs468739756
rs435743296
rs444318114
rs470938322
rs444497615
rs462828661
rs462714904
rs481284131
rs441857004
rs133988074
rs453415255
rs472102044
rs439103821
rs456883153
rs475412026
rs468641810
rs472006534
rs516014136
rs469415209
rs450745650
rs469287676
rs477805418
rs444814245
rs480337986
rs448978395
rs462699062
rs482810551
rs444336716
rs457950680
rs444864165
rs464780879
rs720892828
rs799439911
rs797939419
rs467169198
rs469006189
rs466380763
rs452002552
rs475261647
rs454588466
rs378184310
rs434467411
rs482246126
rs799341618
rs797501154
rs450781760
rs454109370
rs470889289
rs462009628
rs518115703
rs467546527
rs525175244
rs459589006
rs479577983
rs445319179
rs465270567
rs458424573
rs478284703
rs436700829
rs454510623
rs476247953
rs443320667
rs458682455
rs520739577
rs468438074
rs453769587
rs208131360
rs449894115
rs452341312
rs470861209
rs468749593
rs134756375
rs443651990
rs433455703
rs456821331
rs476820905
rs435813492
rs455946744
rs472659759
rs454177120
rs436195111
rs454683892
rs451767588
rs519914243
rs476284669
rs443267249
rs517405627
rs460355881
rs439776379
rs469598597
rs449490612
rs460558928
rs477423465
rs439820718
rs463088231
rs483351105
rs439759364
rs463026768
rs483302479
rs474201197
rs380636731
rs478985812
rs525626025
rs378202959
rs382667897
rs475153554
rs469279334
rs437860195
rs454456140
rs474579220
rs433559601
rs453868179
rs460189731
rs450415677
rs433044593
rs479454440
rs447130486
rs465662285
rs477627257
rs451149332
rs469600405
rs436446922
rs455038443
rs466944838
rs434020222
rs453172786
rs471700938
rs461049036
rs479447705
rs440025014
rs382117533
rs433582479
rs453487598
rs473650323
rs442167232
rs470669395
rs439863837
rs464245110
rs518429713
rs110817643
rs481937675
rs134036560
rs438682721
rs456938611
rs453899455
rs475416736
rs442430134

## Sheet: SCS
SNP_ID	refNCBI	refUCSC	Allele	Chromosome	chromStart	chromEnd	Pre_miRNA_ID	Pre-miRNA	Strand position of pre-miRNA	Start position of pre-miRNA	End position of pre-miRNA	Position in_pre-miRNA	Name of Mature_sequence	Position in_mature_sequence	inseed	QTL-1	Number of QTL(#)	QTL-2	Number of QTL(#)
rs132996997	T	T	C/T	1	99671700	99671701	MI0009864	bta-mir-551b	-	99671696	99671790	90				Somatic Cell Score	10125
rs135711811	A	A	A/G	1	99671782	99671783	MI0009864	bta-mir-551b	-	99671696	99671790	8				Somatic Cell Score	10125
rs466432510	T	T	G/T	10	42712642	42712643	MI0022268	bta-mir-6517	+	42712635	42712712	9				Somatic Cell Score	3436
rs453829922	A	A	A/T	10	42712669	42712670	MI0022268	bta-mir-6517	+	42712635	42712712	36				Somatic Cell Score	3436
rs472386829	G	G	G/T	10	42712674	42712675	MI0022268	bta-mir-6517	+	42712635	42712712	41				Somatic Cell Score	3436
rs439387933	C	C	C/G	10	42712679	42712680	MI0022268	bta-mir-6517	+	42712635	42712712	46				Somatic Cell Score	3436
rs451392160	T	T	C/T	10	42712698	42712699	MI0022268	bta-mir-6517	+	42712635	42712712	65				Somatic Cell Score	3436
rs476319348	G	G	C/G	10	42712702	42712703	MI0022268	bta-mir-6517	+	42712635	42712712	69				Somatic Cell Score	3436
rs443228538	G	G	C/G/T	10	42712703	42712704	MI0022268	bta-mir-6517	+	42712635	42712712	70				Somatic Cell Score	3436
rs461768487	G	G	G/T	10	42712707	42712708	MI0022268	bta-mir-6517	+	42712635	42712712	74				Somatic Cell Score	3436
rs445176346	T	T	G/T	10	55017760	55017761	MI0009878	bta-mir-628	+	55017684	55017778	78				Somatic Cell Score	3436
rs475278157	G	G	G/T	10	55017771	55017772	MI0009878	bta-mir-628	+	55017684	55017778	89				Somatic Cell Score	3436
rs520834664	A	A	A/G	10	58120483	58120484	MI0010483	bta-mir-1248-2	+	58120391	58120495	94				Somatic Cell Score	3436
rs517541614	A	A	A/G	13	39836902	39836903	MI0011318	bta-mir-2305	+	39836873	39836938	31				Somatic Cell Score	4983
rs41686132	A	A	G/T	13	39836924	39836925	MI0011318	bta-mir-2305	+	39836873	39836938	53				Somatic Cell Score	4983
rs432326926	A	A	A/C	13	55227294	55227295	MI0025193	bta-mir-133c	+	55227289	55227382	7				Somatic Cell Score	2775
rs432326926	A	A	A/C	13	55227294	55227295	MI0009733	bta-mir-133a-1	-	55227292	55227386	92				Somatic Cell Score	2775
rs454296478	A	A	A/T	13	55227295	55227296	MI0025193	bta-mir-133c	+	55227289	55227382	8				Somatic Cell Score	2775
rs454296478	A	A	A/T	13	55227295	55227296	MI0009733	bta-mir-133a-1	-	55227292	55227386	91				Somatic Cell Score	2775
rs472904666	G	G	C/G	13	55227302	55227303	MI0025193	bta-mir-133c	+	55227289	55227382	15				Somatic Cell Score	2775
rs472904666	G	G	C/G	13	55227302	55227303	MI0009733	bta-mir-133a-1	-	55227292	55227386	84				Somatic Cell Score	2775
rs436591897	C	C	C/G	13	55227303	55227304	MI0025193	bta-mir-133c	+	55227289	55227382	16				Somatic Cell Score	2775
rs436591897	C	C	C/G	13	55227303	55227304	MI0009733	bta-mir-133a-1	-	55227292	55227386	83				Somatic Cell Score	2775
rs455074531	T	T	A/T	13	55227304	55227305	MI0025193	bta-mir-133c	+	55227289	55227382	17				Somatic Cell Score	2775
rs455074531	T	T	A/T	13	55227304	55227305	MI0009733	bta-mir-133a-1	-	55227292	55227386	82				Somatic Cell Score	2775
rs476836013	A	A	A/T	13	55227338	55227339	MI0025193	bta-mir-133c	+	55227289	55227382	51				Somatic Cell Score	2775
rs476836013	A	A	A/T	13	55227338	55227339	MI0009733	bta-mir-133a-1	-	55227292	55227386	48				Somatic Cell Score	2775
rs444186133	A	A	A/C	13	55227343	55227344	MI0025193	bta-mir-133c	+	55227289	55227382	56				Somatic Cell Score	2775
rs444186133	A	A	A/C	13	55227343	55227344	MI0009733	bta-mir-133a-1	-	55227292	55227386	43				Somatic Cell Score	2775
rs462631789	C	C	C/T	13	55227360	55227361	MI0009733	bta-mir-133a-1	-	55227292	55227386	26				Somatic Cell Score	2775
rs471421318	G	G	G/T	13	55227362	55227363	MI0009733	bta-mir-133a-1	-	55227292	55227386	24				Somatic Cell Score	2775
rs438391142	C	C	C/G	13	55227382	55227383	MI0025193	bta-mir-133c	+	55227289	55227382	95				Somatic Cell Score	2775
rs438391142	C	C	C/G	13	55227382	55227383	MI0009733	bta-mir-133a-1	-	55227292	55227386	4				Somatic Cell Score	2775
rs446686958	A	A	A/G	14	1566946	1566947	MI0011321	bta-mir-2308	+	1566933	1567001	15				Somatic Cell Score	3517
rs468634556	C	C	A/C	14	1566950	1566951	MI0011321	bta-mir-2308	+	1566933	1567001	19				Somatic Cell Score	3517
rs435599312	C	C	C/T	14	1566952	1566953	MI0011321	bta-mir-2308	+	1566933	1567001	21				Somatic Cell Score	3517
rs450842156	T	T	G/T	14	1566958	1566959	MI0011321	bta-mir-2308	+	1566933	1567001	27				Somatic Cell Score	3517
rs469457748	C	C	C/G	14	1566962	1566963	MI0011321	bta-mir-2308	+	1566933	1567001	31				Somatic Cell Score	3517
rs433205672	C	C	A/C	14	1566963	1566964	MI0011321	bta-mir-2308	+	1566933	1567001	32				Somatic Cell Score	3517
rs451830565	C	C	A/C/G	14	1566966	1566967	MI0011321	bta-mir-2308	+	1566933	1567001	35				Somatic Cell Score	3517
rs473398379	T	T	G/T	14	1566968	1566969	MI0011321	bta-mir-2308	+	1566933	1567001	37				Somatic Cell Score	3517
rs517147823	G	G	A/G	14	1883852	1883853	MI0010473	bta-mir-1839	-	1883846	1883917	65				Somatic Cell Score	3517
rs472719293	T	T	A/T	14	1883863	1883864	MI0010473	bta-mir-1839	-	1883846	1883917	54				Somatic Cell Score	3517
rs470978040	G	G	C/G	14	1883867	1883868	MI0010473	bta-mir-1839	-	1883846	1883917	50				Somatic Cell Score	3517
rs210217220	A	A	A/T	14	1883871	1883872	MI0010473	bta-mir-1839	-	1883846	1883917	46				Somatic Cell Score	3517
rs459817959	A	A	A/G	14	1883875	1883876	MI0010473	bta-mir-1839	-	1883846	1883917	42				Somatic Cell Score	3517
rs208524348	A	A	A/C	14	1883887	1883888	MI0010473	bta-mir-1839	-	1883846	1883917	30				Somatic Cell Score	3517
rs449890665	T	T	C/T	14	1883912	1883913	MI0010473	bta-mir-1839	-	1883846	1883917	5				Somatic Cell Score	3517
rs465137753	C	C	A/C	14	1883913	1883914	MI0010473	bta-mir-1839	-	1883846	1883917	4				Somatic Cell Score	3517
rs466224754	C	C	C/G	14	2071853	2071854	MI0011322	bta-mir-2309	+	2071851	2071925	4				Somatic Cell Score	3517
rs433766413	A	A	A/G	14	2071854	2071855	MI0011322	bta-mir-2309	+	2071851	2071925	5				Somatic Cell Score	3517
rs455576664	A	A	A/G	14	2071857	2071858	MI0011322	bta-mir-2309	+	2071851	2071925	8				Somatic Cell Score	3517
rs467561672	T	T	G/T	14	2071860	2071861	MI0011322	bta-mir-2309	+	2071851	2071925	11				Somatic Cell Score	3517
rs459152382	T	T	G/T	14	2071884	2071885	MI0011322	bta-mir-2309	+	2071851	2071925	35				Somatic Cell Score	3517
rs477449512	G	G	A/G	14	2071885	2071886	MI0011322	bta-mir-2309	+	2071851	2071925	36				Somatic Cell Score	3517
rs447544252	G	G	A/G	14	2071887	2071888	MI0011322	bta-mir-2309	+	2071851	2071925	38				Somatic Cell Score	3517
rs438022476	C	C	A/C	14	2071888	2071889	MI0011322	bta-mir-2309	+	2071851	2071925	39				Somatic Cell Score	3517
rs466163206	A	A	A/T	14	2071889	2071890	MI0011322	bta-mir-2309	+	2071851	2071925	40				Somatic Cell Score	3517
rs481557370	G	G	C/G	14	2071891	2071892	MI0011322	bta-mir-2309	+	2071851	2071925	42				Somatic Cell Score	3517
rs448583907	T	T	C/G/T	14	2071892	2071893	MI0011322	bta-mir-2309	+	2071851	2071925	43				Somatic Cell Score	3517
rs467600474	G	G	G/T	14	2071896	2071897	MI0011322	bta-mir-2309	+	2071851	2071925	47				Somatic Cell Score	3517
rs437760390	C	C	C/T	14	2071904	2071905	MI0011322	bta-mir-2309	+	2071851	2071925	55				Somatic Cell Score	3517
rs456436802	A	A	A/C/T	14	2071912	2071913	MI0011322	bta-mir-2309	+	2071851	2071925	63				Somatic Cell Score	3517
rs440781924	G	G	A/G	14	4030348	4030349	MI0004738	bta-mir-151	+	4030319	4030387	31				Somatic Cell Score	3517
rs455723809	T	T	G/T	14	4030349	4030350	MI0004738	bta-mir-151	+	4030319	4030387	32				Somatic Cell Score	3517
rs474220030	C	C	A/C/T	14	4030350	4030351	MI0004738	bta-mir-151	+	4030319	4030387	33				Somatic Cell Score	3517
rs444508374	A	A	A/C	14	4030360	4030361	MI0004738	bta-mir-151	+	4030319	4030387	43				Somatic Cell Score	3517
rs468387463	T	T	C/G/T	15	22134725	22134726	MI0004763	bta-mir-34b	+	22134725	22134808	2				Somatic Cell Score	3416
rs435733161	T	T	G/T	15	22134732	22134733	MI0004763	bta-mir-34b	+	22134725	22134808	9				Somatic Cell Score	3416
rs476930339	A	A	A/C	15	22134760	22134761	MI0004763	bta-mir-34b	+	22134725	22134808	37				Somatic Cell Score	3416
rs443920242	G	G	A/G	15	22134768	22134769	MI0004763	bta-mir-34b	+	22134725	22134808	45				Somatic Cell Score	3416
rs797407921	C	C	A/C	15	22134773	22134774	MI0004763	bta-mir-34b	+	22134725	22134808	50				Somatic Cell Score	3416
rs462592614	A	A	A/G	15	22134775	22134776	MI0004763	bta-mir-34b	+	22134725	22134808	52				Somatic Cell Score	3416
rs481068239	C	C	A/C	15	22134791	22134792	MI0004763	bta-mir-34b	+	22134725	22134808	68				Somatic Cell Score	3416
rs441714093	A	A	A/G	15	22134802	22134803	MI0004763	bta-mir-34b	+	22134725	22134808	79				Somatic Cell Score	3416
rs432765279	T	T	A/T	15	22135433	22135434	MI0005068	bta-mir-34c	+	22135426	22135502	9				Somatic Cell Score	3416
rs469602761	C	C	C/T	15	22135482	22135483	MI0005068	bta-mir-34c	+	22135426	22135502	58				Somatic Cell Score	3416
rs436928873	G	G	G/T	15	22135485	22135486	MI0005068	bta-mir-34c	+	22135426	22135502	61				Somatic Cell Score	3416
rs520405038	G	G	G/T	15	30727317	30727318	MI0022279	bta-mir-378b	+	30727297	30727394	22				Somatic Cell Score	2678
rs718747050	T	T	A/T	15	30727349	30727350	MI0022279	bta-mir-378b	+	30727297	30727394	54				Somatic Cell Score	2678
rs208947946	G	G	G/T	15	30727353	30727354	MI0022279	bta-mir-378b	+	30727297	30727394	58				Somatic Cell Score	2678
rs439219486	G	G	C/G	18	8166060	8166061	MI0013056	bta-mir-2883	+	8166056	8166120	6				Somatic Cell Score	3554
rs439199736	C	C	A/C	18	8166068	8166069	MI0013056	bta-mir-2883	+	8166056	8166120	14				Somatic Cell Score	3554
rs458016270	A	A	A/G	18	8166084	8166085	MI0013056	bta-mir-2883	+	8166056	8166120	30				Somatic Cell Score	3554
rs473342059	T	T	G/T	18	8166090	8166091	MI0013056	bta-mir-2883	+	8166056	8166120	36				Somatic Cell Score	3554
rs440223012	C	C	C/T	18	8166094	8166095	MI0013056	bta-mir-2883	+	8166056	8166120	40				Somatic Cell Score	3554
rs463835237	G	G	A/C/G/T	18	8166117	8166118	MI0013056	bta-mir-2883	+	8166056	8166120	63				Somatic Cell Score	3554
rs478940701	A	A	A/G/T	18	11939473	11939474	MI0011350	bta-mir-2325a	-	11939464	11939538	65				Somatic Cell Score	3554
rs481594709	C	C	C/G	18	11939501	11939502	MI0011350	bta-mir-2325a	-	11939464	11939538	37				Somatic Cell Score	3554
rs450174834	G	G	C/G	18	11939504	11939505	MI0011350	bta-mir-2325a	-	11939464	11939538	34				Somatic Cell Score	3554
rs470184534	A	A	A/C	18	11939505	11939506	MI0011350	bta-mir-2325a	-	11939464	11939538	33				Somatic Cell Score	3554
rs477448557	G	G	G/T	18	11939523	11939524	MI0011350	bta-mir-2325a	-	11939464	11939538	15				Somatic Cell Score	3554
rs446050465	A	A	A/T	18	11939529	11939530	MI0011350	bta-mir-2325a	-	11939464	11939538	9				Somatic Cell Score	3554
rs466500550	T	T	C/T	18	11939533	11939534	MI0011350	bta-mir-2325a	-	11939464	11939538	5				Somatic Cell Score	3554
rs435050840	C	C	C/T	18	11939535	11939536	MI0011350	bta-mir-2325a	-	11939464	11939538	3				Somatic Cell Score	3554
rs456687317	G	G	C/G	18	14003575	14003576	MI0011352	bta-mir-2327	+	14003563	14003632	14				Somatic Cell Score	3554
rs475997737	C	C	C/G	18	14003582	14003583	MI0011352	bta-mir-2327	+	14003563	14003632	21				Somatic Cell Score	3554
rs438412990	C	C	A/C	18	14003597	14003598	MI0011352	bta-mir-2327	+	14003563	14003632	36				Somatic Cell Score	3554
rs208923471	G	G	C/G	18	14003631	14003632	MI0011352	bta-mir-2327	+	14003563	14003632	70				Somatic Cell Score	3554
rs450084019	C	C	A/C	18	24992700	24992701	MI0005029	bta-mir-138-2	+	24992697	24992779	5				Somatic Cell Score	18469
rs468617460	G	G	C/G	18	24992702	24992703	MI0005029	bta-mir-138-2	+	24992697	24992779	7				Somatic Cell Score	18469
rs433386385	A	A	A/C	18	24992730	24992731	MI0005029	bta-mir-138-2	+	24992697	24992779	35				Somatic Cell Score	18469
rs451914028	C	C	C/G	18	24992732	24992733	MI0005029	bta-mir-138-2	+	24992697	24992779	37				Somatic Cell Score	18469
rs520661050	-	-	-/AA	18	24992733	24992733	MI0005029	bta-mir-138-2	+	24992697	24992779	37				Somatic Cell Score	18469
rs525598757	-	-	-/A	18	24992737	24992737	MI0005029	bta-mir-138-2	+	24992697	24992779	41				Somatic Cell Score	18469
rs470451202	A	A	A/C	18	24992738	24992739	MI0005029	bta-mir-138-2	+	24992697	24992779	43				Somatic Cell Score	18469
rs437501247	A	A	A/C	18	24992746	24992747	MI0005029	bta-mir-138-2	+	24992697	24992779	51				Somatic Cell Score	18469
rs455161708	T	T	C/T	18	24992757	24992758	MI0005029	bta-mir-138-2	+	24992697	24992779	62				Somatic Cell Score	18469
rs524829560	C	C	C/T	18	24992760	24992761	MI0005029	bta-mir-138-2	+	24992697	24992779	65				Somatic Cell Score	18469
rs473609227	G	G	G/T	18	24992768	24992769	MI0005029	bta-mir-138-2	+	24992697	24992779	73				Somatic Cell Score	18469
rs380764141	A	A	A/G	18	25103681	25103682	MI0021130	bta-mir-2285g-1	+	25103670	25103730	13				Somatic Cell Score	18469
rs382891649	C	C	C/T	18	25103693	25103694	MI0021130	bta-mir-2285g-1	+	25103670	25103730	25				Somatic Cell Score	18469
rs714402541	C	C	C/T	18	25148157	25148158	MI0022284	bta-mir-2285n-3	+	25148117	25148192	42				Somatic Cell Score	18469
rs518170579	A	A	A/G	18	26729690	26729691	MI0022285	bta-mir-2285n-4	-	26729655	26729740	50				Somatic Cell Score	18469
rs449050053	A	A	A/G	18	34957612	34957613	MI0009800	bta-mir-328	-	34957610	34957701	89				Somatic Cell Score	9904
rs466274146	G	G	G/T	18	34957616	34957617	MI0009800	bta-mir-328	-	34957610	34957701	85				Somatic Cell Score	9904
rs434871154	G	G	C/G	18	34957618	34957619	MI0009800	bta-mir-328	-	34957610	34957701	83				Somatic Cell Score	9904
rs474292110	A	A	A/G	18	34957645	34957646	MI0009800	bta-mir-328	-	34957610	34957701	56				Somatic Cell Score	9904
rs443022732	C	C	C/G	18	34957647	34957648	MI0009800	bta-mir-328	-	34957610	34957701	54				Somatic Cell Score	9904
rs453477024	C	C	C/G	18	34957649	34957650	MI0009800	bta-mir-328	-	34957610	34957701	52				Somatic Cell Score	9904
rs472320870	A	A	A/G	18	34957650	34957651	MI0009800	bta-mir-328	-	34957610	34957701	51				Somatic Cell Score	9904
rs440846288	A	A	A/C	18	34957652	34957653	MI0009800	bta-mir-328	-	34957610	34957701	49				Somatic Cell Score	9904
rs457665260	C	C	C/G	18	34957668	34957669	MI0009800	bta-mir-328	-	34957610	34957701	33				Somatic Cell Score	9904
rs520651881	C	C	-/C	18	34957675	34957676	MI0009800	bta-mir-328	-	34957610	34957701	26				Somatic Cell Score	9904
rs471363637	C	C	C/T	18	34957676	34957677	MI0009800	bta-mir-328	-	34957610	34957701	25				Somatic Cell Score	9904
rs443559300	C	C	C/G	18	34957692	34957693	MI0009800	bta-mir-328	-	34957610	34957701	9				Somatic Cell Score	9904
rs463682620	A	A	A/C	18	34957699	34957700	MI0009800	bta-mir-328	-	34957610	34957701	2				Somatic Cell Score	9904
rs480512306	G	G	G/T	18	34957700	34957701	MI0009800	bta-mir-328	-	34957610	34957701	1				Somatic Cell Score	9904
rs516346319	-	-	-/G	18	37088156	37088156	MI0005010	bta-mir-140	+	37088137	37088230	20				Somatic Cell Score	9904
rs457631339	C	C	A/C	18	37088163	37088164	MI0005010	bta-mir-140	+	37088137	37088230	28				Somatic Cell Score	9904
rs477715882	C	C	C/T	18	37088164	37088165	MI0005010	bta-mir-140	+	37088137	37088230	29				Somatic Cell Score	9904
rs449766878	T	T	G/T	18	37088171	37088172	MI0005010	bta-mir-140	+	37088137	37088230	36				Somatic Cell Score	9904
rs470018404	T	T	G/T	18	37088175	37088176	MI0005010	bta-mir-140	+	37088137	37088230	40				Somatic Cell Score	9904
rs435406951	A	A	A/T	18	37088177	37088178	MI0005010	bta-mir-140	+	37088137	37088230	42				Somatic Cell Score	9904
rs449151810	C	C	C/G	18	37088185	37088186	MI0005010	bta-mir-140	+	37088137	37088230	50				Somatic Cell Score	9904
rs466108135	T	T	C/T	18	37088186	37088187	MI0005010	bta-mir-140	+	37088137	37088230	51				Somatic Cell Score	9904
rs433286431	A	A	A/C	18	37088214	37088215	MI0005010	bta-mir-140	+	37088137	37088230	79				Somatic Cell Score	9904
rs480550119	G	G	C/G	18	39351758	39351759	MI0011353	bta-mir-2328	+	39351757	39351834	3				Somatic Cell Score	9904
rs448955788	T	T	C/T	18	39351763	39351764	MI0011353	bta-mir-2328	+	39351757	39351834	8				Somatic Cell Score	9904
rs465994943	C	C	C/G	18	39351764	39351765	MI0011353	bta-mir-2328	+	39351757	39351834	9				Somatic Cell Score	9904
rs456522861	G	G	G/T	18	39351788	39351789	MI0011353	bta-mir-2328	+	39351757	39351834	33				Somatic Cell Score	9904
rs470446851	T	T	C/T	18	39351793	39351794	MI0011353	bta-mir-2328	+	39351757	39351834	38				Somatic Cell Score	9904
rs463384003	G	G	A/G	18	39351830	39351831	MI0011353	bta-mir-2328	+	39351757	39351834	75				Somatic Cell Score	9904
rs480538282	C	C	C/G	18	39351833	39351834	MI0011353	bta-mir-2328	+	39351757	39351834	78				Somatic Cell Score	9904
rs456301210	G	G	C/G	18	40433028	40433029	MI0013076	bta-mir-2901	+	40433025	40433107	5				Somatic Cell Score	9904
rs476345508	T	T	C/T	18	40433033	40433034	MI0013076	bta-mir-2901	+	40433025	40433107	10				Somatic Cell Score	9904
rs441577719	C	C	A/C	18	40433034	40433035	MI0013076	bta-mir-2901	+	40433025	40433107	11				Somatic Cell Score	9904
rs461798880	G	G	C/G	18	40433036	40433037	MI0013076	bta-mir-2901	+	40433025	40433107	13				Somatic Cell Score	9904
rs478746938	G	G	G/T	18	40433038	40433039	MI0013076	bta-mir-2901	+	40433025	40433107	15				Somatic Cell Score	9904
rs440895259	A	A	A/G	18	40433042	40433043	MI0013076	bta-mir-2901	+	40433025	40433107	19				Somatic Cell Score	9904
rs460698575	G	G	C/G	18	40433070	40433071	MI0013076	bta-mir-2901	+	40433025	40433107	47				Somatic Cell Score	9904
rs477618360	T	T	G/T	18	40433076	40433077	MI0013076	bta-mir-2901	+	40433025	40433107	53				Somatic Cell Score	9904
rs446289075	T	T	C/T	18	40433079	40433080	MI0013076	bta-mir-2901	+	40433025	40433107	56				Somatic Cell Score	9904
rs464177145	T	T	G/T	18	42198080	42198081	MI0013074	bta-mir-2899	+	42198046	42198113	36				Somatic Cell Score	9904
rs41885631	A	A	G/T	18	48594054	48594055	MI0011355	bta-mir-2329-2	+	48594020	48594085	36				Somatic Cell Score	18471
rs41885631	A	A	G/T	18	48594054	48594055	MI0011354	bta-mir-2329-1	-	48594020	48594085	31				Somatic Cell Score	18471
rs477872416	T	T	A/T	18	53945882	53945883	MI0009898	bta-mir-769	+	53945876	53945994	8				Somatic Cell Score	3622
rs524412685	G	G	A/G	18	53945883	53945884	MI0009898	bta-mir-769	+	53945876	53945994	9				Somatic Cell Score	3622
rs210343727	C	C	C/T	18	53945895	53945896	MI0009898	bta-mir-769	+	53945876	53945994	21				Somatic Cell Score	3622
rs446469426	T	T	A/T	18	53945905	53945906	MI0009898	bta-mir-769	+	53945876	53945994	31				Somatic Cell Score	3622
rs466447339	A	A	A/T	18	53945949	53945950	MI0009898	bta-mir-769	+	53945876	53945994	75				Somatic Cell Score	3622
rs435117271	G	G	A/G	18	53945985	53945986	MI0009898	bta-mir-769	+	53945876	53945994	111				Somatic Cell Score	3622
rs449973878	A	A	A/G	18	54224767	54224768	MI0013072	bta-mir-2897	+	54224747	54224815	22				Somatic Cell Score	3622
rs469994220	C	C	C/G	18	54224770	54224771	MI0013072	bta-mir-2897	+	54224747	54224815	25				Somatic Cell Score	3622
rs432109855	C	C	C/T	18	54224787	54224788	MI0013072	bta-mir-2897	+	54224747	54224815	42				Somatic Cell Score	3622
rs445769489	C	C	A/C	18	54224792	54224793	MI0013072	bta-mir-2897	+	54224747	54224815	47				Somatic Cell Score	3622
rs465929568	A	A	A/C/G	18	54224793	54224794	MI0013072	bta-mir-2897	+	54224747	54224815	48				Somatic Cell Score	3622
rs434471907	T	T	G/T	18	54224796	54224797	MI0013072	bta-mir-2897	+	54224747	54224815	51				Somatic Cell Score	3622
rs454546658	A	A	A/C	18	54224797	54224798	MI0013072	bta-mir-2897	+	54224747	54224815	52				Somatic Cell Score	3622
rs468125695	G	G	A/G	18	54224798	54224799	MI0013072	bta-mir-2897	+	54224747	54224815	53				Somatic Cell Score	3622
rs436681037	T	T	G/T	18	54224803	54224804	MI0013072	bta-mir-2897	+	54224747	54224815	58				Somatic Cell Score	3622
rs471067312	G	G	A/G	18	56285103	56285104	MI0011356	bta-mir-2330	-	56285098	56285175	72				Somatic Cell Score	3622
rs464915577	A	A	A/G	18	56285127	56285128	MI0011356	bta-mir-2330	-	56285098	56285175	48				Somatic Cell Score	3622
rs477152749	A	A	A/C/T	18	56285138	56285139	MI0011356	bta-mir-2330	-	56285098	56285175	37				Somatic Cell Score	3622
rs467089971	T	T	G/T	18	56285169	56285170	MI0011356	bta-mir-2330	-	56285098	56285175	6				Somatic Cell Score	3622
rs433998235	A	A	A/C	18	56285171	56285172	MI0011356	bta-mir-2330	-	56285098	56285175	4				Somatic Cell Score	3622
rs452391752	C	C	A/C	18	56285174	56285175	MI0011356	bta-mir-2330	-	56285098	56285175	1				Somatic Cell Score	3622
rs473423225	C	C	C/T	19	8714911	8714912	MI0031501	bta-mir-378d	-	8714871	8714961	50				Somatic Cell Score	3623
rs440515974	C	C	C/T	19	8714914	8714915	MI0031501	bta-mir-378d	-	8714871	8714961	47				Somatic Cell Score	3623
rs456020882	G	G	G/T	19	8714918	8714919	MI0031501	bta-mir-378d	-	8714871	8714961	43				Somatic Cell Score	3623
rs479761568	C	C	A/C	19	9527306	9527307	MI0005011	bta-mir-142	-	9527305	9527391	85				Somatic Cell Score	3623
rs446759815	A	A	A/C	19	9527307	9527308	MI0005011	bta-mir-142	-	9527305	9527391	84				Somatic Cell Score	3623
rs468413588	T	T	G/T	19	9527378	9527379	MI0005011	bta-mir-142	-	9527305	9527391	13				Somatic Cell Score	3623
rs797365654	A	A	A/T	19	10339931	10339932	MI0009840	bta-mir-454	-	10339845	10339958	27				Somatic Cell Score	3623
rs432380120	A	A	A/C	19	10349513	10349514	MI0009789	bta-mir-301a	-	10349506	10349590	77				Somatic Cell Score	3623
rs441391394	G	G	C/G	19	10349543	10349544	MI0009789	bta-mir-301a	-	10349506	10349590	47				Somatic Cell Score	3623
rs461561514	T	T	C/T	19	10349545	10349546	MI0009789	bta-mir-301a	-	10349506	10349590	45				Somatic Cell Score	3623
rs475270775	G	G	G/T	19	10349546	10349547	MI0009789	bta-mir-301a	-	10349506	10349590	44				Somatic Cell Score	3623
rs443963360	G	G	G/T	19	10349561	10349562	MI0009789	bta-mir-301a	-	10349506	10349590	29				Somatic Cell Score	3623
rs464081103	G	G	C/G	19	10349575	10349576	MI0009789	bta-mir-301a	-	10349506	10349590	15				Somatic Cell Score	3623
rs518830150	-	-	-/AG	19	10349578	10349578	MI0009789	bta-mir-301a	-	10349506	10349590	12				Somatic Cell Score	3623
rs482597761	T	T	A/C/T	19	10349578	10349579	MI0009789	bta-mir-301a	-	10349506	10349590	12				Somatic Cell Score	3623
rs444887971	T	T	G/T	19	10349582	10349583	MI0009789	bta-mir-301a	-	10349506	10349590	8				Somatic Cell Score	3623
rs458574655	T	T	A/T	19	10349583	10349584	MI0009789	bta-mir-301a	-	10349506	10349590	7				Somatic Cell Score	3623
rs478756905	T	T	G/T	19	10349589	10349590	MI0009789	bta-mir-301a	-	10349506	10349590	1				Somatic Cell Score	3623
rs464361766	T	T	G/T	19	15308150	15308151	MI0011357	bta-mir-2331	+	15308148	15308218	4				Somatic Cell Score	3623
rs437288242	A	A	A/C	19	15308194	15308195	MI0011357	bta-mir-2331	+	15308148	15308218	48				Somatic Cell Score	3623
rs439384590	C	C	C/G	19	18581999	18582000	MI0011358	bta-mir-2332	+	18581961	18582029	40				Somatic Cell Score	10446
rs522924345	-	-	-/GA	19	18582028	18582028	MI0011358	bta-mir-2332	+	18581961	18582029	68				Somatic Cell Score	10446
rs466227363	G	G	A/G	19	18582028	18582029	MI0011358	bta-mir-2332	+	18581961	18582029	69				Somatic Cell Score	10446
rs455701634	C	C	A/C	19	18811262	18811263	MI0009812	bta-mir-365-2	-	18811262	18811372	110				Somatic Cell Score	10446
rs475970114	A	A	A/C	19	18811271	18811272	MI0009812	bta-mir-365-2	-	18811262	18811372	101				Somatic Cell Score	10446
rs444527782	T	T	C/T	19	18811273	18811274	MI0009812	bta-mir-365-2	-	18811262	18811372	99				Somatic Cell Score	10446
rs451756786	A	A	A/C	19	18811280	18811281	MI0009812	bta-mir-365-2	-	18811262	18811372	92				Somatic Cell Score	10446
rs460283394	C	C	A/C	19	18811314	18811315	MI0009812	bta-mir-365-2	-	18811262	18811372	58				Somatic Cell Score	10446
rs480273288	A	A	A/C	19	18811315	18811316	MI0009812	bta-mir-365-2	-	18811262	18811372	57				Somatic Cell Score	10446
rs442399576	A	A	A/T	19	18811317	18811318	MI0009812	bta-mir-365-2	-	18811262	18811372	55				Somatic Cell Score	10446
rs462348439	A	A	A/C	19	18811320	18811321	MI0009812	bta-mir-365-2	-	18811262	18811372	52				Somatic Cell Score	10446
rs384308405	C	C	A/C	19	18811326	18811327	MI0009812	bta-mir-365-2	-	18811262	18811372	46				Somatic Cell Score	10446
rs482653760	G	G	C/G	19	18811338	18811339	MI0009812	bta-mir-365-2	-	18811262	18811372	34				Somatic Cell Score	10446
rs444919249	T	T	C/T	19	18811352	18811353	MI0009812	bta-mir-365-2	-	18811262	18811372	20				Somatic Cell Score	10446
rs714708975	C	C	A/C	19	18813564	18813565	MI0011359	bta-mir-2333	-	18813556	18813618	54				Somatic Cell Score	10446
rs469092153	G	G	A/G	19	18813566	18813567	MI0011359	bta-mir-2333	-	18813556	18813618	52				Somatic Cell Score	10446
rs482486733	C	C	A/C	19	18813568	18813569	MI0011359	bta-mir-2333	-	18813556	18813618	50				Somatic Cell Score	10446
rs451026203	T	T	C/T	19	18813569	18813570	MI0011359	bta-mir-2333	-	18813556	18813618	49				Somatic Cell Score	10446
rs464882796	G	G	A/G	19	18813573	18813574	MI0011359	bta-mir-2333	-	18813556	18813618	45				Somatic Cell Score	10446
rs433423880	C	C	A/C	19	18813589	18813590	MI0011359	bta-mir-2333	-	18813556	18813618	29				Somatic Cell Score	10446
rs447157426	G	G	C/G	19	18813594	18813595	MI0011359	bta-mir-2333	-	18813556	18813618	24				Somatic Cell Score	10446
rs432076775	G	G	C/G	19	18824227	18824228	MI0005014	bta-mir-193a	-	18824221	18824301	74				Somatic Cell Score	10446
rs452217996	A	A	A/G	19	18824228	18824229	MI0005014	bta-mir-193a	-	18824221	18824301	73				Somatic Cell Score	10446
rs110217469	G	G	A/G	19	18824294	18824295	MI0005014	bta-mir-193a	-	18824221	18824301	7				Somatic Cell Score	10446
rs445339415	T	T	C/T	19	18824296	18824297	MI0005014	bta-mir-193a	-	18824221	18824301	5				Somatic Cell Score	10446
rs446025669	A	A	A/C	19	20796868	20796869	MI0009837	bta-mir-451	-	20796860	20796930	62				Somatic Cell Score	10446
rs464690624	C	C	C/G	19	20796870	20796871	MI0009837	bta-mir-451	-	20796860	20796930	60				Somatic Cell Score	10446
rs438063224	A	A	A/C	19	20796876	20796877	MI0009837	bta-mir-451	-	20796860	20796930	54				Somatic Cell Score	10446
rs454279972	A	A	A/C	19	20796922	20796923	MI0009837	bta-mir-451	-	20796860	20796930	8				Somatic Cell Score	10446
rs472678584	C	C	A/C	19	20796925	20796926	MI0009837	bta-mir-451	-	20796860	20796930	5				Somatic Cell Score	10446
rs483196582	A	A	A/T	19	20797027	20797028	MI0009744	bta-mir-144	-	20797022	20797105	78				Somatic Cell Score	10446
rs207904456	G	G	A/G	19	20797063	20797064	MI0009744	bta-mir-144	-	20797022	20797105	42				Somatic Cell Score	10446
rs715761811	T	T	C/T	19	20797080	20797081	MI0009744	bta-mir-144	-	20797022	20797105	25				Somatic Cell Score	10446
rs468650699	G	G	G/T	19	20797086	20797087	MI0009744	bta-mir-144	-	20797022	20797105	19				Somatic Cell Score	10446
rs435805602	A	A	A/C/T	19	20797089	20797090	MI0009744	bta-mir-144	-	20797022	20797105	16				Somatic Cell Score	10446
rs454144201	T	T	C/T	19	20797096	20797097	MI0009744	bta-mir-144	-	20797022	20797105	9				Somatic Cell Score	10446
rs435198851	A	A	A/G	19	21433073	21433074	MI0011360	bta-mir-2334	-	21433032	21433103	30				Somatic Cell Score	10446
rs453639207	T	T	G/T	19	21433075	21433076	MI0011360	bta-mir-2334	-	21433032	21433103	28				Somatic Cell Score	10446
rs720709661	C	C	C/T	19	21433098	21433099	MI0011360	bta-mir-2334	-	21433032	21433103	5				Somatic Cell Score	10446
rs460213643	G	G	G/T	19	21799561	21799562	MI0005046	bta-mir-423	+	21799484	21799577	79				Somatic Cell Score	10446
rs472351908	A	A	A/G	19	21799568	21799569	MI0005046	bta-mir-423	+	21799484	21799577	86				Somatic Cell Score	10446
rs439756292	C	C	C/T	19	21799571	21799572	MI0005046	bta-mir-423	+	21799484	21799577	89				Somatic Cell Score	10446
rs722633950	T	T	C/T	19	22637642	22637643	MI0011361	bta-mir-2335	+	22637611	22637679	33				Somatic Cell Score	10446
rs799736714	A	A	A/T	19	22637677	22637678	MI0011361	bta-mir-2335	+	22637611	22637679	68				Somatic Cell Score	10446
rs435568454	A	A	A/G	19	22824636	22824637	MI0011362	bta-mir-2336	+	22824635	22824710	3				Somatic Cell Score	10446
rs454239349	A	A	A/G	19	22824638	22824639	MI0011362	bta-mir-2336	+	22824635	22824710	5				Somatic Cell Score	10446
rs444411729	G	G	A/G	19	22824643	22824644	MI0011362	bta-mir-2336	+	22824635	22824710	10				Somatic Cell Score	10446
rs472678932	A	A	A/G	19	22824651	22824652	MI0011362	bta-mir-2336	+	22824635	22824710	18				Somatic Cell Score	10446
rs433806832	A	A	A/C	19	22824652	22824653	MI0011362	bta-mir-2336	+	22824635	22824710	19				Somatic Cell Score	10446
rs452197661	G	G	G/T	19	22824664	22824665	MI0011362	bta-mir-2336	+	22824635	22824710	31				Somatic Cell Score	10446
rs210782551	A	A	A/G	19	22824672	22824673	MI0011362	bta-mir-2336	+	22824635	22824710	39				Somatic Cell Score	10446
rs470556082	A	A	A/G	19	22824676	22824677	MI0011362	bta-mir-2336	+	22824635	22824710	43				Somatic Cell Score	10446
rs208992339	C	C	A/C	19	22824680	22824681	MI0011362	bta-mir-2336	+	22824635	22824710	47				Somatic Cell Score	10446
rs474656822	T	T	C/T	19	22824709	22824710	MI0011362	bta-mir-2336	+	22824635	22824710	76				Somatic Cell Score	10446
rs444497615	A	A	A/T	19	23382499	23382500	MI0015943	bta-mir-3600	+	23382437	23382517	64				Somatic Cell Score	10446
rs462828661	A	A	A/G	19	23382501	23382502	MI0015943	bta-mir-3600	+	23382437	23382517	66				Somatic Cell Score	10446
rs474988085	T	T	G/T	19	23382507	23382508	MI0015943	bta-mir-3600	+	23382437	23382517	72				Somatic Cell Score	10446
rs474988085	T	T	G/T	19	23382507	23382508	MI0005041	bta-mir-22	-	23382435	23382519	12				Somatic Cell Score	10446
rs452161417	C	C	A/C	19	23651140	23651141	MI0005028	bta-mir-132	-	23651140	23651240	100				Somatic Cell Score	10446
rs470659145	G	G	C/G	19	23651147	23651148	MI0005028	bta-mir-132	-	23651140	23651240	93				Somatic Cell Score	10446
rs478750309	C	C	C/T	19	23651191	23651192	MI0005028	bta-mir-132	-	23651140	23651240	49				Somatic Cell Score	10446
rs446781877	T	T	G/T	19	23651204	23651205	MI0005028	bta-mir-132	-	23651140	23651240	36				Somatic Cell Score	10446
rs465221563	C	C	A/C	19	23651205	23651206	MI0005028	bta-mir-132	-	23651140	23651240	35				Somatic Cell Score	10446
rs477505057	G	G	G/T	19	23651206	23651207	MI0005028	bta-mir-132	-	23651140	23651240	34				Somatic Cell Score	10446
rs450906221	G	G	G/T	19	23651210	23651211	MI0005028	bta-mir-132	-	23651140	23651240	30				Somatic Cell Score	10446
rs469556245	A	A	A/T	19	23651213	23651214	MI0005028	bta-mir-132	-	23651140	23651240	27				Somatic Cell Score	10446
rs436579148	T	T	G/T	19	23651217	23651218	MI0005028	bta-mir-132	-	23651140	23651240	23				Somatic Cell Score	10446
rs455167637	T	T	A/T	19	23651218	23651219	MI0005028	bta-mir-132	-	23651140	23651240	22				Somatic Cell Score	10446
rs467250980	G	G	C/G	19	23651219	23651220	MI0005028	bta-mir-132	-	23651140	23651240	21				Somatic Cell Score	10446
rs434294552	C	C	A/C/T	19	23651220	23651221	MI0005028	bta-mir-132	-	23651140	23651240	20				Somatic Cell Score	10446
rs452097761	C	C	C/G	19	23651221	23651222	MI0005028	bta-mir-132	-	23651140	23651240	19				Somatic Cell Score	10446
rs470586445	C	C	A/C	19	23651222	23651223	MI0005028	bta-mir-132	-	23651140	23651240	18				Somatic Cell Score	10446
rs444075201	T	T	G/T	19	23651223	23651224	MI0005028	bta-mir-132	-	23651140	23651240	17				Somatic Cell Score	10446
rs456169139	A	A	A/T	19	23651226	23651227	MI0005028	bta-mir-132	-	23651140	23651240	14				Somatic Cell Score	10446
rs474769250	G	G	C/G/T	19	23651227	23651228	MI0005028	bta-mir-132	-	23651140	23651240	13				Somatic Cell Score	10446
rs441782249	A	A	A/T	19	23651228	23651229	MI0005028	bta-mir-132	-	23651140	23651240	12				Somatic Cell Score	10446
rs460206186	G	G	G/T	19	23651230	23651231	MI0005028	bta-mir-132	-	23651140	23651240	10				Somatic Cell Score	10446
rs478688655	G	G	A/G/T	19	23651232	23651233	MI0005028	bta-mir-132	-	23651140	23651240	8				Somatic Cell Score	10446
rs439481452	G	G	A/G/T	19	23651235	23651236	MI0005028	bta-mir-132	-	23651140	23651240	5				Somatic Cell Score	10446
rs444839495	C	C	A/C/G	19	23651571	23651572	MI0009776	bta-mir-212	-	23651570	23651680	109				Somatic Cell Score	10446
rs463453328	G	G	C/G	19	23651573	23651574	MI0009776	bta-mir-212	-	23651570	23651680	107				Somatic Cell Score	10446
rs482007647	C	C	C/G	19	23651576	23651577	MI0009776	bta-mir-212	-	23651570	23651680	104				Somatic Cell Score	10446
rs449047586	C	C	C/T	19	23651577	23651578	MI0009776	bta-mir-212	-	23651570	23651680	103				Somatic Cell Score	10446
rs467588591	A	A	A/C	19	23651578	23651579	MI0009776	bta-mir-212	-	23651570	23651680	102				Somatic Cell Score	10446
rs434628281	G	G	C/G	19	23651579	23651580	MI0009776	bta-mir-212	-	23651570	23651680	101				Somatic Cell Score	10446
rs446769055	C	C	A/C/G	19	23651581	23651582	MI0009776	bta-mir-212	-	23651570	23651680	99				Somatic Cell Score	10446
rs465314066	G	G	C/G	19	23651582	23651583	MI0009776	bta-mir-212	-	23651570	23651680	98				Somatic Cell Score	10446
rs433162555	T	T	C/G/T	19	23651583	23651584	MI0009776	bta-mir-212	-	23651570	23651680	97				Somatic Cell Score	10446
rs451636557	C	C	C/G	19	23651584	23651585	MI0009776	bta-mir-212	-	23651570	23651680	96				Somatic Cell Score	10446
rs476719238	G	G	C/G	19	23651585	23651586	MI0009776	bta-mir-212	-	23651570	23651680	95				Somatic Cell Score	10446
rs437304053	T	T	C/G/T	19	23651587	23651588	MI0009776	bta-mir-212	-	23651570	23651680	93				Somatic Cell Score	10446
rs455739520	C	C	C/G	19	23651590	23651591	MI0009776	bta-mir-212	-	23651570	23651680	90				Somatic Cell Score	10446
rs474216348	G	G	C/G	19	23651592	23651593	MI0009776	bta-mir-212	-	23651570	23651680	88				Somatic Cell Score	10446
rs441420909	T	T	C/G/T	19	23651593	23651594	MI0009776	bta-mir-212	-	23651570	23651680	87				Somatic Cell Score	10446
rs459873719	A	A	A/C/G	19	23651595	23651596	MI0009776	bta-mir-212	-	23651570	23651680	85				Somatic Cell Score	10446
rs472112736	A	A	A/G	19	23651600	23651601	MI0009776	bta-mir-212	-	23651570	23651680	80				Somatic Cell Score	10446
rs438365406	A	A	A/C/G	19	23651602	23651603	MI0009776	bta-mir-212	-	23651570	23651680	78				Somatic Cell Score	10446
rs463342654	C	C	A/C	19	23651609	23651610	MI0009776	bta-mir-212	-	23651570	23651680	71				Somatic Cell Score	10446
rs481937966	T	T	G/T	19	23651610	23651611	MI0009776	bta-mir-212	-	23651570	23651680	70				Somatic Cell Score	10446
rs449012402	G	G	A/G	19	23651614	23651615	MI0009776	bta-mir-212	-	23651570	23651680	66				Somatic Cell Score	10446
rs461099595	C	C	C/G	19	23651616	23651617	MI0009776	bta-mir-212	-	23651570	23651680	64				Somatic Cell Score	10446
rs479608028	G	G	C/G	19	23651618	23651619	MI0009776	bta-mir-212	-	23651570	23651680	62				Somatic Cell Score	10446
rs446707711	C	C	C/G	19	23651621	23651622	MI0009776	bta-mir-212	-	23651570	23651680	59				Somatic Cell Score	10446
rs465255119	G	G	C/G	19	23651622	23651623	MI0009776	bta-mir-212	-	23651570	23651680	58				Somatic Cell Score	10446
rs432301284	A	A	A/G	19	23651626	23651627	MI0009776	bta-mir-212	-	23651570	23651680	54				Somatic Cell Score	10446
rs442494014	C	C	A/C	19	23651651	23651652	MI0009776	bta-mir-212	-	23651570	23651680	29				Somatic Cell Score	10446
rs461036590	G	G	C/G	19	23651652	23651653	MI0009776	bta-mir-212	-	23651570	23651680	28				Somatic Cell Score	10446
rs479544607	C	C	A/C/G	19	23651654	23651655	MI0009776	bta-mir-212	-	23651570	23651680	26				Somatic Cell Score	10446
rs440210722	T	T	C/G/T	19	23651659	23651660	MI0009776	bta-mir-212	-	23651570	23651680	21				Somatic Cell Score	10446
rs458703396	G	G	A/G	19	23651660	23651661	MI0009776	bta-mir-212	-	23651570	23651680	20				Somatic Cell Score	10446
rs477306511	G	G	A/G	19	23651666	23651667	MI0009776	bta-mir-212	-	23651570	23651680	14				Somatic Cell Score	10446
rs450706053	C	C	A/C	19	23651678	23651679	MI0009776	bta-mir-212	-	23651570	23651680	2				Somatic Cell Score	10446
rs520232478	C	C	C/T	19	27298419	27298420	MI0011365	bta-mir-2338	+	27298367	27298439	54				Somatic Cell Score	10446
rs453413199	G	G	A/G	19	27298424	27298425	MI0011365	bta-mir-2338	+	27298367	27298439	59				Somatic Cell Score	10446
rs467100435	A	A	A/G	19	27298427	27298428	MI0011365	bta-mir-2338	+	27298367	27298439	62				Somatic Cell Score	10446
rs432719743	C	C	C/T	19	27298435	27298436	MI0011365	bta-mir-2338	+	27298367	27298439	70				Somatic Cell Score	10446
rs448056709	A	A	A/C	19	27441343	27441344	MI0005459	bta-mir-195	-	27441343	27441429	86				Somatic Cell Score	10446
rs468271700	A	A	A/C/T	19	27441346	27441347	MI0005459	bta-mir-195	-	27441343	27441429	83				Somatic Cell Score	10446
rs433618880	C	C	A/C	19	27441353	27441354	MI0005459	bta-mir-195	-	27441343	27441429	76				Somatic Cell Score	10446
rs447375288	A	A	A/G/T	19	27441357	27441358	MI0005459	bta-mir-195	-	27441343	27441429	72				Somatic Cell Score	10446
rs137311576	G	G	C/G	19	27441361	27441362	MI0005459	bta-mir-195	-	27441343	27441429	68				Somatic Cell Score	10446
rs464370663	C	C	A/C	19	27441362	27441363	MI0005459	bta-mir-195	-	27441343	27441429	67				Somatic Cell Score	10446
rs135646700	A	A	A/C	19	27441363	27441364	MI0005459	bta-mir-195	-	27441343	27441429	66				Somatic Cell Score	10446
rs432955217	C	C	C/T	19	27441368	27441369	MI0005459	bta-mir-195	-	27441343	27441429	61				Somatic Cell Score	10446
rs456384827	A	A	A/C	19	27441372	27441373	MI0005459	bta-mir-195	-	27441343	27441429	57				Somatic Cell Score	10446
rs476516789	C	C	C/T	19	27441385	27441386	MI0005459	bta-mir-195	-	27441343	27441429	44				Somatic Cell Score	10446
rs435560982	C	C	C/T	19	27441388	27441389	MI0005459	bta-mir-195	-	27441343	27441429	41				Somatic Cell Score	10446
rs455535094	A	A	A/C	19	27441391	27441392	MI0005459	bta-mir-195	-	27441343	27441429	38				Somatic Cell Score	10446
rs443781501	C	C	A/C	19	27441418	27441419	MI0005459	bta-mir-195	-	27441343	27441429	11				Somatic Cell Score	10446
rs464041725	G	G	G/T	19	27441422	27441423	MI0005459	bta-mir-195	-	27441343	27441429	7				Somatic Cell Score	10446
rs448093877	C	C	A/C	19	27441671	27441672	MI0005467	bta-mir-497	-	27441652	27441763	92				Somatic Cell Score	10446
rs461779027	C	C	A/C	19	27441673	27441674	MI0005467	bta-mir-497	-	27441652	27441763	90				Somatic Cell Score	10446
rs136746452	T	T	A/T	19	27441691	27441692	MI0005467	bta-mir-497	-	27441652	27441763	72				Somatic Cell Score	10446
rs447328787	T	T	C/T	19	27441693	27441694	MI0005467	bta-mir-497	-	27441652	27441763	70				Somatic Cell Score	10446
rs464229072	T	T	G/T	19	27441696	27441697	MI0005467	bta-mir-497	-	27441652	27441763	67				Somatic Cell Score	10446
rs433000756	T	T	G/T	19	27441698	27441699	MI0005467	bta-mir-497	-	27441652	27441763	65				Somatic Cell Score	10446
rs449821299	A	A	A/G	19	27441701	27441702	MI0005467	bta-mir-497	-	27441652	27441763	62				Somatic Cell Score	10446
rs470080260	G	G	C/G/T	19	27441712	27441713	MI0005467	bta-mir-497	-	27441652	27441763	51				Somatic Cell Score	10446
rs434729441	A	A	A/G	19	27441747	27441748	MI0005467	bta-mir-497	-	27441652	27441763	16				Somatic Cell Score	10446
rs451721245	A	A	A/G	19	27441750	27441751	MI0005467	bta-mir-497	-	27441652	27441763	13				Somatic Cell Score	10446
rs458523308	A	A	A/C	19	27571363	27571364	MI0009798	bta-mir-324	-	27571341	27571429	66				Somatic Cell Score	10446
rs481844341	G	G	G/T	19	27571377	27571378	MI0009798	bta-mir-324	-	27571341	27571429	52				Somatic Cell Score	10446
rs436020868	C	C	A/C	19	27571423	27571424	MI0009798	bta-mir-324	-	27571341	27571429	6				Somatic Cell Score	10446
rs446611846	G	G	A/G	19	27571426	27571427	MI0009798	bta-mir-324	-	27571341	27571429	3				Somatic Cell Score	10446
rs383303965	G	G	A/G	19	29030450	29030451	MI0022327	bta-mir-2284aa-3	-	29030430	29030509	59				Somatic Cell Score	10446
rs380935727	A	A	A/G	19	29030456	29030457	MI0022327	bta-mir-2284aa-3	-	29030430	29030509	53				Somatic Cell Score	10446
rs442288511	A	A	A/T	19	29030469	29030470	MI0022327	bta-mir-2284aa-3	-	29030430	29030509	40				Somatic Cell Score	10446
rs518070453	-	-	-/A	19	29030500	29030500	MI0022327	bta-mir-2284aa-3	-	29030430	29030509	9				Somatic Cell Score	10446
rs445323575	T	T	G/T	19	31333513	31333514	MI0009891	bta-mir-744	+	31333512	31333611	3				Somatic Cell Score	10446
rs465363913	G	G	C/G	19	31333515	31333516	MI0009891	bta-mir-744	+	31333512	31333611	5				Somatic Cell Score	10446
rs437153435	T	T	A/G/T	19	31333523	31333524	MI0009891	bta-mir-744	+	31333512	31333611	13				Somatic Cell Score	10446
rs432112526	A	A	A/G	19	31333567	31333568	MI0009891	bta-mir-744	+	31333512	31333611	57				Somatic Cell Score	10446
rs452170498	G	G	A/G	19	31333582	31333583	MI0009891	bta-mir-744	+	31333512	31333611	72				Somatic Cell Score	10446
rs475416069	A	A	A/T	19	31333592	31333593	MI0009891	bta-mir-744	+	31333512	31333611	82				Somatic Cell Score	10446
rs443953983	C	C	A/C	19	31333593	31333594	MI0009891	bta-mir-744	+	31333512	31333611	83				Somatic Cell Score	10446
rs471334215	T	T	G/T	19	31973543	31973544	MI0011366	bta-mir-2339	-	31973541	31973612	69				Somatic Cell Score	10446
rs433305280	G	G	A/G	19	31973545	31973546	MI0011366	bta-mir-2339	-	31973541	31973612	67				Somatic Cell Score	10446
rs718061452	AA	AA	-/AA	19	31973570	31973572	MI0011366	bta-mir-2339	-	31973541	31973612	42				Somatic Cell Score	10446
rs442284896	A	A	A/G	19	31973608	31973609	MI0011366	bta-mir-2339	-	31973541	31973612	4				Somatic Cell Score	10446
rs462475853	T	T	A/T	19	31973611	31973612	MI0011366	bta-mir-2339	-	31973541	31973612	1				Somatic Cell Score	10446
rs440420372	C	C	A/C	19	35249061	35249062	MI0009808	bta-mir-33b	+	35249052	35249145	11				Somatic Cell Score	10446
rs462106030	G	G	G/T	19	35249063	35249064	MI0009808	bta-mir-33b	+	35249052	35249145	13				Somatic Cell Score	10446
rs480765380	G	G	A/G	19	35249065	35249066	MI0009808	bta-mir-33b	+	35249052	35249145	15				Somatic Cell Score	10446
rs445711630	T	T	A/T	19	35249087	35249088	MI0009808	bta-mir-33b	+	35249052	35249145	37				Somatic Cell Score	10446
rs464290221	A	A	A/C	19	35249097	35249098	MI0009808	bta-mir-33b	+	35249052	35249145	47				Somatic Cell Score	10446
rs525962423	-	-	-/G	19	35249098	35249098	MI0009808	bta-mir-33b	+	35249052	35249145	47				Somatic Cell Score	10446
rs434463691	A	A	A/C	19	35249103	35249104	MI0009808	bta-mir-33b	+	35249052	35249145	53				Somatic Cell Score	10446
rs452918587	C	C	C/G	19	35249122	35249123	MI0009808	bta-mir-33b	+	35249052	35249145	72				Somatic Cell Score	10446
rs468165453	G	G	A/G	19	35249127	35249128	MI0009808	bta-mir-33b	+	35249052	35249145	77				Somatic Cell Score	10446
rs435483675	C	C	C/G	19	35249128	35249129	MI0009808	bta-mir-33b	+	35249052	35249145	78				Somatic Cell Score	10446
rs457186561	C	C	A/C	19	35249129	35249130	MI0009808	bta-mir-33b	+	35249052	35249145	79				Somatic Cell Score	10446
rs457581427	G	G	A/G/T	19	35249130	35249131	MI0009808	bta-mir-33b	+	35249052	35249145	80				Somatic Cell Score	10446
rs439400906	G	G	C/G	19	35249131	35249132	MI0009808	bta-mir-33b	+	35249052	35249145	81				Somatic Cell Score	10446
rs451373402	A	A	A/C	19	35249140	35249141	MI0009808	bta-mir-33b	+	35249052	35249145	90				Somatic Cell Score	10446
rs473563742	C	C	A/C/T	19	35249144	35249145	MI0009808	bta-mir-33b	+	35249052	35249145	94				Somatic Cell Score	10446
rs438228095	T	T	G/T	19	36871902	36871903	MI0009868	bta-mir-584-2	+	36871898	36871986	6				Somatic Cell Score	10446
rs714704092	C	C	C/T	19	36871943	36871944	MI0009868	bta-mir-584-2	+	36871898	36871986	47				Somatic Cell Score	10446
rs456756766	G	G	G/T	19	38542857	38542858	MI0013059	bta-mir-2886	+	38542846	38542920	13				Somatic Cell Score	10446
rs441786573	T	T	G/T	19	38549335	38549336	MI0005007	bta-mir-10a	+	38549254	38549362	83				Somatic Cell Score	10446
rs461485972	C	C	C/G	19	38549354	38549355	MI0005007	bta-mir-10a	+	38549254	38549362	102				Somatic Cell Score	10446
rs453282545	T	T	G/T	19	38899675	38899676	MI0011368	bta-mir-2340	+	38899671	38899746	6				Somatic Cell Score	10446
rs723439207	C	C	C/T	19	38899685	38899686	MI0011368	bta-mir-2340	+	38899671	38899746	16				Somatic Cell Score	10446
rs468994112	T	T	G/T	19	39081166	39081167	MI0009748	bta-mir-152	+	39081165	39081250	3				Somatic Cell Score	10446
rs432805699	C	C	C/G	19	39081167	39081168	MI0009748	bta-mir-152	+	39081165	39081250	4				Somatic Cell Score	10446
rs110339121	T	T	C/T	19	39081169	39081170	MI0009748	bta-mir-152	+	39081165	39081250	6				Somatic Cell Score	10446
rs466519287	G	G	C/G	19	39081174	39081175	MI0015944	bta-mir-2957	-	39081172	39081242	68				Somatic Cell Score	10446
rs466519287	G	G	C/G	19	39081174	39081175	MI0009748	bta-mir-152	+	39081165	39081250	11				Somatic Cell Score	10446
rs434921709	C	C	A/C	19	39081175	39081176	MI0015944	bta-mir-2957	-	39081172	39081242	67				Somatic Cell Score	10446
rs434921709	C	C	A/C	19	39081175	39081176	MI0009748	bta-mir-152	+	39081165	39081250	12				Somatic Cell Score	10446
rs453384516	A	A	A/C/G	19	39081178	39081179	MI0015944	bta-mir-2957	-	39081172	39081242	64				Somatic Cell Score	10446
rs453384516	A	A	A/C/G	19	39081178	39081179	MI0009748	bta-mir-152	+	39081165	39081250	15				Somatic Cell Score	10446
rs475065413	G	G	A/G	19	39081179	39081180	MI0015944	bta-mir-2957	-	39081172	39081242	63				Somatic Cell Score	10446
rs475065413	G	G	A/G	19	39081179	39081180	MI0009748	bta-mir-152	+	39081165	39081250	16				Somatic Cell Score	10446
rs442294414	T	T	C/T	19	39081181	39081182	MI0015944	bta-mir-2957	-	39081172	39081242	61				Somatic Cell Score	10446
rs442294414	T	T	C/T	19	39081181	39081182	MI0009748	bta-mir-152	+	39081165	39081250	18				Somatic Cell Score	10446
rs457608116	T	T	C/T	19	39081182	39081183	MI0015944	bta-mir-2957	-	39081172	39081242	60				Somatic Cell Score	10446
rs457608116	T	T	C/T	19	39081182	39081183	MI0009748	bta-mir-152	+	39081165	39081250	19				Somatic Cell Score	10446
rs475831448	T	T	G/T	19	39081184	39081185	MI0015944	bta-mir-2957	-	39081172	39081242	58				Somatic Cell Score	10446
rs475831448	T	T	G/T	19	39081184	39081185	MI0009748	bta-mir-152	+	39081165	39081250	21				Somatic Cell Score	10446
rs439625522	T	T	G/T	19	39081186	39081187	MI0015944	bta-mir-2957	-	39081172	39081242	56				Somatic Cell Score	10446
rs439625522	T	T	G/T	19	39081186	39081187	MI0009748	bta-mir-152	+	39081165	39081250	23				Somatic Cell Score	10446
rs458198446	G	G	C/G	19	39081187	39081188	MI0015944	bta-mir-2957	-	39081172	39081242	55				Somatic Cell Score	10446
rs458198446	G	G	C/G	19	39081187	39081188	MI0009748	bta-mir-152	+	39081165	39081250	24				Somatic Cell Score	10446
rs524184723	A	A	-/A	19	39081190	39081191	MI0015944	bta-mir-2957	-	39081172	39081242	52				Somatic Cell Score	10446
rs524184723	A	A	-/A	19	39081190	39081191	MI0009748	bta-mir-152	+	39081165	39081250	27				Somatic Cell Score	10446
rs479935021	T	T	A/T	19	39081208	39081209	MI0015944	bta-mir-2957	-	39081172	39081242	34				Somatic Cell Score	10446
rs479935021	T	T	A/T	19	39081208	39081209	MI0009748	bta-mir-152	+	39081165	39081250	45				Somatic Cell Score	10446
rs440186155	A	A	A/C/G	19	39081211	39081212	MI0015944	bta-mir-2957	-	39081172	39081242	31				Somatic Cell Score	10446
rs440186155	A	A	A/C/G	19	39081211	39081212	MI0009748	bta-mir-152	+	39081165	39081250	48				Somatic Cell Score	10446
rs461951044	A	A	A/G	19	39081214	39081215	MI0015944	bta-mir-2957	-	39081172	39081242	28				Somatic Cell Score	10446
rs461951044	A	A	A/G	19	39081214	39081215	MI0009748	bta-mir-152	+	39081165	39081250	51				Somatic Cell Score	10446
rs433660833	C	C	C/T	19	39081239	39081240	MI0015944	bta-mir-2957	-	39081172	39081242	3				Somatic Cell Score	10446
rs433660833	C	C	C/T	19	39081239	39081240	MI0009748	bta-mir-152	+	39081165	39081250	76				Somatic Cell Score	10446
rs448935827	C	C	A/C	19	39081240	39081241	MI0015944	bta-mir-2957	-	39081172	39081242	2				Somatic Cell Score	10446
rs448935827	C	C	A/C	19	39081240	39081241	MI0009748	bta-mir-152	+	39081165	39081250	77				Somatic Cell Score	10446
rs468600262	G	G	G/T	19	39081242	39081243	MI0015944	bta-mir-2957	-	39081172	39081242	0				Somatic Cell Score	10446
rs468600262	G	G	G/T	19	39081242	39081243	MI0009748	bta-mir-152	+	39081165	39081250	79				Somatic Cell Score	10446
rs435813987	A	A	A/G	19	39081247	39081248	MI0009748	bta-mir-152	+	39081165	39081250	84				Somatic Cell Score	10446
rs472742195	T	T	A/T	19	40516440	40516441	MI0011370	bta-mir-2342	+	40516423	40516496	19				Somatic Cell Score	10446
rs439970082	T	T	G/T	19	40516442	40516443	MI0011370	bta-mir-2342	+	40516423	40516496	21				Somatic Cell Score	10446
rs460173649	T	T	G/T	19	40516450	40516451	MI0011370	bta-mir-2342	+	40516423	40516496	29				Somatic Cell Score	10446
rs433894495	T	T	G/T	19	40516494	40516495	MI0011370	bta-mir-2342	+	40516423	40516496	73				Somatic Cell Score	10446
rs466930380	A	A	A/C/G	19	40683920	40683921	MI0021119	bta-mir-4286-1	-	40683920	40683995	75				Somatic Cell Score	10446
rs435734491	T	T	G/T	19	40683922	40683923	MI0021119	bta-mir-4286-1	-	40683920	40683995	73				Somatic Cell Score	10446
rs449505526	C	C	C/G	19	40683928	40683929	MI0021119	bta-mir-4286-1	-	40683920	40683995	67				Somatic Cell Score	10446
rs469659593	A	A	A/C/T	19	40683932	40683933	MI0021119	bta-mir-4286-1	-	40683920	40683995	63				Somatic Cell Score	10446
rs438285671	C	C	C/G	19	40683934	40683935	MI0021119	bta-mir-4286-1	-	40683920	40683995	61				Somatic Cell Score	10446
rs456845710	A	A	A/C	19	40683943	40683944	MI0021119	bta-mir-4286-1	-	40683920	40683995	52				Somatic Cell Score	10446
rs470606091	G	G	G/T	19	40683945	40683946	MI0021119	bta-mir-4286-1	-	40683920	40683995	50				Somatic Cell Score	10446
rs521325767	G	G	A/G	19	40683957	40683958	MI0021119	bta-mir-4286-1	-	40683920	40683995	38				Somatic Cell Score	10446
rs522134373	-	-	-/A	19	40683961	40683961	MI0021119	bta-mir-4286-1	-	40683920	40683995	34				Somatic Cell Score	10446
rs432776405	C	C	A/C	19	40683962	40683963	MI0021119	bta-mir-4286-1	-	40683920	40683995	33				Somatic Cell Score	10446
rs453009503	A	A	A/C	19	40683963	40683964	MI0021119	bta-mir-4286-1	-	40683920	40683995	32				Somatic Cell Score	10446
rs473137329	A	A	A/G	19	40683964	40683965	MI0021119	bta-mir-4286-1	-	40683920	40683995	31				Somatic Cell Score	10446
rs441792447	G	G	C/G	19	40683968	40683969	MI0021119	bta-mir-4286-1	-	40683920	40683995	27				Somatic Cell Score	10446
rs477985782	T	T	C/G/T	19	40683989	40683990	MI0021119	bta-mir-4286-1	-	40683920	40683995	6				Somatic Cell Score	10446
rs440395658	G	G	A/G	19	40683992	40683993	MI0021119	bta-mir-4286-1	-	40683920	40683995	3				Somatic Cell Score	10446
rs460465268	C	C	A/C	19	40683994	40683995	MI0021119	bta-mir-4286-1	-	40683920	40683995	1				Somatic Cell Score	10446
rs799910088	CT	CT	-/CT	19	45204959	45204961	MI0011371	bta-mir-2343	-	45204924	45204997	38				Somatic Cell Score	10446
rs800726812	T	T	G/T	19	45204962	45204963	MI0011371	bta-mir-2343	-	45204924	45204997	35				Somatic Cell Score	10446
rs134521333	A	A	A/C	19	49332134	49332135	MI0031503	bta-mir-3064	-	49332072	49332155	21				Somatic Cell Score	19038
rs444587136	A	A	A/C	19	49332142	49332143	MI0031503	bta-mir-3064	-	49332072	49332155	13				Somatic Cell Score	19038
rs438972411	A	A	A/G	19	50423940	50423941	MI0011372	bta-mir-2344	-	50423906	50423966	26				Somatic Cell Score	19038
rs457237117	C	C	A/C	19	50423942	50423943	MI0011372	bta-mir-2344	-	50423906	50423966	24				Somatic Cell Score	19038
rs475729965	C	C	C/G	19	50423946	50423947	MI0011372	bta-mir-2344	-	50423906	50423966	20				Somatic Cell Score	19038
rs525116489	-	-	-/T	19	50423947	50423947	MI0011372	bta-mir-2344	-	50423906	50423966	19				Somatic Cell Score	19038
rs442753704	G	G	C/G	19	50423953	50423954	MI0011372	bta-mir-2344	-	50423906	50423966	13				Somatic Cell Score	19038
rs461340128	T	T	G/T	19	50423961	50423962	MI0011372	bta-mir-2344	-	50423906	50423966	5				Somatic Cell Score	19038
rs381648152	C	C	C/T	19	50423962	50423963	MI0011372	bta-mir-2344	-	50423906	50423966	4				Somatic Cell Score	19038
rs211455605	G	G	A/G	19	50423963	50423964	MI0011372	bta-mir-2344	-	50423906	50423966	3				Somatic Cell Score	19038
rs458394903	T	T	C/T	19	50853996	50853997	MI0011373	bta-mir-2345	-	50853965	50854027	31				Somatic Cell Score	19038
rs451402080	C	C	C/G	19	50854000	50854001	MI0011373	bta-mir-2345	-	50853965	50854027	27				Somatic Cell Score	19038
rs470051028	A	A	A/C	19	50854005	50854006	MI0011373	bta-mir-2345	-	50853965	50854027	22				Somatic Cell Score	19038
rs797749925	G	G	G/T	19	50854019	50854020	MI0011373	bta-mir-2345	-	50853965	50854027	8				Somatic Cell Score	19038
rs447353806	T	T	C/T	19	50889656	50889657	MI0011373_2	bta-mir-2345	-	50889625	50889687	31				Somatic Cell Score	19038
rs465890332	C	C	A/C	19	50889663	50889664	MI0011373_2	bta-mir-2345	-	50889625	50889687	24				Somatic Cell Score	19038
rs526678428	C	C	C/G	19	50889675	50889676	MI0011373_2	bta-mir-2345	-	50889625	50889687	12				Somatic Cell Score	19038
rs448669797	G	G	C/G	19	50931431	50931432	MI0011373_3	bta-mir-2345	-	50931428	50931490	59				Somatic Cell Score	19038
rs434259714	T	T	C/T	19	50931454	50931455	MI0011373_3	bta-mir-2345	-	50931428	50931490	36				Somatic Cell Score	19038
rs382227402	T	T	C/T	19	50931481	50931482	MI0011373_3	bta-mir-2345	-	50931428	50931490	9				Somatic Cell Score	19038
rs452821380	C	C	C/G	19	50931485	50931486	MI0011373_3	bta-mir-2345	-	50931428	50931490	5				Somatic Cell Score	19038
rs440866198	T	T	G/T	19	51594008	51594009	MI0011375	bta-mir-2347	+	51593973	51594031	37				Somatic Cell Score	19038
rs459226820	C	C	A/C	19	51594011	51594012	MI0011375	bta-mir-2347	+	51593973	51594031	40				Somatic Cell Score	19038
rs471364394	T	T	A/T	19	51594017	51594018	MI0011375	bta-mir-2347	+	51593973	51594031	46				Somatic Cell Score	19038
rs438690290	G	G	G/T	19	51594018	51594019	MI0011375	bta-mir-2347	+	51593973	51594031	47				Somatic Cell Score	19038
rs463639306	T	T	G/T	19	51594019	51594020	MI0011375	bta-mir-2347	+	51593973	51594031	48				Somatic Cell Score	19038
rs482091482	C	C	A/C	19	51594023	51594024	MI0011375	bta-mir-2347	+	51593973	51594031	52				Somatic Cell Score	19038
rs449135070	A	A	A/C	19	51594027	51594028	MI0011375	bta-mir-2347	+	51593973	51594031	56				Somatic Cell Score	19038
rs461120296	C	C	A/C	19	51594028	51594029	MI0011375	bta-mir-2347	+	51593973	51594031	57				Somatic Cell Score	19038
rs477256407	G	G	A/G	19	52189634	52189635	MI0009805	bta-mir-338	+	52189629	52189720	7				Somatic Cell Score	19038
rs444164316	A	A	A/C	19	52189646	52189647	MI0009805	bta-mir-338	+	52189629	52189720	19				Somatic Cell Score	19038
rs462688068	A	A	A/C	19	52189673	52189674	MI0009805	bta-mir-338	+	52189629	52189720	46				Somatic Cell Score	19038
rs481081219	A	A	A/G	19	52189679	52189680	MI0009805	bta-mir-338	+	52189629	52189720	52				Somatic Cell Score	19038
rs448025677	A	A	A/C	19	52189680	52189681	MI0009805	bta-mir-338	+	52189629	52189720	53				Somatic Cell Score	19038
rs133207384	T	T	C/T	19	52189682	52189683	MI0009805	bta-mir-338	+	52189629	52189720	55				Somatic Cell Score	19038
rs516984106	G	G	-/G	19	52189708	52189709	MI0009805	bta-mir-338	+	52189629	52189720	81				Somatic Cell Score	19038
rs457496980	C	C	A/C	19	52189711	52189712	MI0009805	bta-mir-338	+	52189629	52189720	84				Somatic Cell Score	19038
rs520770084	-	-	-/C	19	52189714	52189714	MI0009805	bta-mir-338	+	52189629	52189720	86				Somatic Cell Score	19038
rs469710273	T	T	C/T	19	52189715	52189716	MI0009805	bta-mir-338	+	52189629	52189720	88				Somatic Cell Score	19038
rs445408968	G	G	G/T	19	54221238	54221239	MI0011377	bta-mir-2349	-	54221185	54221249	11				Somatic Cell Score	10446
rs469432775	T	T	C/T	19	54657733	54657734	MI0011376	bta-mir-2348	+	54657733	54657811	2				Somatic Cell Score	10446
rs483119972	T	T	G/T	19	54657736	54657737	MI0011376	bta-mir-2348	+	54657733	54657811	5				Somatic Cell Score	10446
rs450692237	G	G	A/G	19	54657737	54657738	MI0011376	bta-mir-2348	+	54657733	54657811	6				Somatic Cell Score	10446
rs467586277	C	C	C/G	19	54657740	54657741	MI0011376	bta-mir-2348	+	54657733	54657811	9				Somatic Cell Score	10446
rs436272117	G	G	C/G	19	54657741	54657742	MI0011376	bta-mir-2348	+	54657733	54657811	10				Somatic Cell Score	10446
rs453210340	A	A	A/T	19	54657742	54657743	MI0011376	bta-mir-2348	+	54657733	54657811	11				Somatic Cell Score	10446
rs466525887	G	G	C/G	19	54657743	54657744	MI0011376	bta-mir-2348	+	54657733	54657811	12				Somatic Cell Score	10446
rs432000380	T	T	A/G/T	19	54657745	54657746	MI0011376	bta-mir-2348	+	54657733	54657811	14				Somatic Cell Score	10446
rs460890345	C	C	C/G	19	54657771	54657772	MI0011376	bta-mir-2348	+	54657733	54657811	40				Somatic Cell Score	10446
rs471281213	T	T	C/T	19	54657778	54657779	MI0011376	bta-mir-2348	+	54657733	54657811	47				Somatic Cell Score	10446
rs439535838	G	G	C/G/T	19	54657781	54657782	MI0011376	bta-mir-2348	+	54657733	54657811	50				Somatic Cell Score	10446
rs462973188	G	G	A/G	19	54657784	54657785	MI0011376	bta-mir-2348	+	54657733	54657811	53				Somatic Cell Score	10446
rs483085118	G	G	C/G	19	54657789	54657790	MI0011376	bta-mir-2348	+	54657733	54657811	58				Somatic Cell Score	10446
rs448634783	C	C	C/G/T	19	54657790	54657791	MI0011376	bta-mir-2348	+	54657733	54657811	59				Somatic Cell Score	10446
rs461122325	C	C	C/T	19	54657791	54657792	MI0011376	bta-mir-2348	+	54657733	54657811	60				Somatic Cell Score	10446
rs481309224	A	A	A/C	19	54657796	54657797	MI0011376	bta-mir-2348	+	54657733	54657811	65				Somatic Cell Score	10446
rs446699253	C	C	A/C	19	54657797	54657798	MI0011376	bta-mir-2348	+	54657733	54657811	66				Somatic Cell Score	10446
rs521046893	G	G	G/T	19	54657803	54657804	MI0011376	bta-mir-2348	+	54657733	54657811	72				Somatic Cell Score	10446
rs466852820	C	C	C/G/T	19	54657806	54657807	MI0011376	bta-mir-2348	+	54657733	54657811	75				Somatic Cell Score	10446
rs432278583	C	C	C/G	19	54657808	54657809	MI0011376	bta-mir-2348	+	54657733	54657811	77				Somatic Cell Score	10446
rs720573358	-	-	-/A	19	57410260	57410260	MI0022326	bta-mir-2284aa-2	+	57410252	57410330	9				Somatic Cell Score	10446
rs41974457	G	G	A/G	21	19985044	19985045	MI0010459	bta-mir-1179	+	19984962	19985051	84				Somatic Cell Score	5446
rs41974473	A	A	A/G	21	19989080	19989081	MI0010471	bta-mir-7-1	+	19989064	19989161	18				Somatic Cell Score	5446
rs41974474	T	T	C/T	21	19989150	19989151	MI0010471	bta-mir-7-1	+	19989064	19989161	88				Somatic Cell Score	5446
rs458957967	A	A	A/G	21	21157513	21157514	MI0011393	bta-mir-2363-1	+	21157504	21157577	11				Somatic Cell Score	5446
rs467511526	C	C	A/C	21	21157516	21157517	MI0011393	bta-mir-2363-1	+	21157504	21157577	14				Somatic Cell Score	5446
rs800675168	C	C	C/T	21	21157517	21157518	MI0011393	bta-mir-2363-1	+	21157504	21157577	15				Somatic Cell Score	5446
rs798895576	AC	AC	-/AC	21	21157521	21157523	MI0011393	bta-mir-2363-1	+	21157504	21157577	20				Somatic Cell Score	5446
rs482246126	C	C	C/G	21	21157523	21157524	MI0011393	bta-mir-2363-1	+	21157504	21157577	21				Somatic Cell Score	5446
rs799341618	-	-	-/A	21	21157527	21157527	MI0011393	bta-mir-2363-1	+	21157504	21157577	24				Somatic Cell Score	5446
rs797501154	T	T	G/T	21	21157527	21157528	MI0011393	bta-mir-2363-1	+	21157504	21157577	25				Somatic Cell Score	5446
rs450781760	G	G	C/G	21	21157529	21157530	MI0011393	bta-mir-2363-1	+	21157504	21157577	27				Somatic Cell Score	5446
rs461291765	A	A	A/C	21	21157531	21157532	MI0011393	bta-mir-2363-1	+	21157504	21157577	29				Somatic Cell Score	5446
rs481372281	T	T	G/T	21	21157534	21157535	MI0011393	bta-mir-2363-1	+	21157504	21157577	32				Somatic Cell Score	5446
rs481372281	T	T	G/T	21	21157534	21157535	MI0011394	bta-mir-2363-2	-	21157505	21157576	42				Somatic Cell Score	5446
rs446639139	A	A	A/T	21	21157535	21157536	MI0011393	bta-mir-2363-1	+	21157504	21157577	33				Somatic Cell Score	5446
rs446639139	A	A	A/T	21	21157535	21157536	MI0011394	bta-mir-2363-2	-	21157505	21157576	41				Somatic Cell Score	5446
rs466562502	T	T	A/T	21	21157537	21157538	MI0011393	bta-mir-2363-1	+	21157504	21157577	35				Somatic Cell Score	5446
rs466562502	T	T	A/T	21	21157537	21157538	MI0011394	bta-mir-2363-2	-	21157505	21157576	39				Somatic Cell Score	5446
rs432068059	G	G	G/T	21	21157540	21157541	MI0011393	bta-mir-2363-1	+	21157504	21157577	38				Somatic Cell Score	5446
rs432068059	G	G	G/T	21	21157540	21157541	MI0011394	bta-mir-2363-2	-	21157505	21157576	36				Somatic Cell Score	5446
rs445676426	A	A	A/C	21	21157541	21157542	MI0011393	bta-mir-2363-1	+	21157504	21157577	39				Somatic Cell Score	5446
rs445676426	A	A	A/C	21	21157541	21157542	MI0011394	bta-mir-2363-2	-	21157505	21157576	35				Somatic Cell Score	5446
rs468884107	G	G	C/G/T	21	21157546	21157547	MI0011393	bta-mir-2363-1	+	21157504	21157577	44				Somatic Cell Score	5446
rs468884107	G	G	C/G/T	21	21157546	21157547	MI0011394	bta-mir-2363-2	-	21157505	21157576	30				Somatic Cell Score	5446
rs481045526	T	T	A/T	21	21157573	21157574	MI0011393	bta-mir-2363-1	+	21157504	21157577	71				Somatic Cell Score	5446
rs481045526	T	T	A/T	21	21157573	21157574	MI0011394	bta-mir-2363-2	-	21157505	21157576	3				Somatic Cell Score	5446
rs440591497	A	A	A/C	21	21250102	21250103	MI0009912	bta-mir-9-1	+	21250101	21250190	3				Somatic Cell Score	5446
rs476573083	A	A	A/C	21	21250147	21250148	MI0009912	bta-mir-9-1	+	21250101	21250190	48				Somatic Cell Score	5446
rs441914473	C	C	C/G	21	21250150	21250151	MI0009912	bta-mir-9-1	+	21250101	21250190	51				Somatic Cell Score	5446
rs433469828	C	C	C/T	21	22859943	22859944	MI0011395	bta-mir-2364	+	22859905	22859978	40				Somatic Cell Score	5446
rs109316517	G	G	C/G	21	22859956	22859957	MI0011395	bta-mir-2364	+	22859905	22859978	53				Somatic Cell Score	5446
rs441121233	C	C	C/T	21	22859963	22859964	MI0011395	bta-mir-2364	+	22859905	22859978	60				Somatic Cell Score	5446
rs473643314	A	A	A/C	21	22859966	22859967	MI0011395	bta-mir-2364	+	22859905	22859978	63				Somatic Cell Score	5446
rs464193514	A	A	A/T	21	28046412	28046413	MI0009775	bta-mir-211	-	28046409	28046518	106				Somatic Cell Score	5446
rs434667811	G	G	G/T	21	28046424	28046425	MI0009775	bta-mir-211	-	28046409	28046518	94				Somatic Cell Score	5446
rs453180288	T	T	G/T	21	28046425	28046426	MI0009775	bta-mir-211	-	28046409	28046518	93				Somatic Cell Score	5446
rs474917315	C	C	A/C	21	28046431	28046432	MI0009775	bta-mir-211	-	28046409	28046518	87				Somatic Cell Score	5446
rs441773151	A	A	A/C	21	28046466	28046467	MI0009775	bta-mir-211	-	28046409	28046518	52				Somatic Cell Score	5446
rs476719315	C	C	A/C	21	28046498	28046499	MI0009775	bta-mir-211	-	28046409	28046518	20				Somatic Cell Score	5446
rs443729725	T	T	A/T	21	28046502	28046503	MI0009775	bta-mir-211	-	28046409	28046518	16				Somatic Cell Score	5446
rs458771412	G	G	C/G	21	28046513	28046514	MI0009775	bta-mir-211	-	28046409	28046518	5				Somatic Cell Score	5446
rs477257580	G	G	G/T	21	28046514	28046515	MI0009775	bta-mir-211	-	28046409	28046518	4				Somatic Cell Score	5446
rs441172478	G	G	C/G	21	28046516	28046517	MI0009775	bta-mir-211	-	28046409	28046518	2				Somatic Cell Score	5446
rs452466579	G	G	C/G	21	33857355	33857356	MI0009879	bta-mir-631	+	33857312	33857386	45				Somatic Cell Score	5446
rs472916376	A	A	A/C	21	33857360	33857361	MI0009879	bta-mir-631	+	33857312	33857386	50				Somatic Cell Score	5446
rs441455567	C	C	C/T	21	33857375	33857376	MI0009879	bta-mir-631	+	33857312	33857386	65				Somatic Cell Score	5446
rs461517709	C	C	A/C	21	33857380	33857381	MI0009879	bta-mir-631	+	33857312	33857386	70				Somatic Cell Score	5446
rs481386734	C	C	A/C	21	33857382	33857383	MI0009879	bta-mir-631	+	33857312	33857386	72				Somatic Cell Score	5446
rs442499679	T	T	C/T	21	33857383	33857384	MI0009879	bta-mir-631	+	33857312	33857386	73				Somatic Cell Score	5446
rs462510144	C	C	A/C	21	33857384	33857385	MI0009879	bta-mir-631	+	33857312	33857386	74				Somatic Cell Score	5446
rs447291333	C	C	C/T	21	50310264	50310265	MI0011396	bta-mir-2365	+	50310196	50310274	70				Somatic Cell Score	19042
rs723462238	T	T	C/T	21	50310267	50310268	MI0011396	bta-mir-2365	+	50310196	50310274	73				Somatic Cell Score	19042
rs450034840	T	T	C/T	22	30220245	30220246	MI0010456	bta-mir-1284	+	30220160	30220277	87				Somatic Cell Score	4987
rs468119471	T	T	C/T	22	30220261	30220262	MI0010456	bta-mir-1284	+	30220160	30220277	103				Somatic Cell Score	4987
rs435188031	T	T	G/T	22	30220269	30220270	MI0010456	bta-mir-1284	+	30220160	30220277	111				Somatic Cell Score	4987
rs435235583	A	A	A/C	23	7424225	7424226	MI0011411	bta-mir-2376	-	7424173	7424240	15				Somatic Cell Score	5447
rs483096280	C	C	A/C	23	24308060	24308061	MI0009772	bta-mir-206	+	24308042	24308127	20				Somatic Cell Score	2688
rs519608652	C	C	C/G	23	24308121	24308122	MI0009772	bta-mir-206	+	24308042	24308127	81				Somatic Cell Score	2688
rs470279891	G	G	G/T	23	24312333	24312334	MI0009734	bta-mir-133b	+	24312330	24312413	5				Somatic Cell Score	2688
rs435393848	C	C	A/C	23	24312334	24312335	MI0009734	bta-mir-133b	+	24312330	24312413	6				Somatic Cell Score	2688
rs455367687	G	G	G/T	23	24312338	24312339	MI0009734	bta-mir-133b	+	24312330	24312413	10				Somatic Cell Score	2688
rs472156813	C	C	A/C	23	24312340	24312341	MI0009734	bta-mir-133b	+	24312330	24312413	12				Somatic Cell Score	2688
rs434655611	G	G	G/T	23	24312342	24312343	MI0009734	bta-mir-133b	+	24312330	24312413	14				Somatic Cell Score	2688
rs451460985	T	T	C/G/T	23	24312344	24312345	MI0009734	bta-mir-133b	+	24312330	24312413	16				Somatic Cell Score	2688
rs471397976	A	A	A/C	23	24312348	24312349	MI0009734	bta-mir-133b	+	24312330	24312413	20				Somatic Cell Score	2688
rs443191378	C	C	C/G	23	24312354	24312355	MI0009734	bta-mir-133b	+	24312330	24312413	26				Somatic Cell Score	2688
rs463455024	G	G	A/G	23	24312358	24312359	MI0009734	bta-mir-133b	+	24312330	24312413	30				Somatic Cell Score	2688
rs473919090	T	T	C/G/T	23	24312359	24312360	MI0009734	bta-mir-133b	+	24312330	24312413	31				Somatic Cell Score	2688
rs442293710	T	T	C/T	23	24312363	24312364	MI0009734	bta-mir-133b	+	24312330	24312413	35				Somatic Cell Score	2688
rs462349578	C	C	C/T	23	24312367	24312368	MI0009734	bta-mir-133b	+	24312330	24312413	39				Somatic Cell Score	2688
rs479168450	G	G	C/G/T	23	24312370	24312371	MI0009734	bta-mir-133b	+	24312330	24312413	42				Somatic Cell Score	2688
rs448003785	T	T	G/T	23	24312376	24312377	MI0009734	bta-mir-133b	+	24312330	24312413	48				Somatic Cell Score	2688
rs450056333	C	C	C/G	23	24312410	24312411	MI0009734	bta-mir-133b	+	24312330	24312413	82				Somatic Cell Score	2688
rs463756630	G	G	G/T	23	28202779	28202780	MI0011413	bta-mir-2378	-	28202778	28202855	76				Somatic Cell Score	4989
rs475859354	A	A	A/C	23	28202787	28202788	MI0011413	bta-mir-2378	-	28202778	28202855	68				Somatic Cell Score	4989
rs439773953	C	C	C/G	23	28202816	28202817	MI0011413	bta-mir-2378	-	28202778	28202855	39				Somatic Cell Score	4989
rs478659704	T	T	G/T	23	28202817	28202818	MI0011413	bta-mir-2378	-	28202778	28202855	38				Somatic Cell Score	4989
rs378669736	-	-	-/A	23	28202826	28202826	MI0011413	bta-mir-2378	-	28202778	28202855	29				Somatic Cell Score	4989
rs458345065	A	A	A/G	23	28202844	28202845	MI0011413	bta-mir-2378	-	28202778	28202855	11				Somatic Cell Score	4989
rs480102575	C	C	C/T	23	28202848	28202849	MI0011413	bta-mir-2378	-	28202778	28202855	7				Somatic Cell Score	4989
rs482739269	C	C	A/C	23	28203154	28203155	MI0009903	bta-mir-877	-	28203151	28203252	98				Somatic Cell Score	4989
rs449859330	A	A	A/G/T	23	28203155	28203156	MI0009903	bta-mir-877	-	28203151	28203252	97				Somatic Cell Score	4989
rs465170714	G	G	G/T	23	28203170	28203171	MI0009903	bta-mir-877	-	28203151	28203252	82				Somatic Cell Score	4989
rs477334476	A	A	A/G	23	28203171	28203172	MI0009903	bta-mir-877	-	28203151	28203252	81				Somatic Cell Score	4989
rs447593060	A	A	A/C	23	28203172	28203173	MI0009903	bta-mir-877	-	28203151	28203252	80				Somatic Cell Score	4989
rs466906500	G	G	G/T	23	28203173	28203174	MI0009903	bta-mir-877	-	28203151	28203252	79				Somatic Cell Score	4989
rs434004883	G	G	C/G	23	28203176	28203177	MI0009903	bta-mir-877	-	28203151	28203252	76				Somatic Cell Score	4989
rs455588261	A	A	A/T	23	28203181	28203182	MI0009903	bta-mir-877	-	28203151	28203252	71				Somatic Cell Score	4989
rs467676684	T	T	G/T	23	28203185	28203186	MI0009903	bta-mir-877	-	28203151	28203252	67				Somatic Cell Score	4989
rs380372406	G	G	-/G	23	28203186	28203187	MI0009903	bta-mir-877	-	28203151	28203252	66				Somatic Cell Score	4989
rs438059734	G	G	C/G	23	28203186	28203187	MI0009903	bta-mir-877	-	28203151	28203252	66				Somatic Cell Score	4989
rs456564301	G	G	C/G	23	28203189	28203190	MI0009903	bta-mir-877	-	28203151	28203252	63				Somatic Cell Score	4989
rs436358152	G	G	G/T	23	28203191	28203192	MI0009903	bta-mir-877	-	28203151	28203252	61				Somatic Cell Score	4989
rs432658377	T	T	A/C/T	23	28203192	28203193	MI0009903	bta-mir-877	-	28203151	28203252	60				Somatic Cell Score	4989
rs454446634	C	C	A/C	23	28203193	28203194	MI0009903	bta-mir-877	-	28203151	28203252	59				Somatic Cell Score	4989
rs472892259	C	C	C/G	23	28203195	28203196	MI0009903	bta-mir-877	-	28203151	28203252	57				Somatic Cell Score	4989
rs442416791	G	G	C/G	23	28203196	28203197	MI0009903	bta-mir-877	-	28203151	28203252	56				Somatic Cell Score	4989
rs517108460	-	-	-/C	23	28203198	28203198	MI0009903	bta-mir-877	-	28203151	28203252	54				Somatic Cell Score	4989
rs460948695	A	A	A/C/G	23	28203199	28203200	MI0009903	bta-mir-877	-	28203151	28203252	53				Somatic Cell Score	4989
rs476260315	G	G	C/G	23	28203200	28203201	MI0009903	bta-mir-877	-	28203151	28203252	52				Somatic Cell Score	4989
rs443382067	C	C	A/C	23	28203204	28203205	MI0009903	bta-mir-877	-	28203151	28203252	48				Somatic Cell Score	4989
rs458675084	C	C	C/T	23	28203205	28203206	MI0009903	bta-mir-877	-	28203151	28203252	47				Somatic Cell Score	4989
rs477266520	G	G	G/T	23	28203207	28203208	MI0009903	bta-mir-877	-	28203151	28203252	45				Somatic Cell Score	4989
rs447474733	T	T	A/T	23	28203211	28203212	MI0009903	bta-mir-877	-	28203151	28203252	41				Somatic Cell Score	4989
rs459611190	A	A	A/C/G	23	28203212	28203213	MI0009903	bta-mir-877	-	28203151	28203252	40				Somatic Cell Score	4989
rs481142423	G	G	C/G	23	28203213	28203214	MI0009903	bta-mir-877	-	28203151	28203252	39				Somatic Cell Score	4989
rs456544875	T	T	C/T	23	28203218	28203219	MI0009903	bta-mir-877	-	28203151	28203252	34				Somatic Cell Score	4989
rs467645970	G	G	A/C/G	23	28203219	28203220	MI0009903	bta-mir-877	-	28203151	28203252	33				Somatic Cell Score	4989
rs438053716	T	T	C/G/T	23	28203220	28203221	MI0009903	bta-mir-877	-	28203151	28203252	32				Somatic Cell Score	4989
rs470686572	T	T	C/T	23	28203243	28203244	MI0009903	bta-mir-877	-	28203151	28203252	9				Somatic Cell Score	4989
rs440962546	T	T	C/G/T	23	28203244	28203245	MI0009903	bta-mir-877	-	28203151	28203252	8				Somatic Cell Score	4989
rs459481964	T	T	C/T	23	28203246	28203247	MI0009903	bta-mir-877	-	28203151	28203252	6				Somatic Cell Score	4989
rs481079142	C	C	C/G	23	28203247	28203248	MI0009903	bta-mir-877	-	28203151	28203252	5				Somatic Cell Score	4989
rs448339411	A	A	A/C	23	28203249	28203250	MI0009903	bta-mir-877	-	28203151	28203252	3				Somatic Cell Score	4989
rs461160467	G	G	G/T	23	28203250	28203251	MI0009903	bta-mir-877	-	28203151	28203252	2				Somatic Cell Score	4989
rs452811088	C	C	A/C	23	30788204	30788205	MI0011414	bta-mir-2379	-	30788153	30788230	26				Somatic Cell Score	4989
rs478944063	T	T	A/T	23	30788207	30788208	MI0011414	bta-mir-2379	-	30788153	30788230	23				Somatic Cell Score	4989
rs442625533	C	C	A/C	23	30788216	30788217	MI0011414	bta-mir-2379	-	30788153	30788230	14				Somatic Cell Score	4989
rs461169434	T	T	C/T	23	30788218	30788219	MI0011414	bta-mir-2379	-	30788153	30788230	12				Somatic Cell Score	4989
rs471625793	C	C	C/T	23	30890132	30890133	MI0025527	bta-mir-7857	+	30890110	30890175	24				Somatic Cell Score	4989
rs378504464	A	A	A/C	23	30890140	30890141	MI0025527	bta-mir-7857	+	30890110	30890175	32				Somatic Cell Score	4989
rs380606899	T	T	C/T	23	30890166	30890167	MI0025527	bta-mir-7857	+	30890110	30890175	58				Somatic Cell Score	4989
rs463488652	T	T	A/T	23	31589157	31589158	MI0022331	bta-mir-6531	-	31589157	31589240	83				Somatic Cell Score	2688
rs800040872	T	T	G/T	23	31589164	31589165	MI0022331	bta-mir-6531	-	31589157	31589240	76				Somatic Cell Score	2688
rs209543615	A	A	A/G	23	31589167	31589168	MI0022331	bta-mir-6531	-	31589157	31589240	73				Somatic Cell Score	2688
rs439251409	T	T	A/T	23	31589179	31589180	MI0022331	bta-mir-6531	-	31589157	31589240	61				Somatic Cell Score	2688
rs457711912	T	T	A/T	23	31589181	31589182	MI0022331	bta-mir-6531	-	31589157	31589240	59				Somatic Cell Score	2688
rs477772090	A	A	A/C	23	31589186	31589187	MI0022331	bta-mir-6531	-	31589157	31589240	54				Somatic Cell Score	2688
rs383843074	G	G	A/G	23	31589188	31589189	MI0022331	bta-mir-6531	-	31589157	31589240	52				Somatic Cell Score	2688
rs381341999	A	A	A/G	23	31589190	31589191	MI0022331	bta-mir-6531	-	31589157	31589240	50				Somatic Cell Score	2688
rs469674557	G	G	A/G	23	31589191	31589192	MI0022331	bta-mir-6531	-	31589157	31589240	49				Somatic Cell Score	2688
rs517062177	-	-	-/A	23	31589193	31589193	MI0022331	bta-mir-6531	-	31589157	31589240	47				Somatic Cell Score	2688
rs721376238	A	A	A/C	23	31589200	31589201	MI0022331	bta-mir-6531	-	31589157	31589240	40				Somatic Cell Score	2688
rs448591680	C	C	A/C	23	31589202	31589203	MI0022331	bta-mir-6531	-	31589157	31589240	38				Somatic Cell Score	2688
rs470138520	A	A	A/G	23	31589203	31589204	MI0022331	bta-mir-6531	-	31589157	31589240	37				Somatic Cell Score	2688
rs482110261	C	C	A/C	23	31589204	31589205	MI0022331	bta-mir-6531	-	31589157	31589240	36				Somatic Cell Score	2688
rs378027576	T	T	A/T	23	31589205	31589206	MI0022331	bta-mir-6531	-	31589157	31589240	35				Somatic Cell Score	2688
rs436783540	T	T	C/T	23	31589207	31589208	MI0022331	bta-mir-6531	-	31589157	31589240	33				Somatic Cell Score	2688
rs109094057	G	G	A/G	24	23897927	23897928	MI0022298	bta-mir-2285m-3	-	23897857	23897939	12				Somatic Cell Score	4992
rs715614640	A	A	A/G	25	13790176	13790177	MI0009865	bta-mir-562	-	13790125	13790206	30				Somatic Cell Score	4993
rs476468274	T	T	A/T	25	35300129	35300130	MI0011428	bta-mir-2388	-	35300128	35300206	77				Somatic Cell Score	10347
rs443569374	A	A	A/T	25	35300133	35300134	MI0011428	bta-mir-2388	-	35300128	35300206	73				Somatic Cell Score	10347
rs461908184	A	A	A/C	25	35300134	35300135	MI0011428	bta-mir-2388	-	35300128	35300206	72				Somatic Cell Score	10347
rs483098217	G	G	A/G	25	35300160	35300161	MI0011428	bta-mir-2388	-	35300128	35300206	46				Somatic Cell Score	10347
rs43722771	G	G	A/G	25	35300167	35300168	MI0011428	bta-mir-2388	-	35300128	35300206	39				Somatic Cell Score	10347
rs468740998	T	T	A/T	25	35300168	35300169	MI0011428	bta-mir-2388	-	35300128	35300206	38				Somatic Cell Score	10347
rs451149023	A	A	A/C	26	11288027	11288028	MI0005006	bta-mir-107	-	11287994	11288074	47				Somatic Cell Score	2689
rs473132646	A	A	A/C	26	11288046	11288047	MI0005006	bta-mir-107	-	11287994	11288074	28				Somatic Cell Score	2689
rs440227677	A	A	A/C	26	11288048	11288049	MI0005006	bta-mir-107	-	11287994	11288074	26				Somatic Cell Score	2689
rs461810394	A	A	A/C	26	11288053	11288054	MI0005006	bta-mir-107	-	11287994	11288074	21				Somatic Cell Score	2689
rs480195774	A	A	A/C	26	11288055	11288056	MI0005006	bta-mir-107	-	11287994	11288074	19				Somatic Cell Score	2689
rs442137619	A	A	A/C	26	11288057	11288058	MI0005006	bta-mir-107	-	11287994	11288074	17				Somatic Cell Score	2689
rs463856163	A	A	A/C	26	11288065	11288066	MI0005006	bta-mir-107	-	11287994	11288074	9				Somatic Cell Score	2689
rs482337526	G	G	C/G	26	11288069	11288070	MI0005006	bta-mir-107	-	11287994	11288074	5				Somatic Cell Score	2689
rs446029180	G	G	C/G	26	11288071	11288072	MI0005006	bta-mir-107	-	11287994	11288074	3				Somatic Cell Score	2689
rs464491052	A	A	A/T	26	11288072	11288073	MI0005006	bta-mir-107	-	11287994	11288074	2				Somatic Cell Score	2689
rs480146286	G	G	C/G	26	11288073	11288074	MI0005006	bta-mir-107	-	11287994	11288074	1				Somatic Cell Score	2689
rs458162702	T	T	C/T	29	37319011	37319012	MI0009873	bta-mir-584-7	+	37319000	37319066	13				Somatic Cell Score	2695
rs716602804	G	G	A/G	29	37319012	37319013	MI0009873	bta-mir-584-7	+	37319000	37319066	14				Somatic Cell Score	2695
rs480170999	G	G	C/G/T	29	37319044	37319045	MI0009873	bta-mir-584-7	+	37319000	37319066	46				Somatic Cell Score	2695
rs435063315	G	G	C/G	29	37319045	37319046	MI0009873	bta-mir-584-7	+	37319000	37319066	47				Somatic Cell Score	2695
rs454888141	A	A	A/C	29	37319046	37319047	MI0009873	bta-mir-584-7	+	37319000	37319066	48				Somatic Cell Score	2695
rs474809941	T	T	G/T	29	37319056	37319057	MI0009873	bta-mir-584-7	+	37319000	37319066	58				Somatic Cell Score	2695
rs109007150	T	T	C/T	29	37319064	37319065	MI0009873	bta-mir-584-7	+	37319000	37319066	66				Somatic Cell Score	2695
rs800649888	T	T	C/T	29	40643875	40643876	MI0011448	bta-mir-2405	-	40643870	40643939	64				Somatic Cell Score	2695
rs798927739	C	C	C/T	29	40643916	40643917	MI0011448	bta-mir-2405	-	40643870	40643939	23				Somatic Cell Score	2695
rs436554112	C	C	C/T	4	9585499	9585500	MI0009871	bta-mir-584-5	-	9585459	9585553	54				Somatic Cell Score	2730
rs435243366	T	T	C/T	4	9585503	9585504	MI0009871	bta-mir-584-5	-	9585459	9585553	50				Somatic Cell Score	2730
rs453695340	C	C	A/C	4	9585516	9585517	MI0009871	bta-mir-584-5	-	9585459	9585553	37				Somatic Cell Score	2730
rs472136522	A	A	A/C	4	9585539	9585540	MI0009871	bta-mir-584-5	-	9585459	9585553	14				Somatic Cell Score	2730
rs462468121	T	T	G/T	4	10653537	10653538	MI0009880	bta-mir-653	-	10653527	10653616	79				Somatic Cell Score	2730
rs480883022	C	C	A/C	4	10653538	10653539	MI0009880	bta-mir-653	-	10653527	10653616	78				Somatic Cell Score	2730
rs441401778	G	G	G/T	4	10653546	10653547	MI0009880	bta-mir-653	-	10653527	10653616	70				Somatic Cell Score	2730
rs459901266	A	A	A/C	4	10653550	10653551	MI0009880	bta-mir-653	-	10653527	10653616	66				Somatic Cell Score	2730
rs478395267	A	A	A/C	4	10653566	10653567	MI0009880	bta-mir-653	-	10653527	10653616	50				Somatic Cell Score	2730
rs445317588	T	T	A/G/T	4	10653582	10653583	MI0009880	bta-mir-653	-	10653527	10653616	34				Somatic Cell Score	2730
rs470044225	T	T	A/T	4	10653583	10653584	MI0009880	bta-mir-653	-	10653527	10653616	33				Somatic Cell Score	2730
rs481605081	C	C	C/G	4	10715335	10715336	MI0013052	bta-mir-378-2	+	10715298	10715373	39				Somatic Cell Score	2730
rs448622622	A	A	A/G	4	10715341	10715342	MI0013052	bta-mir-378-2	+	10715298	10715373	45				Somatic Cell Score	2730
rs432724822	T	T	A/T	5	25109059	25109060	MI0005463	bta-mir-331	+	25109057	25109146	4				Somatic Cell Score	20620
rs451517673	T	T	C/T	5	25109060	25109061	MI0005463	bta-mir-331	+	25109057	25109146	5				Somatic Cell Score	20620
rs470073324	G	G	A/G/T	5	25109062	25109063	MI0005463	bta-mir-331	+	25109057	25109146	7				Somatic Cell Score	20620
rs437019934	A	A	A/G	5	25109140	25109141	MI0005463	bta-mir-331	+	25109057	25109146	85				Somatic Cell Score	20620
rs479159991	A	A	A/T	5	25849829	25849830	MI0005030	bta-mir-148b	-	25849764	25849853	24				Somatic Cell Score	20620
rs446078424	A	A	A/T	5	25849834	25849835	MI0005030	bta-mir-148b	-	25849764	25849853	19				Somatic Cell Score	20620
rs438251959	A	A	A/G	5	26157898	26157899	MI0009877	bta-mir-615	-	26157879	26157971	73				Somatic Cell Score	20620
rs456424841	C	C	C/G	5	26157899	26157900	MI0009877	bta-mir-615	-	26157879	26157971	72				Somatic Cell Score	20620
rs474791399	G	G	A/G	5	26157909	26157910	MI0009877	bta-mir-615	-	26157879	26157971	62				Somatic Cell Score	20620
rs442111331	A	A	A/C	5	26157910	26157911	MI0009877	bta-mir-615	-	26157879	26157971	61				Somatic Cell Score	20620
rs460617771	G	G	A/G	5	26157913	26157914	MI0009877	bta-mir-615	-	26157879	26157971	58				Somatic Cell Score	20620
rs472685412	A	A	A/G	5	26157915	26157916	MI0009877	bta-mir-615	-	26157879	26157971	56				Somatic Cell Score	20620
rs522490993	-	-	-/A	5	26157926	26157926	MI0009877	bta-mir-615	-	26157879	26157971	45				Somatic Cell Score	20620
rs135192547	T	T	C/T	5	26157955	26157956	MI0009877	bta-mir-615	-	26157879	26157971	16				Somatic Cell Score	20620
rs446316196	T	T	G/T	5	26199806	26199807	MI0009766	bta-mir-196a-2	-	26199801	26199885	79				Somatic Cell Score	20620
rs464663431	A	A	A/C	5	26199810	26199811	MI0009766	bta-mir-196a-2	-	26199801	26199885	75				Somatic Cell Score	20620
rs445334840	C	C	A/C	5	26199811	26199812	MI0009766	bta-mir-196a-2	-	26199801	26199885	74				Somatic Cell Score	20620
rs437981803	G	G	A/G	5	26199816	26199817	MI0009766	bta-mir-196a-2	-	26199801	26199885	69				Somatic Cell Score	20620
rs456356547	A	A	A/C	5	26199845	26199846	MI0009766	bta-mir-196a-2	-	26199801	26199885	40				Somatic Cell Score	20620
rs468543262	T	T	C/T	5	26199847	26199848	MI0009766	bta-mir-196a-2	-	26199801	26199885	38				Somatic Cell Score	20620
rs435648071	C	C	A/C	5	26199848	26199849	MI0009766	bta-mir-196a-2	-	26199801	26199885	37				Somatic Cell Score	20620
rs444077803	C	C	A/C	5	26199873	26199874	MI0009766	bta-mir-196a-2	-	26199801	26199885	12				Somatic Cell Score	20620
rs462535706	T	T	C/T	5	26199879	26199880	MI0009766	bta-mir-196a-2	-	26199801	26199885	6				Somatic Cell Score	20620
rs450248251	A	A	A/C	5	30251648	30251649	MI0011475	bta-mir-2425	+	30251637	30251717	13				Somatic Cell Score	2659
rs454276859	C	C	C/G	5	30251674	30251675	MI0011475	bta-mir-2425	+	30251637	30251717	39				Somatic Cell Score	2659
rs472710188	A	A	A/C/T	5	30251680	30251681	MI0011475	bta-mir-2425	+	30251637	30251717	45				Somatic Cell Score	2659
rs433246293	C	C	C/T	5	30251682	30251683	MI0011475	bta-mir-2425	+	30251637	30251717	47				Somatic Cell Score	2659
rs451797419	A	A	A/C	5	30251683	30251684	MI0011475	bta-mir-2425	+	30251637	30251717	48				Somatic Cell Score	2659
rs440977053	T	T	G/T	5	30251709	30251710	MI0011475	bta-mir-2425	+	30251637	30251717	74				Somatic Cell Score	2659
rs459508610	T	T	C/T	5	30251716	30251717	MI0011475	bta-mir-2425	+	30251637	30251717	81				Somatic Cell Score	2659
rs443435127	A	A	A/C	5	41964068	41964069	MI0011478	bta-mir-2428	+	41964062	41964126	8				Somatic Cell Score	2659
rs442660551	A	A	A/G	5	41964091	41964092	MI0011478	bta-mir-2428	+	41964062	41964126	31				Somatic Cell Score	2659
rs720384966	G	G	A/G	5	41964115	41964116	MI0011478	bta-mir-2428	+	41964062	41964126	55				Somatic Cell Score	2659
rs465605036	C	C	A/C	5	43233886	43233887	MI0022338	bta-mir-2284z-5	+	43233811	43233890	77				Somatic Cell Score	2659
rs521529657	A	A	A/G	5	43233888	43233889	MI0022338	bta-mir-2284z-5	+	43233811	43233890	79				Somatic Cell Score	2659
rs479056264	C	C	C/T	5	48164008	48164009	MI0009896	bta-mir-763	-	48164007	48164126	118				Somatic Cell Score	20620
rs447563583	T	T	G/T	5	48164013	48164014	MI0009896	bta-mir-763	-	48164007	48164126	113				Somatic Cell Score	20620
rs464494391	A	A	A/G/T	5	48164019	48164020	MI0009896	bta-mir-763	-	48164007	48164126	107				Somatic Cell Score	20620
rs478170890	C	C	C/T	5	48164024	48164025	MI0009896	bta-mir-763	-	48164007	48164126	102				Somatic Cell Score	20620
rs449839776	T	T	G/T	5	48164027	48164028	MI0009896	bta-mir-763	-	48164007	48164126	99				Somatic Cell Score	20620
rs469972171	C	C	C/G	5	48164030	48164031	MI0009896	bta-mir-763	-	48164007	48164126	96				Somatic Cell Score	20620
rs435234738	G	G	G/T	5	48164033	48164034	MI0009896	bta-mir-763	-	48164007	48164126	93				Somatic Cell Score	20620
rs455314475	C	C	A/C	5	48164044	48164045	MI0009896	bta-mir-763	-	48164007	48164126	82				Somatic Cell Score	20620
rs465575290	T	T	G/T	5	48164045	48164046	MI0009896	bta-mir-763	-	48164007	48164126	81				Somatic Cell Score	20620
rs519439402	-	-	-/G	5	48164046	48164046	MI0009896	bta-mir-763	-	48164007	48164126	80				Somatic Cell Score	20620
rs434381219	C	C	C/G	5	48164048	48164049	MI0009896	bta-mir-763	-	48164007	48164126	78				Somatic Cell Score	20620
rs456531022	T	T	G/T	5	48164049	48164050	MI0009896	bta-mir-763	-	48164007	48164126	77				Somatic Cell Score	20620
rs471274482	G	G	G/T	5	48164050	48164051	MI0009896	bta-mir-763	-	48164007	48164126	76				Somatic Cell Score	20620
rs439893358	A	A	A/G	5	48164053	48164054	MI0009896	bta-mir-763	-	48164007	48164126	73				Somatic Cell Score	20620
rs456674708	G	G	C/G	5	48164055	48164056	MI0009896	bta-mir-763	-	48164007	48164126	71				Somatic Cell Score	20620
rs476876664	C	C	A/C/G	5	48164056	48164057	MI0009896	bta-mir-763	-	48164007	48164126	70				Somatic Cell Score	20620
rs442101578	A	A	A/G	5	48164057	48164058	MI0009896	bta-mir-763	-	48164007	48164126	69				Somatic Cell Score	20620
rs462273744	A	A	A/G	5	48164059	48164060	MI0009896	bta-mir-763	-	48164007	48164126	67				Somatic Cell Score	20620
rs522982446	-	-	-/G	5	48164060	48164060	MI0009896	bta-mir-763	-	48164007	48164126	66				Somatic Cell Score	20620
rs478993062	C	C	C/G	5	48164061	48164062	MI0009896	bta-mir-763	-	48164007	48164126	65				Somatic Cell Score	20620
rs526519233	-	-	-/A	5	48164063	48164063	MI0009896	bta-mir-763	-	48164007	48164126	63				Somatic Cell Score	20620
rs441210119	A	A	A/C	5	48164063	48164064	MI0009896	bta-mir-763	-	48164007	48164126	63				Somatic Cell Score	20620
rs458155324	A	A	A/C	5	48164064	48164065	MI0009896	bta-mir-763	-	48164007	48164126	62				Somatic Cell Score	20620
rs518910265	-	-	-/G	5	48164065	48164065	MI0009896	bta-mir-763	-	48164007	48164126	61				Somatic Cell Score	20620
rs478101588	G	G	A/C/G	5	48164066	48164067	MI0009896	bta-mir-763	-	48164007	48164126	60				Somatic Cell Score	20620
rs458092160	T	T	C/T	5	48164092	48164093	MI0009896	bta-mir-763	-	48164007	48164126	34				Somatic Cell Score	20620
rs471813574	A	A	A/T	5	48164094	48164095	MI0009896	bta-mir-763	-	48164007	48164126	32				Somatic Cell Score	20620
rs443511385	A	A	A/G	5	48164095	48164096	MI0009896	bta-mir-763	-	48164007	48164126	31				Somatic Cell Score	20620
rs463653384	C	C	C/T	5	48164097	48164098	MI0009896	bta-mir-763	-	48164007	48164126	29				Somatic Cell Score	20620
rs480564422	A	A	A/C/T	5	48164101	48164102	MI0009896	bta-mir-763	-	48164007	48164126	25				Somatic Cell Score	20620
rs448967171	C	C	C/G	5	48164110	48164111	MI0009896	bta-mir-763	-	48164007	48164126	16				Somatic Cell Score	20620
rs459385450	C	C	A/C	5	48164115	48164116	MI0009896	bta-mir-763	-	48164007	48164126	11				Somatic Cell Score	20620
rs464580197	C	C	A/C	5	48952342	48952343	MI0011479	bta-mir-2429	-	48952298	48952372	30				Somatic Cell Score	20620
rs433140538	T	T	A/T	5	48952367	48952368	MI0011479	bta-mir-2429	-	48952298	48952372	5				Somatic Cell Score	20620
rs459775330	C	C	C/T	5	51209100	51209101	MI0005065	bta-let-7i	-	51209081	51209164	64				Somatic Cell Score	20620
rs481685896	C	C	C/G	5	51209112	51209113	MI0005065	bta-let-7i	-	51209081	51209164	52				Somatic Cell Score	20620
rs448558111	C	C	C/T	5	51209127	51209128	MI0005065	bta-let-7i	-	51209081	51209164	37				Somatic Cell Score	20620
rs463898326	C	C	C/G	5	51209131	51209132	MI0005065	bta-let-7i	-	51209081	51209164	33				Somatic Cell Score	20620
rs482363576	A	A	A/C	5	51209134	51209135	MI0005065	bta-let-7i	-	51209081	51209164	30				Somatic Cell Score	20620
rs109790808	A	A	A/G	5	56293173	56293174	MI0011480	bta-mir-2430	-	56293171	56293243	70				Somatic Cell Score	20620
rs469690151	A	A	A/T	5	56293194	56293195	MI0011480	bta-mir-2430	-	56293171	56293243	49				Somatic Cell Score	20620
rs473405513	T	T	C/T	5	56293237	56293238	MI0011480	bta-mir-2430	-	56293171	56293243	6				Somatic Cell Score	20620
rs208279052	A	A	A/G	5	56655725	56655726	MI0011481	bta-mir-2431	-	56655700	56655767	42				Somatic Cell Score	20620
rs109256956	C	C	C/T	5	56655729	56655730	MI0011481	bta-mir-2431	-	56655700	56655767	38				Somatic Cell Score	20620
rs476865546	G	G	A/G	5	57337627	57337628	MI0011483	bta-mir-2432	-	57337563	57337633	6				Somatic Cell Score	20620
rs447322344	A	A	A/G	5	57337630	57337631	MI0011483	bta-mir-2432	-	57337563	57337633	3				Somatic Cell Score	20620
rs472362107	T	T	C/T	5	57337631	57337632	MI0011483	bta-mir-2432	-	57337563	57337633	2				Somatic Cell Score	20620
rs476453427	G	G	G/T	5	57400217	57400218	MI0011484	bta-mir-2433	-	57400205	57400281	64				Somatic Cell Score	20620
rs443448382	G	G	C/G	5	57400231	57400232	MI0011484	bta-mir-2433	-	57400205	57400281	50				Somatic Cell Score	20620
rs458695980	T	T	G/T	5	57400233	57400234	MI0011484	bta-mir-2433	-	57400205	57400281	48				Somatic Cell Score	20620
rs471585351	T	T	C/T	5	57400241	57400242	MI0011484	bta-mir-2433	-	57400205	57400281	40				Somatic Cell Score	20620
rs438792692	A	A	A/C	5	57400246	57400247	MI0011484	bta-mir-2433	-	57400205	57400281	35				Somatic Cell Score	20620
rs720837439	CTT	CTT	-/CTT	5	62043171	62043174	MI0010467	bta-mir-1251	+	62043143	62043212	32				Somatic Cell Score	20620
rs473117894	T	T	C/T	5	64962179	64962180	MI0011485	bta-mir-2434	-	64962168	64962241	62				Somatic Cell Score	20620
rs441801811	T	T	C/T	5	64962181	64962182	MI0011485	bta-mir-2434	-	64962168	64962241	60				Somatic Cell Score	20620
rs482100722	A	A	A/T	5	64962237	64962238	MI0011485	bta-mir-2434	-	64962168	64962241	4				Somatic Cell Score	20620
rs435234395	A	A	A/G	5	104262199	104262200	MI0011474	bta-mir-2424	-	104262188	104262267	68				Somatic Cell Score	32257
rs439014293	G	G	G/T	7	12915073	12915074	MI0005032	bta-mir-181c	+	12915072	12915168	3				Somatic Cell Score	3537
rs457574651	C	C	C/G	7	12915074	12915075	MI0005032	bta-mir-181c	+	12915072	12915168	4				Somatic Cell Score	3537
rs475849265	A	A	A/G	7	12915076	12915077	MI0005032	bta-mir-181c	+	12915072	12915168	6				Somatic Cell Score	3537
rs442904049	G	G	G/T	7	12915078	12915079	MI0005032	bta-mir-181c	+	12915072	12915168	8				Somatic Cell Score	3537
rs461314375	G	G	C/G	7	12915079	12915080	MI0005032	bta-mir-181c	+	12915072	12915168	9				Somatic Cell Score	3537
rs479842535	G	G	G/T	7	12915080	12915081	MI0005032	bta-mir-181c	+	12915072	12915168	10				Somatic Cell Score	3537
rs440426472	T	T	G/T	7	12915082	12915083	MI0005032	bta-mir-181c	+	12915072	12915168	12				Somatic Cell Score	3537
rs477158013	C	C	A/C	7	12915116	12915117	MI0005032	bta-mir-181c	+	12915072	12915168	46				Somatic Cell Score	3537
rs518255176	C	C	-/C	7	12915119	12915120	MI0005032	bta-mir-181c	+	12915072	12915168	49				Somatic Cell Score	3537
rs450552295	T	T	G/T	7	12915132	12915133	MI0005032	bta-mir-181c	+	12915072	12915168	62				Somatic Cell Score	3537
rs462593796	C	C	C/G	7	12915133	12915134	MI0005032	bta-mir-181c	+	12915072	12915168	63				Somatic Cell Score	3537
rs481125919	A	A	A/G	7	12915135	12915136	MI0005032	bta-mir-181c	+	12915072	12915168	65				Somatic Cell Score	3537
rs448111013	T	T	G/T	7	12915144	12915145	MI0005032	bta-mir-181c	+	12915072	12915168	74				Somatic Cell Score	3537
rs466712485	G	G	A/G/T	7	12915146	12915147	MI0005032	bta-mir-181c	+	12915072	12915168	76				Somatic Cell Score	3537
rs433554209	A	A	A/G	7	12915147	12915148	MI0005032	bta-mir-181c	+	12915072	12915168	77				Somatic Cell Score	3537
rs445702482	C	C	C/G	7	12915151	12915152	MI0005032	bta-mir-181c	+	12915072	12915168	81				Somatic Cell Score	3537
rs465661308	G	G	A/G	7	12915152	12915153	MI0005032	bta-mir-181c	+	12915072	12915168	82				Somatic Cell Score	3537
rs432644110	T	T	G/T	7	12915164	12915165	MI0005032	bta-mir-181c	+	12915072	12915168	94				Somatic Cell Score	3537
rs457486947	C	C	C/G	7	12915166	12915167	MI0005032	bta-mir-181c	+	12915072	12915168	96				Somatic Cell Score	3537
rs444428351	G	G	C/G	7	12915262	12915263	MI0009754	bta-mir-181d	+	12915238	12915350	26				Somatic Cell Score	3537
rs462667473	A	A	A/T	7	12915265	12915266	MI0009754	bta-mir-181d	+	12915238	12915350	29				Somatic Cell Score	3537
rs474967523	C	C	C/G	7	12915270	12915271	MI0009754	bta-mir-181d	+	12915238	12915350	34				Somatic Cell Score	3537
rs136685615	A	A	G/T	7	12915313	12915314	MI0009754	bta-mir-181d	+	12915238	12915350	77				Somatic Cell Score	3537
rs482601875	A	A	A/C	7	12915330	12915331	MI0009754	bta-mir-181d	+	12915238	12915350	94				Somatic Cell Score	3537
rs449746717	T	T	G/T	7	12915332	12915333	MI0009754	bta-mir-181d	+	12915238	12915350	96				Somatic Cell Score	3537
rs460568804	A	A	A/G	7	12981693	12981694	MI0005053	bta-mir-24-2	-	12981642	12981713	20				Somatic Cell Score	3537
rs479182035	T	T	C/T	7	12981695	12981696	MI0005053	bta-mir-24-2	-	12981642	12981713	18				Somatic Cell Score	3537
rs446019345	A	A	A/G	7	12981711	12981712	MI0005053	bta-mir-24-2	-	12981642	12981713	2				Somatic Cell Score	3537
rs475360122	C	C	C/G/T	7	12981795	12981796	MI0004746	bta-mir-27a	-	12981791	12981868	73				Somatic Cell Score	3537
rs483050432	A	A	A/G	7	12981816	12981817	MI0004746	bta-mir-27a	-	12981791	12981868	52				Somatic Cell Score	3537
rs450078755	G	G	C/G/T	7	12981818	12981819	MI0004746	bta-mir-27a	-	12981791	12981868	50				Somatic Cell Score	3537
rs468399328	A	A	A/G	7	12981819	12981820	MI0004746	bta-mir-27a	-	12981791	12981868	49				Somatic Cell Score	3537
rs480572233	A	A	A/G	7	12981824	12981825	MI0004746	bta-mir-27a	-	12981791	12981868	44				Somatic Cell Score	3537
rs447358972	C	C	C/G	7	12981831	12981832	MI0004746	bta-mir-27a	-	12981791	12981868	37				Somatic Cell Score	3537
rs466013581	C	C	C/G	7	12981832	12981833	MI0004746	bta-mir-27a	-	12981791	12981868	36				Somatic Cell Score	3537
rs432822761	T	T	C/T	7	12981833	12981834	MI0004746	bta-mir-27a	-	12981791	12981868	35				Somatic Cell Score	3537
rs436715853	T	T	C/T	7	12981857	12981858	MI0004746	bta-mir-27a	-	12981791	12981868	11				Somatic Cell Score	3537
rs716561517	G	G	A/G	7	12981973	12981974	MI0005042	bta-mir-23a	-	12981970	12982042	69				Somatic Cell Score	3537
rs456742200	T	T	A/T	7	12981999	12982000	MI0005042	bta-mir-23a	-	12981970	12982042	43				Somatic Cell Score	3537
rs454226390	G	G	A/G	7	12982000	12982001	MI0005042	bta-mir-23a	-	12981970	12982042	42				Somatic Cell Score	3537
rs472837897	T	T	G/T	7	12982001	12982002	MI0005042	bta-mir-23a	-	12981970	12982042	41				Somatic Cell Score	3537
rs439724897	T	T	C/T	7	12982020	12982021	MI0005042	bta-mir-23a	-	12981970	12982042	22				Somatic Cell Score	3537
rs477805100	C	C	A/C	7	15917819	15917820	MI0011511	bta-mir-2454	-	15917819	15917890	71				Somatic Cell Score	3537
rs466514710	G	G	G/T	7	15917852	15917853	MI0011511	bta-mir-2454	-	15917819	15917890	38				Somatic Cell Score	3537
rs435088600	C	C	C/G	7	15917856	15917857	MI0011511	bta-mir-2454	-	15917819	15917890	34				Somatic Cell Score	3537
rs465345740	C	C	A/C	7	15917883	15917884	MI0011511	bta-mir-2454	-	15917819	15917890	7				Somatic Cell Score	3537
rs437168763	C	C	A/C	7	15917885	15917886	MI0011511	bta-mir-2454	-	15917819	15917890	5				Somatic Cell Score	3537
rs457405815	G	G	G/T	7	15917889	15917890	MI0011511	bta-mir-2454	-	15917819	15917890	1				Somatic Cell Score	3537
rs475123291	C	C	C/T	7	16508922	16508923	MI0015950	bta-mir-3604-1	+	16508922	16508999	2				Somatic Cell Score	3537
rs440529546	G	G	G/T	7	16508925	16508926	MI0009770	bta-mir-199a-2	-	16508926	16508996	71				Somatic Cell Score	3537
rs440529546	G	G	G/T	7	16508925	16508926	MI0015950	bta-mir-3604-1	+	16508922	16508999	5				Somatic Cell Score	3537
rs468178538	C	C	C/T	7	16508951	16508952	MI0009770	bta-mir-199a-2	-	16508926	16508996	45				Somatic Cell Score	3537
rs468178538	C	C	C/T	7	16508951	16508952	MI0015950	bta-mir-3604-1	+	16508922	16508999	31				Somatic Cell Score	3537
rs478730338	A	A	A/C	7	16508952	16508953	MI0009770	bta-mir-199a-2	-	16508926	16508996	44				Somatic Cell Score	3537
rs478730338	A	A	A/C	7	16508952	16508953	MI0015950	bta-mir-3604-1	+	16508922	16508999	32				Somatic Cell Score	3537
rs447404151	A	A	A/C	7	16508960	16508961	MI0009770	bta-mir-199a-2	-	16508926	16508996	36				Somatic Cell Score	3537
rs447404151	A	A	A/C	7	16508960	16508961	MI0015950	bta-mir-3604-1	+	16508922	16508999	40				Somatic Cell Score	3537
rs464324174	G	G	G/T	7	16508961	16508962	MI0009770	bta-mir-199a-2	-	16508926	16508996	35				Somatic Cell Score	3537
rs464324174	G	G	G/T	7	16508961	16508962	MI0015950	bta-mir-3604-1	+	16508922	16508999	41				Somatic Cell Score	3537
rs432958657	C	C	A/C	7	16508964	16508965	MI0009770	bta-mir-199a-2	-	16508926	16508996	32				Somatic Cell Score	3537
rs432958657	C	C	A/C	7	16508964	16508965	MI0015950	bta-mir-3604-1	+	16508922	16508999	44				Somatic Cell Score	3537
rs456385299	C	C	A/C	7	16508965	16508966	MI0009770	bta-mir-199a-2	-	16508926	16508996	31				Somatic Cell Score	3537
rs456385299	C	C	A/C	7	16508965	16508966	MI0015950	bta-mir-3604-1	+	16508922	16508999	45				Somatic Cell Score	3537
rs470097803	T	T	G/T	7	16508967	16508968	MI0009770	bta-mir-199a-2	-	16508926	16508996	29				Somatic Cell Score	3537
rs470097803	T	T	G/T	7	16508967	16508968	MI0015950	bta-mir-3604-1	+	16508922	16508999	47				Somatic Cell Score	3537
rs435521790	A	A	A/C	7	16508970	16508971	MI0015950	bta-mir-3604-1	+	16508922	16508999	50				Somatic Cell Score	3537
rs454902989	C	C	C/G	7	16508971	16508972	MI0015950	bta-mir-3604-1	+	16508922	16508999	51				Somatic Cell Score	3537
rs475037933	G	G	G/T	7	16508973	16508974	MI0015950	bta-mir-3604-1	+	16508922	16508999	53				Somatic Cell Score	3537
rs440461652	G	G	C/G	7	16508974	16508975	MI0015950	bta-mir-3604-1	+	16508922	16508999	54				Somatic Cell Score	3537
rs454086833	A	A	A/T	7	16508976	16508977	MI0015950	bta-mir-3604-1	+	16508922	16508999	56				Somatic Cell Score	3537
rs470960780	G	G	C/G	7	16508981	16508982	MI0015950	bta-mir-3604-1	+	16508922	16508999	61				Somatic Cell Score	3537
rs439759364	A	A	A/C	7	16508983	16508984	MI0015950	bta-mir-3604-1	+	16508922	16508999	63				Somatic Cell Score	3537
rs463026768	T	T	G/T	7	16508987	16508988	MI0015950	bta-mir-3604-1	+	16508922	16508999	67				Somatic Cell Score	3537
rs483302479	G	G	G/T	7	16508990	16508991	MI0015950	bta-mir-3604-1	+	16508922	16508999	70				Somatic Cell Score	3537
rs442317299	T	T	A/T	7	16508991	16508992	MI0015950	bta-mir-3604-1	+	16508922	16508999	71				Somatic Cell Score	3537
rs461729025	G	G	C/G	7	16508994	16508995	MI0009770	bta-mir-199a-2	-	16508926	16508996	2				Somatic Cell Score	3537
rs461729025	G	G	C/G	7	16508994	16508995	MI0015950	bta-mir-3604-1	+	16508922	16508999	74				Somatic Cell Score	3537
rs454326158	C	C	A/C	7	16664640	16664641	MI0013055	bta-mir-2882	+	16664593	16664650	49				Somatic Cell Score	3537
rs433998800	C	C	A/C	7	17935950	17935951	MI0011512	bta-mir-2455	-	17935950	17936025	75				Somatic Cell Score	3537
rs456176664	G	G	C/G	7	17935983	17935984	MI0011512	bta-mir-2455	-	17935950	17936025	42				Somatic Cell Score	3537
rs476183900	T	T	C/T	7	17935985	17935986	MI0011512	bta-mir-2455	-	17935950	17936025	40				Somatic Cell Score	3537
rs441908865	A	A	A/G	7	17935993	17935994	MI0011512	bta-mir-2455	-	17935950	17936025	32				Somatic Cell Score	3537
rs462087121	A	A	A/T	7	17936008	17936009	MI0011512	bta-mir-2455	-	17935950	17936025	17				Somatic Cell Score	3537
rs478929089	G	G	A/G	7	17936023	17936024	MI0011512	bta-mir-2455	-	17935950	17936025	2				Somatic Cell Score	3537
rs467350065	T	T	C/T	7	18379983	18379984	MI0011513	bta-mir-339b	-	18379980	18380037	54				Somatic Cell Score	3537
rs481094525	A	A	A/C	7	18379993	18379994	MI0011513	bta-mir-339b	-	18379980	18380037	44				Somatic Cell Score	3537
rs449536764	C	C	A/C	7	18379995	18379996	MI0011513	bta-mir-339b	-	18379980	18380037	42				Somatic Cell Score	3537
rs466452020	A	A	A/G	7	18380001	18380002	MI0011513	bta-mir-339b	-	18379980	18380037	36				Somatic Cell Score	3537
rs434933951	C	C	C/G	7	18380006	18380007	MI0011513	bta-mir-339b	-	18379980	18380037	31				Somatic Cell Score	3537
rs451830742	A	A	A/C	7	18380010	18380011	MI0011513	bta-mir-339b	-	18379980	18380037	27				Somatic Cell Score	3537
rs379514363	C	C	C/T	7	18970222	18970223	MI0022340	bta-mir-6535	-	18970183	18970255	33				Somatic Cell Score	3537
rs516289394	G	G	A/G	7	19075194	19075195	MI0031505	bta-mir-3432b	-	19075177	19075273	79				Somatic Cell Score	3537
rs461644733	A	A	A/G	7	19075209	19075210	MI0031505	bta-mir-3432b	-	19075177	19075273	64				Somatic Cell Score	3537
rs480099910	C	C	A/C	7	19075212	19075213	MI0031505	bta-mir-3432b	-	19075177	19075273	61				Somatic Cell Score	3537
rs521318566	C	C	A/C	7	19075255	19075256	MI0031505	bta-mir-3432b	-	19075177	19075273	18				Somatic Cell Score	3537
rs469198527	C	C	A/C	7	19075256	19075257	MI0031505	bta-mir-3432b	-	19075177	19075273	17				Somatic Cell Score	3537
rs478093186	A	A	A/T	7	19075259	19075260	MI0031505	bta-mir-3432b	-	19075177	19075273	14				Somatic Cell Score	3537
rs524892045	C	C	A/C	7	19075261	19075262	MI0031505	bta-mir-3432b	-	19075177	19075273	12				Somatic Cell Score	3537
rs518349217	A	A	A/G	7	19075262	19075263	MI0031505	bta-mir-3432b	-	19075177	19075273	11				Somatic Cell Score	3537
rs445088706	A	A	A/G	7	19075264	19075265	MI0031505	bta-mir-3432b	-	19075177	19075273	9				Somatic Cell Score	3537
rs480938143	A	A	A/C	7	20584209	20584210	MI0005056	bta-mir-7-3	-	20584157	20584238	29				Somatic Cell Score	3537
rs450896821	C	C	C/G	7	20584210	20584211	MI0005056	bta-mir-7-3	-	20584157	20584238	28				Somatic Cell Score	3537
rs383940441	C	C	C/T	7	20584226	20584227	MI0005056	bta-mir-7-3	-	20584157	20584238	12				Somatic Cell Score	3537
rs721677689	T	T	C/T	7	21255430	21255431	MI0011514	bta-mir-1434	+	21255389	21255461	43				Somatic Cell Score	3537
rs472123559	C	C	C/G	7	21271940	21271941	MI0011515	bta-mir-2456	+	21271931	21272002	11				Somatic Cell Score	3537
rs208980641	G	G	A/G	7	21271949	21271950	MI0011515	bta-mir-2456	+	21271931	21272002	20				Somatic Cell Score	3537
rs455176960	T	T	A/T	7	21272001	21272002	MI0011515	bta-mir-2456	+	21271931	21272002	72				Somatic Cell Score	3537
rs462580936	T	T	G/T	7	28718788	28718789	MI0011517	bta-mir-2458	-	28718743	28718809	21				Somatic Cell Score	2667
rs476348887	T	T	A/T	7	28718789	28718790	MI0011517	bta-mir-2458	-	28718743	28718809	20				Somatic Cell Score	2667
rs438355367	A	A	A/C	7	28718799	28718800	MI0011517	bta-mir-2458	-	28718743	28718809	10				Somatic Cell Score	2667
rs436414148	A	A	A/C	7	39194948	39194949	MI0010480	bta-mir-1271	+	39194948	39195033	2				Somatic Cell Score	2667
rs436812147	C	C	C/G	7	39194990	39194991	MI0010480	bta-mir-1271	+	39194948	39195033	44				Somatic Cell Score	2667
rs383036371	G	G	A/G	8	13102615	13102616	MI0022309	bta-mir-2285m-5	+	13102606	13102686	11				Somatic Cell Score	4979
rs432123294	T	T	A/T	8	15159560	15159561	MI0009899	bta-mir-873	+	15159560	15159636	2				Somatic Cell Score	4979
rs469207506	G	G	G/T	8	15159561	15159562	MI0009899	bta-mir-873	+	15159560	15159636	3				Somatic Cell Score	4979
rs457260777	T	T	C/T	8	15159562	15159563	MI0009899	bta-mir-873	+	15159560	15159636	4				Somatic Cell Score	4979
rs436455255	G	G	G/T	8	15159563	15159564	MI0009899	bta-mir-873	+	15159560	15159636	5				Somatic Cell Score	4979
rs473605898	A	A	A/C	8	15159628	15159629	MI0009899	bta-mir-873	+	15159560	15159636	70				Somatic Cell Score	4979
rs460255438	C	C	A/C	8	15183292	15183293	MI0009902	bta-mir-876	+	15183224	15183304	70				Somatic Cell Score	4979
rs520916196	G	G	A/G	8	46941391	46941392	MI0021132	bta-mir-2285i	+	46941385	46941462	8				Somatic Cell Score	19032
rs516493471	A	A	A/G	8	46941432	46941433	MI0021132	bta-mir-2285i	+	46941385	46941462	49				Somatic Cell Score	19032
rs447450712	T	T	G/T	8	47259539	47259540	MI0005462	bta-mir-204	-	47259539	47259634	95				Somatic Cell Score	19032
rs477851179	T	T	A/T	8	47259621	47259622	MI0005462	bta-mir-204	-	47259539	47259634	13				Somatic Cell Score	19032
rs469842494	C	C	C/G	8	47259622	47259623	MI0005462	bta-mir-204	-	47259539	47259634	12				Somatic Cell Score	19032
rs450392357	C	C	C/T	8	47259624	47259625	MI0005462	bta-mir-204	-	47259539	47259634	10				Somatic Cell Score	19032
rs435765282	A	A	A/C	8	47259625	47259626	MI0005462	bta-mir-204	-	47259539	47259634	9				Somatic Cell Score	19032
rs466102793	T	T	G/T	8	47259626	47259627	MI0005462	bta-mir-204	-	47259539	47259634	8				Somatic Cell Score	19032
rs470390218	G	G	G/T	X	20461136	20461137	MI0011546	bta-mir-2484	-	20461131	20461206	70				Somatic Cell Score	32256
rs437329008	A	A	A/G	X	20461137	20461138	MI0011546	bta-mir-2484	-	20461131	20461206	69				Somatic Cell Score	32256
rs446183055	T	T	G/T	X	20461138	20461139	MI0011546	bta-mir-2484	-	20461131	20461206	68				Somatic Cell Score	32256
rs464623203	C	C	A/C	X	20461139	20461140	MI0011546	bta-mir-2484	-	20461131	20461206	67				Somatic Cell Score	32256
rs436280731	C	C	C/G/T	X	20461167	20461168	MI0011546	bta-mir-2484	-	20461131	20461206	39				Somatic Cell Score	32256
rs454676856	T	T	A/T	X	20461168	20461169	MI0011546	bta-mir-2484	-	20461131	20461206	38				Somatic Cell Score	32256
rs476190268	A	A	A/T	X	20461173	20461174	MI0011546	bta-mir-2484	-	20461131	20461206	33				Somatic Cell Score	32256
rs443358398	C	C	A/C	X	20461184	20461185	MI0011546	bta-mir-2484	-	20461131	20461206	22				Somatic Cell Score	32256
rs458493897	T	T	C/T	X	20461187	20461188	MI0011546	bta-mir-2484	-	20461131	20461206	19				Somatic Cell Score	32256
rs470471325	A	A	A/C	X	20461190	20461191	MI0011546	bta-mir-2484	-	20461131	20461206	16				Somatic Cell Score	32256
rs440799635	T	T	C/T	X	20461191	20461192	MI0011546	bta-mir-2484	-	20461131	20461206	15				Somatic Cell Score	32256
rs459345841	C	C	A/C	X	20461193	20461194	MI0011546	bta-mir-2484	-	20461131	20461206	13				Somatic Cell Score	32256
rs481815397	C	C	C/T	X	20461199	20461200	MI0011546	bta-mir-2484	-	20461131	20461206	7				Somatic Cell Score	32256
rs448751215	A	A	A/T	X	20461200	20461201	MI0011546	bta-mir-2484	-	20461131	20461206	6				Somatic Cell Score	32256
rs463951242	G	G	C/G	X	20461201	20461202	MI0011546	bta-mir-2484	-	20461131	20461206	5				Somatic Cell Score	32256
rs482430030	A	A	A/G	X	20461205	20461206	MI0011546	bta-mir-2484	-	20461131	20461206	1				Somatic Cell Score	32256
rs478343723	C	C	C/T	10	42712645	42712646	MI0022268	bta-mir-6517	+	42712635	42712712	12	bta-miR-6517	0		Somatic Cell Score	3436
rs468283140	C	C	A/C	10	42712666	42712667	MI0022268	bta-mir-6517	+	42712635	42712712	33	bta-miR-6517	21		Somatic Cell Score	3436
rs435521018	G	G	G/T	10	42712667	42712668	MI0022268	bta-mir-6517	+	42712635	42712712	34	bta-miR-6517	22		Somatic Cell Score	3436
rs437996939	T	T	A/T	10	47321095	47321096	MI0009762	bta-mir-190a	-	47321061	47321145	50				SCC	1692	Somatic Cell Score	3436
rs460322325	G	G	A/G	10	47321138	47321139	MI0009762	bta-mir-190a	-	47321061	47321145	7				SCC	1692	Somatic Cell Score	3436
rs523158140	C	C	-/C	10	47321143	47321144	MI0009762	bta-mir-190a	-	47321061	47321145	2				SCC	1692	Somatic Cell Score	3436
rs135483577	A	A	A/G	13	39836889	39836890	MI0011318	bta-mir-2305	+	39836873	39836938	18	bta-miR-2305	13		Somatic Cell Score	4983
rs721515528	G	G	C/G	13	39836891	39836892	MI0011318	bta-mir-2305	+	39836873	39836938	20	bta-miR-2305	15		Somatic Cell Score	4983
rs455137965	G	G	C/G	13	39836895	39836896	MI0011318	bta-mir-2305	+	39836873	39836938	24	bta-miR-2305	19		Somatic Cell Score	4983
rs456690846	G	G	A/G	13	47087698	47087699	MI0022276	bta-mir-2285m-2	-	47087660	47087740	42				Somatic Cell Score	4983
rs476958360	A	A	A/C	13	47087701	47087702	MI0022276	bta-mir-2285m-2	-	47087660	47087740	39				Somatic Cell Score	4983
rs442267741	C	C	C/T	13	47087702	47087703	MI0022276	bta-mir-2285m-2	-	47087660	47087740	38				Somatic Cell Score	4983
rs462124377	G	G	A/G	13	47087707	47087708	MI0022276	bta-mir-2285m-2	-	47087660	47087740	33				Somatic Cell Score	4983
rs525969814	G	G	-/G	13	47087707	47087708	MI0022276	bta-mir-2285m-2	-	47087660	47087740	33				Somatic Cell Score	4983
rs479102252	A	A	A/C	13	47087711	47087712	MI0022276	bta-mir-2285m-2	-	47087660	47087740	29				Somatic Cell Score	4983
rs441157738	C	C	A/C	13	47087714	47087715	MI0022276	bta-mir-2285m-2	-	47087660	47087740	26				Somatic Cell Score	4983
rs458112127	T	T	A/T	13	47087718	47087719	MI0022276	bta-mir-2285m-2	-	47087660	47087740	22				Somatic Cell Score	4983
rs449954218	G	G	A/G/T	13	47087719	47087720	MI0022276	bta-mir-2285m-2	-	47087660	47087740	21				Somatic Cell Score	4983
rs445825644	A	A	A/C/T	13	47087721	47087722	MI0022276	bta-mir-2285m-2	-	47087660	47087740	19				Somatic Cell Score	4983
rs469166012	C	C	C/T	13	47087722	47087723	MI0022276	bta-mir-2285m-2	-	47087660	47087740	18				Somatic Cell Score	4983
rs482997840	G	G	C/G	13	47087729	47087730	MI0022276	bta-mir-2285m-2	-	47087660	47087740	11				Somatic Cell Score	4983
rs448320097	C	C	C/T	13	47087730	47087731	MI0022276	bta-mir-2285m-2	-	47087660	47087740	10				Somatic Cell Score	4983
rs135878508	C	C	C/T	13	47087731	47087732	MI0022276	bta-mir-2285m-2	-	47087660	47087740	9				Somatic Cell Score	4983
rs440019364	T	T	G/T	13	51742423	51742424	MI0005456	bta-mir-103-2	-	51742422	51742497	74				Somatic Cell Score	2775
rs455844741	A	A	A/G	13	51742466	51742467	MI0005456	bta-mir-103-2	-	51742422	51742497	31				Somatic Cell Score	2775
rs477213889	A	A	A/C	13	51742488	51742489	MI0005456	bta-mir-103-2	-	51742422	51742497	9				Somatic Cell Score	2775
rs462631789	C	C	C/T	13	55227360	55227361	MI0025193	bta-mir-133c	+	55227289	55227382	73	bta-miR-133c	16		Somatic Cell Score	2775
rs471421318	G	G	G/T	13	55227362	55227363	MI0025193	bta-mir-133c	+	55227289	55227382	75	bta-miR-133c	18		Somatic Cell Score	2775
rs443994813	A	A	A/T	13	55237555	55237556	MI0009719	bta-mir-1-1	-	55237544	55237619	64	bta-miR-1	16		Somatic Cell Score	2775
rs474487186	C	C	C/G	14	1566987	1566988	MI0011321	bta-mir-2308	+	1566933	1567001	56	bta-miR-2308	11		Somatic Cell Score	3517
rs441612274	T	T	G/T	14	1566994	1566995	MI0011321	bta-mir-2308	+	1566933	1567001	63	bta-miR-2308	18		Somatic Cell Score	3517
rs442560532	G	G	C/G	14	1883897	1883898	MI0010473	bta-mir-1839	-	1883846	1883917	20	bta-miR-1839	14		Somatic Cell Score	3517
rs437935043	G	G	G/T	14	2071861	2071862	MI0011322	bta-mir-2309	+	2071851	2071925	12	bta-miR-2309	0		Somatic Cell Score	3517
rs472054638	A	A	A/G	14	2071874	2071875	MI0011322	bta-mir-2309	+	2071851	2071925	25	bta-miR-2309	13		Somatic Cell Score	3517
rs442473323	G	G	C/G	14	2071877	2071878	MI0011322	bta-mir-2309	+	2071851	2071925	28	bta-miR-2309	16		Somatic Cell Score	3517
rs461418186	C	C	C/G	14	2071878	2071879	MI0011322	bta-mir-2309	+	2071851	2071925	29	bta-miR-2309	17		Somatic Cell Score	3517
rs483010422	A	A	A/G	14	2071879	2071880	MI0011322	bta-mir-2309	+	2071851	2071925	30	bta-miR-2309	18		Somatic Cell Score	3517
rs443944314	G	G	C/G	14	2071880	2071881	MI0011322	bta-mir-2309	+	2071851	2071925	31	bta-miR-2309	19		Somatic Cell Score	3517
rs516857374	A	A	A/G	14	2272027	2272028	MI0013051	bta-mir-193a-2	-	2272017	2272069	42	bta-miR-193a	10		Somatic Cell Score	3517
rs463025619	T	T	A/C/T	14	4030376	4030377	MI0004738	bta-mir-151	+	4030319	4030387	59	bta-miR-151-3p	14		Somatic Cell Score	3517
rs471581713	G	G	C/G	14	4030378	4030379	MI0004738	bta-mir-151	+	4030319	4030387	61	bta-miR-151-3p	16		Somatic Cell Score	3517
rs438590414	A	A	A/G	14	4030379	4030380	MI0004738	bta-mir-151	+	4030319	4030387	62	bta-miR-151-3p	17		Somatic Cell Score	3517
rs460416819	G	G	G/T	14	4030380	4030381	MI0004738	bta-mir-151	+	4030319	4030387	63	bta-miR-151-3p	18		Somatic Cell Score	3517
rs450214180	C	C	C/G	14	8080336	8080337	MI0004747	bta-mir-30d	+	8080292	8080361	46				Somatic Cell Score	2734
rs461847045	A	A	A/G	14	8084730	8084731	MI0004761	bta-mir-30b	+	8084721	8084808	11				Somatic Cell Score	2734
rs481840407	G	G	C/G	14	8084731	8084732	MI0004761	bta-mir-30b	+	8084721	8084808	12				Somatic Cell Score	2734
rs454135191	C	C	A/C	15	22134752	22134753	MI0004763	bta-mir-34b	+	22134725	22134808	29	bta-miR-34b	14		Somatic Cell Score	3416
rs472849520	T	T	A/T	15	22134753	22134754	MI0004763	bta-mir-34b	+	22134725	22134808	30	bta-miR-34b	15		Somatic Cell Score	3416
rs439745989	G	G	A/G	15	22134754	22134755	MI0004763	bta-mir-34b	+	22134725	22134808	31	bta-miR-34b	16		Somatic Cell Score	3416
rs452048521	A	A	A/G	15	22134755	22134756	MI0004763	bta-mir-34b	+	22134725	22134808	32	bta-miR-34b	17		Somatic Cell Score	3416
rs516011186	G	G	A/G	17	46313731	46313732	MI0025187	bta-mir-2285af-2	+	46313731	46313819	2				Somatic Cell Score	19037
rs723308798	T	T	C/T	17	46313734	46313735	MI0025187	bta-mir-2285af-2	+	46313731	46313819	5				Somatic Cell Score	19037
rs464530130	C	C	A/C	17	46313817	46313818	MI0025187	bta-mir-2285af-2	+	46313731	46313819	88				Somatic Cell Score	19037
rs448541193	T	T	C/T	18	8166109	8166110	MI0013056	bta-mir-2883	+	8166056	8166120	55	bta-miR-2883	11		Somatic Cell Score	3554
rs522231144	A	A	A/G	18	14003620	14003621	MI0011352	bta-mir-2327	+	14003563	14003632	59	bta-miR-2327	14		Somatic Cell Score	3554
rs452176772	C	C	A/C	18	14003622	14003623	MI0011352	bta-mir-2327	+	14003563	14003632	61	bta-miR-2327	16		Somatic Cell Score	3554
rs480706266	T	T	A/T	18	24992715	24992716	MI0005029	bta-mir-138-2	+	24992697	24992779	20	bta-miR-138	10		Somatic Cell Score	18469
rs447699699	G	G	A/G	18	24992723	24992724	MI0005029	bta-mir-138-2	+	24992697	24992779	28	bta-miR-138	18		Somatic Cell Score	18469
rs466354909	A	A	A/T	18	24992727	24992728	MI0005029	bta-mir-138-2	+	24992697	24992779	32	bta-miR-138	22		Somatic Cell Score	18469
rs451611728	A	A	A/G	18	34957623	34957624	MI0009800	bta-mir-328	-	34957610	34957701	78	bta-miR-328	18		Somatic Cell Score	9904
rs465152007	G	G	A/G	18	34957630	34957631	MI0009800	bta-mir-328	-	34957610	34957701	71	bta-miR-328	11		Somatic Cell Score	9904
rs454130001	T	T	A/G/T	18	37088201	37088202	MI0005010	bta-mir-140	+	37088137	37088230	66	bta-miR-140	9		Somatic Cell Score	9904
rs471045812	A	A	A/G	18	37088212	37088213	MI0005010	bta-mir-140	+	37088137	37088230	77	bta-miR-140	20		Somatic Cell Score	9904
rs717113406	C	C	A/C	18	39351766	39351767	MI0011353	bta-mir-2328	+	39351757	39351834	11	bta-miR-2328-5p	0		Somatic Cell Score	9904
rs464549623	C	C	C/G	18	39351782	39351783	MI0011353	bta-mir-2328	+	39351757	39351834	27	bta-miR-2328-5p	16		Somatic Cell Score	9904
rs433109539	G	G	G/T	18	39351784	39351785	MI0011353	bta-mir-2328	+	39351757	39351834	29	bta-miR-2328-5p	18		Somatic Cell Score	9904
rs435905103	T	T	G/T	18	39351807	39351808	MI0011353	bta-mir-2328	+	39351757	39351834	52	bta-miR-2328-3p	0		Somatic Cell Score	9904
rs440866354	G	G	C/G	18	39351816	39351817	MI0011353	bta-mir-2328	+	39351757	39351834	61	bta-miR-2328-3p	9		Somatic Cell Score	9904
rs516514139	-	-	-/G	18	39351819	39351819	MI0011353	bta-mir-2328	+	39351757	39351834	63	bta-miR-2328-3p	12		Somatic Cell Score	9904
rs451334699	G	G	A/G	18	39351819	39351820	MI0011353	bta-mir-2328	+	39351757	39351834	64	bta-miR-2328-3p	12		Somatic Cell Score	9904
rs471317529	G	G	G/T	18	39351822	39351823	MI0011353	bta-mir-2328	+	39351757	39351834	67	bta-miR-2328-3p	15		Somatic Cell Score	9904
rs443135345	C	C	C/G	18	39351824	39351825	MI0011353	bta-mir-2328	+	39351757	39351834	69	bta-miR-2328-3p	17		Somatic Cell Score	9904
rs469658778	C	C	C/G	18	40433086	40433087	MI0013076	bta-mir-2901	+	40433025	40433107	63	bta-miR-2901	0		Somatic Cell Score	9904
rs454219260	C	C	A/C	18	40433095	40433096	MI0013076	bta-mir-2901	+	40433025	40433107	72	bta-miR-2901	9		Somatic Cell Score	9904
rs464167184	C	C	C/G	18	40433098	40433099	MI0013076	bta-mir-2901	+	40433025	40433107	75	bta-miR-2901	12		Somatic Cell Score	9904
rs432928056	G	G	C/G	18	40433101	40433102	MI0013076	bta-mir-2901	+	40433025	40433107	78	bta-miR-2901	15		Somatic Cell Score	9904
rs456211709	C	C	C/T	18	40433104	40433105	MI0013076	bta-mir-2901	+	40433025	40433107	81	bta-miR-2901	18		Somatic Cell Score	9904
rs476306798	T	T	G/T	18	40433105	40433106	MI0013076	bta-mir-2901	+	40433025	40433107	82	bta-miR-2901	19		Somatic Cell Score	9904
rs526838813	-	-	-/CC	18	40433106	40433106	MI0013076	bta-mir-2901	+	40433025	40433107	82	bta-miR-2901	20		Somatic Cell Score	9904
rs447689244	C	C	A/C	18	54224758	54224759	MI0013072	bta-mir-2897	+	54224747	54224815	13	bta-miR-2897	11		Somatic Cell Score	3622
rs461286955	C	C	C/G	18	54224759	54224760	MI0013072	bta-mir-2897	+	54224747	54224815	14	bta-miR-2897	12		Somatic Cell Score	3622
rs481340462	A	A	A/C/T	18	54224760	54224761	MI0013072	bta-mir-2897	+	54224747	54224815	15	bta-miR-2897	13		Somatic Cell Score	3622
rs444486035	G	G	G/T	18	56285108	56285109	MI0011356	bta-mir-2330	-	56285098	56285175	67	bta-miR-2330-3p	16		Somatic Cell Score	3622
rs463536909	C	C	C/G	18	56285109	56285110	MI0011356	bta-mir-2330	-	56285098	56285175	66	bta-miR-2330-3p	15		Somatic Cell Score	3622
rs482043953	C	C	C/G	18	56285110	56285111	MI0011356	bta-mir-2330	-	56285098	56285175	65	bta-miR-2330-3p	14		Somatic Cell Score	3622
rs449231361	G	G	G/T	18	56285112	56285113	MI0011356	bta-mir-2330	-	56285098	56285175	63	bta-miR-2330-3p	12		Somatic Cell Score	3622
rs461230464	G	G	G/T	18	56285114	56285115	MI0011356	bta-mir-2330	-	56285098	56285175	61	bta-miR-2330-3p	10		Somatic Cell Score	3622
rs450529020	A	A	A/G	18	56285144	56285145	MI0011356	bta-mir-2330	-	56285098	56285175	31	bta-miR-2330-5p	21		Somatic Cell Score	3622
rs469579325	G	G	G/T	18	56285145	56285146	MI0011356	bta-mir-2330	-	56285098	56285175	30	bta-miR-2330-5p	20		Somatic Cell Score	3622
rs436567816	C	C	C/T	18	56285150	56285151	MI0011356	bta-mir-2330	-	56285098	56285175	25	bta-miR-2330-5p	15		Somatic Cell Score	3622
rs455106241	A	A	A/C/T	18	56285151	56285152	MI0011356	bta-mir-2330	-	56285098	56285175	24	bta-miR-2330-5p	14		Somatic Cell Score	3622
rs480713568	A	A	A/G	19	10339885	10339886	MI0009840	bta-mir-454	-	10339845	10339958	73	bta-miR-454	11		Somatic Cell Score	3623
rs452475056	T	T	G/T	19	10349516	10349517	MI0009789	bta-mir-301a	-	10349506	10349590	74	bta-miR-301a	24		Somatic Cell Score	3623
rs472780316	C	C	C/T	19	10349529	10349530	MI0009789	bta-mir-301a	-	10349506	10349590	61	bta-miR-301a	11		Somatic Cell Score	3623
rs433017367	G	G	G/T	19	15308152	15308153	MI0011357	bta-mir-2331	+	15308148	15308218	6	bta-miR-2331-5p	0		Somatic Cell Score	3623
rs466849664	C	C	C/G	19	15308162	15308163	MI0011357	bta-mir-2331	+	15308148	15308218	16	bta-miR-2331-5p	10		Somatic Cell Score	3623
rs434737036	T	T	G/T	19	15308163	15308164	MI0011357	bta-mir-2331	+	15308148	15308218	17	bta-miR-2331-5p	11		Somatic Cell Score	3623
rs454930129	G	G	G/T	19	15308164	15308165	MI0011357	bta-mir-2331	+	15308148	15308218	18	bta-miR-2331-5p	12		Somatic Cell Score	3623
rs475052359	G	G	A/G	19	15308167	15308168	MI0011357	bta-mir-2331	+	15308148	15308218	21	bta-miR-2331-5p	15		Somatic Cell Score	3623
rs457405900	A	A	A/C	19	15308214	15308215	MI0011357	bta-mir-2331	+	15308148	15308218	68	bta-miR-2331-3p	19		Somatic Cell Score	3623
rs453141253	T	T	G/T	19	18582013	18582014	MI0011358	bta-mir-2332	+	18581961	18582029	54	bta-miR-2332	9		Somatic Cell Score	10446
rs473264547	C	C	C/T	19	18582014	18582015	MI0011358	bta-mir-2332	+	18581961	18582029	55	bta-miR-2332	10		Somatic Cell Score	10446
rs441932753	G	G	G/T	19	18582017	18582018	MI0011358	bta-mir-2332	+	18581961	18582029	58	bta-miR-2332	13		Somatic Cell Score	10446
rs461695404	A	A	A/G	19	18582019	18582020	MI0011358	bta-mir-2332	+	18581961	18582029	60	bta-miR-2332	15		Somatic Cell Score	10446
rs481907854	C	C	A/C/G	19	18582022	18582023	MI0011358	bta-mir-2332	+	18581961	18582029	63	bta-miR-2332	18		Somatic Cell Score	10446
rs444090337	A	A	A/T	19	18582024	18582025	MI0011358	bta-mir-2332	+	18581961	18582029	65	bta-miR-2332	20		Somatic Cell Score	10446
rs457631317	A	A	A/C	19	18582025	18582026	MI0011358	bta-mir-2332	+	18581961	18582029	66	bta-miR-2332	21		Somatic Cell Score	10446
rs477717795	G	G	A/G	19	18582026	18582027	MI0011358	bta-mir-2332	+	18581961	18582029	67	bta-miR-2332	22		Somatic Cell Score	10446
rs446171136	T	T	G/T	19	18582027	18582028	MI0011358	bta-mir-2332	+	18581961	18582029	68	bta-miR-2332	23		Somatic Cell Score	10446
rs471621351	T	T	C/T	19	18811292	18811293	MI0009812	bta-mir-365-2	-	18811262	18811372	80	bta-miR-365-3p	13		Somatic Cell Score	10446
rs440154410	A	A	A/C	19	18811295	18811296	MI0009812	bta-mir-365-2	-	18811262	18811372	77	bta-miR-365-3p	10		Somatic Cell Score	10446
rs466995186	C	C	A/C/G	19	18813599	18813600	MI0011359	bta-mir-2333	-	18813556	18813618	19	bta-miR-2333	16		Somatic Cell Score	10446
rs472034576	G	G	G/T	19	18824236	18824237	MI0005014	bta-mir-193a	-	18824221	18824301	65	bta-miR-193a-3p	17		Somatic Cell Score	10446
rs440546462	T	T	C/T	19	18824239	18824240	MI0005014	bta-mir-193a	-	18824221	18824301	62	bta-miR-193a-3p	14		Somatic Cell Score	10446
rs456764338	G	G	C/G	19	20796904	20796905	MI0009837	bta-mir-451	-	20796860	20796930	26	bta-miR-451	11		Somatic Cell Score	10446
rs474592494	A	A	A/C	19	21799509	21799510	MI0005046	bta-mir-423	+	21799484	21799577	27	bta-miR-423-5p	9		Somatic Cell Score	10446
rs441675174	A	A	A/C	19	21799555	21799556	MI0005046	bta-mir-423	+	21799484	21799577	73	bta-miR-423-3p	20		Somatic Cell Score	10446
rs462648999	T	T	A/T	19	22824693	22824694	MI0011362	bta-mir-2336	+	22824635	22824710	60	bta-miR-2336	12		Somatic Cell Score	10446
rs470938322	G	G	A/G	19	23382460	23382461	MI0015943	bta-mir-3600	+	23382437	23382517	25	bta-miR-3600	14		Somatic Cell Score	10446
rs444113221	A	A	A/G	19	23651162	23651163	MI0005028	bta-mir-132	-	23651140	23651240	78	bta-miR-132	20		Somatic Cell Score	10446
rs445200981	T	T	G/T	19	23651628	23651629	MI0009776	bta-mir-212	-	23651570	23651680	52	bta-miR-212	21		Somatic Cell Score	10446
rs470186567	C	C	C/G	19	23651632	23651633	MI0009776	bta-mir-212	-	23651570	23651680	48	bta-miR-212	17		Somatic Cell Score	10446
rs437248153	T	T	G/T	19	23651635	23651636	MI0009776	bta-mir-212	-	23651570	23651680	45	bta-miR-212	14		Somatic Cell Score	10446
rs455676155	C	C	C/T	19	23651636	23651637	MI0009776	bta-mir-212	-	23651570	23651680	44	bta-miR-212	13		Somatic Cell Score	10446
rs467752384	T	T	C/T	19	23651637	23651638	MI0009776	bta-mir-212	-	23651570	23651680	43	bta-miR-212	12		Somatic Cell Score	10446
rs434941973	G	G	A/C/G	19	23651639	23651640	MI0009776	bta-mir-212	-	23651570	23651680	41	bta-miR-212	10		Somatic Cell Score	10446
rs472397807	C	C	C/G	19	27441395	27441396	MI0005459	bta-mir-195	-	27441343	27441429	34	bta-miR-195	20		Somatic Cell Score	10446
rs441317402	A	A	A/C	19	27441397	27441398	MI0005459	bta-mir-195	-	27441343	27441429	32	bta-miR-195	18		Somatic Cell Score	10446
rs525199024	-	-	-/T	19	27441401	27441401	MI0005459	bta-mir-195	-	27441343	27441429	28	bta-miR-195	14		Somatic Cell Score	10446
rs458221602	T	T	G/T	19	27441401	27441402	MI0005459	bta-mir-195	-	27441343	27441429	28	bta-miR-195	14		Somatic Cell Score	10446
rs435499392	A	A	A/C	19	27441719	27441720	MI0005467	bta-mir-497	-	27441652	27441763	44	bta-miR-497	21		Somatic Cell Score	10446
rs455473824	A	A	A/C	19	27441721	27441722	MI0005467	bta-mir-497	-	27441652	27441763	42	bta-miR-497	19		Somatic Cell Score	10446
rs472434927	A	A	A/G	19	27441723	27441724	MI0005467	bta-mir-497	-	27441652	27441763	40	bta-miR-497	17		Somatic Cell Score	10446
rs450529902	A	A	A/C	19	27571391	27571392	MI0009798	bta-mir-324	-	27571341	27571429	38	bta-miR-324	21		Somatic Cell Score	10446
rs467315154	A	A	A/G	19	27571402	27571403	MI0009798	bta-mir-324	-	27571341	27571429	27	bta-miR-324	10		Somatic Cell Score	10446
rs451217199	G	G	A/G	19	31333524	31333525	MI0009891	bta-mir-744	+	31333512	31333611	14	bta-miR-744	0		Somatic Cell Score	10446
rs468038561	G	G	A/G	19	31333533	31333534	MI0009891	bta-mir-744	+	31333512	31333611	23	bta-miR-744	9		Somatic Cell Score	10446
rs436600929	G	G	G/T	19	31333534	31333535	MI0009891	bta-mir-744	+	31333512	31333611	24	bta-miR-744	10		Somatic Cell Score	10446
rs453473484	C	C	C/G	19	31333540	31333541	MI0009891	bta-mir-744	+	31333512	31333611	30	bta-miR-744	16		Somatic Cell Score	10446
rs473608308	G	G	C/G	19	31333542	31333543	MI0009891	bta-mir-744	+	31333512	31333611	32	bta-miR-744	18		Somatic Cell Score	10446
rs456585013	G	G	C/G	19	31973548	31973549	MI0011366	bta-mir-2339	-	31973541	31973612	64	bta-miR-2339	19		Somatic Cell Score	10446
rs476646582	T	T	G/T	19	31973552	31973553	MI0011366	bta-mir-2339	-	31973541	31973612	60	bta-miR-2339	15		Somatic Cell Score	10446
rs451098688	T	T	G/T	19	35249067	35249068	MI0009808	bta-mir-33b	+	35249052	35249145	17	bta-miR-33b	0		Somatic Cell Score	10446
rs478171905	A	A	A/G	19	35249086	35249087	MI0009808	bta-mir-33b	+	35249052	35249145	36	bta-miR-33b	19		Somatic Cell Score	10446
rs385493425	G	G	-/G	19	38542897	38542898	MI0013059	bta-mir-2886	+	38542846	38542920	53	bta-miR-2886	12		Somatic Cell Score	10446
rs448369554	G	G	C/G	19	38542897	38542898	MI0013059	bta-mir-2886	+	38542846	38542920	53	bta-miR-2886	12		Somatic Cell Score	10446
rs480454859	C	C	C/T	19	39081217	39081218	MI0015944	bta-mir-2957	-	39081172	39081242	25	bta-miR-2957	20		Somatic Cell Score	10446
rs480454859	C	C	C/T	19	39081217	39081218	MI0009748	bta-mir-152	+	39081165	39081250	54	bta-miR-152	0		Somatic Cell Score	10446
rs450745650	A	A	A/C	19	39081230	39081231	MI0009748	bta-mir-152	+	39081165	39081250	67	bta-miR-152	13		Somatic Cell Score	10446
rs469287676	T	T	C/T	19	39081233	39081234	MI0009748	bta-mir-152	+	39081165	39081250	70	bta-miR-152	16		Somatic Cell Score	10446
rs477805418	T	T	C/T	19	39081234	39081235	MI0009748	bta-mir-152	+	39081165	39081250	71	bta-miR-152	17		Somatic Cell Score	10446
rs444814245	G	G	A/C/G	19	39081236	39081237	MI0009748	bta-mir-152	+	39081165	39081250	73	bta-miR-152	19		Somatic Cell Score	10446
rs466456349	G	G	G/T	19	39081237	39081238	MI0015944	bta-mir-2957	-	39081172	39081242	5	bta-miR-2957	0		Somatic Cell Score	10446
rs466456349	G	G	G/T	19	39081237	39081238	MI0009748	bta-mir-152	+	39081165	39081250	74	bta-miR-152	20		Somatic Cell Score	10446
rs445093098	G	G	C/G	19	40516473	40516474	MI0011370	bta-mir-2342	+	40516423	40516496	52	bta-miR-2342	9		Somatic Cell Score	10446
rs465244690	T	T	C/T	19	40516483	40516484	MI0011370	bta-mir-2342	+	40516423	40516496	62	bta-miR-2342	19		Somatic Cell Score	10446
rs461960328	T	T	A/G/T	19	40683973	40683974	MI0021119	bta-mir-4286-1	-	40683920	40683995	22	bta-miR-4286	15		Somatic Cell Score	10446
rs475666025	C	C	A/C	19	40683975	40683976	MI0021119	bta-mir-4286-1	-	40683920	40683995	20	bta-miR-4286	13		Somatic Cell Score	10446
rs453479312	T	T	G/T	19	50423911	50423912	MI0011372	bta-mir-2344	-	50423906	50423966	55	bta-miR-2344	21		Somatic Cell Score	19038
rs471932289	G	G	C/G	19	50423919	50423920	MI0011372	bta-mir-2344	-	50423906	50423966	47	bta-miR-2344	13		Somatic Cell Score	19038
rs717669024	C	C	C/T	19	50423921	50423922	MI0011372	bta-mir-2344	-	50423906	50423966	45	bta-miR-2344	11		Somatic Cell Score	19038
rs799139875	T	T	G/T	19	50853989	50853990	MI0011373	bta-mir-2345	-	50853965	50854027	38	bta-miR-2345	0		Somatic Cell Score	19038
rs481083912	C	C	A/C	19	50968752	50968753	MI0011373_4	bta-mir-2345	+	50968696	50968758	58	bta-miR-2345	18		Somatic Cell Score	19038
rs448202937	C	C	C/G	19	50968753	50968754	MI0011373_4	bta-mir-2345	+	50968696	50968758	59	bta-miR-2345	19		Somatic Cell Score	19038
rs451938485	C	C	A/C/G	19	51593983	51593984	MI0011375	bta-mir-2347	+	51593973	51594031	12	bta-miR-2347	9		Somatic Cell Score	19038
rs476836123	A	A	A/C	19	51593984	51593985	MI0011375	bta-mir-2347	+	51593973	51594031	13	bta-miR-2347	10		Somatic Cell Score	19038
rs443787482	C	C	C/G	19	51593988	51593989	MI0011375	bta-mir-2347	+	51593973	51594031	17	bta-miR-2347	14		Somatic Cell Score	19038
rs455761995	G	G	A/G	19	51593990	51593991	MI0011375	bta-mir-2347	+	51593973	51594031	19	bta-miR-2347	16		Somatic Cell Score	19038
rs473733790	C	C	C/G	19	51593993	51593994	MI0011375	bta-mir-2347	+	51593973	51594031	22	bta-miR-2347	19		Somatic Cell Score	19038
rs478792039	A	A	A/T	19	52189695	52189696	MI0009805	bta-mir-338	+	52189629	52189720	68	bta-miR-338	12		Somatic Cell Score	19038
rs445736249	G	G	A/G	19	52189700	52189701	MI0009805	bta-mir-338	+	52189629	52189720	73	bta-miR-338	17		Somatic Cell Score	19038
rs464178583	T	T	G/T	19	52189702	52189703	MI0009805	bta-mir-338	+	52189629	52189720	75	bta-miR-338	19		Somatic Cell Score	19038
rs432584034	A	A	A/C	19	52189705	52189706	MI0009805	bta-mir-338	+	52189629	52189720	78	bta-miR-338	22		Somatic Cell Score	19038
rs437668982	G	G	C/G	19	54657757	54657758	MI0011376	bta-mir-2348	+	54657733	54657811	26	bta-miR-2348	11		Somatic Cell Score	10446
rs454958900	A	A	A/C	19	54657759	54657760	MI0011376	bta-mir-2348	+	54657733	54657811	28	bta-miR-2348	13		Somatic Cell Score	10446
rs475263982	G	G	G/T	19	54657760	54657761	MI0011376	bta-mir-2348	+	54657733	54657811	29	bta-miR-2348	14		Somatic Cell Score	10446
rs440687118	G	G	A/G	19	54657763	54657764	MI0011376	bta-mir-2348	+	54657733	54657811	32	bta-miR-2348	17		Somatic Cell Score	10446
rs721833062	G	G	C/G	20	10187794	10187795	MI0025528	bta-mir-7858	-	10187790	10187848	54	bta-miR-7858	18		Somatic Cell Score	2683
rs458957967	A	A	A/G	21	21157513	21157514	MI0011394	bta-mir-2363-2	-	21157505	21157576	63	bta-miR-2363	18		Somatic Cell Score	5446
rs467511526	C	C	A/C	21	21157516	21157517	MI0011394	bta-mir-2363-2	-	21157505	21157576	60	bta-miR-2363	15		Somatic Cell Score	5446
rs800675168	C	C	C/T	21	21157517	21157518	MI0011394	bta-mir-2363-2	-	21157505	21157576	59	bta-miR-2363	14		Somatic Cell Score	5446
rs798895576	AC	AC	-/AC	21	21157521	21157523	MI0011394	bta-mir-2363-2	-	21157505	21157576	55	bta-miR-2363	10		Somatic Cell Score	5446
rs461291765	A	A	A/C	21	21157531	21157532	MI0011394	bta-mir-2363-2	-	21157505	21157576	45	bta-miR-2363	0		Somatic Cell Score	5446
rs439626767	T	T	C/T	21	21250131	21250132	MI0009912	bta-mir-9-1	+	21250101	21250190	32	bta-miR-9-5p	15		Somatic Cell Score	5446
rs462802394	A	A	A/C	21	21250134	21250135	MI0009912	bta-mir-9-1	+	21250101	21250190	35	bta-miR-9-5p	18		Somatic Cell Score	5446
rs478900129	T	T	G/T	21	21250165	21250166	MI0009912	bta-mir-9-1	+	21250101	21250190	66	bta-miR-9-3p	10		Somatic Cell Score	5446
rs447461149	C	C	A/C/G	21	21250169	21250170	MI0009912	bta-mir-9-1	+	21250101	21250190	70	bta-miR-9-3p	14		Somatic Cell Score	5446
rs457897667	G	G	G/T	21	21250170	21250171	MI0009912	bta-mir-9-1	+	21250101	21250190	71	bta-miR-9-3p	15		Somatic Cell Score	5446
rs477920698	A	A	A/C	21	21250171	21250172	MI0009912	bta-mir-9-1	+	21250101	21250190	72	bta-miR-9-3p	16		Somatic Cell Score	5446
rs458845300	T	T	C/T	21	22859935	22859936	MI0011395	bta-mir-2364	+	22859905	22859978	32	bta-miR-2364	22		Somatic Cell Score	5446
rs457099000	G	G	G/T	21	28046478	28046479	MI0009775	bta-mir-211	-	28046409	28046518	40	bta-miR-211	15		Somatic Cell Score	5446
rs436491861	A	A	A/C	21	33857337	33857338	MI0009879	bta-mir-631	+	33857312	33857386	27	bta-miR-631	12		Somatic Cell Score	5446
rs456595634	C	C	A/C	21	33857338	33857339	MI0009879	bta-mir-631	+	33857312	33857386	28	bta-miR-631	13		Somatic Cell Score	5446
rs476625648	C	C	C/G	21	33857339	33857340	MI0009879	bta-mir-631	+	33857312	33857386	29	bta-miR-631	14		Somatic Cell Score	5446
rs438852833	C	C	A/C	21	33857341	33857342	MI0009879	bta-mir-631	+	33857312	33857386	31	bta-miR-631	16		Somatic Cell Score	5446
rs437008491	G	G	A/G	23	24308104	24308105	MI0009772	bta-mir-206	+	24308042	24308127	64	bta-miR-206	10		Somatic Cell Score	2688
rs450125344	T	T	G/T	23	28203225	28203226	MI0009903	bta-mir-877	-	28203151	28203252	27	bta-miR-877	17		Somatic Cell Score	4989
rs520750012	-	-	-/G	23	28203226	28203226	MI0009903	bta-mir-877	-	28203151	28203252	26	bta-miR-877	16		Somatic Cell Score	4989
rs714132458	C	C	C/T	23	28203227	28203228	MI0009903	bta-mir-877	-	28203151	28203252	25	bta-miR-877	15		Somatic Cell Score	4989
rs465508980	G	G	C/G/T	23	28203228	28203229	MI0009903	bta-mir-877	-	28203151	28203252	24	bta-miR-877	14		Somatic Cell Score	4989
rs432526839	C	C	C/T	23	28203230	28203231	MI0009903	bta-mir-877	-	28203151	28203252	22	bta-miR-877	12		Somatic Cell Score	4989
rs454268600	A	A	A/C/T	23	28203231	28203232	MI0009903	bta-mir-877	-	28203151	28203252	21	bta-miR-877	11		Somatic Cell Score	4989
rs472892660	T	T	A/C/T	23	28203232	28203233	MI0009903	bta-mir-877	-	28203151	28203252	20	bta-miR-877	10		Somatic Cell Score	4989
rs460449726	C	C	C/T	23	30788173	30788174	MI0011414	bta-mir-2379	-	30788153	30788230	57	bta-miR-2379	10		Somatic Cell Score	4989
rs434683718	A	A	A/C	23	31589218	31589219	MI0022331	bta-mir-6531	-	31589157	31589240	22	bta-miR-6531	12		Somatic Cell Score	2688
rs453143868	A	A	A/G	23	31589220	31589221	MI0022331	bta-mir-6531	-	31589157	31589240	20	bta-miR-6531	10		Somatic Cell Score	2688
rs480399693	C	C	C/T	25	35300137	35300138	MI0011428	bta-mir-2388	-	35300128	35300206	69	bta-miR-2388-3p	20		Somatic Cell Score	10347
rs441069804	A	A	A/G	25	35300138	35300139	MI0011428	bta-mir-2388	-	35300128	35300206	68	bta-miR-2388-3p	19		Somatic Cell Score	10347
rs459373475	C	C	C/G	25	35300140	35300141	MI0011428	bta-mir-2388	-	35300128	35300206	66	bta-miR-2388-3p	17		Somatic Cell Score	10347
rs477983272	C	C	A/C	25	35300143	35300144	MI0011428	bta-mir-2388	-	35300128	35300206	63	bta-miR-2388-3p	14		Somatic Cell Score	10347
rs444750627	T	T	A/T	25	35300148	35300149	MI0011428	bta-mir-2388	-	35300128	35300206	58	bta-miR-2388-3p	9		Somatic Cell Score	10347
rs516193130	A	A	A/C	25	35300184	35300185	MI0011428	bta-mir-2388	-	35300128	35300206	22	bta-miR-2388-5p	11		Somatic Cell Score	10347
rs475450683	C	C	C/T	26	11288008	11288009	MI0005006	bta-mir-107	-	11287994	11288074	66	bta-miR-107	17		Somatic Cell Score	2689
rs439199024	T	T	G/T	26	11288011	11288012	MI0005006	bta-mir-107	-	11287994	11288074	63	bta-miR-107	14		Somatic Cell Score	2689
rs474316920	C	C	C/T	26	29429657	29429658	MI0022332	bta-mir-2285k-4	+	29429648	29429720	11				Somatic Cell Score	2736
rs379019464	A	A	A/T	26	29429669	29429670	MI0022332	bta-mir-2285k-4	+	29429648	29429720	23				Somatic Cell Score	2736
rs448112257	G	G	G/T	26	29429687	29429688	MI0022332	bta-mir-2285k-4	+	29429648	29429720	41				Somatic Cell Score	2736
rs452654117	G	G	C/G	29	37319017	37319018	MI0009873	bta-mir-584-7	+	37319000	37319066	19	bta-miR-584	0		Somatic Cell Score	2695
rs522835790	-	-	-/GT	4	10653588	10653588	MI0009880	bta-mir-653	-	10653527	10653616	28	bta-miR-653	17		Somatic Cell Score	2730
rs210132888	A	A	A/G	4	10653588	10653589	MI0009880	bta-mir-653	-	10653527	10653616	28	bta-miR-653	17		Somatic Cell Score	2730
rs449167194	G	G	A/G	4	10653589	10653590	MI0009880	bta-mir-653	-	10653527	10653616	27	bta-miR-653	16		Somatic Cell Score	2730
rs468322037	G	G	A/G	4	10653591	10653592	MI0009880	bta-mir-653	-	10653527	10653616	25	bta-miR-653	14		Somatic Cell Score	2730
rs435433062	G	G	G/T	4	10653595	10653596	MI0009880	bta-mir-653	-	10653527	10653616	21	bta-miR-653	10		Somatic Cell Score	2730
rs453890918	T	T	C/T	4	10653596	10653597	MI0009880	bta-mir-653	-	10653527	10653616	20	bta-miR-653	9		Somatic Cell Score	2730
rs521300256	T	T	C/T	5	25109091	25109092	MI0005463	bta-mir-331	+	25109057	25109146	36	bta-miR-331-5p	10		Somatic Cell Score	20620
rs454155021	C	C	C/G	5	26199849	26199850	MI0009766	bta-mir-196a-2	-	26199801	26199885	36	bta-miR-196a	21		Somatic Cell Score	20620
rs473190685	C	C	A/C	5	26199850	26199851	MI0009766	bta-mir-196a-2	-	26199801	26199885	35	bta-miR-196a	20		Somatic Cell Score	20620
rs433731117	A	A	A/T	5	26199851	26199852	MI0009766	bta-mir-196a-2	-	26199801	26199885	34	bta-miR-196a	19		Somatic Cell Score	20620
rs435740642	A	A	A/C	5	30251664	30251665	MI0011475	bta-mir-2425	+	30251637	30251717	29	bta-miR-2425-5p	14		Somatic Cell Score	2659
rs462036920	C	C	C/G	5	30251700	30251701	MI0011475	bta-mir-2425	+	30251637	30251717	65	bta-miR-2425-3p	13		Somatic Cell Score	2659
rs474133834	T	T	C/T	5	30251702	30251703	MI0011475	bta-mir-2425	+	30251637	30251717	67	bta-miR-2425-3p	15		Somatic Cell Score	2659
rs439108795	T	T	G/T	5	30952191	30952192	MI0011476	bta-mir-2426	+	30952153	30952226	40				Somatic Cell Score	10107
rs457697282	A	A	A/C	5	30952204	30952205	MI0011476	bta-mir-2426	+	30952153	30952226	53				Somatic Cell Score	10107
rs471376487	A	A	A/C	5	30952206	30952207	MI0011476	bta-mir-2426	+	30952153	30952226	55				Somatic Cell Score	10107
rs443273401	T	T	G/T	5	30952211	30952212	MI0011476	bta-mir-2426	+	30952153	30952226	60				Somatic Cell Score	10107
rs463447618	T	T	C/T	5	30952220	30952221	MI0011476	bta-mir-2426	+	30952153	30952226	69				Somatic Cell Score	10107
rs480390600	T	T	G/T	5	30952221	30952222	MI0011476	bta-mir-2426	+	30952153	30952226	70				Somatic Cell Score	10107
rs438273771	A	A	A/G	5	31283948	31283949	MI0010458	bta-mir-1291	+	31283919	31283992	31				Somatic Cell Score	2659
rs455256602	C	C	C/G	5	31283952	31283953	MI0010458	bta-mir-1291	+	31283919	31283992	35				Somatic Cell Score	2659
rs475288931	C	C	A/C	5	31283955	31283956	MI0010458	bta-mir-1291	+	31283919	31283992	38				Somatic Cell Score	2659
rs442457711	G	G	G/T	5	31283957	31283958	MI0010458	bta-mir-1291	+	31283919	31283992	40				Somatic Cell Score	2659
rs452822219	T	T	C/T	5	31283959	31283960	MI0010458	bta-mir-1291	+	31283919	31283992	42				Somatic Cell Score	2659
rs473103242	G	G	A/G	5	31283970	31283971	MI0010458	bta-mir-1291	+	31283919	31283992	53				Somatic Cell Score	2659
rs438471089	G	G	G/T	5	31283971	31283972	MI0010458	bta-mir-1291	+	31283919	31283992	54				Somatic Cell Score	2659
rs458753878	C	C	A/C	5	31283972	31283973	MI0010458	bta-mir-1291	+	31283919	31283992	55				Somatic Cell Score	2659
rs481982184	C	C	A/C	5	31283974	31283975	MI0010458	bta-mir-1291	+	31283919	31283992	57				Somatic Cell Score	2659
rs444230896	C	C	C/G	5	31283981	31283982	MI0010458	bta-mir-1291	+	31283919	31283992	64				Somatic Cell Score	2659
rs461297784	C	C	C/G	5	31283988	31283989	MI0010458	bta-mir-1291	+	31283919	31283992	71				Somatic Cell Score	2659
rs457205378	G	G	A/G	5	41964070	41964071	MI0011478	bta-mir-2428	+	41964062	41964126	10	bta-miR-2428	0		Somatic Cell Score	2659
rs474103601	T	T	G/T	5	41964089	41964090	MI0011478	bta-mir-2428	+	41964062	41964126	29	bta-miR-2428	19		Somatic Cell Score	2659
rs449913849	C	C	C/G	5	48164068	48164069	MI0009896	bta-mir-763	-	48164007	48164126	58	bta-miR-763	21		Somatic Cell Score	20620
rs523881739	-	-	-/A	5	48164069	48164069	MI0009896	bta-mir-763	-	48164007	48164126	57	bta-miR-763	20		Somatic Cell Score	20620
rs463555809	C	C	C/G	5	48164069	48164070	MI0009896	bta-mir-763	-	48164007	48164126	57	bta-miR-763	20		Somatic Cell Score	20620
rs480501603	A	A	A/C/G	5	48164070	48164071	MI0009896	bta-mir-763	-	48164007	48164126	56	bta-miR-763	19		Somatic Cell Score	20620
rs448880745	T	T	C/G/T	5	48164072	48164073	MI0009896	bta-mir-763	-	48164007	48164126	54	bta-miR-763	17		Somatic Cell Score	20620
rs515978086	-	-	-/TC	5	48164075	48164075	MI0009896	bta-mir-763	-	48164007	48164126	51	bta-miR-763	14		Somatic Cell Score	20620
rs465663072	T	T	G/T	5	48164075	48164076	MI0009896	bta-mir-763	-	48164007	48164126	51	bta-miR-763	14		Somatic Cell Score	20620
rs434468931	T	T	G/T	5	48164076	48164077	MI0009896	bta-mir-763	-	48164007	48164126	50	bta-miR-763	13		Somatic Cell Score	20620
rs444751174	C	C	C/T	5	48164077	48164078	MI0009896	bta-mir-763	-	48164007	48164126	49	bta-miR-763	12		Somatic Cell Score	20620
rs464932592	T	T	C/T	5	48164079	48164080	MI0009896	bta-mir-763	-	48164007	48164126	47	bta-miR-763	10		Somatic Cell Score	20620
rs441345866	T	T	G/T	5	48164089	48164090	MI0009896	bta-mir-763	-	48164007	48164126	37	bta-miR-763	0		Somatic Cell Score	20620
rs434076047	A	A	A/G	5	48952317	48952318	MI0011479	bta-mir-2429	-	48952298	48952372	55	bta-miR-2429	10		Somatic Cell Score	20620
rs446297956	A	A	A/G	5	51209138	51209139	MI0005065	bta-let-7i	-	51209081	51209164	26	bta-let-7i	21		Somatic Cell Score	20620
rs464823041	A	A	A/G	5	51209146	51209147	MI0005065	bta-let-7i	-	51209081	51209164	18	bta-let-7i	13		Somatic Cell Score	20620
rs431941760	A	A	A/C	5	51209147	51209148	MI0005065	bta-let-7i	-	51209081	51209164	17	bta-let-7i	12		Somatic Cell Score	20620
rs447350328	C	C	A/C	5	51209148	51209149	MI0005065	bta-let-7i	-	51209081	51209164	16	bta-let-7i	11		Somatic Cell Score	20620
rs465795553	T	T	A/T	5	51209149	51209150	MI0005065	bta-let-7i	-	51209081	51209164	15	bta-let-7i	10		Somatic Cell Score	20620
rs476396991	G	G	G/T	5	51209159	51209160	MI0005065	bta-let-7i	-	51209081	51209164	5	bta-let-7i	0		Somatic Cell Score	20620
rs433467712	A	A	A/C	5	56293219	56293220	MI0011480	bta-mir-2430	-	56293171	56293243	24	bta-miR-2430	17		Somatic Cell Score	20620
rs797625027	C	C	C/T	5	57121907	57121908	MI0011482	bta-mir-677	+	57121853	57121918	56				Somatic Cell Score	20620
rs449639507	T	T	G/T	5	57337569	57337570	MI0011483	bta-mir-2432	-	57337563	57337633	64	bta-miR-2432	19		Somatic Cell Score	20620
rs458465489	A	A	A/T	5	57337572	57337573	MI0011483	bta-mir-2432	-	57337563	57337633	61	bta-miR-2432	16		Somatic Cell Score	20620
rs460469400	G	G	A/G	5	57400262	57400263	MI0011484	bta-mir-2433	-	57400205	57400281	19	bta-miR-2433	9		Somatic Cell Score	20620
rs438267587	-	-	-/A	5	64962214	64962214	MI0011485	bta-mir-2434	-	64962168	64962241	27	bta-miR-2434	16		Somatic Cell Score	20620
rs432926009	C	C	A/C	5	64962221	64962222	MI0011485	bta-mir-2434	-	64962168	64962241	20	bta-miR-2434	9		Somatic Cell Score	20620
rs435890218	A	A	A/G	6	14162599	14162600	MI0009794	bta-mir-302c	+	14162579	14162646	22				Somatic Cell Score	10439
rs443007346	A	A	A/T	6	14162982	14162983	MI0009791	bta-mir-302a	+	14162972	14163041	12				Somatic Cell Score	10439
rs459875800	G	G	A/G	6	14162985	14162986	MI0009791	bta-mir-302a	+	14162972	14163041	15				Somatic Cell Score	10439
rs480215338	T	T	G/T	6	14162995	14162996	MI0009791	bta-mir-302a	+	14162972	14163041	25				Somatic Cell Score	10439
rs444790613	T	T	G/T	6	14162996	14162997	MI0009791	bta-mir-302a	+	14162972	14163041	26				Somatic Cell Score	10439
rs464930756	A	A	A/G	6	14163008	14163009	MI0009791	bta-mir-302a	+	14162972	14163041	38				Somatic Cell Score	10439
rs432282775	T	T	G/T	6	14163156	14163157	MI0009792	bta-mir-302d	+	14163149	14163218	9				Somatic Cell Score	10439
rs451652910	A	A	A/C	6	14163161	14163162	MI0009792	bta-mir-302d	+	14163149	14163218	14				Somatic Cell Score	10439
rs451366668	A	A	A/T	6	14163192	14163193	MI0009792	bta-mir-302d	+	14163149	14163218	45				Somatic Cell Score	10439
rs451936516	G	G	A/G	6	15440810	15440811	MI0011498	bta-mir-2444	-	15440766	15440840	30				Somatic Cell Score	10439
rs458669520	T	T	G/T	7	12915102	12915103	MI0005032	bta-mir-181c	+	12915072	12915168	32	bta-miR-181c	12		Somatic Cell Score	3537
rs526242226	-	-	-/T	7	12915110	12915110	MI0005032	bta-mir-181c	+	12915072	12915168	39	bta-miR-181c	20		Somatic Cell Score	3537
rs441790598	A	A	A/C/G	7	12915272	12915273	MI0009754	bta-mir-181d	+	12915238	12915350	36	bta-miR-181d	0		Somatic Cell Score	3537
rs478703839	T	T	G/T	7	12915282	12915283	MI0009754	bta-mir-181d	+	12915238	12915350	46	bta-miR-181d	10		Somatic Cell Score	3537
rs439341683	G	G	G/T	7	12915292	12915293	MI0009754	bta-mir-181d	+	12915238	12915350	56	bta-miR-181d	20		Somatic Cell Score	3537
rs448553645	G	G	G/T	7	12981664	12981665	MI0005053	bta-mir-24-2	-	12981642	12981713	49	bta-miR-24-3p	0		Somatic Cell Score	3537
rs442166180	A	A	A/G	7	12981798	12981799	MI0004746	bta-mir-27a	-	12981791	12981868	70	bta-miR-27a-3p	17		Somatic Cell Score	3537
rs460759488	C	C	A/C	7	12981800	12981801	MI0004746	bta-mir-27a	-	12981791	12981868	68	bta-miR-27a-3p	15		Somatic Cell Score	3537
rs479094921	C	C	C/G	7	12981805	12981806	MI0004746	bta-mir-27a	-	12981791	12981868	63	bta-miR-27a-3p	10		Somatic Cell Score	3537
rs458108331	C	C	A/C	7	12981815	12981816	MI0004746	bta-mir-27a	-	12981791	12981868	53	bta-miR-27a-3p	0		Somatic Cell Score	3537
rs451342205	C	C	A/C	7	12981839	12981840	MI0004746	bta-mir-27a	-	12981791	12981868	29	bta-miR-27a-5p	16		Somatic Cell Score	3537
rs449721776	G	G	G/T	7	15917828	15917829	MI0011511	bta-mir-2454	-	15917819	15917890	62	bta-miR-2454-3p	18		Somatic Cell Score	3537
rs463443180	G	G	G/T	7	15917832	15917833	MI0011511	bta-mir-2454	-	15917819	15917890	58	bta-miR-2454-3p	14		Somatic Cell Score	3537
rs480910227	G	G	A/G	7	15917835	15917836	MI0011511	bta-mir-2454	-	15917819	15917890	55	bta-miR-2454-3p	11		Somatic Cell Score	3537
rs445526538	G	G	C/G	7	15917870	15917871	MI0011511	bta-mir-2454	-	15917819	15917890	20	bta-miR-2454-5p	12		Somatic Cell Score	3537
rs460558928	C	C	C/G	7	16508931	16508932	MI0009770	bta-mir-199a-2	-	16508926	16508996	65	bta-miR-199a-3p	19		Somatic Cell Score	3537
rs477423465	T	T	G/T	7	16508935	16508936	MI0009770	bta-mir-199a-2	-	16508926	16508996	61	bta-miR-199a-3p	15		Somatic Cell Score	3537
rs439820718	G	G	G/T	7	16508936	16508937	MI0009770	bta-mir-199a-2	-	16508926	16508996	60	bta-miR-199a-3p	14		Somatic Cell Score	3537
rs463088231	A	A	A/C	7	16508942	16508943	MI0015950	bta-mir-3604-1	+	16508922	16508999	22	bta-miR-3604	13		Somatic Cell Score	3537
rs483351105	T	T	G/T	7	16508949	16508950	MI0015950	bta-mir-3604-1	+	16508922	16508999	29	bta-miR-3604	20		Somatic Cell Score	3537
rs448053211	A	A	A/T	7	16508950	16508951	MI0009770	bta-mir-199a-2	-	16508926	16508996	46	bta-miR-199a-3p	0		Somatic Cell Score	3537
rs448053211	A	A	A/T	7	16508950	16508951	MI0015950	bta-mir-3604-1	+	16508922	16508999	30	bta-miR-3604	21		Somatic Cell Score	3537
rs435521790	A	A	A/C	7	16508970	16508971	MI0009770	bta-mir-199a-2	-	16508926	16508996	26	bta-miR-199a-5p	21		Somatic Cell Score	3537
rs454902989	C	C	C/G	7	16508971	16508972	MI0009770	bta-mir-199a-2	-	16508926	16508996	25	bta-miR-199a-5p	20		Somatic Cell Score	3537
rs475037933	G	G	G/T	7	16508973	16508974	MI0009770	bta-mir-199a-2	-	16508926	16508996	23	bta-miR-199a-5p	18		Somatic Cell Score	3537
rs440461652	G	G	C/G	7	16508974	16508975	MI0009770	bta-mir-199a-2	-	16508926	16508996	22	bta-miR-199a-5p	17		Somatic Cell Score	3537
rs454086833	A	A	A/T	7	16508976	16508977	MI0009770	bta-mir-199a-2	-	16508926	16508996	20	bta-miR-199a-5p	15		Somatic Cell Score	3537
rs470960780	G	G	C/G	7	16508981	16508982	MI0009770	bta-mir-199a-2	-	16508926	16508996	15	bta-miR-199a-5p	10		Somatic Cell Score	3537
rs442317299	T	T	A/T	7	16508991	16508992	MI0009770	bta-mir-199a-2	-	16508926	16508996	5	bta-miR-199a-5p	0		Somatic Cell Score	3537
rs454039269	C	C	A/C	7	17935958	17935959	MI0011512	bta-mir-2455	-	17935950	17936025	67	bta-miR-2455	21		Somatic Cell Score	3537
rs470948778	C	C	C/G	7	17935959	17935960	MI0011512	bta-mir-2455	-	17935950	17936025	66	bta-miR-2455	20		Somatic Cell Score	3537
rs439622646	C	C	C/G	7	17935960	17935961	MI0011512	bta-mir-2455	-	17935950	17936025	65	bta-miR-2455	19		Somatic Cell Score	3537
rs137716256	T	T	C/T	7	17935961	17935962	MI0011512	bta-mir-2455	-	17935950	17936025	64	bta-miR-2455	18		Somatic Cell Score	3537
rs465293039	C	C	C/T	7	18380022	18380023	MI0011513	bta-mir-339b	-	18379980	18380037	15	bta-miR-339b	15		Somatic Cell Score	3537
rs437209041	C	C	C/T	7	18380023	18380024	MI0011513	bta-mir-339b	-	18379980	18380037	14	bta-miR-339b	14		Somatic Cell Score	3537
rs457387408	G	G	G/T	7	18380025	18380026	MI0011513	bta-mir-339b	-	18379980	18380037	12	bta-miR-339b	12		Somatic Cell Score	3537
rs450524202	A	A	A/G	7	19075242	19075243	MI0031505	bta-mir-3432b	-	19075177	19075273	31	bta-miR-3432b	11		Somatic Cell Score	3537
rs475195499	A	A	A/C/G	7	28718744	28718745	MI0011517	bta-mir-2458	-	28718743	28718809	65	bta-miR-2458	20		Somatic Cell Score	2667
rs443881756	C	C	C/T	7	28718755	28718756	MI0011517	bta-mir-2458	-	28718743	28718809	54	bta-miR-2458	9		Somatic Cell Score	2667
rs436331164	T	T	A/T	9	61455938	61455939	MI0025537	bta-mir-7862	-	61455917	61455979	41				Somatic Cell Score	10077
rs468902155	A	A	A/T	9	61455949	61455950	MI0025537	bta-mir-7862	-	61455917	61455979	30				Somatic Cell Score	10077
rs716017742	T	T	G/T	X	20461142	20461143	MI0011546	bta-mir-2484	-	20461131	20461206	64	bta-miR-2484	23		Somatic Cell Score	32256
rs434782032	A	A	A/C	X	20461150	20461151	MI0011546	bta-mir-2484	-	20461131	20461206	56	bta-miR-2484	15		Somatic Cell Score	32256
rs453234263	G	G	G/T	X	20461152	20461153	MI0011546	bta-mir-2484	-	20461131	20461206	54	bta-miR-2484	13		Somatic Cell Score	32256
rs135930835	T	T	A/T	X	20461153	20461154	MI0011546	bta-mir-2484	-	20461131	20461206	53	bta-miR-2484	12		Somatic Cell Score	32256
rs472524337	A	A	A/C/G	X	20461165	20461166	MI0011546	bta-mir-2484	-	20461131	20461206	41	bta-miR-2484	0		Somatic Cell Score	32256
rs445261754	A	A	A/C	10	42712646	42712647	MI0022268	bta-mir-6517	+	42712635	42712712	13	bta-miR-6517	1	inseed	Somatic Cell Score	3436
rs470115624	G	G	G/T	10	42712647	42712648	MI0022268	bta-mir-6517	+	42712635	42712712	14	bta-miR-6517	2	inseed	Somatic Cell Score	3436
rs437133286	G	G	G/T	10	42712648	42712649	MI0022268	bta-mir-6517	+	42712635	42712712	15	bta-miR-6517	3	inseed	Somatic Cell Score	3436
rs455592409	C	C	A/C	10	42712651	42712652	MI0022268	bta-mir-6517	+	42712635	42712712	18	bta-miR-6517	6	inseed	Somatic Cell Score	3436
rs717661582	C	C	C/T	13	39836884	39836885	MI0011318	bta-mir-2305	+	39836873	39836938	13	bta-miR-2305	8	inseed	Somatic Cell Score	4983
rs434276652	T	T	G/T	14	1566981	1566982	MI0011321	bta-mir-2308	+	1566933	1567001	50	bta-miR-2308	5	inseed	Somatic Cell Score	3517
rs455948057	T	T	G/T	14	1566982	1566983	MI0011321	bta-mir-2308	+	1566933	1567001	51	bta-miR-2308	6	inseed	Somatic Cell Score	3517
rs461162014	T	T	C/T	14	1883905	1883906	MI0010473	bta-mir-1839	-	1883846	1883917	12	bta-miR-1839	6	inseed	Somatic Cell Score	3517
rs482944245	A	A	A/C	14	1883906	1883907	MI0010473	bta-mir-1839	-	1883846	1883917	11	bta-miR-1839	5	inseed	Somatic Cell Score	3517
rs456349159	T	T	G/T	14	2071862	2071863	MI0011322	bta-mir-2309	+	2071851	2071925	13	bta-miR-2309	1	inseed	Somatic Cell Score	3517
rs383888905	G	G	A/G	14	2071867	2071868	MI0011322	bta-mir-2309	+	2071851	2071925	18	bta-miR-2309	6	inseed	Somatic Cell Score	3517
rs438345478	T	T	G/T	14	2071868	2071869	MI0011322	bta-mir-2309	+	2071851	2071925	19	bta-miR-2309	7	inseed	Somatic Cell Score	3517
rs453799397	G	G	C/G	14	2071869	2071870	MI0011322	bta-mir-2309	+	2071851	2071925	20	bta-miR-2309	8	inseed	Somatic Cell Score	3517
rs451223603	A	A	A/G	15	22135441	22135442	MI0005068	bta-mir-34c	+	22135426	22135502	17	bta-miR-34c	3	inseed	Somatic Cell Score	3416
rs207829955	C	C	C/T	18	8166102	8166103	MI0013056	bta-mir-2883	+	8166056	8166120	48	bta-miR-2883	4	inseed	Somatic Cell Score	3554
rs382388531	G	G	A/G	18	8166103	8166104	MI0013056	bta-mir-2883	+	8166056	8166120	49	bta-miR-2883	5	inseed	Somatic Cell Score	3554
rs480479396	T	T	G/T	18	8166106	8166107	MI0013056	bta-mir-2883	+	8166056	8166120	52	bta-miR-2883	8	inseed	Somatic Cell Score	3554
rs441022360	A	A	A/G	18	11939491	11939492	MI0011350	bta-mir-2325a	-	11939464	11939538	47	bta-miR-2325a	7	inseed	Somatic Cell Score	3554
rs461123334	A	A	A/C	18	11939496	11939497	MI0011350	bta-mir-2325a	-	11939464	11939538	42	bta-miR-2325a	2	inseed	Somatic Cell Score	3554
rs378304784	G	G	-/G	18	11975859	11975860	MI0011351	bta-mir-2326	-	11975836	11975909	50	bta-miR-2326	6	inseed	Somatic Cell Score	3554
rs455565243	G	G	G/T	18	11975863	11975864	MI0011351	bta-mir-2326	-	11975836	11975909	46	bta-miR-2326	2	inseed	Somatic Cell Score	3554
rs437480653	A	A	A/G	18	34957633	34957634	MI0009800	bta-mir-328	-	34957610	34957701	68	bta-miR-328	8	inseed	Somatic Cell Score	9904
rs457443391	A	A	A/T	18	34957639	34957640	MI0009800	bta-mir-328	-	34957610	34957701	62	bta-miR-328	2	inseed	Somatic Cell Score	9904
rs433962559	A	A	A/C	18	37088195	37088196	MI0005010	bta-mir-140	+	37088137	37088230	60	bta-miR-140	3	inseed	Somatic Cell Score	9904
rs434053279	C	C	C/T	18	39351767	39351768	MI0011353	bta-mir-2328	+	39351757	39351834	12	bta-miR-2328-5p	1	inseed	Somatic Cell Score	9904
rs211359618	C	C	C/G	18	39351768	39351769	MI0011353	bta-mir-2328	+	39351757	39351834	13	bta-miR-2328-5p	2	inseed	Somatic Cell Score	9904
rs447815682	C	C	A/C	18	39351772	39351773	MI0011353	bta-mir-2328	+	39351757	39351834	17	bta-miR-2328-5p	6	inseed	Somatic Cell Score	9904
rs455844007	C	C	C/T	18	39351809	39351810	MI0011353	bta-mir-2328	+	39351757	39351834	54	bta-miR-2328-3p	2	inseed	Somatic Cell Score	9904
rs472868008	T	T	A/T	18	39351811	39351812	MI0011353	bta-mir-2328	+	39351757	39351834	56	bta-miR-2328-3p	4	inseed	Somatic Cell Score	9904
rs483315266	A	A	A/G	18	40433088	40433089	MI0013076	bta-mir-2901	+	40433025	40433107	65	bta-miR-2901	2	inseed	Somatic Cell Score	9904
rs444655049	G	G	A/G	18	40433089	40433090	MI0013076	bta-mir-2901	+	40433025	40433107	66	bta-miR-2901	3	inseed	Somatic Cell Score	9904
rs448380039	T	T	A/G/T	18	40433090	40433091	MI0013076	bta-mir-2901	+	40433025	40433107	67	bta-miR-2901	4	inseed	Somatic Cell Score	9904
rs468599425	G	G	C/G	18	40433091	40433092	MI0013076	bta-mir-2901	+	40433025	40433107	68	bta-miR-2901	5	inseed	Somatic Cell Score	9904
rs434028650	T	T	C/T	18	40433093	40433094	MI0013076	bta-mir-2901	+	40433025	40433107	70	bta-miR-2901	7	inseed	Somatic Cell Score	9904
rs109462250	G	G	C/T	18	42198086	42198087	MI0013074	bta-mir-2899	+	42198046	42198113	42	bta-miR-2899	1	inseed	Somatic Cell Score	9904
rs443069875	T	T	G/T	18	54224748	54224749	MI0013072	bta-mir-2897	+	54224747	54224815	3	bta-miR-2897	1	inseed	Somatic Cell Score	3622
rs463016346	G	G	C/G/T	18	54224750	54224751	MI0013072	bta-mir-2897	+	54224747	54224815	5	bta-miR-2897	3	inseed	Somatic Cell Score	3622
rs476574836	G	G	C/G/T	18	54224751	54224752	MI0013072	bta-mir-2897	+	54224747	54224815	6	bta-miR-2897	4	inseed	Somatic Cell Score	3622
rs438868336	A	A	A/T	18	54224752	54224753	MI0013072	bta-mir-2897	+	54224747	54224815	7	bta-miR-2897	5	inseed	Somatic Cell Score	3622
rs459001471	G	G	C/G	18	54224753	54224754	MI0013072	bta-mir-2897	+	54224747	54224815	8	bta-miR-2897	6	inseed	Somatic Cell Score	3622
rs479147536	G	G	C/G	18	54224754	54224755	MI0013072	bta-mir-2897	+	54224747	54224815	9	bta-miR-2897	7	inseed	Somatic Cell Score	3622
rs479446766	T	T	A/T	18	56285116	56285117	MI0011356	bta-mir-2330	-	56285098	56285175	59	bta-miR-2330-3p	8	inseed	Somatic Cell Score	3622
rs446455722	A	A	A/G	18	56285121	56285122	MI0011356	bta-mir-2330	-	56285098	56285175	54	bta-miR-2330-3p	3	inseed	Somatic Cell Score	3622
rs527188487	A	A	-/A	19	9527330	9527331	MI0005011	bta-mir-142	-	9527305	9527391	61	bta-miR-142-3p	7	inseed	Somatic Cell Score	3623
rs462302815	A	A	A/T	19	10339895	10339896	MI0009840	bta-mir-454	-	10339845	10339958	63	bta-miR-454	1	inseed	Somatic Cell Score	3623
rs522984380	-	-	-/A	19	15308159	15308159	MI0011357	bta-mir-2331	+	15308148	15308218	12	bta-miR-2331-5p	7	inseed	Somatic Cell Score	3623
rs446711191	T	T	G/T	19	15308159	15308160	MI0011357	bta-mir-2331	+	15308148	15308218	13	bta-miR-2331-5p	7	inseed	Somatic Cell Score	3623
rs435568238	T	T	G/T	19	18813607	18813608	MI0011359	bta-mir-2333	-	18813556	18813618	11	bta-miR-2333	8	inseed	Somatic Cell Score	10446
rs455766561	C	C	C/T	19	18813609	18813610	MI0011359	bta-mir-2333	-	18813556	18813618	9	bta-miR-2333	6	inseed	Somatic Cell Score	10446
rs475904933	T	T	C/T	19	18813611	18813612	MI0011359	bta-mir-2333	-	18813556	18813618	7	bta-miR-2333	4	inseed	Somatic Cell Score	10446
rs460874104	G	G	A/G	19	18824245	18824246	MI0005014	bta-mir-193a	-	18824221	18824301	56	bta-miR-193a-3p	8	inseed	Somatic Cell Score	10446
rs474480147	C	C	C/G	19	18824248	18824249	MI0005014	bta-mir-193a	-	18824221	18824301	53	bta-miR-193a-3p	5	inseed	Somatic Cell Score	10446
rs443070258	T	T	G/T	19	18824252	18824253	MI0005014	bta-mir-193a	-	18824221	18824301	49	bta-miR-193a-3p	1	inseed	Somatic Cell Score	10446
rs462812765	A	A	A/C	19	18824286	18824287	MI0005014	bta-mir-193a	-	18824221	18824301	15	bta-miR-193a-5p	1	inseed	Somatic Cell Score	10446
rs468739756	A	A	A/C	19	20796908	20796909	MI0009837	bta-mir-451	-	20796860	20796930	22	bta-miR-451	7	inseed	Somatic Cell Score	10446
rs435743296	T	T	A/T	19	20796912	20796913	MI0009837	bta-mir-451	-	20796860	20796930	18	bta-miR-451	3	inseed	Somatic Cell Score	10446
rs444318114	G	G	G/T	19	22824686	22824687	MI0011362	bta-mir-2336	+	22824635	22824710	53	bta-miR-2336	5	inseed	Somatic Cell Score	10446
rs470938322	G	G	A/G	19	23382460	23382461	MI0005041	bta-mir-22	-	23382435	23382519	59	bta-miR-22-3p	7	inseed	Somatic Cell Score	10446
rs444497615	A	A	A/T	19	23382499	23382500	MI0005041	bta-mir-22	-	23382435	23382519	20	bta-miR-22-5p	6	inseed	Somatic Cell Score	10446
rs462828661	A	A	A/G	19	23382501	23382502	MI0005041	bta-mir-22	-	23382435	23382519	18	bta-miR-22-5p	4	inseed	Somatic Cell Score	10446
rs462714904	G	G	A/G	19	23651174	23651175	MI0005028	bta-mir-132	-	23651140	23651240	66	bta-miR-132	8	inseed	Somatic Cell Score	10446
rs481284131	A	A	A/G	19	23651175	23651176	MI0005028	bta-mir-132	-	23651140	23651240	65	bta-miR-132	7	inseed	Somatic Cell Score	10446
rs441857004	T	T	G/T	19	23651177	23651178	MI0005028	bta-mir-132	-	23651140	23651240	63	bta-miR-132	5	inseed	Somatic Cell Score	10446
rs133988074	A	A	A/T	19	23651181	23651182	MI0005028	bta-mir-132	-	23651140	23651240	59	bta-miR-132	1	inseed	Somatic Cell Score	10446
rs453415255	G	G	A/G	19	23651641	23651642	MI0009776	bta-mir-212	-	23651570	23651680	39	bta-miR-212	8	inseed	Somatic Cell Score	10446
rs472102044	C	C	A/C	19	23651643	23651644	MI0009776	bta-mir-212	-	23651570	23651680	37	bta-miR-212	6	inseed	Somatic Cell Score	10446
rs439103821	A	A	A/C	19	23651644	23651645	MI0009776	bta-mir-212	-	23651570	23651680	36	bta-miR-212	5	inseed	Somatic Cell Score	10446
rs456883153	A	A	A/C	19	23651645	23651646	MI0009776	bta-mir-212	-	23651570	23651680	35	bta-miR-212	4	inseed	Somatic Cell Score	10446
rs475412026	T	T	C/G/T	19	23651648	23651649	MI0009776	bta-mir-212	-	23651570	23651680	32	bta-miR-212	1	inseed	Somatic Cell Score	10446
rs468641810	A	A	A/T	19	26741760	26741761	MI0011364	bta-mir-199c	+	26741713	26741788	49	bta-miR-199c	2	inseed	Somatic Cell Score	10446
rs472006534	C	C	A/C	19	27441412	27441413	MI0005459	bta-mir-195	-	27441343	27441429	17	bta-miR-195	3	inseed	Somatic Cell Score	10446
rs516014136	C	C	A/C	19	31973561	31973562	MI0011366	bta-mir-2339	-	31973541	31973612	51	bta-miR-2339	6	inseed	Somatic Cell Score	10446
rs469415209	T	T	G/T	19	35249072	35249073	MI0009808	bta-mir-33b	+	35249052	35249145	22	bta-miR-33b	5	inseed	Somatic Cell Score	10446
rs450745650	A	A	A/C	19	39081230	39081231	MI0015944	bta-mir-2957	-	39081172	39081242	12	bta-miR-2957	7	inseed	Somatic Cell Score	10446
rs469287676	T	T	C/T	19	39081233	39081234	MI0015944	bta-mir-2957	-	39081172	39081242	9	bta-miR-2957	4	inseed	Somatic Cell Score	10446
rs477805418	T	T	C/T	19	39081234	39081235	MI0015944	bta-mir-2957	-	39081172	39081242	8	bta-miR-2957	3	inseed	Somatic Cell Score	10446
rs444814245	G	G	A/C/G	19	39081236	39081237	MI0015944	bta-mir-2957	-	39081172	39081242	6	bta-miR-2957	1	inseed	Somatic Cell Score	10446
rs480337986	G	G	A/G	19	40516467	40516468	MI0011370	bta-mir-2342	+	40516423	40516496	46	bta-miR-2342	3	inseed	Somatic Cell Score	10446
rs448978395	G	G	G/T	19	40516470	40516471	MI0011370	bta-mir-2342	+	40516423	40516496	49	bta-miR-2342	6	inseed	Somatic Cell Score	10446
rs462699062	A	A	A/C	19	40516471	40516472	MI0011370	bta-mir-2342	+	40516423	40516496	50	bta-miR-2342	7	inseed	Somatic Cell Score	10446
rs482810551	A	A	A/T	19	40516472	40516473	MI0011370	bta-mir-2342	+	40516423	40516496	51	bta-miR-2342	8	inseed	Somatic Cell Score	10446
rs444336716	T	T	A/G/T	19	40683982	40683983	MI0021119	bta-mir-4286-1	-	40683920	40683995	13	bta-miR-4286	6	inseed	Somatic Cell Score	10446
rs457950680	T	T	G/T	19	40683987	40683988	MI0021119	bta-mir-4286-1	-	40683920	40683995	8	bta-miR-4286	1	inseed	Somatic Cell Score	10446
rs444864165	T	T	C/T	19	45204980	45204981	MI0011371	bta-mir-2343	-	45204924	45204997	17	bta-miR-2343	7	inseed	Somatic Cell Score	10446
rs464780879	T	T	C/T	19	45204985	45204986	MI0011371	bta-mir-2343	-	45204924	45204997	12	bta-miR-2343	2	inseed	Somatic Cell Score	10446
rs720892828	G	G	A/G	19	50423928	50423929	MI0011372	bta-mir-2344	-	50423906	50423966	38	bta-miR-2344	4	inseed	Somatic Cell Score	19038
rs799439911	A	A	A/C	19	50853984	50853985	MI0011373	bta-mir-2345	-	50853965	50854027	43	bta-miR-2345	5	inseed	Somatic Cell Score	19038
rs797939419	A	A	A/C	19	50853986	50853987	MI0011373	bta-mir-2345	-	50853965	50854027	41	bta-miR-2345	3	inseed	Somatic Cell Score	19038
rs467169198	A	A	A/T	19	50931447	50931448	MI0011373_3	bta-mir-2345	-	50931428	50931490	43	bta-miR-2345	5	inseed	Somatic Cell Score	19038
rs469006189	G	G	A/G	19	50968740	50968741	MI0011373_4	bta-mir-2345	+	50968696	50968758	46	bta-miR-2345	6	inseed	Somatic Cell Score	19038
rs466380763	C	C	A/C	19	52189684	52189685	MI0009805	bta-mir-338	+	52189629	52189720	57	bta-miR-338	1	inseed	Somatic Cell Score	19038
rs452002552	T	T	C/G/T	19	54657751	54657752	MI0011376	bta-mir-2348	+	54657733	54657811	20	bta-miR-2348	5	inseed	Somatic Cell Score	10446
rs475261647	G	G	G/T	19	54657753	54657754	MI0011376	bta-mir-2348	+	54657733	54657811	22	bta-miR-2348	7	inseed	Somatic Cell Score	10446
rs454588466	A	A	A/T	2	62007777	62007778	MI0004755	bta-mir-128-1	-	62007752	62007833	56	bta-miR-128	7	inseed	Somatic Cell Score	3601
rs378184310	G	G	A/G	20	10187810	10187811	MI0025528	bta-mir-7858	-	10187790	10187848	38	bta-miR-7858	2	inseed	Somatic Cell Score	2683
rs434467411	A	A	A/C	21	19989086	19989087	MI0010471	bta-mir-7-1	+	19989064	19989161	24	bta-miR-7	2	inseed	Somatic Cell Score	5446
rs482246126	C	C	C/G	21	21157523	21157524	MI0011394	bta-mir-2363-2	-	21157505	21157576	53	bta-miR-2363	8	inseed	Somatic Cell Score	5446
rs799341618	-	-	-/A	21	21157527	21157527	MI0011394	bta-mir-2363-2	-	21157505	21157576	49	bta-miR-2363	4	inseed	Somatic Cell Score	5446
rs797501154	T	T	G/T	21	21157527	21157528	MI0011394	bta-mir-2363-2	-	21157505	21157576	49	bta-miR-2363	4	inseed	Somatic Cell Score	5446
rs450781760	G	G	C/G	21	21157529	21157530	MI0011394	bta-mir-2363-2	-	21157505	21157576	47	bta-miR-2363	2	inseed	Somatic Cell Score	5446
rs454109370	G	G	G/T	21	21250121	21250122	MI0009912	bta-mir-9-1	+	21250101	21250190	22	bta-miR-9-5p	5	inseed	Somatic Cell Score	5446
rs470889289	T	T	G/T	21	21250122	21250123	MI0009912	bta-mir-9-1	+	21250101	21250190	23	bta-miR-9-5p	6	inseed	Somatic Cell Score	5446
rs462009628	A	A	A/T	21	21250158	21250159	MI0009912	bta-mir-9-1	+	21250101	21250190	59	bta-miR-9-3p	3	inseed	Somatic Cell Score	5446
rs518115703	-	-	-/A	21	21250162	21250162	MI0009912	bta-mir-9-1	+	21250101	21250190	62	bta-miR-9-3p	7	inseed	Somatic Cell Score	5446
rs467546527	A	A	A/C	21	33857326	33857327	MI0009879	bta-mir-631	+	33857312	33857386	16	bta-miR-631	1	inseed	Somatic Cell Score	5446
rs525175244	T	T	-/T	21	33857333	33857334	MI0009879	bta-mir-631	+	33857312	33857386	23	bta-miR-631	8	inseed	Somatic Cell Score	5446
rs459589006	T	T	G/T	23	24308098	24308099	MI0009772	bta-mir-206	+	24308042	24308127	58	bta-miR-206	4	inseed	Somatic Cell Score	2688
rs479577983	G	G	A/G	23	24308099	24308100	MI0009772	bta-mir-206	+	24308042	24308127	59	bta-miR-206	5	inseed	Somatic Cell Score	2688
rs445319179	A	A	A/C	23	24308101	24308102	MI0009772	bta-mir-206	+	24308042	24308127	61	bta-miR-206	7	inseed	Somatic Cell Score	2688
rs465270567	A	A	A/G	23	24308102	24308103	MI0009772	bta-mir-206	+	24308042	24308127	62	bta-miR-206	8	inseed	Somatic Cell Score	2688
rs458424573	G	G	G/T	23	24312379	24312380	MI0009734	bta-mir-133b	+	24312330	24312413	51	bta-miR-133b	2	inseed	Somatic Cell Score	2688
rs478284703	T	T	C/T	23	24312381	24312382	MI0009734	bta-mir-133b	+	24312330	24312413	53	bta-miR-133b	4	inseed	Somatic Cell Score	2688
rs436700829	T	T	C/T	23	28203234	28203235	MI0009903	bta-mir-877	-	28203151	28203252	18	bta-miR-877	8	inseed	Somatic Cell Score	4989
rs454510623	C	C	C/G	23	28203236	28203237	MI0009903	bta-mir-877	-	28203151	28203252	16	bta-miR-877	6	inseed	Somatic Cell Score	4989
rs476247953	T	T	C/T	23	28203237	28203238	MI0009903	bta-mir-877	-	28203151	28203252	15	bta-miR-877	5	inseed	Somatic Cell Score	4989
rs443320667	T	T	C/T	23	28203239	28203240	MI0009903	bta-mir-877	-	28203151	28203252	13	bta-miR-877	3	inseed	Somatic Cell Score	4989
rs458682455	A	A	A/C/G	23	28203240	28203241	MI0009903	bta-mir-877	-	28203151	28203252	12	bta-miR-877	2	inseed	Somatic Cell Score	4989
rs520739577	-	-	-/TC	23	31589226	31589226	MI0022331	bta-mir-6531	-	31589157	31589240	14	bta-miR-6531	4	inseed	Somatic Cell Score	2688
rs468438074	T	T	C/T	23	31589226	31589227	MI0022331	bta-mir-6531	-	31589157	31589240	14	bta-miR-6531	4	inseed	Somatic Cell Score	2688
rs453769587	C	C	A/C	25	13339534	13339535	MI0009764	bta-mir-193b	+	13339483	13339565	53	bta-miR-193b	1	inseed	Somatic Cell Score	4993
rs208131360	G	G	C/G	25	35300153	35300154	MI0011428	bta-mir-2388	-	35300128	35300206	53	bta-miR-2388-3p	4	inseed	Somatic Cell Score	10347
rs449894115	A	A	A/G	5	25849799	25849800	MI0005030	bta-mir-148b	-	25849764	25849853	54	bta-miR-148b	1	inseed	Somatic Cell Score	20620
rs452341312	A	A	A/G	5	26199862	26199863	MI0009766	bta-mir-196a-2	-	26199801	26199885	23	bta-miR-196a	8	inseed	Somatic Cell Score	20620
rs470861209	C	C	C/T	5	26199863	26199864	MI0009766	bta-mir-196a-2	-	26199801	26199885	22	bta-miR-196a	7	inseed	Somatic Cell Score	20620
rs468749593	G	G	C/G	5	30251654	30251655	MI0011475	bta-mir-2425	+	30251637	30251717	19	bta-miR-2425-5p	4	inseed	Somatic Cell Score	2659
rs134756375	G	G	C/G	5	30251689	30251690	MI0011475	bta-mir-2425	+	30251637	30251717	54	bta-miR-2425-3p	2	inseed	Somatic Cell Score	2659
rs443651990	A	A	A/C	5	30251693	30251694	MI0011475	bta-mir-2425	+	30251637	30251717	58	bta-miR-2425-3p	6	inseed	Somatic Cell Score	2659
rs433455703	A	A	A/C/G	5	48164083	48164084	MI0009896	bta-mir-763	-	48164007	48164126	43	bta-miR-763	6	inseed	Somatic Cell Score	20620
rs456821331	G	G	C/G	5	48164084	48164085	MI0009896	bta-mir-763	-	48164007	48164126	42	bta-miR-763	5	inseed	Somatic Cell Score	20620
rs476820905	C	C	C/G	5	48164085	48164086	MI0009896	bta-mir-763	-	48164007	48164126	41	bta-miR-763	4	inseed	Somatic Cell Score	20620
rs435813492	T	T	C/T	5	48164086	48164087	MI0009896	bta-mir-763	-	48164007	48164126	40	bta-miR-763	3	inseed	Somatic Cell Score	20620
rs455946744	G	G	C/G/T	5	48164087	48164088	MI0009896	bta-mir-763	-	48164007	48164126	39	bta-miR-763	2	inseed	Somatic Cell Score	20620
rs472659759	G	G	C/G	5	48164088	48164089	MI0009896	bta-mir-763	-	48164007	48164126	38	bta-miR-763	1	inseed	Somatic Cell Score	20620
rs454177120	T	T	G/T	5	48952323	48952324	MI0011479	bta-mir-2429	-	48952298	48952372	49	bta-miR-2429	4	inseed	Somatic Cell Score	20620
rs436195111	A	A	A/C	5	51209153	51209154	MI0005065	bta-let-7i	-	51209081	51209164	11	bta-let-7i	6	inseed	Somatic Cell Score	20620
rs454683892	T	T	G/T	5	51209156	51209157	MI0005065	bta-let-7i	-	51209081	51209164	8	bta-let-7i	3	inseed	Somatic Cell Score	20620
rs451767588	A	A	A/T	5	56293229	56293230	MI0011480	bta-mir-2430	-	56293171	56293243	14	bta-miR-2430	7	inseed	Somatic Cell Score	20620
rs519914243	T	T	-/T	5	56655758	56655759	MI0011481	bta-mir-2431	-	56655700	56655767	9	bta-miR-2431-5p	7	inseed	Somatic Cell Score	20620
rs476284669	C	C	C/T	5	56655761	56655762	MI0011481	bta-mir-2431	-	56655700	56655767	6	bta-miR-2431-5p	4	inseed	Somatic Cell Score	20620
rs443267249	T	T	G/T	5	56655763	56655764	MI0011481	bta-mir-2431	-	56655700	56655767	4	bta-miR-2431-5p	2	inseed	Somatic Cell Score	20620
rs517405627	G	G	A/G	5	57400264	57400265	MI0011484	bta-mir-2433	-	57400205	57400281	17	bta-miR-2433	7	inseed	Somatic Cell Score	20620
rs460355881	T	T	C/T	7	12915276	12915277	MI0009754	bta-mir-181d	+	12915238	12915350	40	bta-miR-181d	4	inseed	Somatic Cell Score	3537
rs439776379	T	T	A/C/T	7	12981809	12981810	MI0004746	bta-mir-27a	-	12981791	12981868	59	bta-miR-27a-3p	6	inseed	Somatic Cell Score	3537
rs469598597	T	T	G/T	7	12981847	12981848	MI0004746	bta-mir-27a	-	12981791	12981868	21	bta-miR-27a-5p	8	inseed	Somatic Cell Score	3537
rs449490612	G	G	G/T	7	15917841	15917842	MI0011511	bta-mir-2454	-	15917819	15917890	49	bta-miR-2454-3p	5	inseed	Somatic Cell Score	3537
rs460558928	C	C	C/G	7	16508931	16508932	MI0015950	bta-mir-3604-1	+	16508922	16508999	11	bta-miR-3604	2	inseed	Somatic Cell Score	3537
rs477423465	T	T	G/T	7	16508935	16508936	MI0015950	bta-mir-3604-1	+	16508922	16508999	15	bta-miR-3604	6	inseed	Somatic Cell Score	3537
rs439820718	G	G	G/T	7	16508936	16508937	MI0015950	bta-mir-3604-1	+	16508922	16508999	16	bta-miR-3604	7	inseed	Somatic Cell Score	3537
rs463088231	A	A	A/C	7	16508942	16508943	MI0009770	bta-mir-199a-2	-	16508926	16508996	54	bta-miR-199a-3p	8	inseed	Somatic Cell Score	3537
rs483351105	T	T	G/T	7	16508949	16508950	MI0009770	bta-mir-199a-2	-	16508926	16508996	47	bta-miR-199a-3p	1	inseed	Somatic Cell Score	3537
rs439759364	A	A	A/C	7	16508983	16508984	MI0009770	bta-mir-199a-2	-	16508926	16508996	13	bta-miR-199a-5p	8	inseed	Somatic Cell Score	3537
rs463026768	T	T	G/T	7	16508987	16508988	MI0009770	bta-mir-199a-2	-	16508926	16508996	9	bta-miR-199a-5p	4	inseed	Somatic Cell Score	3537
rs483302479	G	G	G/T	7	16508990	16508991	MI0009770	bta-mir-199a-2	-	16508926	16508996	6	bta-miR-199a-5p	1	inseed	Somatic Cell Score	3537
rs474201197	A	A	A/G	7	18380032	18380033	MI0011513	bta-mir-339b	-	18379980	18380037	5	bta-miR-339b	5	inseed	Somatic Cell Score	3537
rs380636731	G	G	A/G	7	19075250	19075251	MI0031505	bta-mir-3432b	-	19075177	19075273	23	bta-miR-3432b	3	inseed	Somatic Cell Score	3537
rs478985812	T	T	C/T	7	21255399	21255400	MI0011514	bta-mir-1434	+	21255389	21255461	12	bta-miR-1434-5p	4	inseed	Somatic Cell Score	3537
rs525626025	C	C	A/C	7	21271977	21271978	MI0011515	bta-mir-2456	+	21271931	21272002	48	bta-miR-2456	2	inseed	Somatic Cell Score	3537
rs378202959	C	C	C/T	8	46941437	46941438	MI0021132	bta-mir-2285i	+	46941385	46941462	54	bta-miR-2285i	4	inseed	Somatic Cell Score	19032
rs382667897	T	T	C/T	10	47321115	47321116	MI0009762	bta-mir-190a	-	47321061	47321145	30	bta-miR-190a	16		SCC	1692	Somatic Cell Score	3436
rs475153554	T	T	G/T	10	47321119	47321120	MI0009762	bta-mir-190a	-	47321061	47321145	26	bta-miR-190a	12		SCC	1692	Somatic Cell Score	3436
rs469279334	C	C	A/C	13	47087670	47087671	MI0022276	bta-mir-2285m-2	-	47087660	47087740	70	bta-miR-2285m	21		Somatic Cell Score	4983
rs437860195	A	A	A/G	13	47087672	47087673	MI0022276	bta-mir-2285m-2	-	47087660	47087740	68	bta-miR-2285m	19		Somatic Cell Score	4983
rs454456140	G	G	G/T	13	47087676	47087677	MI0022276	bta-mir-2285m-2	-	47087660	47087740	64	bta-miR-2285m	15		Somatic Cell Score	4983
rs474579220	T	T	C/T	13	47087677	47087678	MI0022276	bta-mir-2285m-2	-	47087660	47087740	63	bta-miR-2285m	14		Somatic Cell Score	4983
rs433559601	A	A	A/T	13	47087680	47087681	MI0022276	bta-mir-2285m-2	-	47087660	47087740	60	bta-miR-2285m	11		Somatic Cell Score	4983
rs453868179	T	T	C/T	13	47087682	47087683	MI0022276	bta-mir-2285m-2	-	47087660	47087740	58	bta-miR-2285m	9		Somatic Cell Score	4983
rs460189731	C	C	A/C	13	51742435	51742436	MI0005456	bta-mir-103-2	-	51742422	51742497	62	bta-miR-103	15		Somatic Cell Score	2775
rs450415677	C	C	A/C	14	8084756	8084757	MI0004761	bta-mir-30b	+	8084721	8084808	37	bta-miR-30b-5p	19		Somatic Cell Score	2734
rs433044593	T	T	C/T	14	8084786	8084787	MI0004761	bta-mir-30b	+	8084721	8084808	67	bta-miR-30b-3p	11		Somatic Cell Score	2734
rs479454440	C	C	A/C	18	56407843	56407844	MI0005058	bta-mir-150	-	56407843	56407942	99				SCC	2705	Somatic Cell Score	3622
rs447130486	G	G	C/G	18	56407845	56407846	MI0005058	bta-mir-150	-	56407843	56407942	97				SCC	2705	Somatic Cell Score	3622
rs465662285	A	A	A/C	18	56407851	56407852	MI0005058	bta-mir-150	-	56407843	56407942	91				SCC	2705	Somatic Cell Score	3622
rs477627257	T	T	A/G/T	18	56407852	56407853	MI0005058	bta-mir-150	-	56407843	56407942	90				SCC	2705	Somatic Cell Score	3622
rs451149332	C	C	A/C	18	56407853	56407854	MI0005058	bta-mir-150	-	56407843	56407942	89				SCC	2705	Somatic Cell Score	3622
rs469600405	C	C	C/G	18	56407857	56407858	MI0005058	bta-mir-150	-	56407843	56407942	85				SCC	2705	Somatic Cell Score	3622
rs436446922	A	A	A/G	18	56407858	56407859	MI0005058	bta-mir-150	-	56407843	56407942	84				SCC	2705	Somatic Cell Score	3622
rs455038443	T	T	C/T	18	56407861	56407862	MI0005058	bta-mir-150	-	56407843	56407942	81				SCC	2705	Somatic Cell Score	3622
rs466944838	T	T	C/T	18	56407869	56407870	MI0005058	bta-mir-150	-	56407843	56407942	73				SCC	2705	Somatic Cell Score	3622
rs434020222	A	A	A/C/G	18	56407876	56407877	MI0005058	bta-mir-150	-	56407843	56407942	66				SCC	2705	Somatic Cell Score	3622
rs453172786	G	G	G/T	18	56407880	56407881	MI0005058	bta-mir-150	-	56407843	56407942	62				SCC	2705	Somatic Cell Score	3622
rs471700938	G	G	C/G/T	18	56407888	56407889	MI0005058	bta-mir-150	-	56407843	56407942	54				SCC	2705	Somatic Cell Score	3622
rs461049036	T	T	G/T	18	56407930	56407931	MI0005058	bta-mir-150	-	56407843	56407942	12				SCC	2705	Somatic Cell Score	3622
rs479447705	A	A	A/C	18	56407932	56407933	MI0005058	bta-mir-150	-	56407843	56407942	10				SCC	2705	Somatic Cell Score	3622
rs440025014	G	G	C/G	18	56407938	56407939	MI0005058	bta-mir-150	-	56407843	56407942	4				SCC	2705	Somatic Cell Score	3622
rs382117533	G	G	A/G	26	29429700	29429701	MI0022332	bta-mir-2285k-4	+	29429648	29429720	54	bta-miR-2285k	10		Somatic Cell Score	2736
rs433582479	C	C	C/G	4	47367065	47367066	MI0011465	bta-mir-2284b	-	47367036	47367106	41				Somatic Cell Score	13032
rs453487598	A	A	A/G	5	30952182	30952183	MI0011476	bta-mir-2426	+	30952153	30952226	31	bta-miR-2426	16		Somatic Cell Score	10107
rs473650323	G	G	A/G	5	30952185	30952186	MI0011476	bta-mir-2426	+	30952153	30952226	34	bta-miR-2426	19		Somatic Cell Score	10107
rs442167232	C	C	C/T	10	47321124	47321125	MI0009762	bta-mir-190a	-	47321061	47321145	21	bta-miR-190a	7	inseed	SCC	1692	Somatic Cell Score	3436
rs470669395	G	G	C/G	13	47087684	47087685	MI0022276	bta-mir-2285m-2	-	47087660	47087740	56	bta-miR-2285m	7	inseed	Somatic Cell Score	4983
rs439863837	G	G	G/T	13	47087686	47087687	MI0022276	bta-mir-2285m-2	-	47087660	47087740	54	bta-miR-2285m	5	inseed	Somatic Cell Score	4983
rs464245110	T	T	G/T	14	8084782	8084783	MI0004761	bta-mir-30b	+	8084721	8084808	63	bta-miR-30b-3p	7	inseed	Somatic Cell Score	2734
rs518429713	G	G	A/G	2	47459026	47459027	MI0011383	bta-mir-2354	+	47459010	47459084	18	bta-miR-2354	5	inseed	Somatic Cell Score	16040
rs110817643	C	C	C/T	5	31283923	31283924	MI0010458	bta-mir-1291	+	31283919	31283992	6	bta-miR-1291	4	inseed	Somatic Cell Score	2659
rs481937675	T	T	A/T	6	14163022	14163023	MI0009791	bta-mir-302a	+	14162972	14163041	52	bta-miR-302a	5	inseed	Somatic Cell Score	10439
rs134036560	T	T	C/T	9	61758654	61758655	MI0013079	bta-mir-2903	+	61758630	61758717	26	bta-miR-2903	7	inseed	Somatic Cell Score	10077
rs438682721	C	C	A/C	18	56407908	56407909	MI0005058	bta-mir-150	-	56407843	56407942	34	bta-miR-150	14		SCC	2705	Somatic Cell Score	3622
rs456938611	A	A	A/G	18	56407910	56407911	MI0005058	bta-mir-150	-	56407843	56407942	32	bta-miR-150	12		SCC	2705	Somatic Cell Score	3622
rs453899455	C	C	C/T	4	47367090	47367091	MI0011465	bta-mir-2284b	-	47367036	47367106	16	bta-miR-2284b	9		Somatic Cell Score	13032
rs475416736	T	T	G/T	18	56407915	56407916	MI0005058	bta-mir-150	-	56407843	56407942	27	bta-miR-150	7	inseed	SCC	2705	Somatic Cell Score	3622
rs442430134	G	G	G/T	18	56407920	56407921	MI0005058	bta-mir-150	-	56407843	56407942	22	bta-miR-150	2	inseed	SCC	2705	Somatic Cell Score	3622

## Sheet: SCC
SNP_ID	refNCBI	refUCSC	Allele	Chromosome	chromStart	chromEnd	Pre_miRNA_ID	Pre-miRNA	Strand	Start position of pre-miRNA	End position of pre-miRNA	Position in_pre-miRNA	Name of Mature_sequence	Position in_mature_sequence	inseed	QTL-1	Number of QTL(#)
rs431927661	G	G	G/T	10	30500498	30500499	MI0025184	bta-mir-2285g-2	+	30500492	30500569	8				Somatic Cell Count	2701
rs719200654	C	C	C/T	10	30500500	30500501	MI0025184	bta-mir-2285g-2	+	30500492	30500569	10				Somatic Cell Count	2701
rs456362245	A	A	A/C	10	30500526	30500527	MI0025184	bta-mir-2285g-2	+	30500492	30500569	36				Somatic Cell Count	2701
rs136129862	A	A	A/G	10	30500529	30500530	MI0025184	bta-mir-2285g-2	+	30500492	30500569	39				Somatic Cell Count	2701
rs444533175	T	T	A/T	10	30500530	30500531	MI0025184	bta-mir-2285g-2	+	30500492	30500569	40				Somatic Cell Count	2701
rs109467282	A	A	A/G	10	30500563	30500564	MI0025184	bta-mir-2285g-2	+	30500492	30500569	73				Somatic Cell Count	2701
rs483241785	C	C	C/G	10	30500566	30500567	MI0025184	bta-mir-2285g-2	+	30500492	30500569	76				Somatic Cell Count	2701
rs444923874	G	G	A/G	10	30500568	30500569	MI0025184	bta-mir-2285g-2	+	30500492	30500569	78				Somatic Cell Count	2701
rs437996939	T	T	A/T	10	47321095	47321096	MI0009762	bta-mir-190a	-	47321061	47321145	50				Somatic Cell Count	1692
rs460322325	G	G	A/G	10	47321138	47321139	MI0009762	bta-mir-190a	-	47321061	47321145	7				Somatic Cell Count	1692
rs523158140	C	C	-/C	10	47321143	47321144	MI0009762	bta-mir-190a	-	47321061	47321145	2				Somatic Cell Count	1692
rs209284124	A	A	A/G	7	45882329	45882330	MI0021138	bta-mir-6120	+	45882305	45882375	26				Somatic Cell Count	2698
rs443506317	G	G	G/T	7	45882370	45882371	MI0021138	bta-mir-6120	+	45882305	45882375	67				Somatic Cell Count	2698
rs440462126	A	A	A/G	10	30500549	30500550	MI0025184	bta-mir-2285g-2	+	30500492	30500569	59	bta-miR-2285g	9		Somatic Cell Count
rs460516878	G	G	A/G/T	10	30500551	30500552	MI0025184	bta-mir-2285g-2	+	30500492	30500569	61	bta-miR-2285g	11		Somatic Cell Count
rs480989467	C	C	A/C	10	30500552	30500553	MI0025184	bta-mir-2285g-2	+	30500492	30500569	62	bta-miR-2285g	12		Somatic Cell Count
rs443092119	G	G	G/T	10	30500558	30500559	MI0025184	bta-mir-2285g-2	+	30500492	30500569	68	bta-miR-2285g	18		Somatic Cell Count
rs382667897	T	T	C/T	10	47321115	47321116	MI0009762	bta-mir-190a	-	47321061	47321145	30	bta-miR-190a	16		Somatic Cell Count
rs475153554	T	T	G/T	10	47321119	47321120	MI0009762	bta-mir-190a	-	47321061	47321145	26	bta-miR-190a	12		Somatic Cell Count
rs458138832	G	G	G/T	11	10862188	10862189	MI0011305	bta-mir-2295	-	10862186	10862252	64				Somatic Cell Count
rs435082045	A	A	A/G	11	10862217	10862218	MI0011305	bta-mir-2295	-	10862186	10862252	35				Somatic Cell Count
rs445463552	C	C	C/T	11	10862231	10862232	MI0011305	bta-mir-2295	-	10862186	10862252	21				Somatic Cell Count
rs464837398	G	G	G/T	11	10862232	10862233	MI0011305	bta-mir-2295	-	10862186	10862252	20				Somatic Cell Count
rs436756852	A	A	A/G	11	10862236	10862237	MI0011305	bta-mir-2295	-	10862186	10862252	16				Somatic Cell Count
rs456906049	A	A	A/G	11	10862242	10862243	MI0011305	bta-mir-2295	-	10862186	10862252	10				Somatic Cell Count
rs473918278	C	C	A/C/T	11	10862251	10862252	MI0011305	bta-mir-2295	-	10862186	10862252	1				Somatic Cell Count
rs448777522	T	T	C/T	11	11316159	11316160	MI0011304	bta-mir-2294	+	11316131	11316193	30				Somatic Cell Count
rs465572891	A	A	A/C	11	11316166	11316167	MI0011304	bta-mir-2294	+	11316131	11316193	37				Somatic Cell Count
rs479230315	C	C	A/C	11	11316175	11316176	MI0011304	bta-mir-2294	+	11316131	11316193	46				Somatic Cell Count
rs445088675	T	T	C/T	11	11316180	11316181	MI0011304	bta-mir-2294	+	11316131	11316193	51				Somatic Cell Count
rs479454440	C	C	A/C	18	56407843	56407844	MI0005058	bta-mir-150	-	56407843	56407942	99				Somatic Cell Count
rs447130486	G	G	C/G	18	56407845	56407846	MI0005058	bta-mir-150	-	56407843	56407942	97				Somatic Cell Count
rs465662285	A	A	A/C	18	56407851	56407852	MI0005058	bta-mir-150	-	56407843	56407942	91				Somatic Cell Count
rs477627257	T	T	A/G/T	18	56407852	56407853	MI0005058	bta-mir-150	-	56407843	56407942	90				Somatic Cell Count
rs451149332	C	C	A/C	18	56407853	56407854	MI0005058	bta-mir-150	-	56407843	56407942	89				Somatic Cell Count
rs469600405	C	C	C/G	18	56407857	56407858	MI0005058	bta-mir-150	-	56407843	56407942	85				Somatic Cell Count
rs436446922	A	A	A/G	18	56407858	56407859	MI0005058	bta-mir-150	-	56407843	56407942	84				Somatic Cell Count
rs455038443	T	T	C/T	18	56407861	56407862	MI0005058	bta-mir-150	-	56407843	56407942	81				Somatic Cell Count
rs466944838	T	T	C/T	18	56407869	56407870	MI0005058	bta-mir-150	-	56407843	56407942	73				Somatic Cell Count
rs434020222	A	A	A/C/G	18	56407876	56407877	MI0005058	bta-mir-150	-	56407843	56407942	66				Somatic Cell Count
rs453172786	G	G	G/T	18	56407880	56407881	MI0005058	bta-mir-150	-	56407843	56407942	62				Somatic Cell Count
rs471700938	G	G	C/G/T	18	56407888	56407889	MI0005058	bta-mir-150	-	56407843	56407942	54				Somatic Cell Count
rs461049036	T	T	G/T	18	56407930	56407931	MI0005058	bta-mir-150	-	56407843	56407942	12				Somatic Cell Count
rs479447705	A	A	A/C	18	56407932	56407933	MI0005058	bta-mir-150	-	56407843	56407942	10				Somatic Cell Count
rs440025014	G	G	C/G	18	56407938	56407939	MI0005058	bta-mir-150	-	56407843	56407942	4				Somatic Cell Count
rs458425588	A	A	A/G	21	5654833	5654834	MI0011392	bta-mir-2362	-	5654805	5654871	38				Somatic Cell Count
rs110697855	C	C	A/C	21	5654861	5654862	MI0011392	bta-mir-2362	-	5654805	5654871	10				Somatic Cell Count
rs475800879	A	A	A/C	7	45882366	45882367	MI0021138	bta-mir-6120	+	45882305	45882375	63	bta-miR-6120-3p	21		Somatic Cell Count
rs444345061	G	G	A/G	8	22534851	22534852	MI0004762	bta-mir-31	+	22534797	22534890	56				Somatic Cell Count
rs471848067	A	A	A/G	8	22534868	22534869	MI0004762	bta-mir-31	+	22534797	22534890	73				Somatic Cell Count
rs460528464	C	C	C/T	8	22534880	22534881	MI0004762	bta-mir-31	+	22534797	22534890	85				Somatic Cell Count
rs798867080	C	C	C/T	8	22534888	22534889	MI0004762	bta-mir-31	+	22534797	22534890	93				Somatic Cell Count
rs446079554	C	C	C/G	8	23661691	23661692	MI0009846	bta-mir-491	-	23661686	23661769	78				Somatic Cell Count
rs458196242	C	C	A/C	10	30500542	30500543	MI0025184	bta-mir-2285g-2	+	30500492	30500569	52	bta-miR-2285g	2	inseed	Somatic Cell Count	2701
rs471813993	C	C	A/C	10	30500548	30500549	MI0025184	bta-mir-2285g-2	+	30500492	30500569	58	bta-miR-2285g	8	inseed	Somatic Cell Count	2701
rs442167232	C	C	C/T	10	47321124	47321125	MI0009762	bta-mir-190a	-	47321061	47321145	21	bta-miR-190a	7	inseed	Somatic Cell Count	1692
rs457372538	T	T	G/T	7	45882310	45882311	MI0021138	bta-mir-6120	+	45882305	45882375	7	bta-miR-6120-5p	3	inseed	Somatic Cell Count	2698
rs478189003	G	G	A/C/G	11	10862190	10862191	MI0011305	bta-mir-2295	-	10862186	10862252	62	bta-miR-2295	20		Somatic Cell Count	1693
rs450258617	A	A	A/C	11	10862192	10862193	MI0011305	bta-mir-2295	-	10862186	10862252	60	bta-miR-2295	18		Somatic Cell Count	1693
rs463798346	C	C	A/C	11	10862193	10862194	MI0011305	bta-mir-2295	-	10862186	10862252	59	bta-miR-2295	17		Somatic Cell Count	1693
rs480888596	C	C	C/G	11	10862201	10862202	MI0011305	bta-mir-2295	-	10862186	10862252	51	bta-miR-2295	9		Somatic Cell Count	1693
rs463459264	C	C	C/G	11	11316148	11316149	MI0011304	bta-mir-2294	+	11316131	11316193	19	bta-miR-2294	13		Somatic Cell Count	1693
rs438682721	C	C	A/C	18	56407908	56407909	MI0005058	bta-mir-150	-	56407843	56407942	34	bta-miR-150	14		Somatic Cell Count	2705
rs456938611	A	A	A/G	18	56407910	56407911	MI0005058	bta-mir-150	-	56407843	56407942	32	bta-miR-150	12		Somatic Cell Count	2705
rs716180992	G	G	A/G	8	40562589	40562590	MI0011531	bta-mir-2471	+	40562531	40562600	60	bta-miR-2471-3p	12		Somatic Cell Count	2498
rs449414882	C	C	C/G	11	10862204	10862205	MI0011305	bta-mir-2295	-	10862186	10862252	48	bta-miR-2295	6	inseed	Somatic Cell Count	1693
rs466359082	G	G	C/G	11	10862208	10862209	MI0011305	bta-mir-2295	-	10862186	10862252	44	bta-miR-2295	2	inseed	Somatic Cell Count	1693
rs479258168	T	T	G/T	11	11316141	11316142	MI0011304	bta-mir-2294	+	11316131	11316193	12	bta-miR-2294	6	inseed	Somatic Cell Count	1693
rs475416736	T	T	G/T	18	56407915	56407916	MI0005058	bta-mir-150	-	56407843	56407942	27	bta-miR-150	7	inseed	Somatic Cell Count	2705
rs442430134	G	G	G/T	18	56407920	56407921	MI0005058	bta-mir-150	-	56407843	56407942	22	bta-miR-150	2	inseed	Somatic Cell Count	2705

## Sheet: UDPTH
SNP_ID	refNCBI	refUCSC	Allele	Chromosome	chromStart	chromEnd	Pre_miRNA_ID	Pre-miRNA	Strand	Start position of pre-miRNA	End position of pre-miRNA	Position in_pre-miRNA	Name of Mature_sequence	Position in_mature_sequence	inseed	QTL	Number of QTL(#)
rs476038575	T	T	G/T	16	40485814	40485815	MI0005040	bta-mir-214	-	40485807	40485916	102				Udder depth	1610
rs438427757	T	T	G/T	16	40485815	40485816	MI0005040	bta-mir-214	-	40485807	40485916	101				Udder depth	1610
rs458510642	C	C	A/C	16	40485818	40485819	MI0021116	bta-mir-3120	+	40485817	40485897	3				Udder depth	1610
rs458510642	C	C	A/C	16	40485818	40485819	MI0005040	bta-mir-214	-	40485807	40485916	98				Udder depth	1610
rs478427850	C	C	C/T	16	40485833	40485834	MI0021116	bta-mir-3120	+	40485817	40485897	18				Udder depth	1610
rs447085663	C	C	A/C	16	40485839	40485840	MI0021116	bta-mir-3120	+	40485817	40485897	24				Udder depth	1610
rs460787718	T	T	G/T	16	40485845	40485846	MI0021116	bta-mir-3120	+	40485817	40485897	30				Udder depth	1610
rs521981294	G	G	-/G	16	40485849	40485850	MI0021116	bta-mir-3120	+	40485817	40485897	34				Udder depth	1610
rs521981294	G	G	-/G	16	40485849	40485850	MI0005040	bta-mir-214	-	40485807	40485916	67				Udder depth	1610
rs480911087	T	T	A/G/T	16	40485851	40485852	MI0021116	bta-mir-3120	+	40485817	40485897	36				Udder depth	1610
rs480911087	T	T	A/G/T	16	40485851	40485852	MI0005040	bta-mir-214	-	40485807	40485916	65				Udder depth	1610
rs449605712	G	G	C/G	16	40485852	40485853	MI0021116	bta-mir-3120	+	40485817	40485897	37				Udder depth	1610
rs449605712	G	G	C/G	16	40485852	40485853	MI0005040	bta-mir-214	-	40485807	40485916	64				Udder depth	1610
rs469344681	G	G	G/T	16	40485854	40485855	MI0021116	bta-mir-3120	+	40485817	40485897	39				Udder depth	1610
rs469344681	G	G	G/T	16	40485854	40485855	MI0005040	bta-mir-214	-	40485807	40485916	62				Udder depth	1610
rs438017923	C	C	A/C	16	40485855	40485856	MI0021116	bta-mir-3120	+	40485817	40485897	40				Udder depth	1610
rs438017923	C	C	A/C	16	40485855	40485856	MI0005040	bta-mir-214	-	40485807	40485916	61				Udder depth	1610
rs445338628	T	T	A/T	16	40485859	40485860	MI0021116	bta-mir-3120	+	40485817	40485897	44				Udder depth	1610
rs445338628	T	T	A/T	16	40485859	40485860	MI0005040	bta-mir-214	-	40485807	40485916	57				Udder depth	1610
rs465489637	G	G	A/G/T	16	40485860	40485861	MI0021116	bta-mir-3120	+	40485817	40485897	45				Udder depth	1610
rs465489637	G	G	A/G/T	16	40485860	40485861	MI0005040	bta-mir-214	-	40485807	40485916	56				Udder depth	1610
rs433764920	T	T	G/T	16	40485861	40485862	MI0021116	bta-mir-3120	+	40485817	40485897	46				Udder depth	1610
rs433764920	T	T	G/T	16	40485861	40485862	MI0005040	bta-mir-214	-	40485807	40485916	55				Udder depth	1610
rs453854718	C	C	C/T	16	40485863	40485864	MI0021116	bta-mir-3120	+	40485817	40485897	48				Udder depth	1610
rs453854718	C	C	C/T	16	40485863	40485864	MI0005040	bta-mir-214	-	40485807	40485916	53				Udder depth	1610
rs467547209	A	A	A/C	16	40485869	40485870	MI0005040	bta-mir-214	-	40485807	40485916	47				Udder depth	1610
rs436266404	T	T	G/T	16	40485877	40485878	MI0005040	bta-mir-214	-	40485807	40485916	39				Udder depth	1610
rs456293059	C	C	A/C	16	40485881	40485882	MI0005040	bta-mir-214	-	40485807	40485916	35				Udder depth	1610
rs475999819	T	T	A/T	16	40485893	40485894	MI0021116	bta-mir-3120	+	40485817	40485897	78				Udder depth	1610
rs475999819	T	T	A/T	16	40485893	40485894	MI0005040	bta-mir-214	-	40485807	40485916	23				Udder depth	1610
rs438389020	A	A	A/C/T	16	40485898	40485899	MI0005040	bta-mir-214	-	40485807	40485916	18				Udder depth	1610
rs452087328	T	T	C/T	16	40485900	40485901	MI0005040	bta-mir-214	-	40485807	40485916	16				Udder depth	1610
rs472370292	C	C	A/C	16	40485902	40485903	MI0005040	bta-mir-214	-	40485807	40485916	14				Udder depth	1610
rs440902038	T	T	G/T	16	40485904	40485905	MI0005040	bta-mir-214	-	40485807	40485916	12				Udder depth	1610
rs436368862	C	C	A/C	16	40491613	40491614	MI0004758	bta-mir-199a-1	-	40491602	40491705	92				Udder depth	1610
rs445914213	C	C	C/T	16	40491637	40491638	MI0004758	bta-mir-199a-1	-	40491602	40491705	68				Udder depth	1610
rs455584698	G	G	A/G	16	40491647	40491648	MI0004758	bta-mir-199a-1	-	40491602	40491705	58				Udder depth	1610
rs520802143	T	T	C/T	20	21839511	21839512	MI0021129	bta-mir-2285f-2	+	21839467	21839555	46				Udder depth	4986
rs483261692	T	T	G/T	20	23962992	23962993	MI0009836	bta-mir-449c	-	23962986	23963091	99				Udder depth	4986
rs450403898	T	T	A/T	20	23963013	23963014	MI0009836	bta-mir-449c	-	23962986	23963091	78				Udder depth	4986
rs468876537	A	A	A/C	20	23963020	23963021	MI0009836	bta-mir-449c	-	23962986	23963091	71				Udder depth	4986
rs452578915	G	G	C/G/T	20	23963021	23963022	MI0009836	bta-mir-449c	-	23962986	23963091	70				Udder depth	4986
rs447236445	G	G	A/G	20	23963035	23963036	MI0009836	bta-mir-449c	-	23962986	23963091	56				Udder depth	4986
rs519542159	G	G	A/G	20	23963047	23963048	MI0009836	bta-mir-449c	-	23962986	23963091	44				Udder depth	4986
rs465835880	C	C	A/C	20	23963048	23963049	MI0009836	bta-mir-449c	-	23962986	23963091	43				Udder depth	4986
rs443887639	C	C	C/T	20	23963071	23963072	MI0009836	bta-mir-449c	-	23962986	23963091	20				Udder depth	4986
rs462438981	T	T	C/T	20	23963072	23963073	MI0009836	bta-mir-449c	-	23962986	23963091	19				Udder depth	4986
rs480990168	C	C	A/C	20	23963075	23963076	MI0009836	bta-mir-449c	-	23962986	23963091	16				Udder depth	4986
rs447187719	A	A	A/C/G	20	23963076	23963077	MI0009836	bta-mir-449c	-	23962986	23963091	15				Udder depth	4986
rs465746217	C	C	A/C/G	20	23963077	23963078	MI0009836	bta-mir-449c	-	23962986	23963091	14				Udder depth	4986
rs477671118	A	A	A/C	20	23963078	23963079	MI0009836	bta-mir-449c	-	23962986	23963091	13				Udder depth	4986
rs444883037	C	C	C/T	20	23963081	23963082	MI0009836	bta-mir-449c	-	23962986	23963091	10				Udder depth	4986
rs469735655	G	G	A/G/T	20	23963084	23963085	MI0009836	bta-mir-449c	-	23962986	23963091	7				Udder depth	4986
rs436950674	C	C	C/G/T	20	23963085	23963086	MI0009836	bta-mir-449c	-	23962986	23963091	6				Udder depth	4986
rs522685228	-	-	-/T	20	23963086	23963086	MI0009836	bta-mir-449c	-	23962986	23963091	5				Udder depth	4986
rs472731611	A	A	A/T	20	23963089	23963090	MI0009836	bta-mir-449c	-	23962986	23963091	2				Udder depth	4986
rs526327004	-	-	-/T/TT/TTT	20	23963090	23963090	MI0009836	bta-mir-449c	-	23962986	23963091	1				Udder depth	4986
rs467644831	T	T	A/T	20	23963090	23963091	MI0009836	bta-mir-449c	-	23962986	23963091	1				Udder depth	4986
rs473694656	TT	TT	-/TT	20	23963090	23963092	MI0009836	bta-mir-449c	-	23962986	23963091	1				Udder depth	4986
rs136389052	G	G	C/G	20	23967322	23967323	MI0009835	bta-mir-449b	+	23967269	23967366	55				Udder depth	4986
rs439076656	A	A	A/C	20	23967356	23967357	MI0009835	bta-mir-449b	+	23967269	23967366	89				Udder depth	4986
rs457509046	A	A	A/T	20	23967357	23967358	MI0009835	bta-mir-449b	+	23967269	23967366	90				Udder depth	4986
rs523243857	G	G	A/G	23	32381667	32381668	MI0025541	bta-mir-2285ad	+	32381660	32381717	9				Udder depth	4990
rs715038561	G	G	A/G	23	35647178	35647179	MI0011415	bta-mir-2284c	+	35647120	35647199	60				Udder depth	4990
rs718282657	T	T	C/T	23	35647182	35647183	MI0011415	bta-mir-2284c	+	35647120	35647199	64				Udder depth	4990
rs440212594	G	G	C/G	24	21530903	21530904	MI0009759	bta-mir-187	+	21530900	21531008	5				Udder depth	10340
rs460371655	C	C	C/G	24	21530906	21530907	MI0009759	bta-mir-187	+	21530900	21531008	8				Udder depth	10340
rs477218504	C	C	A/C	24	21530909	21530910	MI0009759	bta-mir-187	+	21530900	21531008	11				Udder depth	10340
rs439499306	G	G	C/G	24	21530914	21530915	MI0009759	bta-mir-187	+	21530900	21531008	16				Udder depth	10340
rs462817694	A	A	A/C	24	21530915	21530916	MI0009759	bta-mir-187	+	21530900	21531008	17				Udder depth	10340
rs482631453	A	A	A/G	24	21530917	21530918	MI0009759	bta-mir-187	+	21530900	21531008	19				Udder depth	10340
rs448029527	C	C	C/G	24	21530918	21530919	MI0009759	bta-mir-187	+	21530900	21531008	20				Udder depth	10340
rs468272005	T	T	C/G/T	24	21530921	21530922	MI0009759	bta-mir-187	+	21530900	21531008	23				Udder depth	10340
rs478545857	T	T	G/T	24	21530923	21530924	MI0009759	bta-mir-187	+	21530900	21531008	25				Udder depth	10340
rs447315911	G	G	A/G	24	21530926	21530927	MI0009759	bta-mir-187	+	21530900	21531008	28				Udder depth	10340
rs466972938	C	C	A/C	24	21530929	21530930	MI0009759	bta-mir-187	+	21530900	21531008	31				Udder depth	10340
rs432551625	G	G	C/G	24	21530933	21530934	MI0009759	bta-mir-187	+	21530900	21531008	35				Udder depth	10340
rs452733594	G	G	A/G	24	21530934	21530935	MI0009759	bta-mir-187	+	21530900	21531008	36				Udder depth	10340
rs469704217	C	C	A/C	24	21530948	21530949	MI0009759	bta-mir-187	+	21530900	21531008	50				Udder depth	10340
rs437989152	G	G	G/T	24	21530953	21530954	MI0009759	bta-mir-187	+	21530900	21531008	55				Udder depth	10340
rs454873832	C	C	C/T	24	21530959	21530960	MI0009759	bta-mir-187	+	21530900	21531008	61				Udder depth	10340
rs475087371	T	T	G/T	24	21530960	21530961	MI0009759	bta-mir-187	+	21530900	21531008	62				Udder depth	10340
rs440503018	A	A	A/T	24	21530964	21530965	MI0009759	bta-mir-187	+	21530900	21531008	66				Udder depth	10340
rs483018141	A	A	A/C	24	21530995	21530996	MI0009759	bta-mir-187	+	21530900	21531008	97				Udder depth	10340
rs441588104	C	C	C/G	24	21530996	21530997	MI0009759	bta-mir-187	+	21530900	21531008	98				Udder depth	10340
rs461676997	G	G	C/G/T	24	21530997	21530998	MI0009759	bta-mir-187	+	21530900	21531008	99				Udder depth	10340
rs478433363	C	C	A/C	24	21530998	21530999	MI0009759	bta-mir-187	+	21530900	21531008	100				Udder depth	10340
rs447254123	C	C	A/C	24	21531003	21531004	MI0009759	bta-mir-187	+	21530900	21531008	105				Udder depth	10340
rs457684794	G	G	C/G	24	21531005	21531006	MI0009759	bta-mir-187	+	21530900	21531008	107				Udder depth	10340
rs439912625	G	G	G/T	29	25208522	25208523	MI0011447	bta-mir-449d	-	25208519	25208593	71				Udder depth	4998
rs451785549	G	G	C/G	29	25208531	25208532	MI0011447	bta-mir-449d	-	25208519	25208593	62				Udder depth	4998
rs479989923	G	G	A/G	29	25208542	25208543	MI0011447	bta-mir-449d	-	25208519	25208593	51				Udder depth	4998
rs526628076	A	A	A/G	29	25208547	25208548	MI0011447	bta-mir-449d	-	25208519	25208593	46				Udder depth	4998
rs461781453	A	A	A/T	29	25208579	25208580	MI0011447	bta-mir-449d	-	25208519	25208593	14				Udder depth	4998
rs723422071	A	A	A/G	13	8642589	8642590	MI0022273	bta-mir-2285n-2	+	8642568	8642648	23				Udder depth	4636
rs518227765	G	G	A/G	13	8642590	8642591	MI0022273	bta-mir-2285n-2	+	8642568	8642648	24				Udder depth	4636
rs521673644	A	A	A/C	13	8642616	8642617	MI0022273	bta-mir-2285n-2	+	8642568	8642648	50				Udder depth	4636
rs436802469	A	A	A/G	13	8642641	8642642	MI0022273	bta-mir-2285n-2	+	8642568	8642648	75				Udder depth	4636
rs442352373	A	A	A/G	13	13129063	13129064	MI0025536	bta-mir-7861	-	13129033	13129093	30				Udder depth	4636
rs517267788	T	T	G/T	13	13129080	13129081	MI0025536	bta-mir-7861	-	13129033	13129093	13				Udder depth	4636
rs520405038	G	G	G/T	15	30727317	30727318	MI0022279	bta-mir-378b	+	30727297	30727394	22				Udder depth	1601
rs718747050	T	T	A/T	15	30727349	30727350	MI0022279	bta-mir-378b	+	30727297	30727394	54				Udder depth	1601
rs208947946	G	G	G/T	15	30727353	30727354	MI0022279	bta-mir-378b	+	30727297	30727394	58				Udder depth	1601
rs478427850	C	C	C/T	16	40485833	40485834	MI0005040	bta-mir-214	-	40485807	40485916	83	bta-miR-214	13		Udder depth	1610
rs436266404	T	T	G/T	16	40485877	40485878	MI0021116	bta-mir-3120	+	40485817	40485897	62	bta-miR-3120	10		Udder depth	1610
rs456293059	C	C	A/C	16	40485881	40485882	MI0021116	bta-mir-3120	+	40485817	40485897	66	bta-miR-3120	14		Udder depth	1610
rs432204198	A	A	A/C	16	40491636	40491637	MI0004758	bta-mir-199a-1	-	40491602	40491705	69	bta-miR-199a-3p	0		Udder depth	1610
rs432848968	G	G	A/G	20	23963051	23963052	MI0009836	bta-mir-449c	-	23962986	23963091	40	bta-miR-449c	18		Udder depth	4986
rs451366911	C	C	A/C	20	23963052	23963053	MI0009836	bta-mir-449c	-	23962986	23963091	39	bta-miR-449c	17		Udder depth	4986
rs469823500	T	T	A/T	20	23963053	23963054	MI0009836	bta-mir-449c	-	23962986	23963091	38	bta-miR-449c	16		Udder depth	4986
rs436993835	A	A	A/G	20	23963054	23963055	MI0009836	bta-mir-449c	-	23962986	23963091	37	bta-miR-449c	15		Udder depth	4986
rs455471531	G	G	A/G	20	23963055	23963056	MI0009836	bta-mir-449c	-	23962986	23963091	36	bta-miR-449c	14		Udder depth	4986
rs474149800	G	G	A/G	20	23963057	23963058	MI0009836	bta-mir-449c	-	23962986	23963091	34	bta-miR-449c	12		Udder depth	4986
rs441967455	T	T	A/T	20	23963059	23963060	MI0009836	bta-mir-449c	-	23962986	23963091	32	bta-miR-449c	10		Udder depth	4986
rs454047523	G	G	G/T	20	23963060	23963061	MI0009836	bta-mir-449c	-	23962986	23963091	31	bta-miR-449c	9		Udder depth	4986
rs483195426	A	A	A/C/T	20	23963069	23963070	MI0009836	bta-mir-449c	-	23962986	23963091	22	bta-miR-449c	0		Udder depth	4986
rs450034840	T	T	C/T	22	30220245	30220246	MI0010456	bta-mir-1284	+	30220160	30220277	87				Udder depth	4988
rs468119471	T	T	C/T	22	30220261	30220262	MI0010456	bta-mir-1284	+	30220160	30220277	103				Udder depth	4988
rs435188031	T	T	G/T	22	30220269	30220270	MI0010456	bta-mir-1284	+	30220160	30220277	111				Udder depth	4988
rs474083613	T	T	A/T	23	13082465	13082466	MI0011412	bta-mir-2377	-	13082433	13082501	36				Udder depth	10336
rs525253567	T	T	-/T	23	13082480	13082481	MI0011412	bta-mir-2377	-	13082433	13082501	21				Udder depth	10336
rs210246478	T	T	C/T	23	13082482	13082483	MI0011412	bta-mir-2377	-	13082433	13082501	19				Udder depth	10336
rs453075601	T	T	G/T	23	13082488	13082489	MI0011412	bta-mir-2377	-	13082433	13082501	13				Udder depth	10336
rs471723203	T	T	G/T	23	13082493	13082494	MI0011412	bta-mir-2377	-	13082433	13082501	8				Udder depth	10336
rs483096280	C	C	A/C	23	24308060	24308061	MI0009772	bta-mir-206	+	24308042	24308127	20				Udder depth	1638
rs519608652	C	C	C/G	23	24308121	24308122	MI0009772	bta-mir-206	+	24308042	24308127	81				Udder depth	1638
rs470279891	G	G	G/T	23	24312333	24312334	MI0009734	bta-mir-133b	+	24312330	24312413	5				Udder depth	1638
rs435393848	C	C	A/C	23	24312334	24312335	MI0009734	bta-mir-133b	+	24312330	24312413	6				Udder depth	1638
rs455367687	G	G	G/T	23	24312338	24312339	MI0009734	bta-mir-133b	+	24312330	24312413	10				Udder depth	1638
rs472156813	C	C	A/C	23	24312340	24312341	MI0009734	bta-mir-133b	+	24312330	24312413	12				Udder depth	1638
rs434655611	G	G	G/T	23	24312342	24312343	MI0009734	bta-mir-133b	+	24312330	24312413	14				Udder depth	1638
rs451460985	T	T	C/G/T	23	24312344	24312345	MI0009734	bta-mir-133b	+	24312330	24312413	16				Udder depth	1638
rs471397976	A	A	A/C	23	24312348	24312349	MI0009734	bta-mir-133b	+	24312330	24312413	20				Udder depth	1638
rs443191378	C	C	C/G	23	24312354	24312355	MI0009734	bta-mir-133b	+	24312330	24312413	26				Udder depth	1638
rs463455024	G	G	A/G	23	24312358	24312359	MI0009734	bta-mir-133b	+	24312330	24312413	30				Udder depth	1638
rs473919090	T	T	C/G/T	23	24312359	24312360	MI0009734	bta-mir-133b	+	24312330	24312413	31				Udder depth	1638
rs442293710	T	T	C/T	23	24312363	24312364	MI0009734	bta-mir-133b	+	24312330	24312413	35				Udder depth	1638
rs462349578	C	C	C/T	23	24312367	24312368	MI0009734	bta-mir-133b	+	24312330	24312413	39				Udder depth	1638
rs479168450	G	G	C/G/T	23	24312370	24312371	MI0009734	bta-mir-133b	+	24312330	24312413	42				Udder depth	1638
rs448003785	T	T	G/T	23	24312376	24312377	MI0009734	bta-mir-133b	+	24312330	24312413	48				Udder depth	1638
rs450056333	C	C	C/G	23	24312410	24312411	MI0009734	bta-mir-133b	+	24312330	24312413	82				Udder depth	1638
rs463756630	G	G	G/T	23	28202779	28202780	MI0011413	bta-mir-2378	-	28202778	28202855	76				Udder depth	1638
rs475859354	A	A	A/C	23	28202787	28202788	MI0011413	bta-mir-2378	-	28202778	28202855	68				Udder depth	1638
rs439773953	C	C	C/G	23	28202816	28202817	MI0011413	bta-mir-2378	-	28202778	28202855	39				Udder depth	1638
rs478659704	T	T	G/T	23	28202817	28202818	MI0011413	bta-mir-2378	-	28202778	28202855	38				Udder depth	1638
rs378669736	-	-	-/A	23	28202826	28202826	MI0011413	bta-mir-2378	-	28202778	28202855	29				Udder depth	1638
rs458345065	A	A	A/G	23	28202844	28202845	MI0011413	bta-mir-2378	-	28202778	28202855	11				Udder depth	1638
rs480102575	C	C	C/T	23	28202848	28202849	MI0011413	bta-mir-2378	-	28202778	28202855	7				Udder depth	1638
rs482739269	C	C	A/C	23	28203154	28203155	MI0009903	bta-mir-877	-	28203151	28203252	98				Udder depth	1638
rs449859330	A	A	A/G/T	23	28203155	28203156	MI0009903	bta-mir-877	-	28203151	28203252	97				Udder depth	1638
rs465170714	G	G	G/T	23	28203170	28203171	MI0009903	bta-mir-877	-	28203151	28203252	82				Udder depth	1638
rs477334476	A	A	A/G	23	28203171	28203172	MI0009903	bta-mir-877	-	28203151	28203252	81				Udder depth	1638
rs447593060	A	A	A/C	23	28203172	28203173	MI0009903	bta-mir-877	-	28203151	28203252	80				Udder depth	1638
rs466906500	G	G	G/T	23	28203173	28203174	MI0009903	bta-mir-877	-	28203151	28203252	79				Udder depth	1638
rs434004883	G	G	C/G	23	28203176	28203177	MI0009903	bta-mir-877	-	28203151	28203252	76				Udder depth	1638
rs455588261	A	A	A/T	23	28203181	28203182	MI0009903	bta-mir-877	-	28203151	28203252	71				Udder depth	1638
rs467676684	T	T	G/T	23	28203185	28203186	MI0009903	bta-mir-877	-	28203151	28203252	67				Udder depth	1638
rs380372406	G	G	-/G	23	28203186	28203187	MI0009903	bta-mir-877	-	28203151	28203252	66				Udder depth	1638
rs438059734	G	G	C/G	23	28203186	28203187	MI0009903	bta-mir-877	-	28203151	28203252	66				Udder depth	1638
rs456564301	G	G	C/G	23	28203189	28203190	MI0009903	bta-mir-877	-	28203151	28203252	63				Udder depth	1638
rs436358152	G	G	G/T	23	28203191	28203192	MI0009903	bta-mir-877	-	28203151	28203252	61				Udder depth	1638
rs432658377	T	T	A/C/T	23	28203192	28203193	MI0009903	bta-mir-877	-	28203151	28203252	60				Udder depth	1638
rs454446634	C	C	A/C	23	28203193	28203194	MI0009903	bta-mir-877	-	28203151	28203252	59				Udder depth	1638
rs472892259	C	C	C/G	23	28203195	28203196	MI0009903	bta-mir-877	-	28203151	28203252	57				Udder depth	1638
rs442416791	G	G	C/G	23	28203196	28203197	MI0009903	bta-mir-877	-	28203151	28203252	56				Udder depth	1638
rs517108460	-	-	-/C	23	28203198	28203198	MI0009903	bta-mir-877	-	28203151	28203252	54				Udder depth	1638
rs460948695	A	A	A/C/G	23	28203199	28203200	MI0009903	bta-mir-877	-	28203151	28203252	53				Udder depth	1638
rs476260315	G	G	C/G	23	28203200	28203201	MI0009903	bta-mir-877	-	28203151	28203252	52				Udder depth	1638
rs443382067	C	C	A/C	23	28203204	28203205	MI0009903	bta-mir-877	-	28203151	28203252	48				Udder depth	1638
rs458675084	C	C	C/T	23	28203205	28203206	MI0009903	bta-mir-877	-	28203151	28203252	47				Udder depth	1638
rs477266520	G	G	G/T	23	28203207	28203208	MI0009903	bta-mir-877	-	28203151	28203252	45				Udder depth	1638
rs447474733	T	T	A/T	23	28203211	28203212	MI0009903	bta-mir-877	-	28203151	28203252	41				Udder depth	1638
rs459611190	A	A	A/C/G	23	28203212	28203213	MI0009903	bta-mir-877	-	28203151	28203252	40				Udder depth	1638
rs481142423	G	G	C/G	23	28203213	28203214	MI0009903	bta-mir-877	-	28203151	28203252	39				Udder depth	1638
rs456544875	T	T	C/T	23	28203218	28203219	MI0009903	bta-mir-877	-	28203151	28203252	34				Udder depth	1638
rs467645970	G	G	A/C/G	23	28203219	28203220	MI0009903	bta-mir-877	-	28203151	28203252	33				Udder depth	1638
rs438053716	T	T	C/G/T	23	28203220	28203221	MI0009903	bta-mir-877	-	28203151	28203252	32				Udder depth	1638
rs470686572	T	T	C/T	23	28203243	28203244	MI0009903	bta-mir-877	-	28203151	28203252	9				Udder depth	1638
rs440962546	T	T	C/G/T	23	28203244	28203245	MI0009903	bta-mir-877	-	28203151	28203252	8				Udder depth	1638
rs459481964	T	T	C/T	23	28203246	28203247	MI0009903	bta-mir-877	-	28203151	28203252	6				Udder depth	1638
rs481079142	C	C	C/G	23	28203247	28203248	MI0009903	bta-mir-877	-	28203151	28203252	5				Udder depth	1638
rs448339411	A	A	A/C	23	28203249	28203250	MI0009903	bta-mir-877	-	28203151	28203252	3				Udder depth	1638
rs461160467	G	G	G/T	23	28203250	28203251	MI0009903	bta-mir-877	-	28203151	28203252	2				Udder depth	1638
rs452811088	C	C	A/C	23	30788204	30788205	MI0011414	bta-mir-2379	-	30788153	30788230	26				Udder depth	1638
rs478944063	T	T	A/T	23	30788207	30788208	MI0011414	bta-mir-2379	-	30788153	30788230	23				Udder depth	1638
rs442625533	C	C	A/C	23	30788216	30788217	MI0011414	bta-mir-2379	-	30788153	30788230	14				Udder depth	1638
rs461169434	T	T	C/T	23	30788218	30788219	MI0011414	bta-mir-2379	-	30788153	30788230	12				Udder depth	1638
rs471625793	C	C	C/T	23	30890132	30890133	MI0025527	bta-mir-7857	+	30890110	30890175	24				Udder depth	1638
rs378504464	A	A	A/C	23	30890140	30890141	MI0025527	bta-mir-7857	+	30890110	30890175	32				Udder depth	1638
rs380606899	T	T	C/T	23	30890166	30890167	MI0025527	bta-mir-7857	+	30890110	30890175	58				Udder depth	1638
rs463488652	T	T	A/T	23	31589157	31589158	MI0022331	bta-mir-6531	-	31589157	31589240	83				Udder depth	1638
rs800040872	T	T	G/T	23	31589164	31589165	MI0022331	bta-mir-6531	-	31589157	31589240	76				Udder depth	1638
rs209543615	A	A	A/G	23	31589167	31589168	MI0022331	bta-mir-6531	-	31589157	31589240	73				Udder depth	1638
rs439251409	T	T	A/T	23	31589179	31589180	MI0022331	bta-mir-6531	-	31589157	31589240	61				Udder depth	1638
rs457711912	T	T	A/T	23	31589181	31589182	MI0022331	bta-mir-6531	-	31589157	31589240	59				Udder depth	1638
rs477772090	A	A	A/C	23	31589186	31589187	MI0022331	bta-mir-6531	-	31589157	31589240	54				Udder depth	1638
rs383843074	G	G	A/G	23	31589188	31589189	MI0022331	bta-mir-6531	-	31589157	31589240	52				Udder depth	1638
rs381341999	A	A	A/G	23	31589190	31589191	MI0022331	bta-mir-6531	-	31589157	31589240	50				Udder depth	1638
rs469674557	G	G	A/G	23	31589191	31589192	MI0022331	bta-mir-6531	-	31589157	31589240	49				Udder depth	1638
rs517062177	-	-	-/A	23	31589193	31589193	MI0022331	bta-mir-6531	-	31589157	31589240	47				Udder depth	1638
rs721376238	A	A	A/C	23	31589200	31589201	MI0022331	bta-mir-6531	-	31589157	31589240	40				Udder depth	1638
rs448591680	C	C	A/C	23	31589202	31589203	MI0022331	bta-mir-6531	-	31589157	31589240	38				Udder depth	1638
rs470138520	A	A	A/G	23	31589203	31589204	MI0022331	bta-mir-6531	-	31589157	31589240	37				Udder depth	1638
rs482110261	C	C	A/C	23	31589204	31589205	MI0022331	bta-mir-6531	-	31589157	31589240	36				Udder depth	1638
rs378027576	T	T	A/T	23	31589205	31589206	MI0022331	bta-mir-6531	-	31589157	31589240	35				Udder depth	1638
rs436783540	T	T	C/T	23	31589207	31589208	MI0022331	bta-mir-6531	-	31589157	31589240	33				Udder depth	1638
rs525942531	T	T	C/T	23	35647144	35647145	MI0011415	bta-mir-2284c	+	35647120	35647199	26	bta-miR-2284c	12		Udder depth	4990
rs460778281	G	G	G/T	23	35647145	35647146	MI0011415	bta-mir-2284c	+	35647120	35647199	27	bta-miR-2284c	13		Udder depth	4990
rs470736635	T	T	C/T	24	21530979	21530980	MI0009759	bta-mir-187	+	21530900	21531008	81	bta-miR-187	9		Udder depth	10340
rs439397842	C	C	A/C	24	21530987	21530988	MI0009759	bta-mir-187	+	21530900	21531008	89	bta-miR-187	17		Udder depth	10340
rs462849400	A	A	A/G	24	21530991	21530992	MI0009759	bta-mir-187	+	21530900	21531008	93	bta-miR-187	21		Udder depth	10340
rs443435127	A	A	A/C	5	41964068	41964069	MI0011478	bta-mir-2428	+	41964062	41964126	8				Udder depth	4624
rs442660551	A	A	A/G	5	41964091	41964092	MI0011478	bta-mir-2428	+	41964062	41964126	31				Udder depth	4624
rs720384966	G	G	A/G	5	41964115	41964116	MI0011478	bta-mir-2428	+	41964062	41964126	55				Udder depth	4624
rs465605036	C	C	A/C	5	43233886	43233887	MI0022338	bta-mir-2284z-5	+	43233811	43233890	77				Udder depth	4624
rs521529657	A	A	A/G	5	43233888	43233889	MI0022338	bta-mir-2284z-5	+	43233811	43233890	79				Udder depth	4624
rs479056264	C	C	C/T	5	48164008	48164009	MI0009896	bta-mir-763	-	48164007	48164126	118				Udder depth	4624
rs447563583	T	T	G/T	5	48164013	48164014	MI0009896	bta-mir-763	-	48164007	48164126	113				Udder depth	4624
rs464494391	A	A	A/G/T	5	48164019	48164020	MI0009896	bta-mir-763	-	48164007	48164126	107				Udder depth	4624
rs478170890	C	C	C/T	5	48164024	48164025	MI0009896	bta-mir-763	-	48164007	48164126	102				Udder depth	4624
rs449839776	T	T	G/T	5	48164027	48164028	MI0009896	bta-mir-763	-	48164007	48164126	99				Udder depth	4624
rs469972171	C	C	C/G	5	48164030	48164031	MI0009896	bta-mir-763	-	48164007	48164126	96				Udder depth	4624
rs435234738	G	G	G/T	5	48164033	48164034	MI0009896	bta-mir-763	-	48164007	48164126	93				Udder depth	4624
rs455314475	C	C	A/C	5	48164044	48164045	MI0009896	bta-mir-763	-	48164007	48164126	82				Udder depth	4624
rs465575290	T	T	G/T	5	48164045	48164046	MI0009896	bta-mir-763	-	48164007	48164126	81				Udder depth	4624
rs519439402	-	-	-/G	5	48164046	48164046	MI0009896	bta-mir-763	-	48164007	48164126	80				Udder depth	4624
rs434381219	C	C	C/G	5	48164048	48164049	MI0009896	bta-mir-763	-	48164007	48164126	78				Udder depth	4624
rs456531022	T	T	G/T	5	48164049	48164050	MI0009896	bta-mir-763	-	48164007	48164126	77				Udder depth	4624
rs471274482	G	G	G/T	5	48164050	48164051	MI0009896	bta-mir-763	-	48164007	48164126	76				Udder depth	4624
rs439893358	A	A	A/G	5	48164053	48164054	MI0009896	bta-mir-763	-	48164007	48164126	73				Udder depth	4624
rs456674708	G	G	C/G	5	48164055	48164056	MI0009896	bta-mir-763	-	48164007	48164126	71				Udder depth	4624
rs476876664	C	C	A/C/G	5	48164056	48164057	MI0009896	bta-mir-763	-	48164007	48164126	70				Udder depth	4624
rs442101578	A	A	A/G	5	48164057	48164058	MI0009896	bta-mir-763	-	48164007	48164126	69				Udder depth	4624
rs462273744	A	A	A/G	5	48164059	48164060	MI0009896	bta-mir-763	-	48164007	48164126	67				Udder depth	4624
rs522982446	-	-	-/G	5	48164060	48164060	MI0009896	bta-mir-763	-	48164007	48164126	66				Udder depth	4624
rs478993062	C	C	C/G	5	48164061	48164062	MI0009896	bta-mir-763	-	48164007	48164126	65				Udder depth	4624
rs526519233	-	-	-/A	5	48164063	48164063	MI0009896	bta-mir-763	-	48164007	48164126	63				Udder depth	4624
rs441210119	A	A	A/C	5	48164063	48164064	MI0009896	bta-mir-763	-	48164007	48164126	63				Udder depth	4624
rs458155324	A	A	A/C	5	48164064	48164065	MI0009896	bta-mir-763	-	48164007	48164126	62				Udder depth	4624
rs518910265	-	-	-/G	5	48164065	48164065	MI0009896	bta-mir-763	-	48164007	48164126	61				Udder depth	4624
rs478101588	G	G	A/C/G	5	48164066	48164067	MI0009896	bta-mir-763	-	48164007	48164126	60				Udder depth	4624
rs458092160	T	T	C/T	5	48164092	48164093	MI0009896	bta-mir-763	-	48164007	48164126	34				Udder depth	4624
rs471813574	A	A	A/T	5	48164094	48164095	MI0009896	bta-mir-763	-	48164007	48164126	32				Udder depth	4624
rs443511385	A	A	A/G	5	48164095	48164096	MI0009896	bta-mir-763	-	48164007	48164126	31				Udder depth	4624
rs463653384	C	C	C/T	5	48164097	48164098	MI0009896	bta-mir-763	-	48164007	48164126	29				Udder depth	4624
rs480564422	A	A	A/C/T	5	48164101	48164102	MI0009896	bta-mir-763	-	48164007	48164126	25				Udder depth	4624
rs448967171	C	C	C/G	5	48164110	48164111	MI0009896	bta-mir-763	-	48164007	48164126	16				Udder depth	4624
rs459385450	C	C	A/C	5	48164115	48164116	MI0009896	bta-mir-763	-	48164007	48164126	11				Udder depth	4624
rs464580197	C	C	A/C	5	48952342	48952343	MI0011479	bta-mir-2429	-	48952298	48952372	30				Udder depth	4624
rs433140538	T	T	A/T	5	48952367	48952368	MI0011479	bta-mir-2429	-	48952298	48952372	5				Udder depth	4624
rs459775330	C	C	C/T	5	51209100	51209101	MI0005065	bta-let-7i	-	51209081	51209164	64				Udder depth	4624
rs481685896	C	C	C/G	5	51209112	51209113	MI0005065	bta-let-7i	-	51209081	51209164	52				Udder depth	4624
rs448558111	C	C	C/T	5	51209127	51209128	MI0005065	bta-let-7i	-	51209081	51209164	37				Udder depth	4624
rs463898326	C	C	C/G	5	51209131	51209132	MI0005065	bta-let-7i	-	51209081	51209164	33				Udder depth	4624
rs482363576	A	A	A/C	5	51209134	51209135	MI0005065	bta-let-7i	-	51209081	51209164	30				Udder depth	4624
rs109790808	A	A	A/G	5	56293173	56293174	MI0011480	bta-mir-2430	-	56293171	56293243	70				Udder depth	4624
rs469690151	A	A	A/T	5	56293194	56293195	MI0011480	bta-mir-2430	-	56293171	56293243	49				Udder depth	4624
rs473405513	T	T	C/T	5	56293237	56293238	MI0011480	bta-mir-2430	-	56293171	56293243	6				Udder depth	4624
rs208279052	A	A	A/G	5	56655725	56655726	MI0011481	bta-mir-2431	-	56655700	56655767	42				Udder depth	4624
rs109256956	C	C	C/T	5	56655729	56655730	MI0011481	bta-mir-2431	-	56655700	56655767	38				Udder depth	4624
rs476865546	G	G	A/G	5	57337627	57337628	MI0011483	bta-mir-2432	-	57337563	57337633	6				Udder depth	4624
rs447322344	A	A	A/G	5	57337630	57337631	MI0011483	bta-mir-2432	-	57337563	57337633	3				Udder depth	4624
rs472362107	T	T	C/T	5	57337631	57337632	MI0011483	bta-mir-2432	-	57337563	57337633	2				Udder depth	4624
rs476453427	G	G	G/T	5	57400217	57400218	MI0011484	bta-mir-2433	-	57400205	57400281	64				Udder depth	4624
rs443448382	G	G	C/G	5	57400231	57400232	MI0011484	bta-mir-2433	-	57400205	57400281	50				Udder depth	4624
rs458695980	T	T	G/T	5	57400233	57400234	MI0011484	bta-mir-2433	-	57400205	57400281	48				Udder depth	4624
rs471585351	T	T	C/T	5	57400241	57400242	MI0011484	bta-mir-2433	-	57400205	57400281	40				Udder depth	4624
rs438792692	A	A	A/C	5	57400246	57400247	MI0011484	bta-mir-2433	-	57400205	57400281	35				Udder depth	4624
rs447085663	C	C	A/C	16	40485839	40485840	MI0005040	bta-mir-214	-	40485807	40485916	77	bta-miR-214	7	inseed	Udder depth	1610
rs460787718	T	T	G/T	16	40485845	40485846	MI0005040	bta-mir-214	-	40485807	40485916	71	bta-miR-214	1	inseed	Udder depth	1610
rs467547209	A	A	A/C	16	40485869	40485870	MI0021116	bta-mir-3120	+	40485817	40485897	54	bta-miR-3120	2	inseed	Udder depth	1610
rs481017645	A	A	A/C	16	40491631	40491632	MI0004758	bta-mir-199a-1	-	40491602	40491705	74	bta-miR-199a-3p	5	inseed	Udder depth	1610
rs449833354	T	T	G/T	16	40491633	40491634	MI0004758	bta-mir-199a-1	-	40491602	40491705	72	bta-miR-199a-3p	3	inseed	Udder depth	1610
rs469817377	G	G	A/G	16	40491634	40491635	MI0004758	bta-mir-199a-1	-	40491602	40491705	71	bta-miR-199a-3p	2	inseed	Udder depth	1610
rs472706276	A	A	A/C	20	23963062	23963063	MI0009836	bta-mir-449c	-	23962986	23963091	29	bta-miR-449c	7	inseed	Udder depth	4986
rs439749670	T	T	C/T	20	23963064	23963065	MI0009836	bta-mir-449c	-	23962986	23963091	27	bta-miR-449c	5	inseed	Udder depth	4986
rs458268566	G	G	G/T	20	23963065	23963066	MI0009836	bta-mir-449c	-	23962986	23963091	26	bta-miR-449c	4	inseed	Udder depth	4986
rs379172826	G	G	G/T	20	23967290	23967291	MI0009835	bta-mir-449b	+	23967269	23967366	23	bta-miR-449b	6	inseed	Udder depth	4986
rs382556595	T	T	A/T	20	23967291	23967292	MI0009835	bta-mir-449b	+	23967269	23967366	24	bta-miR-449b	7	inseed	Udder depth	4986
rs797347898	A	A	A/G	23	32381698	32381699	MI0025541	bta-mir-2285ad	+	32381660	32381717	40	bta-miR-2285ad	2	inseed	Udder depth	4990
rs454242771	T	T	G/T	24	21530976	21530977	MI0009759	bta-mir-187	+	21530900	21531008	78	bta-miR-187	6	inseed	Udder depth	10340
rs440608966	A	A	A/G	29	25208571	25208572	MI0011447	bta-mir-449d	-	25208519	25208593	22	bta-miR-449d	7	inseed	Udder depth	4998
rs472235104	A	A	A/T	13	13129038	13129039	MI0025536	bta-mir-7861	-	13129033	13129093	55	bta-miR-7861	17		Udder depth	4636
rs475041311	T	T	G/T	13	58091726	58091727	MI0021141	bta-mir-6123	+	58091678	58091759	50				Udder depth	1588
rs442062059	T	T	C/T	13	58091740	58091741	MI0021141	bta-mir-6123	+	58091678	58091759	64				Udder depth	1588
rs463888878	G	G	G/T	13	58091748	58091749	MI0021141	bta-mir-6123	+	58091678	58091759	72				Udder depth	1588
rs478632055	A	A	A/T	13	58091757	58091758	MI0021141	bta-mir-6123	+	58091678	58091759	81				Udder depth	1588
rs455531490	A	A	A/T	13	58091938	58091939	MI0009786	bta-mir-296	+	58091936	58092013	4				Udder depth	1588
rs439695944	G	G	A/G	13	58092007	58092008	MI0009786	bta-mir-296	+	58091936	58092013	73				Udder depth	1588
rs465123679	G	G	A/G	13	59489979	59489980	MI0011320	bta-mir-2307	+	59489950	59490018	31				Udder depth	1588
rs450084019	C	C	A/C	18	24992700	24992701	MI0005029	bta-mir-138-2	+	24992697	24992779	5				Udder depth	1616
rs468617460	G	G	C/G	18	24992702	24992703	MI0005029	bta-mir-138-2	+	24992697	24992779	7				Udder depth	1616
rs433386385	A	A	A/C	18	24992730	24992731	MI0005029	bta-mir-138-2	+	24992697	24992779	35				Udder depth	1616
rs451914028	C	C	C/G	18	24992732	24992733	MI0005029	bta-mir-138-2	+	24992697	24992779	37				Udder depth	1616
rs520661050	-	-	-/AA	18	24992733	24992733	MI0005029	bta-mir-138-2	+	24992697	24992779	37				Udder depth	1616
rs525598757	-	-	-/A	18	24992737	24992737	MI0005029	bta-mir-138-2	+	24992697	24992779	41				Udder depth	1616
rs470451202	A	A	A/C	18	24992738	24992739	MI0005029	bta-mir-138-2	+	24992697	24992779	43				Udder depth	1616
rs437501247	A	A	A/C	18	24992746	24992747	MI0005029	bta-mir-138-2	+	24992697	24992779	51				Udder depth	1616
rs455161708	T	T	C/T	18	24992757	24992758	MI0005029	bta-mir-138-2	+	24992697	24992779	62				Udder depth	1616
rs524829560	C	C	C/T	18	24992760	24992761	MI0005029	bta-mir-138-2	+	24992697	24992779	65				Udder depth	1616
rs473609227	G	G	G/T	18	24992768	24992769	MI0005029	bta-mir-138-2	+	24992697	24992779	73				Udder depth	1616
rs380764141	A	A	A/G	18	25103681	25103682	MI0021130	bta-mir-2285g-1	+	25103670	25103730	13				Udder depth	1616
rs382891649	C	C	C/T	18	25103693	25103694	MI0021130	bta-mir-2285g-1	+	25103670	25103730	25				Udder depth	1616
rs714402541	C	C	C/T	18	25148157	25148158	MI0022284	bta-mir-2285n-3	+	25148117	25148192	42				Udder depth	1616
rs518170579	A	A	A/G	18	26729690	26729691	MI0022285	bta-mir-2285n-4	-	26729655	26729740	50				Udder depth	1616
rs455698347	G	G	G/T	23	13082440	13082441	MI0011412	bta-mir-2377	-	13082433	13082501	61	bta-miR-2377	17		Udder depth	10336
rs437008491	G	G	A/G	23	24308104	24308105	MI0009772	bta-mir-206	+	24308042	24308127	64	bta-miR-206	10		Udder depth	1638
rs450125344	T	T	G/T	23	28203225	28203226	MI0009903	bta-mir-877	-	28203151	28203252	27	bta-miR-877	17		Udder depth	1638
rs520750012	-	-	-/G	23	28203226	28203226	MI0009903	bta-mir-877	-	28203151	28203252	26	bta-miR-877	16		Udder depth	1638
rs714132458	C	C	C/T	23	28203227	28203228	MI0009903	bta-mir-877	-	28203151	28203252	25	bta-miR-877	15		Udder depth	1638
rs465508980	G	G	C/G/T	23	28203228	28203229	MI0009903	bta-mir-877	-	28203151	28203252	24	bta-miR-877	14		Udder depth	1638
rs432526839	C	C	C/T	23	28203230	28203231	MI0009903	bta-mir-877	-	28203151	28203252	22	bta-miR-877	12		Udder depth	1638
rs454268600	A	A	A/C/T	23	28203231	28203232	MI0009903	bta-mir-877	-	28203151	28203252	21	bta-miR-877	11		Udder depth	1638
rs472892660	T	T	A/C/T	23	28203232	28203233	MI0009903	bta-mir-877	-	28203151	28203252	20	bta-miR-877	10		Udder depth	1638
rs460449726	C	C	C/T	23	30788173	30788174	MI0011414	bta-mir-2379	-	30788153	30788230	57	bta-miR-2379	10		Udder depth	1638
rs434683718	A	A	A/C	23	31589218	31589219	MI0022331	bta-mir-6531	-	31589157	31589240	22	bta-miR-6531	12		Udder depth	1638
rs453143868	A	A	A/G	23	31589220	31589221	MI0022331	bta-mir-6531	-	31589157	31589240	20	bta-miR-6531	10		Udder depth	1638
rs453301610	A	A	A/G	4	49304453	49304454	MI0011464	bta-mir-2418	-	49304452	49304527	74				Udder depth	4972
rs797735685	C	C	C/T	4	49304463	49304464	MI0011464	bta-mir-2418	-	49304452	49304527	64				Udder depth	4972
rs475060247	A	A	A/G	4	49304467	49304468	MI0011464	bta-mir-2418	-	49304452	49304527	60				Udder depth	4972
rs442077610	G	G	C/G	4	49304468	49304469	MI0011464	bta-mir-2418	-	49304452	49304527	59				Udder depth	4972
rs460970423	C	C	C/G	4	49304475	49304476	MI0011464	bta-mir-2418	-	49304452	49304527	52				Udder depth	4972
rs473168171	A	A	A/T	4	50323246	50323247	MI0011463	bta-mir-2417	-	50323245	50323319	73				Udder depth	4972
rs433898595	A	A	A/C	4	50323247	50323248	MI0011463	bta-mir-2417	-	50323245	50323319	72				Udder depth	4972
rs109241061	T	T	G/T	4	50323253	50323254	MI0011463	bta-mir-2417	-	50323245	50323319	66				Udder depth	4972
rs473862646	A	A	A/T	4	50323258	50323259	MI0011463	bta-mir-2417	-	50323245	50323319	61				Udder depth	4972
rs109043630	A	A	A/G	4	50323265	50323266	MI0011463	bta-mir-2417	-	50323245	50323319	54				Udder depth	4972
rs455972120	A	A	A/C	4	50323268	50323269	MI0011463	bta-mir-2417	-	50323245	50323319	51				Udder depth	4972
rs471545043	T	T	G/T	4	50323272	50323273	MI0011463	bta-mir-2417	-	50323245	50323319	47				Udder depth	4972
rs438466110	A	A	A/T	4	50323274	50323275	MI0011463	bta-mir-2417	-	50323245	50323319	45				Udder depth	4972
rs110656452	C	C	C/T	4	50323280	50323281	MI0011463	bta-mir-2417	-	50323245	50323319	39				Udder depth	4972
rs479270572	A	A	A/C	4	50323290	50323291	MI0011463	bta-mir-2417	-	50323245	50323319	29				Udder depth	4972
rs457205378	G	G	A/G	5	41964070	41964071	MI0011478	bta-mir-2428	+	41964062	41964126	10	bta-miR-2428	0		Udder depth	4624
rs474103601	T	T	G/T	5	41964089	41964090	MI0011478	bta-mir-2428	+	41964062	41964126	29	bta-miR-2428	19		Udder depth	4624
rs449913849	C	C	C/G	5	48164068	48164069	MI0009896	bta-mir-763	-	48164007	48164126	58	bta-miR-763	21		Udder depth	4624
rs523881739	-	-	-/A	5	48164069	48164069	MI0009896	bta-mir-763	-	48164007	48164126	57	bta-miR-763	20		Udder depth	4624
rs463555809	C	C	C/G	5	48164069	48164070	MI0009896	bta-mir-763	-	48164007	48164126	57	bta-miR-763	20		Udder depth	4624
rs480501603	A	A	A/C/G	5	48164070	48164071	MI0009896	bta-mir-763	-	48164007	48164126	56	bta-miR-763	19		Udder depth	4624
rs448880745	T	T	C/G/T	5	48164072	48164073	MI0009896	bta-mir-763	-	48164007	48164126	54	bta-miR-763	17		Udder depth	4624
rs515978086	-	-	-/TC	5	48164075	48164075	MI0009896	bta-mir-763	-	48164007	48164126	51	bta-miR-763	14		Udder depth	4624
rs465663072	T	T	G/T	5	48164075	48164076	MI0009896	bta-mir-763	-	48164007	48164126	51	bta-miR-763	14		Udder depth	4624
rs434468931	T	T	G/T	5	48164076	48164077	MI0009896	bta-mir-763	-	48164007	48164126	50	bta-miR-763	13		Udder depth	4624
rs444751174	C	C	C/T	5	48164077	48164078	MI0009896	bta-mir-763	-	48164007	48164126	49	bta-miR-763	12		Udder depth	4624
rs464932592	T	T	C/T	5	48164079	48164080	MI0009896	bta-mir-763	-	48164007	48164126	47	bta-miR-763	10		Udder depth	4624
rs441345866	T	T	G/T	5	48164089	48164090	MI0009896	bta-mir-763	-	48164007	48164126	37	bta-miR-763	0		Udder depth	4624
rs434076047	A	A	A/G	5	48952317	48952318	MI0011479	bta-mir-2429	-	48952298	48952372	55	bta-miR-2429	10		Udder depth	4624
rs446297956	A	A	A/G	5	51209138	51209139	MI0005065	bta-let-7i	-	51209081	51209164	26	bta-let-7i	21		Udder depth	4624
rs464823041	A	A	A/G	5	51209146	51209147	MI0005065	bta-let-7i	-	51209081	51209164	18	bta-let-7i	13		Udder depth	4624
rs431941760	A	A	A/C	5	51209147	51209148	MI0005065	bta-let-7i	-	51209081	51209164	17	bta-let-7i	12		Udder depth	4624
rs447350328	C	C	A/C	5	51209148	51209149	MI0005065	bta-let-7i	-	51209081	51209164	16	bta-let-7i	11		Udder depth	4624
rs465795553	T	T	A/T	5	51209149	51209150	MI0005065	bta-let-7i	-	51209081	51209164	15	bta-let-7i	10		Udder depth	4624
rs476396991	G	G	G/T	5	51209159	51209160	MI0005065	bta-let-7i	-	51209081	51209164	5	bta-let-7i	0		Udder depth	4624
rs433467712	A	A	A/C	5	56293219	56293220	MI0011480	bta-mir-2430	-	56293171	56293243	24	bta-miR-2430	17		Udder depth	4624
rs797625027	C	C	C/T	5	57121907	57121908	MI0011482	bta-mir-677	+	57121853	57121918	56				Udder depth	4624
rs449639507	T	T	G/T	5	57337569	57337570	MI0011483	bta-mir-2432	-	57337563	57337633	64	bta-miR-2432	19		Udder depth	4624
rs458465489	A	A	A/T	5	57337572	57337573	MI0011483	bta-mir-2432	-	57337563	57337633	61	bta-miR-2432	16		Udder depth	4624
rs460469400	G	G	A/G	5	57400262	57400263	MI0011484	bta-mir-2433	-	57400205	57400281	19	bta-miR-2433	9		Udder depth	4624
rs518092330	-	-	-/A	9	25474387	25474387	MI0011538	bta-mir-2284o	+	25474384	25474444	4				Udder depth	1688
rs797709878	A	A	A/G	9	25474408	25474409	MI0011538	bta-mir-2284o	+	25474384	25474444	26				Udder depth	1688
rs526979518	T	T	C/T	9	25474409	25474410	MI0011538	bta-mir-2284o	+	25474384	25474444	27				Udder depth	1688
rs207677665	C	C	C/T	9	25474429	25474430	MI0011538	bta-mir-2284o	+	25474384	25474444	47				Udder depth	1688
rs462639155	G	G	G/T	9	25474440	25474441	MI0011538	bta-mir-2284o	+	25474384	25474444	58				Udder depth	1688
rs483291463	A	A	A/T	9	25474443	25474444	MI0011538	bta-mir-2284o	+	25474384	25474444	61				Udder depth	1688
rs720984795	G	G	A/G	9	26303378	26303379	MI0011539	bta-mir-2477	+	26303342	26303413	38				Udder depth	1688
rs459589006	T	T	G/T	23	24308098	24308099	MI0009772	bta-mir-206	+	24308042	24308127	58	bta-miR-206	4	inseed	Udder depth	1638
rs479577983	G	G	A/G	23	24308099	24308100	MI0009772	bta-mir-206	+	24308042	24308127	59	bta-miR-206	5	inseed	Udder depth	1638
rs445319179	A	A	A/C	23	24308101	24308102	MI0009772	bta-mir-206	+	24308042	24308127	61	bta-miR-206	7	inseed	Udder depth	1638
rs465270567	A	A	A/G	23	24308102	24308103	MI0009772	bta-mir-206	+	24308042	24308127	62	bta-miR-206	8	inseed	Udder depth	1638
rs458424573	G	G	G/T	23	24312379	24312380	MI0009734	bta-mir-133b	+	24312330	24312413	51	bta-miR-133b	2	inseed	Udder depth	1638
rs478284703	T	T	C/T	23	24312381	24312382	MI0009734	bta-mir-133b	+	24312330	24312413	53	bta-miR-133b	4	inseed	Udder depth	1638
rs436700829	T	T	C/T	23	28203234	28203235	MI0009903	bta-mir-877	-	28203151	28203252	18	bta-miR-877	8	inseed	Udder depth	1638
rs454510623	C	C	C/G	23	28203236	28203237	MI0009903	bta-mir-877	-	28203151	28203252	16	bta-miR-877	6	inseed	Udder depth	1638
rs476247953	T	T	C/T	23	28203237	28203238	MI0009903	bta-mir-877	-	28203151	28203252	15	bta-miR-877	5	inseed	Udder depth	1638
rs443320667	T	T	C/T	23	28203239	28203240	MI0009903	bta-mir-877	-	28203151	28203252	13	bta-miR-877	3	inseed	Udder depth	1638
rs458682455	A	A	A/C/G	23	28203240	28203241	MI0009903	bta-mir-877	-	28203151	28203252	12	bta-miR-877	2	inseed	Udder depth	1638
rs520739577	-	-	-/TC	23	31589226	31589226	MI0022331	bta-mir-6531	-	31589157	31589240	14	bta-miR-6531	4	inseed	Udder depth	1638
rs468438074	T	T	C/T	23	31589226	31589227	MI0022331	bta-mir-6531	-	31589157	31589240	14	bta-miR-6531	4	inseed	Udder depth	1638
rs433455703	A	A	A/C/G	5	48164083	48164084	MI0009896	bta-mir-763	-	48164007	48164126	43	bta-miR-763	6	inseed	Udder depth	4624
rs456821331	G	G	C/G	5	48164084	48164085	MI0009896	bta-mir-763	-	48164007	48164126	42	bta-miR-763	5	inseed	Udder depth	4624
rs476820905	C	C	C/G	5	48164085	48164086	MI0009896	bta-mir-763	-	48164007	48164126	41	bta-miR-763	4	inseed	Udder depth	4624
rs435813492	T	T	C/T	5	48164086	48164087	MI0009896	bta-mir-763	-	48164007	48164126	40	bta-miR-763	3	inseed	Udder depth	4624
rs455946744	G	G	C/G/T	5	48164087	48164088	MI0009896	bta-mir-763	-	48164007	48164126	39	bta-miR-763	2	inseed	Udder depth	4624
rs472659759	G	G	C/G	5	48164088	48164089	MI0009896	bta-mir-763	-	48164007	48164126	38	bta-miR-763	1	inseed	Udder depth	4624
rs454177120	T	T	G/T	5	48952323	48952324	MI0011479	bta-mir-2429	-	48952298	48952372	49	bta-miR-2429	4	inseed	Udder depth	4624
rs436195111	A	A	A/C	5	51209153	51209154	MI0005065	bta-let-7i	-	51209081	51209164	11	bta-let-7i	6	inseed	Udder depth	4624
rs454683892	T	T	G/T	5	51209156	51209157	MI0005065	bta-let-7i	-	51209081	51209164	8	bta-let-7i	3	inseed	Udder depth	4624
rs451767588	A	A	A/T	5	56293229	56293230	MI0011480	bta-mir-2430	-	56293171	56293243	14	bta-miR-2430	7	inseed	Udder depth	4624
rs519914243	T	T	-/T	5	56655758	56655759	MI0011481	bta-mir-2431	-	56655700	56655767	9	bta-miR-2431-5p	7	inseed	Udder depth	4624
rs476284669	C	C	C/T	5	56655761	56655762	MI0011481	bta-mir-2431	-	56655700	56655767	6	bta-miR-2431-5p	4	inseed	Udder depth	4624
rs443267249	T	T	G/T	5	56655763	56655764	MI0011481	bta-mir-2431	-	56655700	56655767	4	bta-miR-2431-5p	2	inseed	Udder depth	4624
rs517405627	G	G	A/G	5	57400264	57400265	MI0011484	bta-mir-2433	-	57400205	57400281	17	bta-miR-2433	7	inseed	Udder depth	4624
rs432326926	A	A	A/C	13	55227294	55227295	MI0025193	bta-mir-133c	+	55227289	55227382	7				Udder depth	1588
rs432326926	A	A	A/C	13	55227294	55227295	MI0009733	bta-mir-133a-1	-	55227292	55227386	92				Udder depth	1588
rs454296478	A	A	A/T	13	55227295	55227296	MI0025193	bta-mir-133c	+	55227289	55227382	8				Udder depth	1588
rs454296478	A	A	A/T	13	55227295	55227296	MI0009733	bta-mir-133a-1	-	55227292	55227386	91				Udder depth	1588
rs472904666	G	G	C/G	13	55227302	55227303	MI0025193	bta-mir-133c	+	55227289	55227382	15				Udder depth	1588
rs472904666	G	G	C/G	13	55227302	55227303	MI0009733	bta-mir-133a-1	-	55227292	55227386	84				Udder depth	1588
rs436591897	C	C	C/G	13	55227303	55227304	MI0025193	bta-mir-133c	+	55227289	55227382	16				Udder depth	1588
rs436591897	C	C	C/G	13	55227303	55227304	MI0009733	bta-mir-133a-1	-	55227292	55227386	83				Udder depth	1588
rs455074531	T	T	A/T	13	55227304	55227305	MI0025193	bta-mir-133c	+	55227289	55227382	17				Udder depth	1588
rs455074531	T	T	A/T	13	55227304	55227305	MI0009733	bta-mir-133a-1	-	55227292	55227386	82				Udder depth	1588
rs476836013	A	A	A/T	13	55227338	55227339	MI0025193	bta-mir-133c	+	55227289	55227382	51				Udder depth	1588
rs476836013	A	A	A/T	13	55227338	55227339	MI0009733	bta-mir-133a-1	-	55227292	55227386	48				Udder depth	1588
rs444186133	A	A	A/C	13	55227343	55227344	MI0025193	bta-mir-133c	+	55227289	55227382	56				Udder depth	1588
rs444186133	A	A	A/C	13	55227343	55227344	MI0009733	bta-mir-133a-1	-	55227292	55227386	43				Udder depth	1588
rs462631789	C	C	C/T	13	55227360	55227361	MI0009733	bta-mir-133a-1	-	55227292	55227386	26				Udder depth	1588
rs471421318	G	G	G/T	13	55227362	55227363	MI0009733	bta-mir-133a-1	-	55227292	55227386	24				Udder depth	1588
rs438391142	C	C	C/G	13	55227382	55227383	MI0025193	bta-mir-133c	+	55227289	55227382	95				Udder depth	1588
rs438391142	C	C	C/G	13	55227382	55227383	MI0009733	bta-mir-133a-1	-	55227292	55227386	4				Udder depth	1588
rs467730336	A	A	A/G	13	58091948	58091949	MI0009786	bta-mir-296	+	58091936	58092013	14	bta-miR-296-5p	0		Udder depth	1588
rs457285484	C	C	C/T	13	58091963	58091964	MI0009786	bta-mir-296	+	58091936	58092013	29	bta-miR-296-5p	15		Udder depth	1588
rs445327585	A	A	A/C	13	59490005	59490006	MI0011320	bta-mir-2307	+	59489950	59490018	57	bta-miR-2307	10		Udder depth	1588
rs480706266	T	T	A/T	18	24992715	24992716	MI0005029	bta-mir-138-2	+	24992697	24992779	20	bta-miR-138	10		Udder depth	1616
rs447699699	G	G	A/G	18	24992723	24992724	MI0005029	bta-mir-138-2	+	24992697	24992779	28	bta-miR-138	18		Udder depth	1616
rs466354909	A	A	A/T	18	24992727	24992728	MI0005029	bta-mir-138-2	+	24992697	24992779	32	bta-miR-138	22		Udder depth	1616
rs433582479	C	C	C/G	4	47367065	47367066	MI0011465	bta-mir-2284b	-	47367036	47367106	41	CM	19008		Udder depth	4972
rs110555814	G	G	G/T	4	49304498	49304499	MI0011464	bta-mir-2418	-	49304452	49304527	29	bta-miR-2418	21		Udder depth	4972
rs443484521	A	A	A/C	4	49304499	49304500	MI0011464	bta-mir-2418	-	49304452	49304527	28	bta-miR-2418	20		Udder depth	4972
rs458822162	A	A	A/C	4	49304502	49304503	MI0011464	bta-mir-2418	-	49304452	49304527	25	bta-miR-2418	17		Udder depth	4972
rs477347665	C	C	C/T	4	49304503	49304504	MI0011464	bta-mir-2418	-	49304452	49304527	24	bta-miR-2418	16		Udder depth	4972
rs443012308	A	A	A/C	4	50323292	50323293	MI0011463	bta-mir-2417	-	50323245	50323319	27	bta-miR-2417	19		Udder depth	4972
rs521989148	G	G	A/G	9	25474398	25474399	MI0011538	bta-mir-2284o	+	25474384	25474444	16	bta-miR-2284o	10		Udder depth	1688
rs476988784	G	G	G/T	9	25474400	25474401	MI0011538	bta-mir-2284o	+	25474384	25474444	18	bta-miR-2284o	12		Udder depth	1688
rs451580359	A	A	A/C	9	26303393	26303394	MI0011539	bta-mir-2477	+	26303342	26303413	53	bta-miR-2477	10		Udder depth	1688
rs470990396	G	G	A/G	9	26303404	26303405	MI0011539	bta-mir-2477	+	26303342	26303413	64	bta-miR-2477	21		Udder depth	1688
rs459642470	C	C	C/T	13	58091687	58091688	MI0021141	bta-mir-6123	+	58091678	58091759	11	bta-miR-6123	2	inseed	Udder depth	1588
rs435574990	G	G	C/G	13	58091951	58091952	MI0009786	bta-mir-296	+	58091936	58092013	17	bta-miR-296-5p	3	inseed	Udder depth	1588
rs475806144	T	T	C/T	13	58091986	58091987	MI0009786	bta-mir-296	+	58091936	58092013	52	bta-miR-296-3p	4	inseed	Udder depth	1588
rs478393085	T	T	G/T	13	59489996	59489997	MI0011320	bta-mir-2307	+	59489950	59490018	48	bta-miR-2307	1	inseed	Udder depth	1588
rs517363306	G	G	A/G	13	59490003	59490004	MI0011320	bta-mir-2307	+	59489950	59490018	55	bta-miR-2307	8	inseed	Udder depth	1588
rs447150505	C	C	C/G	4	49304515	49304516	MI0011464	bta-mir-2418	-	49304452	49304527	12	bta-miR-2418	4	inseed	Udder depth	4972
rs460143302	G	G	G/T	9	25474394	25474395	MI0011538	bta-mir-2284o	+	25474384	25474444	12	bta-miR-2284o	6	inseed	Udder depth	1688
rs456690846	G	G	A/G	13	47087698	47087699	MI0022276	bta-mir-2285m-2	-	47087660	47087740	42				Udder depth	1588
rs476958360	A	A	A/C	13	47087701	47087702	MI0022276	bta-mir-2285m-2	-	47087660	47087740	39				Udder depth	1588
rs442267741	C	C	C/T	13	47087702	47087703	MI0022276	bta-mir-2285m-2	-	47087660	47087740	38				Udder depth	1588
rs462124377	G	G	A/G	13	47087707	47087708	MI0022276	bta-mir-2285m-2	-	47087660	47087740	33				Udder depth	1588
rs525969814	G	G	-/G	13	47087707	47087708	MI0022276	bta-mir-2285m-2	-	47087660	47087740	33				Udder depth	1588
rs479102252	A	A	A/C	13	47087711	47087712	MI0022276	bta-mir-2285m-2	-	47087660	47087740	29				Udder depth	1588
rs441157738	C	C	A/C	13	47087714	47087715	MI0022276	bta-mir-2285m-2	-	47087660	47087740	26				Udder depth	1588
rs458112127	T	T	A/T	13	47087718	47087719	MI0022276	bta-mir-2285m-2	-	47087660	47087740	22				Udder depth	1588
rs449954218	G	G	A/G/T	13	47087719	47087720	MI0022276	bta-mir-2285m-2	-	47087660	47087740	21				Udder depth	1588
rs445825644	A	A	A/C/T	13	47087721	47087722	MI0022276	bta-mir-2285m-2	-	47087660	47087740	19				Udder depth	1588
rs469166012	C	C	C/T	13	47087722	47087723	MI0022276	bta-mir-2285m-2	-	47087660	47087740	18				Udder depth	1588
rs482997840	G	G	C/G	13	47087729	47087730	MI0022276	bta-mir-2285m-2	-	47087660	47087740	11				Udder depth	1588
rs448320097	C	C	C/T	13	47087730	47087731	MI0022276	bta-mir-2285m-2	-	47087660	47087740	10				Udder depth	1588
rs135878508	C	C	C/T	13	47087731	47087732	MI0022276	bta-mir-2285m-2	-	47087660	47087740	9				Udder depth	1588
rs440019364	T	T	G/T	13	51742423	51742424	MI0005456	bta-mir-103-2	-	51742422	51742497	74				Udder depth	1588
rs455844741	A	A	A/G	13	51742466	51742467	MI0005456	bta-mir-103-2	-	51742422	51742497	31				Udder depth	1588
rs477213889	A	A	A/C	13	51742488	51742489	MI0005456	bta-mir-103-2	-	51742422	51742497	9				Udder depth	1588
rs462631789	C	C	C/T	13	55227360	55227361	MI0025193	bta-mir-133c	+	55227289	55227382	73	bta-miR-133c	16		Udder depth	1588
rs471421318	G	G	G/T	13	55227362	55227363	MI0025193	bta-mir-133c	+	55227289	55227382	75	bta-miR-133c	18		Udder depth	1588
rs443994813	A	A	A/T	13	55237555	55237556	MI0009719	bta-mir-1-1	-	55237544	55237619	64	bta-miR-1	16		Udder depth	1588
rs453899455	C	C	C/T	4	47367090	47367091	MI0011465	bta-mir-2284b	-	47367036	47367106	16	bta-miR-2284b	9		Udder depth	4972
rs469279334	C	C	A/C	13	47087670	47087671	MI0022276	bta-mir-2285m-2	-	47087660	47087740	70	bta-miR-2285m	21		Udder depth	1588
rs437860195	A	A	A/G	13	47087672	47087673	MI0022276	bta-mir-2285m-2	-	47087660	47087740	68	bta-miR-2285m	19		Udder depth	1588
rs454456140	G	G	G/T	13	47087676	47087677	MI0022276	bta-mir-2285m-2	-	47087660	47087740	64	bta-miR-2285m	15		Udder depth	1588
rs474579220	T	T	C/T	13	47087677	47087678	MI0022276	bta-mir-2285m-2	-	47087660	47087740	63	bta-miR-2285m	14		Udder depth	1588
rs433559601	A	A	A/T	13	47087680	47087681	MI0022276	bta-mir-2285m-2	-	47087660	47087740	60	bta-miR-2285m	11		Udder depth	1588
rs453868179	T	T	C/T	13	47087682	47087683	MI0022276	bta-mir-2285m-2	-	47087660	47087740	58	bta-miR-2285m	9		Udder depth	1588
rs460189731	C	C	A/C	13	51742435	51742436	MI0005456	bta-mir-103-2	-	51742422	51742497	62	bta-miR-103	15		Udder depth	1588
rs470669395	G	G	C/G	13	47087684	47087685	MI0022276	bta-mir-2285m-2	-	47087660	47087740	56	bta-miR-2285m	7	inseed	Udder depth	1588
rs439863837	G	G	G/T	13	47087686	47087687	MI0022276	bta-mir-2285m-2	-	47087660	47087740	54	bta-miR-2285m	5	inseed	Udder depth	1588

## Sheet: TLGTH
SNP_ID	refNCBI	refUCSC	Allele	Chromosome	chromStart	chromEnd	Pre_miRNA_ID	Pre-miRNA	Strand	Start position of pre-miRNA	End position of pre-miRNA	Position in_pre-miRNA	Name of Mature_sequence	Position in_mature_sequence	inseed	QTL	Number of QTL(#)
rs468109839	G	G	C/G	1	19881369	19881370	MI0005457	bta-mir-125b-2	-	19881347	19881431	62				Teat length	10274
rs433732298	C	C	C/T	1	19881371	19881372	MI0005457	bta-mir-125b-2	-	19881347	19881431	60				Teat length	10274
rs453912014	G	G	G/T	1	19881373	19881374	MI0005457	bta-mir-125b-2	-	19881347	19881431	58				Teat length	10274
rs470847969	C	C	A/C	1	19881375	19881376	MI0005457	bta-mir-125b-2	-	19881347	19881431	56				Teat length	10274
rs433051656	T	T	A/T	1	19881377	19881378	MI0005457	bta-mir-125b-2	-	19881347	19881431	54				Teat length	10274
rs526948738	A	A	A/G	1	19881389	19881390	MI0005457	bta-mir-125b-2	-	19881347	19881431	42				Teat length	10274
rs456460916	A	A	A/T	1	19881394	19881395	MI0005457	bta-mir-125b-2	-	19881347	19881431	37				Teat length	10274
rs475141511	G	G	C/G	1	19881423	19881424	MI0005457	bta-mir-125b-2	-	19881347	19881431	8				Teat length	10274
rs440558322	T	T	C/T	1	19881429	19881430	MI0005457	bta-mir-125b-2	-	19881347	19881431	2				Teat length	10274
rs431994764	A	A	A/G	1	19930483	19930484	MI0005454	bta-let-7c	-	19930459	19930542	59				Teat length	10274
rs798003873	C	C	A/C	1	19930507	19930508	MI0005454	bta-let-7c	-	19930459	19930542	35				Teat length	10274
rs468909014	C	C	A/C	1	19930533	19930534	MI0005454	bta-let-7c	-	19930459	19930542	9				Teat length	10274
rs437715928	C	C	C/T	1	19930534	19930535	MI0005454	bta-let-7c	-	19930459	19930542	8				Teat length	10274
rs440553959	G	G	G/T	1	19931219	19931220	MI0004751	bta-mir-99a	-	19931185	19931265	46				Teat length	10274
rs454199391	T	T	G/T	1	19931221	19931222	MI0004751	bta-mir-99a	-	19931185	19931265	44				Teat length	10274
rs471044054	A	A	A/C	1	19931229	19931230	MI0004751	bta-mir-99a	-	19931185	19931265	36				Teat length	10274
rs480424408	G	G	C/G	10	12690729	12690730	MI0011300	bta-mir-2290	-	12690727	12690806	77				Teat length	10296
rs478232367	A	A	A/C	10	12690766	12690767	MI0011300	bta-mir-2290	-	12690727	12690806	40				Teat length	10296
rs445230613	G	G	G/T	10	12690770	12690771	MI0011300	bta-mir-2290	-	12690727	12690806	36				Teat length	10296
rs467082733	C	C	C/G	10	12690775	12690776	MI0011300	bta-mir-2290	-	12690727	12690806	31				Teat length	10296
rs466078442	C	C	A/C	10	21340626	21340627	MI0009774	bta-mir-208b	+	21340622	21340698	6				Teat length	10296
rs436325199	A	A	A/G	10	21340627	21340628	MI0009774	bta-mir-208b	+	21340622	21340698	7				Teat length	10296
rs454693927	A	A	A/T	10	21340632	21340633	MI0009774	bta-mir-208b	+	21340622	21340698	12				Teat length	10296
rs476441637	T	T	G/T	10	21340636	21340637	MI0009774	bta-mir-208b	+	21340622	21340698	16				Teat length	10296
rs477321441	C	C	C/T	10	21340645	21340646	MI0009774	bta-mir-208b	+	21340622	21340698	25				Teat length	10296
rs437011109	C	C	C/G	10	21340660	21340661	MI0009774	bta-mir-208b	+	21340622	21340698	40				Teat length	10296
rs470689875	A	A	A/C	10	21340691	21340692	MI0009774	bta-mir-208b	+	21340622	21340698	71				Teat length	10296
rs435519207	A	A	A/C	10	21369598	21369599	MI0009773	bta-mir-208a	+	21369597	21369667	3				Teat length	10296
rs450597887	T	T	G/T	10	21369609	21369610	MI0009773	bta-mir-208a	+	21369597	21369667	14				Teat length	10296
rs469200080	G	G	C/G	10	21369618	21369619	MI0009773	bta-mir-208a	+	21369597	21369667	23				Teat length	10296
rs432829754	T	T	G/T	10	21369620	21369621	MI0009773	bta-mir-208a	+	21369597	21369667	25				Teat length	10296
rs451388058	A	A	A/T	10	21369624	21369625	MI0009773	bta-mir-208a	+	21369597	21369667	29				Teat length	10296
rs473115434	T	T	G/T	10	21369627	21369628	MI0009773	bta-mir-208a	+	21369597	21369667	32				Teat length	10296
rs442335235	C	C	C/G	10	21369665	21369666	MI0009773	bta-mir-208a	+	21369597	21369667	70				Teat length	10296
rs457302979	T	T	C/T	10	65243423	65243424	MI0009747	bta-mir-147	-	65243378	65243457	34				Teat length	10296
rs474330482	A	A	A/T	10	65243448	65243449	MI0009747	bta-mir-147	-	65243378	65243457	9				Teat length	10296
rs434523975	C	C	A/C	10	65462372	65462373	MI0011301	bta-mir-2291	-	65462367	65462440	68				Teat length	10296
rs441339457	G	G	C/G	10	65462411	65462412	MI0011301	bta-mir-2291	-	65462367	65462440	29				Teat length	10296
rs458466805	G	G	C/G	10	65462412	65462413	MI0011301	bta-mir-2291	-	65462367	65462440	28				Teat length	10296
rs478531878	A	A	A/C	10	65462414	65462415	MI0011301	bta-mir-2291	-	65462367	65462440	26				Teat length	10296
rs525198644	A	A	A/G	10	65462417	65462418	MI0011301	bta-mir-2291	-	65462367	65462440	23				Teat length	10296
rs443642226	C	C	A/C	10	65462420	65462421	MI0011301	bta-mir-2291	-	65462367	65462440	20				Teat length	10296
rs463714568	G	G	C/G	10	65462423	65462424	MI0011301	bta-mir-2291	-	65462367	65462440	17				Teat length	10296
rs480754002	A	A	A/G	10	65462425	65462426	MI0011301	bta-mir-2291	-	65462367	65462440	15				Teat length	10296
rs449407213	C	C	C/G	10	65462427	65462428	MI0011301	bta-mir-2291	-	65462367	65462440	13				Teat length	10296
rs723422071	A	A	A/G	13	8642589	8642590	MI0022273	bta-mir-2285n-2	+	8642568	8642648	23				Teat length	1386
rs518227765	G	G	A/G	13	8642590	8642591	MI0022273	bta-mir-2285n-2	+	8642568	8642648	24				Teat length	1386
rs521673644	A	A	A/C	13	8642616	8642617	MI0022273	bta-mir-2285n-2	+	8642568	8642648	50				Teat length	1386
rs436802469	A	A	A/G	13	8642641	8642642	MI0022273	bta-mir-2285n-2	+	8642568	8642648	75				Teat length	1386
rs442352373	A	A	A/G	13	13129063	13129064	MI0025536	bta-mir-7861	-	13129033	13129093	30				Teat length	1386
rs517267788	T	T	G/T	13	13129080	13129081	MI0025536	bta-mir-7861	-	13129033	13129093	13				Teat length	1386
rs464841515	G	G	A/G	13	23904473	23904474	MI0022322	bta-mir-2285k-2	-	23904418	23904498	25				Teat length	1386
rs714183003	C	C	C/T	13	23904497	23904498	MI0022322	bta-mir-2285k-2	-	23904418	23904498	1				Teat length	1386
rs476369569	T	T	C/T	13	28799343	28799344	MI0011317	bta-mir-2304	-	28799305	28799378	35				Teat length	1386
rs462318910	T	T	G/T	13	28799374	28799375	MI0011317	bta-mir-2304	-	28799305	28799378	4				Teat length	1386
rs476135638	C	C	A/C	13	28799375	28799376	MI0011317	bta-mir-2304	-	28799305	28799378	3				Teat length	1386
rs444690453	G	G	C/G	13	28799377	28799378	MI0011317	bta-mir-2304	-	28799305	28799378	1				Teat length	1386
rs475041311	T	T	G/T	13	58091726	58091727	MI0021141	bta-mir-6123	+	58091678	58091759	50				Teat length	1386
rs442062059	T	T	C/T	13	58091740	58091741	MI0021141	bta-mir-6123	+	58091678	58091759	64				Teat length	1386
rs463888878	G	G	G/T	13	58091748	58091749	MI0021141	bta-mir-6123	+	58091678	58091759	72				Teat length	1386
rs478632055	A	A	A/T	13	58091757	58091758	MI0021141	bta-mir-6123	+	58091678	58091759	81				Teat length	1386
rs455531490	A	A	A/T	13	58091938	58091939	MI0009786	bta-mir-296	+	58091936	58092013	4				Teat length	1386
rs439695944	G	G	A/G	13	58092007	58092008	MI0009786	bta-mir-296	+	58091936	58092013	73				Teat length	1386
rs465123679	G	G	A/G	13	59489979	59489980	MI0011320	bta-mir-2307	+	59489950	59490018	31				Teat length	1386
rs452613397	G	G	C/G	13	64900483	64900484	MI0004750	bta-mir-499	+	64900480	64900582	5				Teat length	1386
rs442671915	T	T	C/T	13	64900516	64900517	MI0004750	bta-mir-499	+	64900480	64900582	38				Teat length	1386
rs462732984	T	T	G/T	13	64900521	64900522	MI0004750	bta-mir-499	+	64900480	64900582	43				Teat length	1386
rs482599732	G	G	A/G	13	64900526	64900527	MI0004750	bta-mir-499	+	64900480	64900582	48				Teat length	1386
rs445030478	C	C	A/C	13	64900536	64900537	MI0004750	bta-mir-499	+	64900480	64900582	58				Teat length	1386
rs458613147	A	A	A/C	13	64900541	64900542	MI0004750	bta-mir-499	+	64900480	64900582	63				Teat length	1386
rs478767524	G	G	A/G	13	64900548	64900549	MI0004750	bta-mir-499	+	64900480	64900582	70				Teat length	1386
rs447187848	G	G	G/T	13	64900551	64900552	MI0004750	bta-mir-499	+	64900480	64900582	73				Teat length	1386
rs467348753	T	T	C/T	13	64900572	64900573	MI0004750	bta-mir-499	+	64900480	64900582	94				Teat length	1386
rs481053507	G	G	C/G	13	64900573	64900574	MI0004750	bta-mir-499	+	64900480	64900582	95				Teat length	1386
rs450412331	G	G	G/T	13	64900574	64900575	MI0004750	bta-mir-499	+	64900480	64900582	96				Teat length	1386
rs470516085	C	C	C/G	13	64900576	64900577	MI0004750	bta-mir-499	+	64900480	64900582	98				Teat length	1386
rs432511399	T	T	G/T	13	64900581	64900582	MI0004750	bta-mir-499	+	64900480	64900582	103				Teat length	1386
rs521696325	C	C	A/C	13	70737850	70737851	MI0009860	bta-mir-544b-1	+	70737770	70737854	82				Teat length	1386
rs434856000	G	G	C/G	13	73061029	73061030	MI0022277	bta-mir-2284y-2	-	73061014	73061091	62				Teat length	1386
rs434856000	G	G	C/G	13	73061029	73061030	MI0025197	bta-mir-2285u	+	73061005	73061105	26				Teat length	1386
rs381114112	A	A	A/G	13	73061052	73061053	MI0022277	bta-mir-2284y-2	-	73061014	73061091	39				Teat length	1386
rs381114112	A	A	A/G	13	73061052	73061053	MI0025197	bta-mir-2285u	+	73061005	73061105	49				Teat length	1386
rs446866577	G	G	G/T	13	73061082	73061083	MI0022277	bta-mir-2284y-2	-	73061014	73061091	9				Teat length	1386
rs446866577	G	G	G/T	13	73061082	73061083	MI0025197	bta-mir-2285u	+	73061005	73061105	79				Teat length	1386
rs468213965	G	G	A/G	16	24305748	24305749	MI0005016	bta-mir-215	-	24305737	24305815	67				Teat length	1608
rs444832927	T	T	A/T	16	24305772	24305773	MI0005016	bta-mir-215	-	24305737	24305815	43				Teat length	1608
rs720096550	A	A	A/G	16	24305774	24305775	MI0005016	bta-mir-215	-	24305737	24305815	41				Teat length	1608
rs723474091	G	G	A/G	16	24305780	24305781	MI0005016	bta-mir-215	-	24305737	24305815	35				Teat length	1608
rs386072876	C	C	C/T	16	24305813	24305814	MI0005016	bta-mir-215	-	24305737	24305815	2				Teat length	1608
rs518993891	A	A	A/G	16	24306028	24306029	MI0012208	bta-mir-194-1	-	24306024	24306120	92				Teat length	1608
rs522612632	A	A	A/G	16	24306038	24306039	MI0012208	bta-mir-194-1	-	24306024	24306120	82				Teat length	1608
rs720352814	G	G	A/G	16	24306112	24306113	MI0012208	bta-mir-194-1	-	24306024	24306120	8				Teat length	1608
rs210958565	A	A	A/G	16	24379918	24379919	MI0025533	bta-mir-664b	-	24379877	24379936	18				Teat length	1608
rs477057231	G	G	G/T	18	53654186	53654187	MI0009803	bta-mir-330	-	53654146	53654239	53				Teat length	1703
rs461484036	A	A	A/C	26	25988242	25988243	MI0009771	bta-mir-202	+	25988240	25988338	4				Teat length	1651
rs465495413	C	C	C/T	26	25988288	25988289	MI0009771	bta-mir-202	+	25988240	25988338	50				Teat length	1651
rs432653797	G	G	A/G	26	25988294	25988295	MI0009771	bta-mir-202	+	25988240	25988338	56				Teat length	1651
rs450964140	A	A	A/G	26	25988306	25988307	MI0009771	bta-mir-202	+	25988240	25988338	68				Teat length	1651
rs469429780	C	C	C/G	26	25988321	25988322	MI0009771	bta-mir-202	+	25988240	25988338	83				Teat length	1651
rs436616737	C	C	A/C/G	26	25988323	25988324	MI0009771	bta-mir-202	+	25988240	25988338	85				Teat length	1651
rs455330635	G	G	G/T	26	25988327	25988328	MI0009771	bta-mir-202	+	25988240	25988338	89				Teat length	1651
rs475785988	A	A	A/C	1	19881402	19881403	MI0005457	bta-mir-125b-2	-	19881347	19881431	29	bta-miR-125b	17		Teat length	10274
rs445704626	A	A	A/G	1	19930532	19930533	MI0005454	bta-let-7c	-	19930459	19930542	10	bta-let-7c	0		Teat length	10274
rs454974288	G	G	C/G	1	19931204	19931205	MI0004751	bta-mir-99a	-	19931185	19931265	61	bta-miR-99a-3p	12		Teat length	10274
rs475119528	A	A	A/G	1	19931205	19931206	MI0004751	bta-mir-99a	-	19931185	19931265	60	bta-miR-99a-3p	11		Teat length	10274
rs459963424	G	G	A/G	1	19931240	19931241	MI0004751	bta-mir-99a	-	19931185	19931265	25	bta-miR-99a-5p	13		Teat length	10274
rs450788044	A	A	A/C	10	12690750	12690751	MI0011300	bta-mir-2290	-	12690727	12690806	56	bta-miR-2290	9		Teat length	10296
rs452191983	T	T	C/T	10	21340683	21340684	MI0009774	bta-mir-208b	+	21340622	21340698	63	bta-miR-208b	16		Teat length	10296
rs445975008	T	T	C/T	10	21340685	21340686	MI0009774	bta-mir-208b	+	21340622	21340698	65	bta-miR-208b	18		Teat length	10296
rs433529602	A	A	A/G	10	21369652	21369653	MI0009773	bta-mir-208a	+	21369597	21369667	57	bta-miR-208a	12		Teat length	10296
rs455364701	G	G	C/G/T	10	21369659	21369660	MI0009773	bta-mir-208a	+	21369597	21369667	64	bta-miR-208a	19		Teat length	10296
rs475303571	T	T	A/T	10	21369660	21369661	MI0009773	bta-mir-208a	+	21369597	21369667	65	bta-miR-208a	20		Teat length	10296
rs431927661	G	G	G/T	10	30500498	30500499	MI0025184	bta-mir-2285g-2	+	30500492	30500569	8				Teat length	10296
rs719200654	C	C	C/T	10	30500500	30500501	MI0025184	bta-mir-2285g-2	+	30500492	30500569	10				Teat length	10296
rs456362245	A	A	A/C	10	30500526	30500527	MI0025184	bta-mir-2285g-2	+	30500492	30500569	36				Teat length	10296
rs136129862	A	A	A/G	10	30500529	30500530	MI0025184	bta-mir-2285g-2	+	30500492	30500569	39				Teat length	10296
rs444533175	T	T	A/T	10	30500530	30500531	MI0025184	bta-mir-2285g-2	+	30500492	30500569	40				Teat length	10296
rs109467282	A	A	A/G	10	30500563	30500564	MI0025184	bta-mir-2285g-2	+	30500492	30500569	73				Teat length	10296
rs483241785	C	C	C/G	10	30500566	30500567	MI0025184	bta-mir-2285g-2	+	30500492	30500569	76				Teat length	10296
rs444923874	G	G	A/G	10	30500568	30500569	MI0025184	bta-mir-2285g-2	+	30500492	30500569	78				Teat length	10296
rs466432510	T	T	G/T	10	42712642	42712643	MI0022268	bta-mir-6517	+	42712635	42712712	9				Teat length	10296
rs453829922	A	A	A/T	10	42712669	42712670	MI0022268	bta-mir-6517	+	42712635	42712712	36				Teat length	10296
rs472386829	G	G	G/T	10	42712674	42712675	MI0022268	bta-mir-6517	+	42712635	42712712	41				Teat length	10296
rs439387933	C	C	C/G	10	42712679	42712680	MI0022268	bta-mir-6517	+	42712635	42712712	46				Teat length	10296
rs451392160	T	T	C/T	10	42712698	42712699	MI0022268	bta-mir-6517	+	42712635	42712712	65				Teat length	10296
rs476319348	G	G	C/G	10	42712702	42712703	MI0022268	bta-mir-6517	+	42712635	42712712	69				Teat length	10296
rs443228538	G	G	C/G/T	10	42712703	42712704	MI0022268	bta-mir-6517	+	42712635	42712712	70				Teat length	10296
rs461768487	G	G	G/T	10	42712707	42712708	MI0022268	bta-mir-6517	+	42712635	42712712	74				Teat length	10296
rs445176346	T	T	G/T	10	55017760	55017761	MI0009878	bta-mir-628	+	55017684	55017778	78				Teat length	10296
rs475278157	G	G	G/T	10	55017771	55017772	MI0009878	bta-mir-628	+	55017684	55017778	89				Teat length	10296
rs520834664	A	A	A/G	10	58120483	58120484	MI0010483	bta-mir-1248-2	+	58120391	58120495	94				Teat length	10296
rs451619327	G	G	A/G/T	10	65462377	65462378	MI0011301	bta-mir-2291	-	65462367	65462440	63	bta-miR-2291	22		Teat length	10296
rs465192430	C	C	C/G	10	65462378	65462379	MI0011301	bta-mir-2291	-	65462367	65462440	62	bta-miR-2291	21		Teat length	10296
rs436825278	C	C	A/C	10	65462379	65462380	MI0011301	bta-mir-2291	-	65462367	65462440	61	bta-miR-2291	20		Teat length	10296
rs456859763	C	C	C/T	10	65462389	65462390	MI0011301	bta-mir-2291	-	65462367	65462440	51	bta-miR-2291	10		Teat length	10296
rs473974861	A	A	A/C	10	65462390	65462391	MI0011301	bta-mir-2291	-	65462367	65462440	50	bta-miR-2291	9		Teat length	10296
rs722332678	G	G	A/G	10	67304473	67304474	MI0011302	bta-mir-2292	+	67304417	67304486	58	bta-miR-2292	14		Teat length	10296
rs472235104	A	A	A/T	13	13129038	13129039	MI0025536	bta-mir-7861	-	13129033	13129093	55	bta-miR-7861	17		Teat length	1386
rs517541614	A	A	A/G	13	39836902	39836903	MI0011318	bta-mir-2305	+	39836873	39836938	31				Teat length	1386
rs41686132	A	A	G/T	13	39836924	39836925	MI0011318	bta-mir-2305	+	39836873	39836938	53				Teat length	1386
rs432326926	A	A	A/C	13	55227294	55227295	MI0025193	bta-mir-133c	+	55227289	55227382	7				Teat length	1386
rs432326926	A	A	A/C	13	55227294	55227295	MI0009733	bta-mir-133a-1	-	55227292	55227386	92				Teat length	1386
rs454296478	A	A	A/T	13	55227295	55227296	MI0025193	bta-mir-133c	+	55227289	55227382	8				Teat length	1386
rs454296478	A	A	A/T	13	55227295	55227296	MI0009733	bta-mir-133a-1	-	55227292	55227386	91				Teat length	1386
rs472904666	G	G	C/G	13	55227302	55227303	MI0025193	bta-mir-133c	+	55227289	55227382	15				Teat length	1386
rs472904666	G	G	C/G	13	55227302	55227303	MI0009733	bta-mir-133a-1	-	55227292	55227386	84				Teat length	1386
rs436591897	C	C	C/G	13	55227303	55227304	MI0025193	bta-mir-133c	+	55227289	55227382	16				Teat length	1386
rs436591897	C	C	C/G	13	55227303	55227304	MI0009733	bta-mir-133a-1	-	55227292	55227386	83				Teat length	1386
rs455074531	T	T	A/T	13	55227304	55227305	MI0025193	bta-mir-133c	+	55227289	55227382	17				Teat length	1386
rs455074531	T	T	A/T	13	55227304	55227305	MI0009733	bta-mir-133a-1	-	55227292	55227386	82				Teat length	1386
rs476836013	A	A	A/T	13	55227338	55227339	MI0025193	bta-mir-133c	+	55227289	55227382	51				Teat length	1386
rs476836013	A	A	A/T	13	55227338	55227339	MI0009733	bta-mir-133a-1	-	55227292	55227386	48				Teat length	1386
rs444186133	A	A	A/C	13	55227343	55227344	MI0025193	bta-mir-133c	+	55227289	55227382	56				Teat length	1386
rs444186133	A	A	A/C	13	55227343	55227344	MI0009733	bta-mir-133a-1	-	55227292	55227386	43				Teat length	1386
rs462631789	C	C	C/T	13	55227360	55227361	MI0009733	bta-mir-133a-1	-	55227292	55227386	26				Teat length	1386
rs471421318	G	G	G/T	13	55227362	55227363	MI0009733	bta-mir-133a-1	-	55227292	55227386	24				Teat length	1386
rs438391142	C	C	C/G	13	55227382	55227383	MI0025193	bta-mir-133c	+	55227289	55227382	95				Teat length	1386
rs438391142	C	C	C/G	13	55227382	55227383	MI0009733	bta-mir-133a-1	-	55227292	55227386	4				Teat length	1386
rs467730336	A	A	A/G	13	58091948	58091949	MI0009786	bta-mir-296	+	58091936	58092013	14	bta-miR-296-5p	0		Teat length	1386
rs457285484	C	C	C/T	13	58091963	58091964	MI0009786	bta-mir-296	+	58091936	58092013	29	bta-miR-296-5p	15		Teat length	1386
rs445327585	A	A	A/C	13	59490005	59490006	MI0011320	bta-mir-2307	+	59489950	59490018	57	bta-miR-2307	10		Teat length	1386
rs461311458	G	G	G/T	13	64900509	64900510	MI0004750	bta-mir-499	+	64900480	64900582	31	bta-miR-499	16		Teat length	1386
rs474087409	T	T	C/T	13	64900510	64900511	MI0004750	bta-mir-499	+	64900480	64900582	32	bta-miR-499	17		Teat length	1386
rs384165896	C	C	C/T	13	73061072	73061073	MI0022277	bta-mir-2284y-2	-	73061014	73061091	19	bta-miR-2284y	9		Teat length	1386
rs384165896	C	C	C/T	13	73061072	73061073	MI0025197	bta-mir-2285u	+	73061005	73061105	69	bta-miR-2285u	11		Teat length	1386
rs41885631	A	A	G/T	18	48594054	48594055	MI0011355	bta-mir-2329-2	+	48594020	48594085	36				Teat length	1703
rs41885631	A	A	G/T	18	48594054	48594055	MI0011354	bta-mir-2329-1	-	48594020	48594085	31				Teat length	1703
rs477872416	T	T	A/T	18	53945882	53945883	MI0009898	bta-mir-769	+	53945876	53945994	8				Teat length	1703
rs524412685	G	G	A/G	18	53945883	53945884	MI0009898	bta-mir-769	+	53945876	53945994	9				Teat length	1703
rs210343727	C	C	C/T	18	53945895	53945896	MI0009898	bta-mir-769	+	53945876	53945994	21				Teat length	1703
rs446469426	T	T	A/T	18	53945905	53945906	MI0009898	bta-mir-769	+	53945876	53945994	31				Teat length	1703
rs466447339	A	A	A/T	18	53945949	53945950	MI0009898	bta-mir-769	+	53945876	53945994	75				Teat length	1703
rs435117271	G	G	A/G	18	53945985	53945986	MI0009898	bta-mir-769	+	53945876	53945994	111				Teat length	1703
rs449973878	A	A	A/G	18	54224767	54224768	MI0013072	bta-mir-2897	+	54224747	54224815	22				Teat length	1703
rs469994220	C	C	C/G	18	54224770	54224771	MI0013072	bta-mir-2897	+	54224747	54224815	25				Teat length	1703
rs432109855	C	C	C/T	18	54224787	54224788	MI0013072	bta-mir-2897	+	54224747	54224815	42				Teat length	1703
rs445769489	C	C	A/C	18	54224792	54224793	MI0013072	bta-mir-2897	+	54224747	54224815	47				Teat length	1703
rs465929568	A	A	A/C/G	18	54224793	54224794	MI0013072	bta-mir-2897	+	54224747	54224815	48				Teat length	1703
rs434471907	T	T	G/T	18	54224796	54224797	MI0013072	bta-mir-2897	+	54224747	54224815	51				Teat length	1703
rs454546658	A	A	A/C	18	54224797	54224798	MI0013072	bta-mir-2897	+	54224747	54224815	52				Teat length	1703
rs468125695	G	G	A/G	18	54224798	54224799	MI0013072	bta-mir-2897	+	54224747	54224815	53				Teat length	1703
rs436681037	T	T	G/T	18	54224803	54224804	MI0013072	bta-mir-2897	+	54224747	54224815	58				Teat length	1703
rs456756766	G	G	G/T	19	38542857	38542858	MI0013059	bta-mir-2886	+	38542846	38542920	13				Teat length	1619
rs441786573	T	T	G/T	19	38549335	38549336	MI0005007	bta-mir-10a	+	38549254	38549362	83				Teat length	1619
rs461485972	C	C	C/G	19	38549354	38549355	MI0005007	bta-mir-10a	+	38549254	38549362	102				Teat length	1619
rs453282545	T	T	G/T	19	38899675	38899676	MI0011368	bta-mir-2340	+	38899671	38899746	6				Teat length	1619
rs723439207	C	C	C/T	19	38899685	38899686	MI0011368	bta-mir-2340	+	38899671	38899746	16				Teat length	1619
rs468994112	T	T	G/T	19	39081166	39081167	MI0009748	bta-mir-152	+	39081165	39081250	3				Teat length	1619
rs432805699	C	C	C/G	19	39081167	39081168	MI0009748	bta-mir-152	+	39081165	39081250	4				Teat length	1619
rs110339121	T	T	C/T	19	39081169	39081170	MI0009748	bta-mir-152	+	39081165	39081250	6				Teat length	1619
rs466519287	G	G	C/G	19	39081174	39081175	MI0015944	bta-mir-2957	-	39081172	39081242	68				Teat length	1619
rs466519287	G	G	C/G	19	39081174	39081175	MI0009748	bta-mir-152	+	39081165	39081250	11				Teat length	1619
rs434921709	C	C	A/C	19	39081175	39081176	MI0015944	bta-mir-2957	-	39081172	39081242	67				Teat length	1619
rs434921709	C	C	A/C	19	39081175	39081176	MI0009748	bta-mir-152	+	39081165	39081250	12				Teat length	1619
rs453384516	A	A	A/C/G	19	39081178	39081179	MI0015944	bta-mir-2957	-	39081172	39081242	64				Teat length	1619
rs453384516	A	A	A/C/G	19	39081178	39081179	MI0009748	bta-mir-152	+	39081165	39081250	15				Teat length	1619
rs475065413	G	G	A/G	19	39081179	39081180	MI0015944	bta-mir-2957	-	39081172	39081242	63				Teat length	1619
rs475065413	G	G	A/G	19	39081179	39081180	MI0009748	bta-mir-152	+	39081165	39081250	16				Teat length	1619
rs442294414	T	T	C/T	19	39081181	39081182	MI0015944	bta-mir-2957	-	39081172	39081242	61				Teat length	1619
rs442294414	T	T	C/T	19	39081181	39081182	MI0009748	bta-mir-152	+	39081165	39081250	18				Teat length	1619
rs457608116	T	T	C/T	19	39081182	39081183	MI0015944	bta-mir-2957	-	39081172	39081242	60				Teat length	1619
rs457608116	T	T	C/T	19	39081182	39081183	MI0009748	bta-mir-152	+	39081165	39081250	19				Teat length	1619
rs475831448	T	T	G/T	19	39081184	39081185	MI0015944	bta-mir-2957	-	39081172	39081242	58				Teat length	1619
rs475831448	T	T	G/T	19	39081184	39081185	MI0009748	bta-mir-152	+	39081165	39081250	21				Teat length	1619
rs439625522	T	T	G/T	19	39081186	39081187	MI0015944	bta-mir-2957	-	39081172	39081242	56				Teat length	1619
rs439625522	T	T	G/T	19	39081186	39081187	MI0009748	bta-mir-152	+	39081165	39081250	23				Teat length	1619
rs458198446	G	G	C/G	19	39081187	39081188	MI0015944	bta-mir-2957	-	39081172	39081242	55				Teat length	1619
rs458198446	G	G	C/G	19	39081187	39081188	MI0009748	bta-mir-152	+	39081165	39081250	24				Teat length	1619
rs524184723	A	A	-/A	19	39081190	39081191	MI0015944	bta-mir-2957	-	39081172	39081242	52				Teat length	1619
rs524184723	A	A	-/A	19	39081190	39081191	MI0009748	bta-mir-152	+	39081165	39081250	27				Teat length	1619
rs479935021	T	T	A/T	19	39081208	39081209	MI0015944	bta-mir-2957	-	39081172	39081242	34				Teat length	1619
rs479935021	T	T	A/T	19	39081208	39081209	MI0009748	bta-mir-152	+	39081165	39081250	45				Teat length	1619
rs440186155	A	A	A/C/G	19	39081211	39081212	MI0015944	bta-mir-2957	-	39081172	39081242	31				Teat length	1619
rs440186155	A	A	A/C/G	19	39081211	39081212	MI0009748	bta-mir-152	+	39081165	39081250	48				Teat length	1619
rs461951044	A	A	A/G	19	39081214	39081215	MI0015944	bta-mir-2957	-	39081172	39081242	28				Teat length	1619
rs461951044	A	A	A/G	19	39081214	39081215	MI0009748	bta-mir-152	+	39081165	39081250	51				Teat length	1619
rs433660833	C	C	C/T	19	39081239	39081240	MI0015944	bta-mir-2957	-	39081172	39081242	3				Teat length	1619
rs433660833	C	C	C/T	19	39081239	39081240	MI0009748	bta-mir-152	+	39081165	39081250	76				Teat length	1619
rs448935827	C	C	A/C	19	39081240	39081241	MI0015944	bta-mir-2957	-	39081172	39081242	2				Teat length	1619
rs448935827	C	C	A/C	19	39081240	39081241	MI0009748	bta-mir-152	+	39081165	39081250	77				Teat length	1619
rs468600262	G	G	G/T	19	39081242	39081243	MI0015944	bta-mir-2957	-	39081172	39081242	0				Teat length	1619
rs468600262	G	G	G/T	19	39081242	39081243	MI0009748	bta-mir-152	+	39081165	39081250	79				Teat length	1619
rs435813987	A	A	A/G	19	39081247	39081248	MI0009748	bta-mir-152	+	39081165	39081250	84				Teat length	1619
rs472742195	T	T	A/T	19	40516440	40516441	MI0011370	bta-mir-2342	+	40516423	40516496	19				Teat length	1619
rs439970082	T	T	G/T	19	40516442	40516443	MI0011370	bta-mir-2342	+	40516423	40516496	21				Teat length	1619
rs460173649	T	T	G/T	19	40516450	40516451	MI0011370	bta-mir-2342	+	40516423	40516496	29				Teat length	1619
rs433894495	T	T	G/T	19	40516494	40516495	MI0011370	bta-mir-2342	+	40516423	40516496	73				Teat length	1619
rs466930380	A	A	A/C/G	19	40683920	40683921	MI0021119	bta-mir-4286-1	-	40683920	40683995	75				Teat length	1619
rs435734491	T	T	G/T	19	40683922	40683923	MI0021119	bta-mir-4286-1	-	40683920	40683995	73				Teat length	1619
rs449505526	C	C	C/G	19	40683928	40683929	MI0021119	bta-mir-4286-1	-	40683920	40683995	67				Teat length	1619
rs469659593	A	A	A/C/T	19	40683932	40683933	MI0021119	bta-mir-4286-1	-	40683920	40683995	63				Teat length	1619
rs438285671	C	C	C/G	19	40683934	40683935	MI0021119	bta-mir-4286-1	-	40683920	40683995	61				Teat length	1619
rs456845710	A	A	A/C	19	40683943	40683944	MI0021119	bta-mir-4286-1	-	40683920	40683995	52				Teat length	1619
rs470606091	G	G	G/T	19	40683945	40683946	MI0021119	bta-mir-4286-1	-	40683920	40683995	50				Teat length	1619
rs521325767	G	G	A/G	19	40683957	40683958	MI0021119	bta-mir-4286-1	-	40683920	40683995	38				Teat length	1619
rs522134373	-	-	-/A	19	40683961	40683961	MI0021119	bta-mir-4286-1	-	40683920	40683995	34				Teat length	1619
rs432776405	C	C	A/C	19	40683962	40683963	MI0021119	bta-mir-4286-1	-	40683920	40683995	33				Teat length	1619
rs453009503	A	A	A/C	19	40683963	40683964	MI0021119	bta-mir-4286-1	-	40683920	40683995	32				Teat length	1619
rs473137329	A	A	A/G	19	40683964	40683965	MI0021119	bta-mir-4286-1	-	40683920	40683995	31				Teat length	1619
rs441792447	G	G	C/G	19	40683968	40683969	MI0021119	bta-mir-4286-1	-	40683920	40683995	27				Teat length	1619
rs477985782	T	T	C/G/T	19	40683989	40683990	MI0021119	bta-mir-4286-1	-	40683920	40683995	6				Teat length	1619
rs440395658	G	G	A/G	19	40683992	40683993	MI0021119	bta-mir-4286-1	-	40683920	40683995	3				Teat length	1619
rs460465268	C	C	A/C	19	40683994	40683995	MI0021119	bta-mir-4286-1	-	40683920	40683995	1				Teat length	1619
rs799910088	CT	CT	-/CT	19	45204959	45204961	MI0011371	bta-mir-2343	-	45204924	45204997	38				Teat length	1619
rs800726812	T	T	G/T	19	45204962	45204963	MI0011371	bta-mir-2343	-	45204924	45204997	35				Teat length	1619
rs41974457	G	G	A/G	21	19985044	19985045	MI0010459	bta-mir-1179	+	19984962	19985051	84				Teat length	1713
rs41974473	A	A	A/G	21	19989080	19989081	MI0010471	bta-mir-7-1	+	19989064	19989161	18				Teat length	1713
rs41974474	T	T	C/T	21	19989150	19989151	MI0010471	bta-mir-7-1	+	19989064	19989161	88				Teat length	1713
rs458957967	A	A	A/G	21	21157513	21157514	MI0011393	bta-mir-2363-1	+	21157504	21157577	11				Teat length	1713
rs467511526	C	C	A/C	21	21157516	21157517	MI0011393	bta-mir-2363-1	+	21157504	21157577	14				Teat length	1713
rs800675168	C	C	C/T	21	21157517	21157518	MI0011393	bta-mir-2363-1	+	21157504	21157577	15				Teat length	1713
rs798895576	AC	AC	-/AC	21	21157521	21157523	MI0011393	bta-mir-2363-1	+	21157504	21157577	20				Teat length	1713
rs482246126	C	C	C/G	21	21157523	21157524	MI0011393	bta-mir-2363-1	+	21157504	21157577	21				Teat length	1713
rs799341618	-	-	-/A	21	21157527	21157527	MI0011393	bta-mir-2363-1	+	21157504	21157577	24				Teat length	1713
rs797501154	T	T	G/T	21	21157527	21157528	MI0011393	bta-mir-2363-1	+	21157504	21157577	25				Teat length	1713
rs450781760	G	G	C/G	21	21157529	21157530	MI0011393	bta-mir-2363-1	+	21157504	21157577	27				Teat length	1713
rs461291765	A	A	A/C	21	21157531	21157532	MI0011393	bta-mir-2363-1	+	21157504	21157577	29				Teat length	1713
rs481372281	T	T	G/T	21	21157534	21157535	MI0011393	bta-mir-2363-1	+	21157504	21157577	32				Teat length	1713
rs481372281	T	T	G/T	21	21157534	21157535	MI0011394	bta-mir-2363-2	-	21157505	21157576	42				Teat length	1713
rs446639139	A	A	A/T	21	21157535	21157536	MI0011393	bta-mir-2363-1	+	21157504	21157577	33				Teat length	1713
rs446639139	A	A	A/T	21	21157535	21157536	MI0011394	bta-mir-2363-2	-	21157505	21157576	41				Teat length	1713
rs466562502	T	T	A/T	21	21157537	21157538	MI0011393	bta-mir-2363-1	+	21157504	21157577	35				Teat length	1713
rs466562502	T	T	A/T	21	21157537	21157538	MI0011394	bta-mir-2363-2	-	21157505	21157576	39				Teat length	1713
rs432068059	G	G	G/T	21	21157540	21157541	MI0011393	bta-mir-2363-1	+	21157504	21157577	38				Teat length	1713
rs432068059	G	G	G/T	21	21157540	21157541	MI0011394	bta-mir-2363-2	-	21157505	21157576	36				Teat length	1713
rs445676426	A	A	A/C	21	21157541	21157542	MI0011393	bta-mir-2363-1	+	21157504	21157577	39				Teat length	1713
rs445676426	A	A	A/C	21	21157541	21157542	MI0011394	bta-mir-2363-2	-	21157505	21157576	35				Teat length	1713
rs468884107	G	G	C/G/T	21	21157546	21157547	MI0011393	bta-mir-2363-1	+	21157504	21157577	44				Teat length	1713
rs468884107	G	G	C/G/T	21	21157546	21157547	MI0011394	bta-mir-2363-2	-	21157505	21157576	30				Teat length	1713
rs481045526	T	T	A/T	21	21157573	21157574	MI0011393	bta-mir-2363-1	+	21157504	21157577	71				Teat length	1713
rs481045526	T	T	A/T	21	21157573	21157574	MI0011394	bta-mir-2363-2	-	21157505	21157576	3				Teat length	1713
rs440591497	A	A	A/C	21	21250102	21250103	MI0009912	bta-mir-9-1	+	21250101	21250190	3				Teat length	1713
rs476573083	A	A	A/C	21	21250147	21250148	MI0009912	bta-mir-9-1	+	21250101	21250190	48				Teat length	1713
rs441914473	C	C	C/G	21	21250150	21250151	MI0009912	bta-mir-9-1	+	21250101	21250190	51				Teat length	1713
rs433469828	C	C	C/T	21	22859943	22859944	MI0011395	bta-mir-2364	+	22859905	22859978	40				Teat length	1713
rs109316517	G	G	C/G	21	22859956	22859957	MI0011395	bta-mir-2364	+	22859905	22859978	53				Teat length	1713
rs441121233	C	C	C/T	21	22859963	22859964	MI0011395	bta-mir-2364	+	22859905	22859978	60				Teat length	1713
rs473643314	A	A	A/C	21	22859966	22859967	MI0011395	bta-mir-2364	+	22859905	22859978	63				Teat length	1713
rs446882521	A	A	A/C	26	25988270	25988271	MI0009771	bta-mir-202	+	25988240	25988338	32	bta-miR-202	12		Teat length	1651
rs432724822	T	T	A/T	5	25109059	25109060	MI0005463	bta-mir-331	+	25109057	25109146	4				Teat length	1565
rs451517673	T	T	C/T	5	25109060	25109061	MI0005463	bta-mir-331	+	25109057	25109146	5				Teat length	1565
rs470073324	G	G	A/G/T	5	25109062	25109063	MI0005463	bta-mir-331	+	25109057	25109146	7				Teat length	1565
rs437019934	A	A	A/G	5	25109140	25109141	MI0005463	bta-mir-331	+	25109057	25109146	85				Teat length	1565
rs479159991	A	A	A/T	5	25849829	25849830	MI0005030	bta-mir-148b	-	25849764	25849853	24				Teat length	1565
rs446078424	A	A	A/T	5	25849834	25849835	MI0005030	bta-mir-148b	-	25849764	25849853	19				Teat length	1565
rs438251959	A	A	A/G	5	26157898	26157899	MI0009877	bta-mir-615	-	26157879	26157971	73				Teat length	1565
rs456424841	C	C	C/G	5	26157899	26157900	MI0009877	bta-mir-615	-	26157879	26157971	72				Teat length	1565
rs474791399	G	G	A/G	5	26157909	26157910	MI0009877	bta-mir-615	-	26157879	26157971	62				Teat length	1565
rs442111331	A	A	A/C	5	26157910	26157911	MI0009877	bta-mir-615	-	26157879	26157971	61				Teat length	1565
rs460617771	G	G	A/G	5	26157913	26157914	MI0009877	bta-mir-615	-	26157879	26157971	58				Teat length	1565
rs472685412	A	A	A/G	5	26157915	26157916	MI0009877	bta-mir-615	-	26157879	26157971	56				Teat length	1565
rs522490993	-	-	-/A	5	26157926	26157926	MI0009877	bta-mir-615	-	26157879	26157971	45				Teat length	1565
rs135192547	T	T	C/T	5	26157955	26157956	MI0009877	bta-mir-615	-	26157879	26157971	16				Teat length	1565
rs446316196	T	T	G/T	5	26199806	26199807	MI0009766	bta-mir-196a-2	-	26199801	26199885	79				Teat length	1565
rs464663431	A	A	A/C	5	26199810	26199811	MI0009766	bta-mir-196a-2	-	26199801	26199885	75				Teat length	1565
rs445334840	C	C	A/C	5	26199811	26199812	MI0009766	bta-mir-196a-2	-	26199801	26199885	74				Teat length	1565
rs437981803	G	G	A/G	5	26199816	26199817	MI0009766	bta-mir-196a-2	-	26199801	26199885	69				Teat length	1565
rs456356547	A	A	A/C	5	26199845	26199846	MI0009766	bta-mir-196a-2	-	26199801	26199885	40				Teat length	1565
rs468543262	T	T	C/T	5	26199847	26199848	MI0009766	bta-mir-196a-2	-	26199801	26199885	38				Teat length	1565
rs435648071	C	C	A/C	5	26199848	26199849	MI0009766	bta-mir-196a-2	-	26199801	26199885	37				Teat length	1565
rs444077803	C	C	A/C	5	26199873	26199874	MI0009766	bta-mir-196a-2	-	26199801	26199885	12				Teat length	1565
rs462535706	T	T	C/T	5	26199879	26199880	MI0009766	bta-mir-196a-2	-	26199801	26199885	6				Teat length	1565
rs444490628	G	G	G/T	1	19881415	19881416	MI0005457	bta-mir-125b-2	-	19881347	19881431	16	bta-miR-125b	4	inseed	Teat length	10274
rs461396603	G	G	A/G/T	1	19881417	19881418	MI0005457	bta-mir-125b-2	-	19881347	19881431	14	bta-miR-125b	2	inseed	Teat length	10274
rs462876910	G	G	G/T	10	12690757	12690758	MI0011300	bta-mir-2290	-	12690727	12690806	49	bta-miR-2290	2	inseed	Teat length	10296
rs442471207	C	C	A/C	10	65462391	65462392	MI0011301	bta-mir-2291	-	65462367	65462440	49	bta-miR-2291	8	inseed	Teat length	10296
rs452851516	T	T	C/T	10	65462394	65462395	MI0011301	bta-mir-2291	-	65462367	65462440	46	bta-miR-2291	5	inseed	Teat length	10296
rs472610965	C	C	C/G	10	65462395	65462396	MI0011301	bta-mir-2291	-	65462367	65462440	45	bta-miR-2291	4	inseed	Teat length	10296
rs209629713	T	T	G/T	10	67304463	67304464	MI0011302	bta-mir-2292	+	67304417	67304486	48	bta-miR-2292	4	inseed	Teat length	10296
rs459642470	C	C	C/T	13	58091687	58091688	MI0021141	bta-mir-6123	+	58091678	58091759	11	bta-miR-6123	2	inseed	Teat length	1386
rs435574990	G	G	C/G	13	58091951	58091952	MI0009786	bta-mir-296	+	58091936	58092013	17	bta-miR-296-5p	3	inseed	Teat length	1386
rs475806144	T	T	C/T	13	58091986	58091987	MI0009786	bta-mir-296	+	58091936	58092013	52	bta-miR-296-3p	4	inseed	Teat length	1386
rs478393085	T	T	G/T	13	59489996	59489997	MI0011320	bta-mir-2307	+	59489950	59490018	48	bta-miR-2307	1	inseed	Teat length	1386
rs517363306	G	G	A/G	13	59490003	59490004	MI0011320	bta-mir-2307	+	59489950	59490018	55	bta-miR-2307	8	inseed	Teat length	1386
rs472697122	A	A	A/C	13	64900497	64900498	MI0004750	bta-mir-499	+	64900480	64900582	19	bta-miR-499	4	inseed	Teat length	1386
rs441169721	G	G	G/T	13	64900501	64900502	MI0004750	bta-mir-499	+	64900480	64900582	23	bta-miR-499	8	inseed	Teat length	1386
rs466599622	G	G	C/G	16	24305798	24305799	MI0005016	bta-mir-215	-	24305737	24305815	17	bta-miR-215	6	inseed	Teat length	1608
rs433702435	T	T	G/T	16	24305800	24305801	MI0005016	bta-mir-215	-	24305737	24305815	15	bta-miR-215	4	inseed	Teat length	1608
rs479846901	C	C	A/C	26	25988265	25988266	MI0009771	bta-mir-202	+	25988240	25988338	27	bta-miR-202	7	inseed	Teat length	1651
rs440462126	A	A	A/G	10	30500549	30500550	MI0025184	bta-mir-2285g-2	+	30500492	30500569	59	bta-miR-2285g	9		Teat length	10296
rs460516878	G	G	A/G/T	10	30500551	30500552	MI0025184	bta-mir-2285g-2	+	30500492	30500569	61	bta-miR-2285g	11		Teat length	10296
rs480989467	C	C	A/C	10	30500552	30500553	MI0025184	bta-mir-2285g-2	+	30500492	30500569	62	bta-miR-2285g	12		Teat length	10296
rs443092119	G	G	G/T	10	30500558	30500559	MI0025184	bta-mir-2285g-2	+	30500492	30500569	68	bta-miR-2285g	18		Teat length	10296
rs478343723	C	C	C/T	10	42712645	42712646	MI0022268	bta-mir-6517	+	42712635	42712712	12	bta-miR-6517	0		Teat length	10296
rs468283140	C	C	A/C	10	42712666	42712667	MI0022268	bta-mir-6517	+	42712635	42712712	33	bta-miR-6517	21		Teat length	10296
rs435521018	G	G	G/T	10	42712667	42712668	MI0022268	bta-mir-6517	+	42712635	42712712	34	bta-miR-6517	22		Teat length	10296
rs437996939	T	T	A/T	10	47321095	47321096	MI0009762	bta-mir-190a	-	47321061	47321145	50				Teat length	10296
rs460322325	G	G	A/G	10	47321138	47321139	MI0009762	bta-mir-190a	-	47321061	47321145	7				Teat length	10296
rs523158140	C	C	-/C	10	47321143	47321144	MI0009762	bta-mir-190a	-	47321061	47321145	2				Teat length	10296
rs135483577	A	A	A/G	13	39836889	39836890	MI0011318	bta-mir-2305	+	39836873	39836938	18	bta-miR-2305	13		Teat length	1386
rs721515528	G	G	C/G	13	39836891	39836892	MI0011318	bta-mir-2305	+	39836873	39836938	20	bta-miR-2305	15		Teat length	1386
rs455137965	G	G	C/G	13	39836895	39836896	MI0011318	bta-mir-2305	+	39836873	39836938	24	bta-miR-2305	19		Teat length	1386
rs456690846	G	G	A/G	13	47087698	47087699	MI0022276	bta-mir-2285m-2	-	47087660	47087740	42				Teat length	1386
rs476958360	A	A	A/C	13	47087701	47087702	MI0022276	bta-mir-2285m-2	-	47087660	47087740	39				Teat length	1386
rs442267741	C	C	C/T	13	47087702	47087703	MI0022276	bta-mir-2285m-2	-	47087660	47087740	38				Teat length	1386
rs462124377	G	G	A/G	13	47087707	47087708	MI0022276	bta-mir-2285m-2	-	47087660	47087740	33				Teat length	1386
rs525969814	G	G	-/G	13	47087707	47087708	MI0022276	bta-mir-2285m-2	-	47087660	47087740	33				Teat length	1386
rs479102252	A	A	A/C	13	47087711	47087712	MI0022276	bta-mir-2285m-2	-	47087660	47087740	29				Teat length	1386
rs441157738	C	C	A/C	13	47087714	47087715	MI0022276	bta-mir-2285m-2	-	47087660	47087740	26				Teat length	1386
rs458112127	T	T	A/T	13	47087718	47087719	MI0022276	bta-mir-2285m-2	-	47087660	47087740	22				Teat length	1386
rs449954218	G	G	A/G/T	13	47087719	47087720	MI0022276	bta-mir-2285m-2	-	47087660	47087740	21				Teat length	1386
rs445825644	A	A	A/C/T	13	47087721	47087722	MI0022276	bta-mir-2285m-2	-	47087660	47087740	19				Teat length	1386
rs469166012	C	C	C/T	13	47087722	47087723	MI0022276	bta-mir-2285m-2	-	47087660	47087740	18				Teat length	1386
rs482997840	G	G	C/G	13	47087729	47087730	MI0022276	bta-mir-2285m-2	-	47087660	47087740	11				Teat length	1386
rs448320097	C	C	C/T	13	47087730	47087731	MI0022276	bta-mir-2285m-2	-	47087660	47087740	10				Teat length	1386
rs135878508	C	C	C/T	13	47087731	47087732	MI0022276	bta-mir-2285m-2	-	47087660	47087740	9				Teat length	1386
rs440019364	T	T	G/T	13	51742423	51742424	MI0005456	bta-mir-103-2	-	51742422	51742497	74				Teat length	1386
rs455844741	A	A	A/G	13	51742466	51742467	MI0005456	bta-mir-103-2	-	51742422	51742497	31				Teat length	1386
rs477213889	A	A	A/C	13	51742488	51742489	MI0005456	bta-mir-103-2	-	51742422	51742497	9				Teat length	1386
rs462631789	C	C	C/T	13	55227360	55227361	MI0025193	bta-mir-133c	+	55227289	55227382	73	bta-miR-133c	16		Teat length	1386
rs471421318	G	G	G/T	13	55227362	55227363	MI0025193	bta-mir-133c	+	55227289	55227382	75	bta-miR-133c	18		Teat length	1386
rs443994813	A	A	A/T	13	55237555	55237556	MI0009719	bta-mir-1-1	-	55237544	55237619	64	bta-miR-1	16		Teat length	1386
rs447689244	C	C	A/C	18	54224758	54224759	MI0013072	bta-mir-2897	+	54224747	54224815	13	bta-miR-2897	11		Teat length	1703
rs461286955	C	C	C/G	18	54224759	54224760	MI0013072	bta-mir-2897	+	54224747	54224815	14	bta-miR-2897	12		Teat length	1703
rs481340462	A	A	A/C/T	18	54224760	54224761	MI0013072	bta-mir-2897	+	54224747	54224815	15	bta-miR-2897	13		Teat length	1703
rs385493425	G	G	-/G	19	38542897	38542898	MI0013059	bta-mir-2886	+	38542846	38542920	53	bta-miR-2886	12		Teat length	1619
rs448369554	G	G	C/G	19	38542897	38542898	MI0013059	bta-mir-2886	+	38542846	38542920	53	bta-miR-2886	12		Teat length	1619
rs480454859	C	C	C/T	19	39081217	39081218	MI0015944	bta-mir-2957	-	39081172	39081242	25	bta-miR-2957	20		Teat length	1619
rs480454859	C	C	C/T	19	39081217	39081218	MI0009748	bta-mir-152	+	39081165	39081250	54	bta-miR-152	0		Teat length	1619
rs450745650	A	A	A/C	19	39081230	39081231	MI0009748	bta-mir-152	+	39081165	39081250	67	bta-miR-152	13		Teat length	1619
rs469287676	T	T	C/T	19	39081233	39081234	MI0009748	bta-mir-152	+	39081165	39081250	70	bta-miR-152	16		Teat length	1619
rs477805418	T	T	C/T	19	39081234	39081235	MI0009748	bta-mir-152	+	39081165	39081250	71	bta-miR-152	17		Teat length	1619
rs444814245	G	G	A/C/G	19	39081236	39081237	MI0009748	bta-mir-152	+	39081165	39081250	73	bta-miR-152	19		Teat length	1619
rs466456349	G	G	G/T	19	39081237	39081238	MI0015944	bta-mir-2957	-	39081172	39081242	5	bta-miR-2957	0		Teat length	1619
rs466456349	G	G	G/T	19	39081237	39081238	MI0009748	bta-mir-152	+	39081165	39081250	74	bta-miR-152	20		Teat length	1619
rs445093098	G	G	C/G	19	40516473	40516474	MI0011370	bta-mir-2342	+	40516423	40516496	52	bta-miR-2342	9		Teat length	1619
rs465244690	T	T	C/T	19	40516483	40516484	MI0011370	bta-mir-2342	+	40516423	40516496	62	bta-miR-2342	19		Teat length	1619
rs461960328	T	T	A/G/T	19	40683973	40683974	MI0021119	bta-mir-4286-1	-	40683920	40683995	22	bta-miR-4286	15		Teat length	1619
rs475666025	C	C	A/C	19	40683975	40683976	MI0021119	bta-mir-4286-1	-	40683920	40683995	20	bta-miR-4286	13		Teat length	1619
rs458957967	A	A	A/G	21	21157513	21157514	MI0011394	bta-mir-2363-2	-	21157505	21157576	63	bta-miR-2363	18		Teat length	1713
rs467511526	C	C	A/C	21	21157516	21157517	MI0011394	bta-mir-2363-2	-	21157505	21157576	60	bta-miR-2363	15		Teat length	1713
rs800675168	C	C	C/T	21	21157517	21157518	MI0011394	bta-mir-2363-2	-	21157505	21157576	59	bta-miR-2363	14		Teat length	1713
rs798895576	AC	AC	-/AC	21	21157521	21157523	MI0011394	bta-mir-2363-2	-	21157505	21157576	55	bta-miR-2363	10		Teat length	1713
rs461291765	A	A	A/C	21	21157531	21157532	MI0011394	bta-mir-2363-2	-	21157505	21157576	45	bta-miR-2363	0		Teat length	1713
rs439626767	T	T	C/T	21	21250131	21250132	MI0009912	bta-mir-9-1	+	21250101	21250190	32	bta-miR-9-5p	15		Teat length	1713
rs462802394	A	A	A/C	21	21250134	21250135	MI0009912	bta-mir-9-1	+	21250101	21250190	35	bta-miR-9-5p	18		Teat length	1713
rs478900129	T	T	G/T	21	21250165	21250166	MI0009912	bta-mir-9-1	+	21250101	21250190	66	bta-miR-9-3p	10		Teat length	1713
rs447461149	C	C	A/C/G	21	21250169	21250170	MI0009912	bta-mir-9-1	+	21250101	21250190	70	bta-miR-9-3p	14		Teat length	1713
rs457897667	G	G	G/T	21	21250170	21250171	MI0009912	bta-mir-9-1	+	21250101	21250190	71	bta-miR-9-3p	15		Teat length	1713
rs477920698	A	A	A/C	21	21250171	21250172	MI0009912	bta-mir-9-1	+	21250101	21250190	72	bta-miR-9-3p	16		Teat length	1713
rs458845300	T	T	C/T	21	22859935	22859936	MI0011395	bta-mir-2364	+	22859905	22859978	32	bta-miR-2364	22		Teat length	1713
rs474316920	C	C	C/T	26	29429657	29429658	MI0022332	bta-mir-2285k-4	+	29429648	29429720	11				Teat length	1651
rs379019464	A	A	A/T	26	29429669	29429670	MI0022332	bta-mir-2285k-4	+	29429648	29429720	23				Teat length	1651
rs448112257	G	G	G/T	26	29429687	29429688	MI0022332	bta-mir-2285k-4	+	29429648	29429720	41				Teat length	1651
rs521300256	T	T	C/T	5	25109091	25109092	MI0005463	bta-mir-331	+	25109057	25109146	36	bta-miR-331-5p	10		Teat length	1565
rs454155021	C	C	C/G	5	26199849	26199850	MI0009766	bta-mir-196a-2	-	26199801	26199885	36	bta-miR-196a	21		Teat length	1565
rs473190685	C	C	A/C	5	26199850	26199851	MI0009766	bta-mir-196a-2	-	26199801	26199885	35	bta-miR-196a	20		Teat length	1565
rs433731117	A	A	A/T	5	26199851	26199852	MI0009766	bta-mir-196a-2	-	26199801	26199885	34	bta-miR-196a	19		Teat length	1565
rs382667897	T	T	C/T	10	47321115	47321116	MI0009762	bta-mir-190a	-	47321061	47321145	30	bta-miR-190a	16		Teat length	10296
rs475153554	T	T	G/T	10	47321119	47321120	MI0009762	bta-mir-190a	-	47321061	47321145	26	bta-miR-190a	12		Teat length	10296
rs469279334	C	C	A/C	13	47087670	47087671	MI0022276	bta-mir-2285m-2	-	47087660	47087740	70	bta-miR-2285m	21		Teat length	1386
rs437860195	A	A	A/G	13	47087672	47087673	MI0022276	bta-mir-2285m-2	-	47087660	47087740	68	bta-miR-2285m	19		Teat length	1386
rs454456140	G	G	G/T	13	47087676	47087677	MI0022276	bta-mir-2285m-2	-	47087660	47087740	64	bta-miR-2285m	15		Teat length	1386
rs474579220	T	T	C/T	13	47087677	47087678	MI0022276	bta-mir-2285m-2	-	47087660	47087740	63	bta-miR-2285m	14		Teat length	1386
rs433559601	A	A	A/T	13	47087680	47087681	MI0022276	bta-mir-2285m-2	-	47087660	47087740	60	bta-miR-2285m	11		Teat length	1386
rs453868179	T	T	C/T	13	47087682	47087683	MI0022276	bta-mir-2285m-2	-	47087660	47087740	58	bta-miR-2285m	9		Teat length	1386
rs460189731	C	C	A/C	13	51742435	51742436	MI0005456	bta-mir-103-2	-	51742422	51742497	62	bta-miR-103	15		Teat length	1386
rs382117533	G	G	A/G	26	29429700	29429701	MI0022332	bta-mir-2285k-4	+	29429648	29429720	54	bta-miR-2285k	10		Teat length	1651
rs442167232	C	C	C/T	10	47321124	47321125	MI0009762	bta-mir-190a	-	47321061	47321145	21	bta-miR-190a	7	inseed	Teat length	10296
rs470669395	G	G	C/G	13	47087684	47087685	MI0022276	bta-mir-2285m-2	-	47087660	47087740	56	bta-miR-2285m	7	inseed	Teat length	1386
rs439863837	G	G	G/T	13	47087686	47087687	MI0022276	bta-mir-2285m-2	-	47087660	47087740	54	bta-miR-2285m	5	inseed	Teat length	1386

## Sheet: UCI
SNP_ID	refNCBI	refUCSC	Allele	Chromosome	chromStart	chromEnd	Pre_miRNA_ID	Pre-miRNA	Strand	Start position of pre-miRNA	End position of pre-miRNA	Position in_pre-miRNA	Name of Mature_sequence	Position in_mature_sequence	inseed	QTL	Number of QTL(#)
rs522455579	A	A	A/C	15	32050819	32050820	MI0011328	bta-mir-2284j	-	32050808	32050882	63				Udder composite index	1602
rs522455579	A	A	A/C	15	32050819	32050820	MI0011329	bta-mir-2312	+	32050809	32050881	12				Udder composite index	1602
rs526029801	G	G	A/G	15	32050828	32050829	MI0011328	bta-mir-2284j	-	32050808	32050882	54				Udder composite index	1602
rs526029801	G	G	A/G	15	32050828	32050829	MI0011329	bta-mir-2312	+	32050809	32050881	21				Udder composite index	1602
rs519643956	T	T	A/T	15	32050841	32050842	MI0011328	bta-mir-2284j	-	32050808	32050882	41				Udder composite index	1602
rs519643956	T	T	A/T	15	32050841	32050842	MI0011329	bta-mir-2312	+	32050809	32050881	34				Udder composite index	1602
rs516478734	G	G	A/G	15	32050872	32050873	MI0011328	bta-mir-2284j	-	32050808	32050882	10				Udder composite index	1602
rs516478734	G	G	A/G	15	32050872	32050873	MI0011329	bta-mir-2312	+	32050809	32050881	65				Udder composite index	1602
rs518713671	C	C	A/C	15	32050874	32050875	MI0011328	bta-mir-2284j	-	32050808	32050882	8				Udder composite index	1602
rs518713671	C	C	A/C	15	32050874	32050875	MI0011329	bta-mir-2312	+	32050809	32050881	67				Udder composite index	1602
rs465451204	C	C	A/C/G	15	33298816	33298817	MI0004753	bta-mir-125b-1	-	33298815	33298902	86				Udder composite index	1602
rs482312771	G	G	C/G	15	33298817	33298818	MI0004753	bta-mir-125b-1	-	33298815	33298902	85				Udder composite index	1602
rs450841883	G	G	C/G	15	33298819	33298820	MI0004753	bta-mir-125b-1	-	33298815	33298902	83				Udder composite index	1602
rs468073321	A	A	A/G	15	33298820	33298821	MI0004753	bta-mir-125b-1	-	33298815	33298902	82				Udder composite index	1602
rs436647959	T	T	G/T	15	33298822	33298823	MI0004753	bta-mir-125b-1	-	33298815	33298902	80				Udder composite index	1602
rs447165812	C	C	C/G	15	33298823	33298824	MI0004753	bta-mir-125b-1	-	33298815	33298902	79				Udder composite index	1602
rs522698381	-	-	-/C	15	33298825	33298825	MI0004753	bta-mir-125b-1	-	33298815	33298902	77				Udder composite index	1602
rs526273607	C	C	-/C	15	33298830	33298831	MI0004753	bta-mir-125b-1	-	33298815	33298902	72				Udder composite index	1602
rs467216258	G	G	G/T	15	33298835	33298836	MI0004753	bta-mir-125b-1	-	33298815	33298902	67				Udder composite index	1602
rs432540874	A	A	A/C	15	33298836	33298837	MI0004753	bta-mir-125b-1	-	33298815	33298902	66				Udder composite index	1602
rs519770900	-	-	-/C	15	33298838	33298838	MI0004753	bta-mir-125b-1	-	33298815	33298902	64				Udder composite index	1602
rs451330115	C	C	A/C	15	33298838	33298839	MI0004753	bta-mir-125b-1	-	33298815	33298902	64				Udder composite index	1602
rs471466897	C	C	C/G	15	33298845	33298846	MI0004753	bta-mir-125b-1	-	33298815	33298902	57				Udder composite index	1602
rs436798134	T	T	G/T	15	33298847	33298848	MI0004753	bta-mir-125b-1	-	33298815	33298902	55				Udder composite index	1602
rs456870708	G	G	C/G	15	33298849	33298850	MI0004753	bta-mir-125b-1	-	33298815	33298902	53				Udder composite index	1602
rs473911704	C	C	C/G	15	33298857	33298858	MI0004753	bta-mir-125b-1	-	33298815	33298902	45				Udder composite index	1602
rs442717110	A	A	A/T	15	33298863	33298864	MI0004753	bta-mir-125b-1	-	33298815	33298902	39				Udder composite index	1602
rs459479513	A	A	A/C	15	33298865	33298866	MI0004753	bta-mir-125b-1	-	33298815	33298902	37				Udder composite index	1602
rs467253339	A	A	A/C	15	33298891	33298892	MI0004753	bta-mir-125b-1	-	33298815	33298902	11				Udder composite index	1602
rs432597468	G	G	A/C/G/T	15	33298897	33298898	MI0004753	bta-mir-125b-1	-	33298815	33298902	5				Udder composite index	1602
rs446195046	C	C	C/G	15	33298898	33298899	MI0004753	bta-mir-125b-1	-	33298815	33298902	4				Udder composite index	1602
rs439775544	C	C	C/T	15	33347597	33347598	MI0005451	bta-let-7a-2	-	33347569	33347640	43				Udder composite index	1602
rs518372923	TT	TT	-/TT	15	33347600	33347602	MI0005451	bta-let-7a-2	-	33347569	33347640	40				Udder composite index	1602
rs477480443	C	C	C/T	15	34628972	34628973	MI0011330	bta-mir-2313	+	34628901	34628974	73				Udder composite index	1602
rs442415627	T	T	G/T	20	6239923	6239924	MI0009872	bta-mir-584-6	-	6239918	6239993	70				Udder composite index	3442
rs462574626	A	A	A/G	20	6239940	6239941	MI0009872	bta-mir-584-6	-	6239918	6239993	53				Udder composite index	3442
rs382378833	T	T	C/T	20	6239943	6239944	MI0009872	bta-mir-584-6	-	6239918	6239993	50				Udder composite index	3442
rs478810981	G	G	A/G	20	6239979	6239980	MI0009872	bta-mir-584-6	-	6239918	6239993	14				Udder composite index	3442
rs474083613	T	T	A/T	23	13082465	13082466	MI0011412	bta-mir-2377	-	13082433	13082501	36				Udder composite index	1639
rs525253567	T	T	-/T	23	13082480	13082481	MI0011412	bta-mir-2377	-	13082433	13082501	21				Udder composite index	1639
rs210246478	T	T	C/T	23	13082482	13082483	MI0011412	bta-mir-2377	-	13082433	13082501	19				Udder composite index	1639
rs453075601	T	T	G/T	23	13082488	13082489	MI0011412	bta-mir-2377	-	13082433	13082501	13				Udder composite index	1639
rs471723203	T	T	G/T	23	13082493	13082494	MI0011412	bta-mir-2377	-	13082433	13082501	8				Udder composite index	1639
rs473303710	C	C	A/C	24	31054809	31054810	MI0011417	bta-mir-2380	+	31054809	31054880	2				Udder composite index	1646
rs432343423	C	C	C/T	24	31054811	31054812	MI0011417	bta-mir-2380	+	31054809	31054880	4				Udder composite index	1646
rs440166753	T	T	A/T	24	31054814	31054815	MI0011417	bta-mir-2380	+	31054809	31054880	7				Udder composite index	1646
rs43771654	A	A	C/T	24	31054831	31054832	MI0011417	bta-mir-2380	+	31054809	31054880	24				Udder composite index	1646
rs473796847	T	T	C/T	24	31054849	31054850	MI0011417	bta-mir-2380	+	31054809	31054880	42				Udder composite index	1646
rs717559370	C	C	C/G	24	31729578	31729579	MI0022299	bta-mir-378c	-	31729549	31729617	39				Udder composite index	1646
rs133122073	T	T	G/T	24	31729612	31729613	MI0022299	bta-mir-378c	-	31729549	31729617	5				Udder composite index	1646
rs465241465	TTTG	TTTG	-/TTTG	24	33897682	33897686	MI0022300	bta-mir-2284y-4	-	33897667	33897743	61				Udder composite index	1646
rs465241465	TTTG	TTTG	-/TTTG	24	33897682	33897686	MI0022296	bta-mir-2285o-3	+	33897665	33897745	22				Udder composite index	1646
rs433743275	C	C	A/C	24	33897738	33897739	MI0022300	bta-mir-2284y-4	-	33897667	33897743	5				Udder composite index	1646
rs433743275	C	C	A/C	24	33897738	33897739	MI0022296	bta-mir-2285o-3	+	33897665	33897745	75				Udder composite index	1646
rs459024864	T	T	C/T	24	34841175	34841176	MI0009718	bta-mir-1-2	+	34841096	34841180	81				Udder composite index	1646
rs446343495	T	T	A/T	24	34844421	34844422	MI0009732	bta-mir-133a-2	+	34844415	34844501	8				Udder composite index	1646
rs464861357	A	A	A/G	24	34844426	34844427	MI0009732	bta-mir-133a-2	+	34844415	34844501	13				Udder composite index	1646
rs525872336	-	-	-/C	24	34844458	34844458	MI0009732	bta-mir-133a-2	+	34844415	34844501	44				Udder composite index	1646
rs448143817	G	G	G/T	24	35602310	35602311	MI0009861	bta-mir-544b-2	-	35602255	35602346	36				Udder composite index	1646
rs719811638	C	C	A/C	24	41395922	41395923	MI0022297	bta-mir-2285o-4	+	41395912	41395989	12				Udder composite index	1646
rs721839598	C	C	C/T	24	41395956	41395957	MI0022297	bta-mir-2285o-4	+	41395912	41395989	46				Udder composite index	1646
rs456037909	A	A	A/C	24	41395982	41395983	MI0022297	bta-mir-2285o-4	+	41395912	41395989	72				Udder composite index	1646
rs459509925	G	G	G/T	28	15505070	15505071	MI0011445	bta-mir-2403	+	15505053	15505127	19				Udder composite index	1663
rs480804163	C	C	C/T	28	15505074	15505075	MI0011445	bta-mir-2403	+	15505053	15505127	23				Udder composite index	1663
rs132748696	C	C	C/T	28	15505124	15505125	MI0011445	bta-mir-2403	+	15505053	15505127	73				Udder composite index	1663
rs479227187	G	G	G/T	28	19569105	19569106	MI0010468	bta-mir-1296	-	19569094	19569184	79				Udder composite index	1663
rs133825806	-	-	-/AG	28	24904020	24904020	MI0022334	bta-mir-6533	-	24903966	24904042	22				Udder composite index	1663
rs799363721	C	C	A/C	28	24904022	24904023	MI0022334	bta-mir-6533	-	24903966	24904042	20				Udder composite index	1663
rs479914038	A	A	A/G	28	24904023	24904024	MI0022334	bta-mir-6533	-	24903966	24904042	19				Udder composite index	1663
rs516349098	-	-	-/A	28	24904028	24904028	MI0022334	bta-mir-6533	-	24903966	24904042	14				Udder composite index	1663
rs448686263	G	G	A/G	28	24904028	24904029	MI0022334	bta-mir-6533	-	24903966	24904042	14				Udder composite index	1663
rs730588582	-	-	-/A	28	24904029	24904029	MI0022334	bta-mir-6533	-	24903966	24904042	13				Udder composite index	1663
rs876343256	-	-	-/T	28	24904038	24904038	MI0022334	bta-mir-6533	-	24903966	24904042	4				Udder composite index	1663
rs522960949	G	G	C/G	28	24904038	24904039	MI0022334	bta-mir-6533	-	24903966	24904042	4				Udder composite index	1663
rs468713187	G	G	A/G	28	24904040	24904041	MI0022334	bta-mir-6533	-	24903966	24904042	2				Udder composite index	1663
rs799389706	TTC	TTC	-/TTC	29	10834205	10834208	MI0021135	bta-mir-2285k-1	+	10834181	10834250	28				Udder composite index	1672
rs440114635	T	T	G/T	29	10834210	10834211	MI0021135	bta-mir-2285k-1	+	10834181	10834250	31				Udder composite index	1672
rs798593781	AGAT	AGAT	-/AGAT	29	10834212	10834216	MI0021135	bta-mir-2285k-1	+	10834181	10834250	36				Udder composite index	1672
rs469668362	T	T	G/T	29	16686235	16686236	MI0009889	bta-mir-708	+	16686224	16686332	13				Udder composite index	1672
rs436764626	C	C	C/T	29	16686241	16686242	MI0009889	bta-mir-708	+	16686224	16686332	19				Udder composite index	1672
rs452039375	T	T	C/T	29	16686242	16686243	MI0009889	bta-mir-708	+	16686224	16686332	20				Udder composite index	1672
rs470563822	G	G	G/T	29	16686243	16686244	MI0009889	bta-mir-708	+	16686224	16686332	21				Udder composite index	1672
rs475041311	T	T	G/T	13	58091726	58091727	MI0021141	bta-mir-6123	+	58091678	58091759	50				Udder composite index	1589
rs442062059	T	T	C/T	13	58091740	58091741	MI0021141	bta-mir-6123	+	58091678	58091759	64				Udder composite index	1589
rs463888878	G	G	G/T	13	58091748	58091749	MI0021141	bta-mir-6123	+	58091678	58091759	72				Udder composite index	1589
rs478632055	A	A	A/T	13	58091757	58091758	MI0021141	bta-mir-6123	+	58091678	58091759	81				Udder composite index	1589
rs455531490	A	A	A/T	13	58091938	58091939	MI0009786	bta-mir-296	+	58091936	58092013	4				Udder composite index	1589
rs439695944	G	G	A/G	13	58092007	58092008	MI0009786	bta-mir-296	+	58091936	58092013	73				Udder composite index	1589
rs465123679	G	G	A/G	13	59489979	59489980	MI0011320	bta-mir-2307	+	59489950	59490018	31				Udder composite index	1589
rs522895956	G	G	-/G	15	32050871	32050872	MI0011328	bta-mir-2284j	-	32050808	32050882	11	bta-miR-2284j	0		Udder composite index	1602
rs522895956	G	G	-/G	15	32050871	32050872	MI0011329	bta-mir-2312	+	32050809	32050881	64	bta-miR-2312	19		Udder composite index	1602
rs473036900	A	A	A/C	15	33298868	33298869	MI0004753	bta-mir-125b-1	-	33298815	33298902	34	bta-miR-125b	20		Udder composite index	1602
rs438569055	A	A	A/G	15	33298870	33298871	MI0004753	bta-mir-125b-1	-	33298815	33298902	32	bta-miR-125b	18		Udder composite index	1602
rs459004199	A	A	A/G	15	33298871	33298872	MI0004753	bta-mir-125b-1	-	33298815	33298902	31	bta-miR-125b	17		Udder composite index	1602
rs482324211	G	G	A/C/G	15	33298872	33298873	MI0004753	bta-mir-125b-1	-	33298815	33298902	30	bta-miR-125b	16		Udder composite index	1602
rs450807972	T	T	A/T	15	33298879	33298880	MI0004753	bta-mir-125b-1	-	33298815	33298902	23	bta-miR-125b	9		Udder composite index	1602
rs447204579	T	T	C/T	15	33298888	33298889	MI0004753	bta-mir-125b-1	-	33298815	33298902	14	bta-miR-125b	0		Udder composite index	1602
rs475958532	G	G	C/G	15	34628918	34628919	MI0011330	bta-mir-2313	+	34628901	34628974	19	bta-miR-2313-5p	10		Udder composite index	1602
rs444635269	G	G	G/T	15	34628919	34628920	MI0011330	bta-mir-2313	+	34628901	34628974	20	bta-miR-2313-5p	11		Udder composite index	1602
rs455194448	A	A	A/C	15	34628920	34628921	MI0011330	bta-mir-2313	+	34628901	34628974	21	bta-miR-2313-5p	12		Udder composite index	1602
rs460520773	G	G	C/G	15	34628959	34628960	MI0011330	bta-mir-2313	+	34628901	34628974	60	bta-miR-2313-3p	9		Udder composite index	1602
rs450084019	C	C	A/C	18	24992700	24992701	MI0005029	bta-mir-138-2	+	24992697	24992779	5				Udder composite index	1617
rs468617460	G	G	C/G	18	24992702	24992703	MI0005029	bta-mir-138-2	+	24992697	24992779	7				Udder composite index	1617
rs433386385	A	A	A/C	18	24992730	24992731	MI0005029	bta-mir-138-2	+	24992697	24992779	35				Udder composite index	1617
rs451914028	C	C	C/G	18	24992732	24992733	MI0005029	bta-mir-138-2	+	24992697	24992779	37				Udder composite index	1617
rs520661050	-	-	-/AA	18	24992733	24992733	MI0005029	bta-mir-138-2	+	24992697	24992779	37				Udder composite index	1617
rs525598757	-	-	-/A	18	24992737	24992737	MI0005029	bta-mir-138-2	+	24992697	24992779	41				Udder composite index	1617
rs470451202	A	A	A/C	18	24992738	24992739	MI0005029	bta-mir-138-2	+	24992697	24992779	43				Udder composite index	1617
rs437501247	A	A	A/C	18	24992746	24992747	MI0005029	bta-mir-138-2	+	24992697	24992779	51				Udder composite index	1617
rs455161708	T	T	C/T	18	24992757	24992758	MI0005029	bta-mir-138-2	+	24992697	24992779	62				Udder composite index	1617
rs524829560	C	C	C/T	18	24992760	24992761	MI0005029	bta-mir-138-2	+	24992697	24992779	65				Udder composite index	1617
rs473609227	G	G	G/T	18	24992768	24992769	MI0005029	bta-mir-138-2	+	24992697	24992779	73				Udder composite index	1617
rs380764141	A	A	A/G	18	25103681	25103682	MI0021130	bta-mir-2285g-1	+	25103670	25103730	13				Udder composite index	1617
rs382891649	C	C	C/T	18	25103693	25103694	MI0021130	bta-mir-2285g-1	+	25103670	25103730	25				Udder composite index	1617
rs714402541	C	C	C/T	18	25148157	25148158	MI0022284	bta-mir-2285n-3	+	25148117	25148192	42				Udder composite index	1617
rs518170579	A	A	A/G	18	26729690	26729691	MI0022285	bta-mir-2285n-4	-	26729655	26729740	50				Udder composite index	1617
rs208185611	A	A	A/C	20	6239959	6239960	MI0009872	bta-mir-584-6	-	6239918	6239993	34	bta-miR-584	16		Udder composite index	3442
rs444992050	T	T	C/T	20	6239961	6239962	MI0009872	bta-mir-584-6	-	6239918	6239993	32	bta-miR-584	14		Udder composite index	3442
rs435235583	A	A	A/C	23	7424225	7424226	MI0011411	bta-mir-2376	-	7424173	7424240	15	SCS	5447		Udder composite index	1639
rs455698347	G	G	G/T	23	13082440	13082441	MI0011412	bta-mir-2377	-	13082433	13082501	61	bta-miR-2377	17		Udder composite index	1639
rs444548847	T	T	A/T	24	31054862	31054863	MI0011417	bta-mir-2380	+	31054809	31054880	55	bta-miR-2380	9		Udder composite index	1646
rs521100904	C	C	C/T	24	33897724	33897725	MI0022300	bta-mir-2284y-4	-	33897667	33897743	19	bta-miR-2284y	9		Udder composite index	1646
rs479536149	A	A	A/G	24	35602271	35602272	MI0009861	bta-mir-544b-2	-	35602255	35602346	75	bta-miR-544b	20		Udder composite index	1646
rs472871066	G	G	C/G	24	35602279	35602280	MI0009861	bta-mir-544b-2	-	35602255	35602346	67	bta-miR-544b	12		Udder composite index	1646
rs437791266	T	T	G/T	24	41395974	41395975	MI0022297	bta-mir-2285o-4	+	41395912	41395989	64	bta-miR-2285o	14		Udder composite index	1646
rs469821185	C	C	C/G	28	15505113	15505114	MI0011445	bta-mir-2403	+	15505053	15505127	62	bta-miR-2403	16		Udder composite index	1663
rs518092330	-	-	-/A	9	25474387	25474387	MI0011538	bta-mir-2284o	+	25474384	25474444	4				Udder composite index	3441
rs797709878	A	A	A/G	9	25474408	25474409	MI0011538	bta-mir-2284o	+	25474384	25474444	26				Udder composite index	3441
rs526979518	T	T	C/T	9	25474409	25474410	MI0011538	bta-mir-2284o	+	25474384	25474444	27				Udder composite index	3441
rs207677665	C	C	C/T	9	25474429	25474430	MI0011538	bta-mir-2284o	+	25474384	25474444	47				Udder composite index	3441
rs462639155	G	G	G/T	9	25474440	25474441	MI0011538	bta-mir-2284o	+	25474384	25474444	58				Udder composite index	3441
rs483291463	A	A	A/T	9	25474443	25474444	MI0011538	bta-mir-2284o	+	25474384	25474444	61				Udder composite index	3441
rs720984795	G	G	A/G	9	26303378	26303379	MI0011539	bta-mir-2477	+	26303342	26303413	38				Udder composite index	3441
rs473771097	T	T	A/T	9	28046287	28046288	MI0011540	bta-mir-2478	-	28046280	28046356	69				Udder composite index	3441
rs473492357	C	C	C/T	9	28046318	28046319	MI0011540	bta-mir-2478	-	28046280	28046356	38				Udder composite index	3441
rs432479863	C	C	A/C	15	33298880	33298881	MI0004753	bta-mir-125b-1	-	33298815	33298902	22	bta-miR-125b	8	inseed	Udder composite index	1602
rs461386600	T	T	A/T	15	33298881	33298882	MI0004753	bta-mir-125b-1	-	33298815	33298902	21	bta-miR-125b	7	inseed	Udder composite index	1602
rs481412295	A	A	A/G	15	33298883	33298884	MI0004753	bta-mir-125b-1	-	33298815	33298902	19	bta-miR-125b	5	inseed	Udder composite index	1602
rs432053091	G	G	C/G	15	34628913	34628914	MI0011330	bta-mir-2313	+	34628901	34628974	14	bta-miR-2313-5p	5	inseed	Udder composite index	1602
rs452225710	C	C	A/C	15	34628914	34628915	MI0011330	bta-mir-2313	+	34628901	34628974	15	bta-miR-2313-5p	6	inseed	Udder composite index	1602
rs475322254	G	G	A/G	15	34628952	34628953	MI0011330	bta-mir-2313	+	34628901	34628974	53	bta-miR-2313-3p	2	inseed	Udder composite index	1602
rs41761413	C	C	C/T	15	34628956	34628957	MI0011330	bta-mir-2313	+	34628901	34628974	57	bta-miR-2313-3p	6	inseed	Udder composite index	1602
rs465062590	C	C	A/C	20	6239973	6239974	MI0009872	bta-mir-584-6	-	6239918	6239993	20	bta-miR-584	2	inseed	Udder composite index	3442
rs521100904	C	C	C/T	24	33897724	33897725	MI0022296	bta-mir-2285o-3	+	33897665	33897745	61	bta-miR-2285o	8	inseed	Udder composite index	1646
rs435055105	T	T	C/T	24	34844467	34844468	MI0009732	bta-mir-133a-2	+	34844415	34844501	54	bta-miR-133a	1	inseed	Udder composite index	1646
rs137070651	T	T	C/T	24	34844470	34844471	MI0009732	bta-mir-133a-2	+	34844415	34844501	57	bta-miR-133a	4	inseed	Udder composite index	1646
rs453577305	C	C	C/T	24	34844471	34844472	MI0009732	bta-mir-133a-2	+	34844415	34844501	58	bta-miR-133a	5	inseed	Udder composite index	1646
rs475191665	C	C	C/G	24	34844474	34844475	MI0009732	bta-mir-133a-2	+	34844415	34844501	61	bta-miR-133a	8	inseed	Udder composite index	1646
rs380149277	C	C	C/T	24	41395964	41395965	MI0022297	bta-mir-2285o-4	+	41395912	41395989	54	bta-miR-2285o	4	inseed	Udder composite index	1646
rs719345781	C	C	C/T	24	41395968	41395969	MI0022297	bta-mir-2285o-4	+	41395912	41395989	58	bta-miR-2285o	8	inseed	Udder composite index	1646
rs135523674	G	G	A/G	28	15505099	15505100	MI0011445	bta-mir-2403	+	15505053	15505127	48	bta-miR-2403	2	inseed	Udder composite index	1663
rs523829450	G	G	C/G	28	15505100	15505101	MI0011445	bta-mir-2403	+	15505053	15505127	49	bta-miR-2403	3	inseed	Udder composite index	1663
rs448114678	A	A	A/G	28	15505102	15505103	MI0011445	bta-mir-2403	+	15505053	15505127	51	bta-miR-2403	5	inseed	Udder composite index	1663
rs523145364	G	G	A/G	28	24903993	24903994	MI0022334	bta-mir-6533	-	24903966	24904042	49	bta-miR-6533	3	inseed	Udder composite index	1663
rs432326926	A	A	A/C	13	55227294	55227295	MI0025193	bta-mir-133c	+	55227289	55227382	7				Udder composite index	1589
rs432326926	A	A	A/C	13	55227294	55227295	MI0009733	bta-mir-133a-1	-	55227292	55227386	92				Udder composite index	1589
rs454296478	A	A	A/T	13	55227295	55227296	MI0025193	bta-mir-133c	+	55227289	55227382	8				Udder composite index	1589
rs454296478	A	A	A/T	13	55227295	55227296	MI0009733	bta-mir-133a-1	-	55227292	55227386	91				Udder composite index	1589
rs472904666	G	G	C/G	13	55227302	55227303	MI0025193	bta-mir-133c	+	55227289	55227382	15				Udder composite index	1589
rs472904666	G	G	C/G	13	55227302	55227303	MI0009733	bta-mir-133a-1	-	55227292	55227386	84				Udder composite index	1589
rs436591897	C	C	C/G	13	55227303	55227304	MI0025193	bta-mir-133c	+	55227289	55227382	16				Udder composite index	1589
rs436591897	C	C	C/G	13	55227303	55227304	MI0009733	bta-mir-133a-1	-	55227292	55227386	83				Udder composite index	1589
rs455074531	T	T	A/T	13	55227304	55227305	MI0025193	bta-mir-133c	+	55227289	55227382	17				Udder composite index	1589
rs455074531	T	T	A/T	13	55227304	55227305	MI0009733	bta-mir-133a-1	-	55227292	55227386	82				Udder composite index	1589
rs476836013	A	A	A/T	13	55227338	55227339	MI0025193	bta-mir-133c	+	55227289	55227382	51				Udder composite index	1589
rs476836013	A	A	A/T	13	55227338	55227339	MI0009733	bta-mir-133a-1	-	55227292	55227386	48				Udder composite index	1589
rs444186133	A	A	A/C	13	55227343	55227344	MI0025193	bta-mir-133c	+	55227289	55227382	56				Udder composite index	1589
rs444186133	A	A	A/C	13	55227343	55227344	MI0009733	bta-mir-133a-1	-	55227292	55227386	43				Udder composite index	1589
rs462631789	C	C	C/T	13	55227360	55227361	MI0009733	bta-mir-133a-1	-	55227292	55227386	26				Udder composite index	1589
rs471421318	G	G	G/T	13	55227362	55227363	MI0009733	bta-mir-133a-1	-	55227292	55227386	24				Udder composite index	1589
rs438391142	C	C	C/G	13	55227382	55227383	MI0025193	bta-mir-133c	+	55227289	55227382	95				Udder composite index	1589
rs438391142	C	C	C/G	13	55227382	55227383	MI0009733	bta-mir-133a-1	-	55227292	55227386	4				Udder composite index	1589
rs467730336	A	A	A/G	13	58091948	58091949	MI0009786	bta-mir-296	+	58091936	58092013	14	bta-miR-296-5p	0		Udder composite index	1589
rs457285484	C	C	C/T	13	58091963	58091964	MI0009786	bta-mir-296	+	58091936	58092013	29	bta-miR-296-5p	15		Udder composite index	1589
rs445327585	A	A	A/C	13	59490005	59490006	MI0011320	bta-mir-2307	+	59489950	59490018	57	bta-miR-2307	10		Udder composite index	1589
rs480706266	T	T	A/T	18	24992715	24992716	MI0005029	bta-mir-138-2	+	24992697	24992779	20	bta-miR-138	10		Udder composite index	1617
rs447699699	G	G	A/G	18	24992723	24992724	MI0005029	bta-mir-138-2	+	24992697	24992779	28	bta-miR-138	18		Udder composite index	1617
rs466354909	A	A	A/T	18	24992727	24992728	MI0005029	bta-mir-138-2	+	24992697	24992779	32	bta-miR-138	22		Udder composite index	1617
rs721833062	G	G	C/G	20	10187794	10187795	MI0025528	bta-mir-7858	-	10187790	10187848	54	bta-miR-7858	18		Udder composite index	3442
rs521989148	G	G	A/G	9	25474398	25474399	MI0011538	bta-mir-2284o	+	25474384	25474444	16	bta-miR-2284o	10		Udder composite index	3441
rs476988784	G	G	G/T	9	25474400	25474401	MI0011538	bta-mir-2284o	+	25474384	25474444	18	bta-miR-2284o	12		Udder composite index	3441
rs451580359	A	A	A/C	9	26303393	26303394	MI0011539	bta-mir-2477	+	26303342	26303413	53	bta-miR-2477	10		Udder composite index	3441
rs470990396	G	G	A/G	9	26303404	26303405	MI0011539	bta-mir-2477	+	26303342	26303413	64	bta-miR-2477	21		Udder composite index	3441
rs443113358	T	T	G/T	9	28046294	28046295	MI0011540	bta-mir-2478	-	28046280	28046356	62	bta-miR-2478	17		Udder composite index	3441
rs453497992	A	A	A/G	9	28046300	28046301	MI0011540	bta-mir-2478	-	28046280	28046356	56	bta-miR-2478	11		Udder composite index	3441
rs459642470	C	C	C/T	13	58091687	58091688	MI0021141	bta-mir-6123	+	58091678	58091759	11	bta-miR-6123	2	inseed	Udder composite index	1589
rs435574990	G	G	C/G	13	58091951	58091952	MI0009786	bta-mir-296	+	58091936	58092013	17	bta-miR-296-5p	3	inseed	Udder composite index	1589
rs475806144	T	T	C/T	13	58091986	58091987	MI0009786	bta-mir-296	+	58091936	58092013	52	bta-miR-296-3p	4	inseed	Udder composite index	1589
rs478393085	T	T	G/T	13	59489996	59489997	MI0011320	bta-mir-2307	+	59489950	59490018	48	bta-miR-2307	1	inseed	Udder composite index	1589
rs517363306	G	G	A/G	13	59490003	59490004	MI0011320	bta-mir-2307	+	59489950	59490018	55	bta-miR-2307	8	inseed	Udder composite index	1589
rs378184310	G	G	A/G	20	10187810	10187811	MI0025528	bta-mir-7858	-	10187790	10187848	38	bta-miR-7858	2	inseed	Udder composite index	3442
rs460143302	G	G	G/T	9	25474394	25474395	MI0011538	bta-mir-2284o	+	25474384	25474444	12	bta-miR-2284o	6	inseed	Udder composite index	3441
rs456690846	G	G	A/G	13	47087698	47087699	MI0022276	bta-mir-2285m-2	-	47087660	47087740	42				Udder composite index	1589
rs476958360	A	A	A/C	13	47087701	47087702	MI0022276	bta-mir-2285m-2	-	47087660	47087740	39				Udder composite index	1589
rs442267741	C	C	C/T	13	47087702	47087703	MI0022276	bta-mir-2285m-2	-	47087660	47087740	38				Udder composite index	1589
rs462124377	G	G	A/G	13	47087707	47087708	MI0022276	bta-mir-2285m-2	-	47087660	47087740	33				Udder composite index	1589
rs525969814	G	G	-/G	13	47087707	47087708	MI0022276	bta-mir-2285m-2	-	47087660	47087740	33				Udder composite index	1589
rs479102252	A	A	A/C	13	47087711	47087712	MI0022276	bta-mir-2285m-2	-	47087660	47087740	29				Udder composite index	1589
rs441157738	C	C	A/C	13	47087714	47087715	MI0022276	bta-mir-2285m-2	-	47087660	47087740	26				Udder composite index	1589
rs458112127	T	T	A/T	13	47087718	47087719	MI0022276	bta-mir-2285m-2	-	47087660	47087740	22				Udder composite index	1589
rs449954218	G	G	A/G/T	13	47087719	47087720	MI0022276	bta-mir-2285m-2	-	47087660	47087740	21				Udder composite index	1589
rs445825644	A	A	A/C/T	13	47087721	47087722	MI0022276	bta-mir-2285m-2	-	47087660	47087740	19				Udder composite index	1589
rs469166012	C	C	C/T	13	47087722	47087723	MI0022276	bta-mir-2285m-2	-	47087660	47087740	18				Udder composite index	1589
rs482997840	G	G	C/G	13	47087729	47087730	MI0022276	bta-mir-2285m-2	-	47087660	47087740	11				Udder composite index	1589
rs448320097	C	C	C/T	13	47087730	47087731	MI0022276	bta-mir-2285m-2	-	47087660	47087740	10				Udder composite index	1589
rs135878508	C	C	C/T	13	47087731	47087732	MI0022276	bta-mir-2285m-2	-	47087660	47087740	9				Udder composite index	1589
rs440019364	T	T	G/T	13	51742423	51742424	MI0005456	bta-mir-103-2	-	51742422	51742497	74				Udder composite index	1589
rs455844741	A	A	A/G	13	51742466	51742467	MI0005456	bta-mir-103-2	-	51742422	51742497	31				Udder composite index	1589
rs477213889	A	A	A/C	13	51742488	51742489	MI0005456	bta-mir-103-2	-	51742422	51742497	9				Udder composite index	1589
rs462631789	C	C	C/T	13	55227360	55227361	MI0025193	bta-mir-133c	+	55227289	55227382	73	bta-miR-133c	16		Udder composite index	1589
rs471421318	G	G	G/T	13	55227362	55227363	MI0025193	bta-mir-133c	+	55227289	55227382	75	bta-miR-133c	18		Udder composite index	1589
rs443994813	A	A	A/T	13	55237555	55237556	MI0009719	bta-mir-1-1	-	55237544	55237619	64	bta-miR-1	16		Udder composite index	1589
rs469279334	C	C	A/C	13	47087670	47087671	MI0022276	bta-mir-2285m-2	-	47087660	47087740	70	bta-miR-2285m	21		Udder composite index	1589
rs437860195	A	A	A/G	13	47087672	47087673	MI0022276	bta-mir-2285m-2	-	47087660	47087740	68	bta-miR-2285m	19		Udder composite index	1589
rs454456140	G	G	G/T	13	47087676	47087677	MI0022276	bta-mir-2285m-2	-	47087660	47087740	64	bta-miR-2285m	15		Udder composite index	1589
rs474579220	T	T	C/T	13	47087677	47087678	MI0022276	bta-mir-2285m-2	-	47087660	47087740	63	bta-miR-2285m	14		Udder composite index	1589
rs433559601	A	A	A/T	13	47087680	47087681	MI0022276	bta-mir-2285m-2	-	47087660	47087740	60	bta-miR-2285m	11		Udder composite index	1589
rs453868179	T	T	C/T	13	47087682	47087683	MI0022276	bta-mir-2285m-2	-	47087660	47087740	58	bta-miR-2285m	9		Udder composite index	1589
rs460189731	C	C	A/C	13	51742435	51742436	MI0005456	bta-mir-103-2	-	51742422	51742497	62	bta-miR-103	15		Udder composite index	1589
rs470669395	G	G	C/G	13	47087684	47087685	MI0022276	bta-mir-2285m-2	-	47087660	47087740	56	bta-miR-2285m	7	inseed	Udder composite index	1589
rs439863837	G	G	G/T	13	47087686	47087687	MI0022276	bta-mir-2285m-2	-	47087660	47087740	54	bta-miR-2285m	5	inseed	Udder composite index	1589

## Sheet: UHT
SNP_ID	refNCBI	refUCSC	Allele	Chromosome	chromStart	chromEnd	Pre_miRNA_ID	Pre-miRNA	Strand	Start position of pre-miRNA	End position of pre-miRNA	Position in_pre-miRNA	Name of Mature_sequence	Position in_mature_sequence	inseed	QTL	Number of QTL(#)
rs379259010	G	G	A/G	20	13408797	13408798	MI0025194	bta-mir-2285z	+	13408703	13408798	96				Udder height	1706
rs383989638	C	C	C/T	20	15213928	15213929	MI0004748	bta-mir-320a-2	+	15213924	15214005	6				Udder height	1706
rs451147152	G	G	G/T	20	15213929	15213930	MI0004748	bta-mir-320a-2	+	15213924	15214005	7				Udder height	1706
rs476246574	A	A	A/C	20	15213930	15213931	MI0004748	bta-mir-320a-2	+	15213924	15214005	8				Udder height	1706
rs443225598	A	A	A/C	20	15213932	15213933	MI0004748	bta-mir-320a-2	+	15213924	15214005	10				Udder height	1706
rs461861479	G	G	A/G	20	15213938	15213939	MI0004748	bta-mir-320a-2	+	15213924	15214005	16				Udder height	1706
rs480348861	C	C	A/C	20	15213940	15213941	MI0004748	bta-mir-320a-2	+	15213924	15214005	18				Udder height	1706
rs440939740	T	T	G/T	20	15213941	15213942	MI0004748	bta-mir-320a-2	+	15213924	15214005	19				Udder height	1706
rs459399425	T	T	G/T	20	15213944	15213945	MI0004748	bta-mir-320a-2	+	15213924	15214005	22				Udder height	1706
rs478309083	C	C	A/C	20	15213948	15213949	MI0004748	bta-mir-320a-2	+	15213924	15214005	26				Udder height	1706
rs516193210	C	C	C/T	20	15213950	15213951	MI0004748	bta-mir-320a-2	+	15213924	15214005	28				Udder height	1706
rs452595132	C	C	C/T	20	15213966	15213967	MI0004748	bta-mir-320a-2	+	15213924	15214005	44				Udder height	1706
rs524953208	-	-	-/G	20	15213996	15213996	MI0004748	bta-mir-320a-2	+	15213924	15214005	73				Udder height	1706
rs524681149	A	A	A/T	20	15213998	15213999	MI0004748	bta-mir-320a-2	+	15213924	15214005	76				Udder height	1706
rs482258734	A	A	A/G	20	15213999	15214000	MI0004748	bta-mir-320a-2	+	15213924	15214005	77				Udder height	1706
rs449331380	G	G	C/G	20	15214000	15214001	MI0004748	bta-mir-320a-2	+	15213924	15214005	78				Udder height	1706
rs468042670	G	G	A/G	20	15214003	15214004	MI0004748	bta-mir-320a-2	+	15213924	15214005	81				Udder height	1706
rs445327694	T	T	A/T	20	15213980	15213981	MI0004748	bta-mir-320a-2	+	15213924	15214005	58	bta-miR-320a	9		Udder height	1706
rs470317354	A	A	A/G	20	15213985	15213986	MI0004748	bta-mir-320a-2	+	15213924	15214005	63	bta-miR-320a	14		Udder height	1706
rs521433668	C	C	-/C	20	15213989	15213990	MI0004748	bta-mir-320a-2	+	15213924	15214005	67	bta-miR-320a	18		Udder height	1706
rs476468274	T	T	A/T	25	35300129	35300130	MI0011428	bta-mir-2388	-	35300128	35300206	77				Udder height	10348
rs443569374	A	A	A/T	25	35300133	35300134	MI0011428	bta-mir-2388	-	35300128	35300206	73				Udder height	10348
rs461908184	A	A	A/C	25	35300134	35300135	MI0011428	bta-mir-2388	-	35300128	35300206	72				Udder height	10348
rs483098217	G	G	A/G	25	35300160	35300161	MI0011428	bta-mir-2388	-	35300128	35300206	46				Udder height	10348
rs43722771	G	G	A/G	25	35300167	35300168	MI0011428	bta-mir-2388	-	35300128	35300206	39				Udder height	10348
rs468740998	T	T	A/T	25	35300168	35300169	MI0011428	bta-mir-2388	-	35300128	35300206	38				Udder height	10348
rs459509925	G	G	G/T	28	15505070	15505071	MI0011445	bta-mir-2403	+	15505053	15505127	19				Udder height	1661
rs480804163	C	C	C/T	28	15505074	15505075	MI0011445	bta-mir-2403	+	15505053	15505127	23				Udder height	1661
rs132748696	C	C	C/T	28	15505124	15505125	MI0011445	bta-mir-2403	+	15505053	15505127	73				Udder height	1661
rs479227187	G	G	G/T	28	19569105	19569106	MI0010468	bta-mir-1296	-	19569094	19569184	79				Udder height	1661
rs133825806	-	-	-/AG	28	24904020	24904020	MI0022334	bta-mir-6533	-	24903966	24904042	22				Udder height	1661
rs799363721	C	C	A/C	28	24904022	24904023	MI0022334	bta-mir-6533	-	24903966	24904042	20				Udder height	1661
rs479914038	A	A	A/G	28	24904023	24904024	MI0022334	bta-mir-6533	-	24903966	24904042	19				Udder height	1661
rs516349098	-	-	-/A	28	24904028	24904028	MI0022334	bta-mir-6533	-	24903966	24904042	14				Udder height	1661
rs448686263	G	G	A/G	28	24904028	24904029	MI0022334	bta-mir-6533	-	24903966	24904042	14				Udder height	1661
rs730588582	-	-	-/A	28	24904029	24904029	MI0022334	bta-mir-6533	-	24903966	24904042	13				Udder height	1661
rs876343256	-	-	-/T	28	24904038	24904038	MI0022334	bta-mir-6533	-	24903966	24904042	4				Udder height	1661
rs522960949	G	G	C/G	28	24904038	24904039	MI0022334	bta-mir-6533	-	24903966	24904042	4				Udder height	1661
rs468713187	G	G	A/G	28	24904040	24904041	MI0022334	bta-mir-6533	-	24903966	24904042	2				Udder height	1661
rs469668362	T	T	G/T	29	16686235	16686236	MI0009889	bta-mir-708	+	16686224	16686332	13				Udder height	1670
rs436764626	C	C	C/T	29	16686241	16686242	MI0009889	bta-mir-708	+	16686224	16686332	19				Udder height	1670
rs452039375	T	T	C/T	29	16686242	16686243	MI0009889	bta-mir-708	+	16686224	16686332	20				Udder height	1670
rs470563822	G	G	G/T	29	16686243	16686244	MI0009889	bta-mir-708	+	16686224	16686332	21				Udder height	1670
rs450248251	A	A	A/C	5	30251648	30251649	MI0011475	bta-mir-2425	+	30251637	30251717	13				Udder height	10278
rs454276859	C	C	C/G	5	30251674	30251675	MI0011475	bta-mir-2425	+	30251637	30251717	39				Udder height	10278
rs472710188	A	A	A/C/T	5	30251680	30251681	MI0011475	bta-mir-2425	+	30251637	30251717	45				Udder height	10278
rs433246293	C	C	C/T	5	30251682	30251683	MI0011475	bta-mir-2425	+	30251637	30251717	47				Udder height	10278
rs451797419	A	A	A/C	5	30251683	30251684	MI0011475	bta-mir-2425	+	30251637	30251717	48				Udder height	10278
rs440977053	T	T	G/T	5	30251709	30251710	MI0011475	bta-mir-2425	+	30251637	30251717	74				Udder height	10278
rs459508610	T	T	C/T	5	30251716	30251717	MI0011475	bta-mir-2425	+	30251637	30251717	81				Udder height	10278
rs480399693	C	C	C/T	25	35300137	35300138	MI0011428	bta-mir-2388	-	35300128	35300206	69	bta-miR-2388-3p	20		Udder height	10348
rs441069804	A	A	A/G	25	35300138	35300139	MI0011428	bta-mir-2388	-	35300128	35300206	68	bta-miR-2388-3p	19		Udder height	10348
rs459373475	C	C	C/G	25	35300140	35300141	MI0011428	bta-mir-2388	-	35300128	35300206	66	bta-miR-2388-3p	17		Udder height	10348
rs477983272	C	C	A/C	25	35300143	35300144	MI0011428	bta-mir-2388	-	35300128	35300206	63	bta-miR-2388-3p	14		Udder height	10348
rs444750627	T	T	A/T	25	35300148	35300149	MI0011428	bta-mir-2388	-	35300128	35300206	58	bta-miR-2388-3p	9		Udder height	10348
rs516193130	A	A	A/C	25	35300184	35300185	MI0011428	bta-mir-2388	-	35300128	35300206	22	bta-miR-2388-5p	11		Udder height	10348
rs469821185	C	C	C/G	28	15505113	15505114	MI0011445	bta-mir-2403	+	15505053	15505127	62	bta-miR-2403	16		Udder height	1661
rs432724822	T	T	A/T	5	25109059	25109060	MI0005463	bta-mir-331	+	25109057	25109146	4	SCS	20620		Udder height	10278
rs451517673	T	T	C/T	5	25109060	25109061	MI0005463	bta-mir-331	+	25109057	25109146	5	SCS	20620		Udder height	10278
rs470073324	G	G	A/G/T	5	25109062	25109063	MI0005463	bta-mir-331	+	25109057	25109146	7	SCS	20620		Udder height	10278
rs437019934	A	A	A/G	5	25109140	25109141	MI0005463	bta-mir-331	+	25109057	25109146	85	SCS	20620		Udder height	10278
rs479159991	A	A	A/T	5	25849829	25849830	MI0005030	bta-mir-148b	-	25849764	25849853	24	SCS	20620		Udder height	10278
rs446078424	A	A	A/T	5	25849834	25849835	MI0005030	bta-mir-148b	-	25849764	25849853	19	SCS	20620		Udder height	10278
rs438251959	A	A	A/G	5	26157898	26157899	MI0009877	bta-mir-615	-	26157879	26157971	73	SCS	20620		Udder height	10278
rs456424841	C	C	C/G	5	26157899	26157900	MI0009877	bta-mir-615	-	26157879	26157971	72	SCS	20620		Udder height	10278
rs474791399	G	G	A/G	5	26157909	26157910	MI0009877	bta-mir-615	-	26157879	26157971	62	SCS	20620		Udder height	10278
rs442111331	A	A	A/C	5	26157910	26157911	MI0009877	bta-mir-615	-	26157879	26157971	61	SCS	20620		Udder height	10278
rs460617771	G	G	A/G	5	26157913	26157914	MI0009877	bta-mir-615	-	26157879	26157971	58	SCS	20620		Udder height	10278
rs472685412	A	A	A/G	5	26157915	26157916	MI0009877	bta-mir-615	-	26157879	26157971	56	SCS	20620		Udder height	10278
rs522490993	-	-	-/A	5	26157926	26157926	MI0009877	bta-mir-615	-	26157879	26157971	45	SCS	20620		Udder height	10278
rs135192547	T	T	C/T	5	26157955	26157956	MI0009877	bta-mir-615	-	26157879	26157971	16	SCS	20620		Udder height	10278
rs446316196	T	T	G/T	5	26199806	26199807	MI0009766	bta-mir-196a-2	-	26199801	26199885	79	SCS	20620		Udder height	10278
rs464663431	A	A	A/C	5	26199810	26199811	MI0009766	bta-mir-196a-2	-	26199801	26199885	75	SCS	20620		Udder height	10278
rs445334840	C	C	A/C	5	26199811	26199812	MI0009766	bta-mir-196a-2	-	26199801	26199885	74	SCS	20620		Udder height	10278
rs437981803	G	G	A/G	5	26199816	26199817	MI0009766	bta-mir-196a-2	-	26199801	26199885	69	SCS	20620		Udder height	10278
rs456356547	A	A	A/C	5	26199845	26199846	MI0009766	bta-mir-196a-2	-	26199801	26199885	40	SCS	20620		Udder height	10278
rs468543262	T	T	C/T	5	26199847	26199848	MI0009766	bta-mir-196a-2	-	26199801	26199885	38	SCS	20620		Udder height	10278
rs435648071	C	C	A/C	5	26199848	26199849	MI0009766	bta-mir-196a-2	-	26199801	26199885	37	SCS	20620		Udder height	10278
rs444077803	C	C	A/C	5	26199873	26199874	MI0009766	bta-mir-196a-2	-	26199801	26199885	12	SCS	20620		Udder height	10278
rs462535706	T	T	C/T	5	26199879	26199880	MI0009766	bta-mir-196a-2	-	26199801	26199885	6	SCS	20620		Udder height	10278
rs435740642	A	A	A/C	5	30251664	30251665	MI0011475	bta-mir-2425	+	30251637	30251717	29	bta-miR-2425-5p	14		Udder height	10278
rs462036920	C	C	C/G	5	30251700	30251701	MI0011475	bta-mir-2425	+	30251637	30251717	65	bta-miR-2425-3p	13		Udder height	10278
rs474133834	T	T	C/T	5	30251702	30251703	MI0011475	bta-mir-2425	+	30251637	30251717	67	bta-miR-2425-3p	15		Udder height	10278
rs439108795	T	T	G/T	5	30952191	30952192	MI0011476	bta-mir-2426	+	30952153	30952226	40	CM	4973		Udder height	4625
rs457697282	A	A	A/C	5	30952204	30952205	MI0011476	bta-mir-2426	+	30952153	30952226	53	CM	4973		Udder height	4625
rs471376487	A	A	A/C	5	30952206	30952207	MI0011476	bta-mir-2426	+	30952153	30952226	55	CM	4973		Udder height	4625
rs443273401	T	T	G/T	5	30952211	30952212	MI0011476	bta-mir-2426	+	30952153	30952226	60	CM	4973		Udder height	4625
rs463447618	T	T	C/T	5	30952220	30952221	MI0011476	bta-mir-2426	+	30952153	30952226	69	CM	4973		Udder height	4625
rs480390600	T	T	G/T	5	30952221	30952222	MI0011476	bta-mir-2426	+	30952153	30952226	70	CM	4973		Udder height	4625
rs438273771	A	A	A/G	5	31283948	31283949	MI0010458	bta-mir-1291	+	31283919	31283992	31	CM	4973		Udder height	4625
rs455256602	C	C	C/G	5	31283952	31283953	MI0010458	bta-mir-1291	+	31283919	31283992	35	CM	4973		Udder height	4625
rs475288931	C	C	A/C	5	31283955	31283956	MI0010458	bta-mir-1291	+	31283919	31283992	38	CM	4973		Udder height	4625
rs442457711	G	G	G/T	5	31283957	31283958	MI0010458	bta-mir-1291	+	31283919	31283992	40	CM	4973		Udder height	4625
rs452822219	T	T	C/T	5	31283959	31283960	MI0010458	bta-mir-1291	+	31283919	31283992	42	CM	4973		Udder height	4625
rs473103242	G	G	A/G	5	31283970	31283971	MI0010458	bta-mir-1291	+	31283919	31283992	53	CM	4973		Udder height	4625
rs438471089	G	G	G/T	5	31283971	31283972	MI0010458	bta-mir-1291	+	31283919	31283992	54	CM	4973		Udder height	4625
rs458753878	C	C	A/C	5	31283972	31283973	MI0010458	bta-mir-1291	+	31283919	31283992	55	CM	4973		Udder height	4625
rs481982184	C	C	A/C	5	31283974	31283975	MI0010458	bta-mir-1291	+	31283919	31283992	57	CM	4973		Udder height	4625
rs444230896	C	C	C/G	5	31283981	31283982	MI0010458	bta-mir-1291	+	31283919	31283992	64	CM	4973		Udder height	4625
rs461297784	C	C	C/G	5	31283988	31283989	MI0010458	bta-mir-1291	+	31283919	31283992	71	CM	4973		Udder height	4625
rs208131360	G	G	C/G	25	35300153	35300154	MI0011428	bta-mir-2388	-	35300128	35300206	53	bta-miR-2388-3p	4	inseed	Udder height	10348
rs135523674	G	G	A/G	28	15505099	15505100	MI0011445	bta-mir-2403	+	15505053	15505127	48	bta-miR-2403	2	inseed	Udder height	1661
rs523829450	G	G	C/G	28	15505100	15505101	MI0011445	bta-mir-2403	+	15505053	15505127	49	bta-miR-2403	3	inseed	Udder height	1661
rs448114678	A	A	A/G	28	15505102	15505103	MI0011445	bta-mir-2403	+	15505053	15505127	51	bta-miR-2403	5	inseed	Udder height	1661
rs523145364	G	G	A/G	28	24903993	24903994	MI0022334	bta-mir-6533	-	24903966	24904042	49	bta-miR-6533	3	inseed	Udder height	1661
rs468749593	G	G	C/G	5	30251654	30251655	MI0011475	bta-mir-2425	+	30251637	30251717	19	bta-miR-2425-5p	4	inseed	Udder height	10278
rs134756375	G	G	C/G	5	30251689	30251690	MI0011475	bta-mir-2425	+	30251637	30251717	54	bta-miR-2425-3p	2	inseed	Udder height	10278
rs443651990	A	A	A/C	5	30251693	30251694	MI0011475	bta-mir-2425	+	30251637	30251717	58	bta-miR-2425-3p	6	inseed	Udder height	10278
rs475041311	T	T	G/T	13	58091726	58091727	MI0021141	bta-mir-6123	+	58091678	58091759	50				Udder height	1586
rs442062059	T	T	C/T	13	58091740	58091741	MI0021141	bta-mir-6123	+	58091678	58091759	64				Udder height	1586
rs463888878	G	G	G/T	13	58091748	58091749	MI0021141	bta-mir-6123	+	58091678	58091759	72				Udder height	1586
rs478632055	A	A	A/T	13	58091757	58091758	MI0021141	bta-mir-6123	+	58091678	58091759	81				Udder height	1586
rs455531490	A	A	A/T	13	58091938	58091939	MI0009786	bta-mir-296	+	58091936	58092013	4				Udder height	1586
rs439695944	G	G	A/G	13	58092007	58092008	MI0009786	bta-mir-296	+	58091936	58092013	73				Udder height	1586
rs465123679	G	G	A/G	13	59489979	59489980	MI0011320	bta-mir-2307	+	59489950	59490018	31				Udder height	1586
rs450084019	C	C	A/C	18	24992700	24992701	MI0005029	bta-mir-138-2	+	24992697	24992779	5				Udder height	1615
rs468617460	G	G	C/G	18	24992702	24992703	MI0005029	bta-mir-138-2	+	24992697	24992779	7				Udder height	1615
rs433386385	A	A	A/C	18	24992730	24992731	MI0005029	bta-mir-138-2	+	24992697	24992779	35				Udder height	1615
rs451914028	C	C	C/G	18	24992732	24992733	MI0005029	bta-mir-138-2	+	24992697	24992779	37				Udder height	1615
rs520661050	-	-	-/AA	18	24992733	24992733	MI0005029	bta-mir-138-2	+	24992697	24992779	37				Udder height	1615
rs525598757	-	-	-/A	18	24992737	24992737	MI0005029	bta-mir-138-2	+	24992697	24992779	41				Udder height	1615
rs470451202	A	A	A/C	18	24992738	24992739	MI0005029	bta-mir-138-2	+	24992697	24992779	43				Udder height	1615
rs437501247	A	A	A/C	18	24992746	24992747	MI0005029	bta-mir-138-2	+	24992697	24992779	51				Udder height	1615
rs455161708	T	T	C/T	18	24992757	24992758	MI0005029	bta-mir-138-2	+	24992697	24992779	62				Udder height	1615
rs524829560	C	C	C/T	18	24992760	24992761	MI0005029	bta-mir-138-2	+	24992697	24992779	65				Udder height	1615
rs473609227	G	G	G/T	18	24992768	24992769	MI0005029	bta-mir-138-2	+	24992697	24992779	73				Udder height	1615
rs380764141	A	A	A/G	18	25103681	25103682	MI0021130	bta-mir-2285g-1	+	25103670	25103730	13				Udder height	1615
rs382891649	C	C	C/T	18	25103693	25103694	MI0021130	bta-mir-2285g-1	+	25103670	25103730	25				Udder height	1615
rs714402541	C	C	C/T	18	25148157	25148158	MI0022284	bta-mir-2285n-3	+	25148117	25148192	42				Udder height	1615
rs518170579	A	A	A/G	18	26729690	26729691	MI0022285	bta-mir-2285n-4	-	26729655	26729740	50				Udder height	1615
rs721833062	G	G	C/G	20	10187794	10187795	MI0025528	bta-mir-7858	-	10187790	10187848	54	bta-miR-7858	18		Udder height	1706
rs521300256	T	T	C/T	5	25109091	25109092	MI0005463	bta-mir-331	+	25109057	25109146	36	bta-miR-331-5p	10		Udder height	10278
rs454155021	C	C	C/G	5	26199849	26199850	MI0009766	bta-mir-196a-2	-	26199801	26199885	36	bta-miR-196a	21		Udder height	10278
rs473190685	C	C	A/C	5	26199850	26199851	MI0009766	bta-mir-196a-2	-	26199801	26199885	35	bta-miR-196a	20		Udder height	10278
rs433731117	A	A	A/T	5	26199851	26199852	MI0009766	bta-mir-196a-2	-	26199801	26199885	34	bta-miR-196a	19		Udder height	10278
rs453487598	A	A	A/G	5	30952182	30952183	MI0011476	bta-mir-2426	+	30952153	30952226	31	bta-miR-2426	16		Udder height	4625
rs473650323	G	G	A/G	5	30952185	30952186	MI0011476	bta-mir-2426	+	30952153	30952226	34	bta-miR-2426	19		Udder height	4625
rs378184310	G	G	A/G	20	10187810	10187811	MI0025528	bta-mir-7858	-	10187790	10187848	38	bta-miR-7858	2	inseed	Udder height	1706
rs449894115	A	A	A/G	5	25849799	25849800	MI0005030	bta-mir-148b	-	25849764	25849853	54	bta-miR-148b	1	inseed	Udder height	10278
rs452341312	A	A	A/G	5	26199862	26199863	MI0009766	bta-mir-196a-2	-	26199801	26199885	23	bta-miR-196a	8	inseed	Udder height	10278
rs470861209	C	C	C/T	5	26199863	26199864	MI0009766	bta-mir-196a-2	-	26199801	26199885	22	bta-miR-196a	7	inseed	Udder height	10278
rs110817643	C	C	C/T	5	31283923	31283924	MI0010458	bta-mir-1291	+	31283919	31283992	6	bta-miR-1291	4	inseed	Udder height	4625
rs432326926	A	A	A/C	13	55227294	55227295	MI0025193	bta-mir-133c	+	55227289	55227382	7				Udder height	1586
rs432326926	A	A	A/C	13	55227294	55227295	MI0009733	bta-mir-133a-1	-	55227292	55227386	92				Udder height	1586
rs454296478	A	A	A/T	13	55227295	55227296	MI0025193	bta-mir-133c	+	55227289	55227382	8				Udder height	1586
rs454296478	A	A	A/T	13	55227295	55227296	MI0009733	bta-mir-133a-1	-	55227292	55227386	91				Udder height	1586
rs472904666	G	G	C/G	13	55227302	55227303	MI0025193	bta-mir-133c	+	55227289	55227382	15				Udder height	1586
rs472904666	G	G	C/G	13	55227302	55227303	MI0009733	bta-mir-133a-1	-	55227292	55227386	84				Udder height	1586
rs436591897	C	C	C/G	13	55227303	55227304	MI0025193	bta-mir-133c	+	55227289	55227382	16				Udder height	1586
rs436591897	C	C	C/G	13	55227303	55227304	MI0009733	bta-mir-133a-1	-	55227292	55227386	83				Udder height	1586
rs455074531	T	T	A/T	13	55227304	55227305	MI0025193	bta-mir-133c	+	55227289	55227382	17				Udder height	1586
rs455074531	T	T	A/T	13	55227304	55227305	MI0009733	bta-mir-133a-1	-	55227292	55227386	82				Udder height	1586
rs476836013	A	A	A/T	13	55227338	55227339	MI0025193	bta-mir-133c	+	55227289	55227382	51				Udder height	1586
rs476836013	A	A	A/T	13	55227338	55227339	MI0009733	bta-mir-133a-1	-	55227292	55227386	48				Udder height	1586
rs444186133	A	A	A/C	13	55227343	55227344	MI0025193	bta-mir-133c	+	55227289	55227382	56				Udder height	1586
rs444186133	A	A	A/C	13	55227343	55227344	MI0009733	bta-mir-133a-1	-	55227292	55227386	43				Udder height	1586
rs462631789	C	C	C/T	13	55227360	55227361	MI0009733	bta-mir-133a-1	-	55227292	55227386	26				Udder height	1586
rs471421318	G	G	G/T	13	55227362	55227363	MI0009733	bta-mir-133a-1	-	55227292	55227386	24				Udder height	1586
rs438391142	C	C	C/G	13	55227382	55227383	MI0025193	bta-mir-133c	+	55227289	55227382	95				Udder height	1586
rs438391142	C	C	C/G	13	55227382	55227383	MI0009733	bta-mir-133a-1	-	55227292	55227386	4				Udder height	1586
rs467730336	A	A	A/G	13	58091948	58091949	MI0009786	bta-mir-296	+	58091936	58092013	14	bta-miR-296-5p	0		Udder height	1586
rs457285484	C	C	C/T	13	58091963	58091964	MI0009786	bta-mir-296	+	58091936	58092013	29	bta-miR-296-5p	15		Udder height	1586
rs445327585	A	A	A/C	13	59490005	59490006	MI0011320	bta-mir-2307	+	59489950	59490018	57	bta-miR-2307	10		Udder height	1586
rs480706266	T	T	A/T	18	24992715	24992716	MI0005029	bta-mir-138-2	+	24992697	24992779	20	bta-miR-138	10		Udder height	1615
rs447699699	G	G	A/G	18	24992723	24992724	MI0005029	bta-mir-138-2	+	24992697	24992779	28	bta-miR-138	18		Udder height	1615
rs466354909	A	A	A/T	18	24992727	24992728	MI0005029	bta-mir-138-2	+	24992697	24992779	32	bta-miR-138	22		Udder height	1615
rs459642470	C	C	C/T	13	58091687	58091688	MI0021141	bta-mir-6123	+	58091678	58091759	11	bta-miR-6123	2	inseed	Udder height	1586
rs435574990	G	G	C/G	13	58091951	58091952	MI0009786	bta-mir-296	+	58091936	58092013	17	bta-miR-296-5p	3	inseed	Udder height	1586
rs475806144	T	T	C/T	13	58091986	58091987	MI0009786	bta-mir-296	+	58091936	58092013	52	bta-miR-296-3p	4	inseed	Udder height	1586
rs478393085	T	T	G/T	13	59489996	59489997	MI0011320	bta-mir-2307	+	59489950	59490018	48	bta-miR-2307	1	inseed	Udder height	1586
rs517363306	G	G	A/G	13	59490003	59490004	MI0011320	bta-mir-2307	+	59489950	59490018	55	bta-miR-2307	8	inseed	Udder height	1586
rs456690846	G	G	A/G	13	47087698	47087699	MI0022276	bta-mir-2285m-2	-	47087660	47087740	42				Udder height	1586
rs476958360	A	A	A/C	13	47087701	47087702	MI0022276	bta-mir-2285m-2	-	47087660	47087740	39				Udder height	1586
rs442267741	C	C	C/T	13	47087702	47087703	MI0022276	bta-mir-2285m-2	-	47087660	47087740	38				Udder height	1586
rs462124377	G	G	A/G	13	47087707	47087708	MI0022276	bta-mir-2285m-2	-	47087660	47087740	33				Udder height	1586
rs525969814	G	G	-/G	13	47087707	47087708	MI0022276	bta-mir-2285m-2	-	47087660	47087740	33				Udder height	1586
rs479102252	A	A	A/C	13	47087711	47087712	MI0022276	bta-mir-2285m-2	-	47087660	47087740	29				Udder height	1586
rs441157738	C	C	A/C	13	47087714	47087715	MI0022276	bta-mir-2285m-2	-	47087660	47087740	26				Udder height	1586
rs458112127	T	T	A/T	13	47087718	47087719	MI0022276	bta-mir-2285m-2	-	47087660	47087740	22				Udder height	1586
rs449954218	G	G	A/G/T	13	47087719	47087720	MI0022276	bta-mir-2285m-2	-	47087660	47087740	21				Udder height	1586
rs445825644	A	A	A/C/T	13	47087721	47087722	MI0022276	bta-mir-2285m-2	-	47087660	47087740	19				Udder height	1586
rs469166012	C	C	C/T	13	47087722	47087723	MI0022276	bta-mir-2285m-2	-	47087660	47087740	18				Udder height	1586
rs482997840	G	G	C/G	13	47087729	47087730	MI0022276	bta-mir-2285m-2	-	47087660	47087740	11				Udder height	1586
rs448320097	C	C	C/T	13	47087730	47087731	MI0022276	bta-mir-2285m-2	-	47087660	47087740	10				Udder height	1586
rs135878508	C	C	C/T	13	47087731	47087732	MI0022276	bta-mir-2285m-2	-	47087660	47087740	9				Udder height	1586
rs440019364	T	T	G/T	13	51742423	51742424	MI0005456	bta-mir-103-2	-	51742422	51742497	74				Udder height	1586
rs455844741	A	A	A/G	13	51742466	51742467	MI0005456	bta-mir-103-2	-	51742422	51742497	31				Udder height	1586
rs477213889	A	A	A/C	13	51742488	51742489	MI0005456	bta-mir-103-2	-	51742422	51742497	9				Udder height	1586
rs462631789	C	C	C/T	13	55227360	55227361	MI0025193	bta-mir-133c	+	55227289	55227382	73	bta-miR-133c	16		Udder height	1586
rs471421318	G	G	G/T	13	55227362	55227363	MI0025193	bta-mir-133c	+	55227289	55227382	75	bta-miR-133c	18		Udder height	1586
rs443994813	A	A	A/T	13	55237555	55237556	MI0009719	bta-mir-1-1	-	55237544	55237619	64	bta-miR-1	16		Udder height	1586
rs469279334	C	C	A/C	13	47087670	47087671	MI0022276	bta-mir-2285m-2	-	47087660	47087740	70	bta-miR-2285m	21		Udder height	1586
rs437860195	A	A	A/G	13	47087672	47087673	MI0022276	bta-mir-2285m-2	-	47087660	47087740	68	bta-miR-2285m	19		Udder height	1586
rs454456140	G	G	G/T	13	47087676	47087677	MI0022276	bta-mir-2285m-2	-	47087660	47087740	64	bta-miR-2285m	15		Udder height	1586
rs474579220	T	T	C/T	13	47087677	47087678	MI0022276	bta-mir-2285m-2	-	47087660	47087740	63	bta-miR-2285m	14		Udder height	1586
rs433559601	A	A	A/T	13	47087680	47087681	MI0022276	bta-mir-2285m-2	-	47087660	47087740	60	bta-miR-2285m	11		Udder height	1586
rs453868179	T	T	C/T	13	47087682	47087683	MI0022276	bta-mir-2285m-2	-	47087660	47087740	58	bta-miR-2285m	9		Udder height	1586
rs460189731	C	C	A/C	13	51742435	51742436	MI0005456	bta-mir-103-2	-	51742422	51742497	62	bta-miR-103	15		Udder height	1586
rs470669395	G	G	C/G	13	47087684	47087685	MI0022276	bta-mir-2285m-2	-	47087660	47087740	56	bta-miR-2285m	7	inseed	Udder height	1586
rs439863837	G	G	G/T	13	47087686	47087687	MI0022276	bta-mir-2285m-2	-	47087660	47087740	54	bta-miR-2285m	5	inseed	Udder height	1586

## Sheet: NEUT
SNP_ID	refNCBI	refUCSC	Allele	Chromosome	chromStart	chromEnd	Pre_miRNA_ID	Pre-miRNA	Strand	Start position of pre-miRNA	End position of pre-miRNA	Position in_pre-miRNA	Name of Mature_sequence	Position in_mature_sequence	inseed	QTL	Number of QTL(#)
rs433582479	C	C	C/G	4	47367065	47367066	MI0011465	bta-mir-2284b	-	47367036	47367106	41				Neutrophil count	19103
rs453301610	A	A	A/G	4	49304453	49304454	MI0011464	bta-mir-2418	-	49304452	49304527	74				Neutrophil count	19103
rs797735685	C	C	C/T	4	49304463	49304464	MI0011464	bta-mir-2418	-	49304452	49304527	64				Neutrophil count	19103
rs475060247	A	A	A/G	4	49304467	49304468	MI0011464	bta-mir-2418	-	49304452	49304527	60				Neutrophil count	19103
rs442077610	G	G	C/G	4	49304468	49304469	MI0011464	bta-mir-2418	-	49304452	49304527	59				Neutrophil count	19103
rs460970423	C	C	C/G	4	49304475	49304476	MI0011464	bta-mir-2418	-	49304452	49304527	52				Neutrophil count	19103
rs473168171	A	A	A/T	4	50323246	50323247	MI0011463	bta-mir-2417	-	50323245	50323319	73				Neutrophil count	19103
rs433898595	A	A	A/C	4	50323247	50323248	MI0011463	bta-mir-2417	-	50323245	50323319	72				Neutrophil count	19103
rs109241061	T	T	G/T	4	50323253	50323254	MI0011463	bta-mir-2417	-	50323245	50323319	66				Neutrophil count	19103
rs473862646	A	A	A/T	4	50323258	50323259	MI0011463	bta-mir-2417	-	50323245	50323319	61				Neutrophil count	19103
rs109043630	A	A	A/G	4	50323265	50323266	MI0011463	bta-mir-2417	-	50323245	50323319	54				Neutrophil count	19103
rs455972120	A	A	A/C	4	50323268	50323269	MI0011463	bta-mir-2417	-	50323245	50323319	51				Neutrophil count	19103
rs471545043	T	T	G/T	4	50323272	50323273	MI0011463	bta-mir-2417	-	50323245	50323319	47				Neutrophil count	19103
rs438466110	A	A	A/T	4	50323274	50323275	MI0011463	bta-mir-2417	-	50323245	50323319	45				Neutrophil count	19103
rs110656452	C	C	C/T	4	50323280	50323281	MI0011463	bta-mir-2417	-	50323245	50323319	39				Neutrophil count	19103
rs479270572	A	A	A/C	4	50323290	50323291	MI0011463	bta-mir-2417	-	50323245	50323319	29				Neutrophil count	19103
rs453899455	C	C	C/T	4	47367090	47367091	MI0011465	bta-mir-2284b	-	47367036	47367106	16	bta-miR-2284b	9		Neutrophil count	19103
rs110555814	G	G	G/T	4	49304498	49304499	MI0011464	bta-mir-2418	-	49304452	49304527	29	bta-miR-2418	21		Neutrophil count	19103
rs443484521	A	A	A/C	4	49304499	49304500	MI0011464	bta-mir-2418	-	49304452	49304527	28	bta-miR-2418	20		Neutrophil count	19103
rs458822162	A	A	A/C	4	49304502	49304503	MI0011464	bta-mir-2418	-	49304452	49304527	25	bta-miR-2418	17		Neutrophil count	19103
rs477347665	C	C	C/T	4	49304503	49304504	MI0011464	bta-mir-2418	-	49304452	49304527	24	bta-miR-2418	16		Neutrophil count	19103
rs443012308	A	A	A/C	4	50323292	50323293	MI0011463	bta-mir-2417	-	50323245	50323319	27	bta-miR-2417	19		Neutrophil count	19103
rs447150505	C	C	C/G	4	49304515	49304516	MI0011464	bta-mir-2418	-	49304452	49304527	12	bta-miR-2418	4	inseed	Neutrophil count	19103
